# Supplementary material for: Comparative Analysis of Co-Cultured Amniotic Cell-Conditioned Media with Cell-Free Amniotic Fluid Reveals Differential Effects on Epithelial–Mesenchymal Transition and Myofibroblast Activation
Source: Biomedicines. 2022 Sep 5;10(9):2189. doi: 10.3390/biomedicines10092189 (PMC9495976; doi:10.3390/biomedicines10092189)
Supplement: Supplementary file 1 [file biomedicines-10-02189-s001.zip]

Archive with 4 entries (4 files):
- biomedicines-1898049-figures.pdf
- Table S1.xlsx
- Table S2.xlsx
- Table S3.xlsx
