# Supplementary material for: Comparative Analysis of Co-Cultured Amniotic Cell-Conditioned Media with Cell-Free Amniotic Fluid Reveals Differential Effects on Epithelial–Mesenchymal Transition and Myofibroblast Activation
Source: Biomedicines. 2022 Sep 5;10(9):2189. doi: 10.3390/biomedicines10092189 (PMC9495976; doi:10.3390/biomedicines10092189)
Supplement: Supplementary file 1 [file biomedicines-10-02189-s001.zip › Table S1.xlsx]

## Sheet: Sheet1
07312018_4_mediaQ+, Samples report created on 07/31/2018
Experiment: 07312018_4_mediaQ+
	Peak List Generator: unknown
		Version: unknown
		Charge States Calculated: unknown
		Deisotoped: unknown
		Textual Annotation: unknown
	Database Set: 5 Databases
		Database Name: 06272018_uniprot-homo+sapiens-filtered-reviewed%3Ayes.fasta
			Version: unknown
			Taxonomy: All Entries
			Number of Proteins: 48294
		Database Name: a reverse concatenated subset of the 06272018_uniprot-homo+sapiens-filtered-reviewed%3Ayes database
			Version: unknown
			Taxonomy: All Entries
			Number of Proteins: 16480
		Database Name: a reverse concatenated subset of the 06272018_uniprot-homo+sapiens-filtered-reviewed%3Ayes database
			Version: unknown
			Taxonomy: All Entries
			Number of Proteins: 23594
		Database Name: a reverse concatenated subset of the 06272018_uniprot-homo+sapiens-filtered-reviewed%3Ayes database
			Version: unknown
			Taxonomy: All Entries
			Number of Proteins: 24462
		Database Name: a reverse concatenated subset of the 06272018_uniprot-homo+sapiens-filtered-reviewed%3Ayes database
			Version: unknown
			Taxonomy: All Entries
			Number of Proteins: 25600
		Does database contain common contaminants?: unknown
	Search Engine Set: 2 Search Engines
		Search Engine: Sequest (XCorr Only)
			Version: IseNode in Proteome Discoverer 2.2.0.388
			Samples: All Samples
			Fragment Tolerance: 0.60 Da (Monoisotopic)
			Parent Tolerance: 10.0 PPM (Monoisotopic)
			Fixed Modifications: +57 on C (Carbamidomethyl)
			Variable Modifications: +16 on M (Oxidation), +42 on Peptide N-Terminal (Acetyl), +57 on C (Carbamidomethyl)
			Database: 06272018_uniprot-homo+sapiens-filtered-reviewed%3Ayes.fasta (unknown version, 48294 entries)
			Digestion Enzyme: Trypsin
			Max Missed Cleavages: 2
			Probability Model:
				20180724_Fair_sf1_03: LFDR Model, Classifier data: Bayes, Good (50%) m:4.87/s:0.814 m:0.570/s:0.102 m:4.87/s:0.814 m:NA m:NA m:NA, Bad (50%) m:3.17/s:0.282 m:0.217/s:0.126 m:3.17/s:0.282 m:NA m:NA m:NA [all charge states]
				20180724_Fair_sf2_04: LFDR Model, Classifier data: Bayes, Good (50%) m:4.24/s:0.996 m:0.482/s:0.142 m:4.24/s:0.996 m:NA m:NA m:NA, Bad (50%) m:2.23/s:0.431 m:0.107/s:0.0992 m:2.23/s:0.431 m:NA m:NA m:NA [all charge states]
				20180724_Fair_sf3_05: LFDR Model, Classifier data: Bayes, Good (50%) m:4.47/s:0.954 m:0.511/s:0.124 m:4.47/s:0.954 m:NA m:NA m:NA, Bad (50%) m:2.41/s:0.349 m:0.113/s:0.0989 m:2.41/s:0.349 m:NA m:NA m:NA [all charge states]
				20180724_Fair_sf4_06: LFDR Model, Classifier data: Bayes, Good (50%) m:4.32/s:0.958 m:0.490/s:0.133 m:4.32/s:0.958 m:NA m:NA m:NA, Bad (50%) m:2.37/s:0.354 m:0.109/s:0.0970 m:2.37/s:0.354 m:NA m:NA m:NA [all charge states]
		Search Engine: X! Tandem
			Version: CYCLONE (2010.12.01.1)
			Samples: All Samples
			Fragment Tolerance: 0.60 Da (Monoisotopic)
			Parent Tolerance: 10.0 PPM (Monoisotopic)
			Fixed Modifications: +57 on C (Carbamidomethyl)
			Variable Modifications: -18 on Peptide N-Terminal (Glu->pyro-Glu), -17 on Peptide N-Terminal (Ammonia-loss), -17 on Peptide N-Terminal (Gln->pyro-Glu), +16 on M (Oxidation), +42 on Peptide N-Terminal (Acetyl), +57 on C (Carbamidomethyl)
			Database: a reverse concatenated subset of the 06272018_uniprot-homo+sapiens-filtered-reviewed%3Ayes database (unknown version, 16480 entries) (20180724_Fair_sf1_03), a reverse concatenated subset of the 06272018_uniprot-homo+sapiens-filtered-reviewed%3Ayes database (unknown version, 23594 entries) (20180724_Fair_sf2_04), a reverse concatenated subset of the 06272018_uniprot-homo+sapiens-filtered…
			Digestion Enzyme: Trypsin (20180724_Fair_sf1_03), Trypsin (20180724_Fair_sf2_04), Trypsin (20180724_Fair_sf3_05), Trypsin (20180724_Fair_sf4_06)
			Max Missed Cleavages: 2 (20180724_Fair_sf1_03), 2 (20180724_Fair_sf2_04), 2 (20180724_Fair_sf3_05), 2 (20180724_Fair_sf4_06)
			Probability Model:
				20180724_Fair_sf1_03: LFDR Model, Classifier data: Bayes, Good (50%) m:3.29/s:1.81 m:49.5/s:11.6 m:3.29/s:1.81 m:0.380/s:0.126 m:0.564/s:0.144, Bad (50%) m:0.392/s:0.393 m:34.6/s:7.02 m:0.392/s:0.393 m:0.123/s:0.0701 m:0.321/s:0.117 [all charge states]
				20180724_Fair_sf2_04: LFDR Model, Classifier data: Bayes, Good (65%) m:3.38/s:2.51 m:54.4/s:14.8 m:3.38/s:2.51 m:0.371/s:0.152 m:0.531/s:0.155, Bad (35%) m:-0.642/s:0.554 m:32.0/s:7.09 m:-0.642/s:0.554 m:0.0537/s:0.0618 m:0.283/s:0.111 [all charge states]
				20180724_Fair_sf3_05: LFDR Model, Classifier data: Bayes, Good (53%) m:3.46/s:2.42 m:54.7/s:14.8 m:3.46/s:2.42 m:0.379/s:0.146 m:0.546/s:0.152, Bad (47%) m:-0.630/s:0.545 m:32.0/s:6.94 m:-0.630/s:0.545 m:0.0517/s:0.0674 m:0.290/s:0.114 [all charge states]
				20180724_Fair_sf4_06: LFDR Model, Classifier data: Bayes, Good (56%) m:3.43/s:2.40 m:54.2/s:14.6 m:3.43/s:2.40 m:0.373/s:0.146 m:0.531/s:0.150, Bad (44%) m:-0.645/s:0.555 m:32.0/s:7.02 m:-0.645/s:0.555 m:0.0525/s:0.0654 m:0.287/s:0.113 [all charge states]
	Scaffold: Version: Scaffold_4.8.7
		Modification Metadata Set: 2334 modifications
			Source: C:\Program Files\Scaffold 4\parameters\unimod.xml
			Comment:
		Protein Grouping Strategy: Experiment-wide grouping with binary peptide-protein weights
		Peptide Thresholds: 95.0% minimum
		Protein Thresholds: 99.0% minimum and 2 peptides minimum
		Peptide FDR: 0.0% (Decoy)
		Protein FDR: 0.3% (Decoy)
		GO Annotation Source(s): NCBI (downloaded Jul 31, 2018)
		Alternate ID Source(s): FASTA:UniProt/Swiss-Prot Alt. Accession (UniProtKB) and NCBI:Gene Name
									Quantitative Value (Normalized Total Spectra)	Quantitative Value (Normalized Total Spectra)	Quantitative Value (Normalized Total Spectra)	Quantitative Value (Normalized Total Spectra)
07312018_4_mediaQ+									blank_control	sample2	sample3	sample4
									SAM_SFM1	SAM_coACCM	SAM_AEC	SAM_AFC
#	Visible?	Starred?	Identified Proteins (1043)	Accession Number	Alternate ID	Molecular Weight	Protein Grouping Ambiguity	Taxonomy	20180724_Fair_sf1_03	20180724_Fair_sf2_04	20180724_Fair_sf3_05	20180724_Fair_sf4_06
1	TRUE	Empty	Fibronectin OS=Homo sapiens OX=9606 GN=FN1 PE=1 SV=4	P02751	FN1	263 kDa	TRUE	Homo sapiens	0	289.66	169.14	325.41
2	TRUE	Empty	Actin, cytoplasmic 2 OS=Homo sapiens OX=9606 GN=ACTG1 PE=1 SV=1	P63261	ACTG1	42 kDa	TRUE	Homo sapiens	116.1	102.11	129.08	92.224
3	TRUE	Empty	Isoform 8 of Filamin-B OS=Homo sapiens OX=9606 GN=FLNB	O75369-8	FLNB	282 kDa	TRUE	unknown	0	150.04	235.02	70.48
4	TRUE	Empty	Glyceraldehyde-3-phosphate dehydrogenase OS=Homo sapiens OX=9606 GN=GAPDH PE=1 SV=3	P04406	GAPDH	36 kDa	TRUE	Homo sapiens	38.701	49.318	75.669	43.488
5	TRUE	Empty	Vimentin OS=Homo sapiens OX=9606 GN=VIM PE=1 SV=4	P08670	VIM	54 kDa	TRUE	Homo sapiens	38.701	59.738	23.146	71.23
6	TRUE	Empty	Filamin-A OS=Homo sapiens OX=9606 GN=FLNA PE=1 SV=4	P21333 (+1)	FLNA	281 kDa	TRUE	Homo sapiens	0	106.28	109.5	98.222
7	TRUE	Empty	Transforming growth factor-beta-induced protein ig-h3 OS=Homo sapiens OX=9606 GN=TGFBI PE=1 SV=1	Q15582	TGFBI	75 kDa		Homo sapiens	0	84.049	30.268	115.47
8	TRUE	Empty	Keratin, type II cytoskeletal 1 OS=Homo sapiens OX=9606 GN=KRT1 PE=1 SV=6	P04264	KRT1	66 kDa	TRUE	Homo sapiens	948.17	21.533	69.438	30.741
9	TRUE	Empty	Neuroblast differentiation-associated protein AHNAK OS=Homo sapiens OX=9606 GN=AHNAK PE=1 SV=2	Q09666	AHNAK	629 kDa		Homo sapiens	0	85.439	0	95.223
10	TRUE	Empty	Alpha-actinin-4 OS=Homo sapiens OX=9606 GN=ACTN4 PE=1 SV=2	O43707	ACTN4	105 kDa	TRUE	Homo sapiens	0	65.989	95.254	50.986
11	TRUE	Empty	Myosin-9 OS=Homo sapiens OX=9606 GN=MYH9 PE=1 SV=4	P35579	MYH9	227 kDa	TRUE	Homo sapiens	0	68.768	48.072	70.48
12	TRUE	Empty	Keratin, type I cytoskeletal 9 OS=Homo sapiens OX=9606 GN=KRT9 PE=1 SV=3	P35527	KRT9	62 kDa	TRUE	Homo sapiens	406.36	14.587	73.889	24.743
13	TRUE	Empty	Alpha-enolase OS=Homo sapiens OX=9606 GN=ENO1 PE=1 SV=2	P06733	ENO1	47 kDa	TRUE	Homo sapiens	87.077	40.288	38.28	47.987
14	TRUE	Empty	Keratin, type I cytoskeletal 10 OS=Homo sapiens OX=9606 GN=KRT10 PE=1 SV=6	P13645	KRT10	59 kDa	TRUE	Homo sapiens	522.46	11.809	48.963	27.742
15	TRUE	Empty	Transgelin-2 OS=Homo sapiens OX=9606 GN=TAGLN2 PE=1 SV=3	P37802 (+1)	TAGLN2	22 kDa		Homo sapiens	0	33.342	50.743	20.244
16	TRUE	Empty	Plectin OS=Homo sapiens OX=9606 GN=PLEC PE=1 SV=3	Q15149	PLEC	532 kDa	TRUE	Homo sapiens	0	56.265	12.463	54.735
17	TRUE	Empty	Tubulin alpha-1B chain OS=Homo sapiens OX=9606 GN=TUBA1B PE=1 SV=1	P68363	TUBA1B	50 kDa	TRUE	Homo sapiens	67.726	27.785	35.609	27.742
18	TRUE	Empty	Spectrin alpha chain, non-erythrocytic 1 OS=Homo sapiens OX=9606 GN=SPTAN1 PE=1 SV=3	Q13813	SPTAN1	285 kDa	TRUE	Homo sapiens	0	45.845	46.292	48.736
19	TRUE	Empty	Plasminogen activator inhibitor 1 OS=Homo sapiens OX=9606 GN=SERPINE1 PE=1 SV=1	P05121	SERPINE1	45 kDa		Homo sapiens	0	34.037	38.28	59.983
20	TRUE	Empty	Alpha-actinin-1 OS=Homo sapiens OX=9606 GN=ACTN1 PE=1 SV=2	P12814	ACTN1	103 kDa	TRUE	Homo sapiens	0	62.516	89.913	58.484
21	TRUE	Empty	Heat shock cognate 71 kDa protein OS=Homo sapiens OX=9606 GN=HSPA8 PE=1 SV=1	P11142	HSPA8	71 kDa	TRUE	Homo sapiens	38.701	38.899	32.938	36.74
22	TRUE	Empty	Pyruvate kinase PKM OS=Homo sapiens OX=9606 GN=PKM PE=1 SV=4	P14618	PKM	58 kDa	TRUE	Homo sapiens	29.026	40.983	46.292	43.488
23	TRUE	Empty	Protein disulfide-isomerase OS=Homo sapiens OX=9606 GN=P4HB PE=1 SV=3	P07237	P4HB	57 kDa		Homo sapiens	0	33.342	56.084	29.992
24	TRUE	Empty	Talin-1 OS=Homo sapiens OX=9606 GN=TLN1 PE=1 SV=3	Q9Y490	TLN1	270 kDa	TRUE	Homo sapiens	0	41.677	16.914	44.238
25	TRUE	Empty	Heat shock protein HSP 90-beta OS=Homo sapiens OX=9606 GN=HSP90AB1 PE=1 SV=4	P08238	HSP90AB1	83 kDa	FALSE	Homo sapiens	38.701	27.09	26.707	38.989
26	TRUE	Empty	Laminin subunit alpha-3 OS=Homo sapiens OX=9606 GN=LAMA3 PE=1 SV=2	Q16787	LAMA3	367 kDa		Homo sapiens	0	34.731	32.938	24.743
27	TRUE	Empty	Thrombospondin-1 OS=Homo sapiens OX=9606 GN=THBS1 PE=1 SV=2	P07996	THBS1	129 kDa	TRUE	Homo sapiens	0	25.006	33.829	38.239
28	TRUE	Empty	Elongation factor 2 OS=Homo sapiens OX=9606 GN=EEF2 PE=1 SV=4	P13639	EEF2	95 kDa	TRUE	Homo sapiens	0	31.258	34.719	35.24
29	TRUE	Empty	Ras GTPase-activating-like protein IQGAP1 OS=Homo sapiens OX=9606 GN=IQGAP1 PE=1 SV=1	P46940	IQGAP1	189 kDa		Homo sapiens	0	28.48	36.499	24.743
30	TRUE	Empty	Tubulin beta-4B chain OS=Homo sapiens OX=9606 GN=TUBB4B PE=1 SV=1	P68371	TUBB4B	50 kDa	TRUE	Homo sapiens	67.726	26.396	34.719	28.492
31	TRUE	Empty	Laminin subunit beta-3 OS=Homo sapiens OX=9606 GN=LAMB3 PE=1 SV=1	Q13751	LAMB3	130 kDa	TRUE	Homo sapiens	0	37.51	31.158	28.492
32	TRUE	Empty	Isoform 2 of Keratin, type II cytoskeletal 8 OS=Homo sapiens OX=9606 GN=KRT8	P05787-2	KRT8	57 kDa	TRUE	unknown	106.43	38.899	29.378	15.746
33	TRUE	Empty	Vinculin OS=Homo sapiens OX=9606 GN=VCL PE=1 SV=4	P18206 (+1)	VCL	124 kDa		Homo sapiens	0	33.342	25.817	29.242
34	TRUE	Empty	L-lactate dehydrogenase A chain OS=Homo sapiens OX=9606 GN=LDHA PE=1 SV=2	P00338	LDHA	37 kDa	TRUE	Homo sapiens	19.35	20.839	38.28	26.992
35	TRUE	Empty	Filamin-C OS=Homo sapiens OX=9606 GN=FLNC PE=1 SV=3	Q14315 (+1)	FLNC	291 kDa	TRUE	Homo sapiens	0	36.12	48.072	33.741
36	TRUE	Empty	Spectrin beta chain, non-erythrocytic 1 OS=Homo sapiens OX=9606 GN=SPTBN1 PE=1 SV=2	Q01082	SPTBN1	275 kDa		Homo sapiens	0	24.312	32.048	22.494
37	TRUE	Empty	Transitional endoplasmic reticulum ATPase OS=Homo sapiens OX=9606 GN=VCP PE=1 SV=4	P55072	VCP	89 kDa		Homo sapiens	0	26.396	29.378	22.494
38	TRUE	Empty	Endoplasmic reticulum chaperone BiP OS=Homo sapiens OX=9606 GN=HSPA5 PE=1 SV=2	P11021	HSPA5	72 kDa	TRUE	Homo sapiens	58.051	29.869	38.28	31.491
39	TRUE	Empty	Laminin subunit gamma-2 OS=Homo sapiens OX=9606 GN=LAMC2 PE=1 SV=2	Q13753	LAMC2	131 kDa		Homo sapiens	0	31.953	21.365	36.74
40	TRUE	Empty	Peptidyl-prolyl cis-trans isomerase A OS=Homo sapiens OX=9606 GN=PPIA PE=1 SV=2	P62937	PPIA	18 kDa		Homo sapiens	48.376	25.006	27.597	17.245
41	TRUE	Empty	Profilin-1 OS=Homo sapiens OX=9606 GN=PFN1 PE=1 SV=2	P07737	PFN1	15 kDa		Homo sapiens	0	15.976	9.7925	13.496
42	TRUE	Empty	Phosphoglycerate kinase 1 OS=Homo sapiens OX=9606 GN=PGK1 PE=1 SV=3	P00558	PGK1	45 kDa		Homo sapiens	38.701	24.312	23.146	17.995
43	TRUE	Empty	Serum albumin OS=Homo sapiens OX=9606 GN=ALB PE=1 SV=2	P02768	ALB	69 kDa		Homo sapiens	135.45	6.2516	18.695	23.993
44	TRUE	Empty	Keratin, type II cytoskeletal 2 epidermal OS=Homo sapiens OX=9606 GN=KRT2 PE=1 SV=2	P35908	KRT2	65 kDa	TRUE	Homo sapiens	512.79	4.8624	28.487	13.496
45	TRUE	Empty	Collagen alpha-1(VII) chain OS=Homo sapiens OX=9606 GN=COL7A1 PE=1 SV=2	Q02388	COL7A1	295 kDa		Homo sapiens	0	25.701	1.7805	40.489
46	TRUE	Empty	Elongation factor 1-alpha 1 OS=Homo sapiens OX=9606 GN=EEF1A1 PE=1 SV=1	P68104 (+1)	EEF1A1	50 kDa		Homo sapiens	58.051	27.09	20.475	21.744
47	TRUE	Empty	Ubiquitin-like modifier-activating enzyme 1 OS=Homo sapiens OX=9606 GN=UBA1 PE=1 SV=3	P22314 (+1)	UBA1	118 kDa		Homo sapiens	0	26.396	21.365	26.992
48	TRUE	Empty	Cytoplasmic dynein 1 heavy chain 1 OS=Homo sapiens OX=9606 GN=DYNC1H1 PE=1 SV=5	Q14204	DYNC1H1	532 kDa		Homo sapiens	0	14.587	23.146	10.497
49	TRUE	Empty	Endoplasmin OS=Homo sapiens OX=9606 GN=HSP90B1 PE=1 SV=1	P14625	HSP90B1	92 kDa	FALSE	Homo sapiens	0	25.006	28.487	20.244
50	TRUE	Empty	Protein disulfide-isomerase A3 OS=Homo sapiens OX=9606 GN=PDIA3 PE=1 SV=4	P30101	PDIA3	57 kDa		Homo sapiens	0	22.228	32.938	17.995
51	TRUE	Empty	Clathrin heavy chain 1 OS=Homo sapiens OX=9606 GN=CLTC PE=1 SV=5	Q00610 (+1)	CLTC	192 kDa		Homo sapiens	0	20.839	26.707	26.243
52	TRUE	Empty	Fructose-bisphosphate aldolase A OS=Homo sapiens OX=9606 GN=ALDOA PE=1 SV=2	P04075 (+1)	ALDOA	39 kDa	TRUE	Homo sapiens	19.35	20.839	30.268	23.993
53	TRUE	Empty	Ezrin OS=Homo sapiens OX=9606 GN=EZR PE=1 SV=4	P15311	EZR	69 kDa	TRUE	Homo sapiens	0	19.449	31.158	11.247
54	TRUE	Empty	Isoform 4 of Gelsolin OS=Homo sapiens OX=9606 GN=GSN	P06396-4	GSN	81 kDa		unknown	0	23.617	29.378	14.246
55	TRUE	Empty	Isoform 6 of Agrin OS=Homo sapiens OX=9606 GN=AGRN	O00468-6	AGRN	215 kDa		unknown	0	22.923	3.5609	36.74
56	TRUE	Empty	Keratin, type I cytoskeletal 18 OS=Homo sapiens OX=9606 GN=KRT18 PE=1 SV=2	P05783	KRT18	48 kDa	TRUE	Homo sapiens	0	25.006	23.146	14.996
57	TRUE	Empty	Prelamin-A/C OS=Homo sapiens OX=9606 GN=LMNA PE=1 SV=1	P02545	LMNA	74 kDa	TRUE	Homo sapiens	0	16.671	24.036	14.246
58	TRUE	Empty	Keratin, type I cytoskeletal 19 OS=Homo sapiens OX=9606 GN=KRT19 PE=1 SV=4	P08727	KRT19	44 kDa	TRUE	Homo sapiens	58.051	23.617	19.585	13.496
59	TRUE	Empty	Heat shock protein HSP 90-alpha OS=Homo sapiens OX=9606 GN=HSP90AA1 PE=1 SV=5	P07900	HSP90AA1	85 kDa	TRUE	Homo sapiens	0	29.174	29.378	33.741
60	TRUE	Empty	Collagen alpha-1(I) chain OS=Homo sapiens OX=9606 GN=COL1A1 PE=1 SV=5	P02452	COL1A1	139 kDa	TRUE	Homo sapiens	19.35	16.671	16.024	18.745
61	TRUE	Empty	Cofilin-1 OS=Homo sapiens OX=9606 GN=CFL1 PE=1 SV=3	P23528	CFL1	19 kDa	TRUE	Homo sapiens	19.35	15.976	20.475	19.495
62	TRUE	Empty	Glutathione S-transferase P OS=Homo sapiens OX=9606 GN=GSTP1 PE=1 SV=2	P09211	GSTP1	23 kDa		Homo sapiens	0	17.366	26.707	16.495
63	TRUE	Empty	14-3-3 protein epsilon OS=Homo sapiens OX=9606 GN=YWHAE PE=1 SV=1	P62258	YWHAE	29 kDa	TRUE	Homo sapiens	29.026	16.671	21.365	17.245
64	TRUE	Empty	Isoform 4 of Tenascin OS=Homo sapiens OX=9606 GN=TNC	P24821-4	TNC	231 kDa	TRUE	unknown	0	19.449	0	34.49
65	TRUE	Empty	Triosephosphate isomerase OS=Homo sapiens OX=9606 GN=TPI1 PE=1 SV=3	P60174 (+1)	TPI1	31 kDa		Homo sapiens	0	15.282	19.585	14.996
66	TRUE	Empty	Isoform 4 of Tropomyosin alpha-1 chain OS=Homo sapiens OX=9606 GN=TPM1	P09493-4	TPM1	33 kDa	TRUE	unknown	0	13.892	25.817	11.247
67	TRUE	Empty	Calmodulin-3 OS=Homo sapiens OX=9606 GN=CALM3 PE=1 SV=1	P0DP25	CALM3	17 kDa		Homo sapiens	0	22.228	16.024	18.745
68	TRUE	Empty	Transketolase OS=Homo sapiens OX=9606 GN=TKT PE=1 SV=3	P29401 (+1)	TKT	68 kDa		Homo sapiens	0	14.587	20.475	17.245
69	TRUE	Empty	Calreticulin OS=Homo sapiens OX=9606 GN=CALR PE=1 SV=1	P27797	CALR	48 kDa		Homo sapiens	0	17.366	23.146	17.245
70	TRUE	Empty	SPARC OS=Homo sapiens OX=9606 GN=SPARC PE=1 SV=1	P09486	SPARC	35 kDa	TRUE	Homo sapiens	0	15.282	17.805	17.995
71	TRUE	Empty	Annexin A2 OS=Homo sapiens OX=9606 GN=ANXA2 PE=1 SV=2	P07355	ANXA2	39 kDa		Homo sapiens	87.077	11.809	19.585	14.246
72	TRUE	Empty	Insulin-like growth factor-binding protein 7 OS=Homo sapiens OX=9606 GN=IGFBP7 PE=1 SV=1	Q16270 (+1)	IGFBP7	29 kDa		Homo sapiens	0	15.976	12.463	21.744
73	TRUE	Empty	Protein disulfide-isomerase A4 OS=Homo sapiens OX=9606 GN=PDIA4 PE=1 SV=2	P13667	PDIA4	73 kDa		Homo sapiens	0	13.892	18.695	11.997
74	TRUE	Empty	Eukaryotic initiation factor 4A-I OS=Homo sapiens OX=9606 GN=EIF4A1 PE=1 SV=1	P60842	EIF4A1	46 kDa	TRUE	Homo sapiens	0	15.282	15.134	17.245
75	TRUE	Empty	Collagen alpha-2(I) chain OS=Homo sapiens OX=9606 GN=COL1A2 PE=1 SV=7	P08123	COL1A2	129 kDa		Homo sapiens	0	24.312	22.256	1.4996
76	TRUE	Empty	Rab GDP dissociation inhibitor beta OS=Homo sapiens OX=9606 GN=GDI2 PE=1 SV=2	P50395	GDI2	51 kDa	TRUE	Homo sapiens	0	13.198	21.365	8.2477
77	TRUE	Empty	Nucleolin OS=Homo sapiens OX=9606 GN=NCL PE=1 SV=3	P19338	NCL	77 kDa		Homo sapiens	0	11.809	15.134	16.495
78	TRUE	Empty	Serpin H1 OS=Homo sapiens OX=9606 GN=SERPINH1 PE=1 SV=2	P50454	SERPINH1	46 kDa		Homo sapiens	0	15.282	26.707	8.9975
79	TRUE	Empty	Hypoxia up-regulated protein 1 OS=Homo sapiens OX=9606 GN=HYOU1 PE=1 SV=1	Q9Y4L1	HYOU1	111 kDa		Homo sapiens	0	15.282	11.573	16.495
80	TRUE	Empty	Phosphoglycerate mutase 1 OS=Homo sapiens OX=9606 GN=PGAM1 PE=1 SV=2	P18669	PGAM1	29 kDa	TRUE	Homo sapiens	0	16.671	16.914	17.245
81	TRUE	Empty	Moesin OS=Homo sapiens OX=9606 GN=MSN PE=1 SV=3	P26038	MSN	68 kDa	TRUE	Homo sapiens	0	18.06	20.475	20.244
82	TRUE	Empty	Sulfhydryl oxidase 1 OS=Homo sapiens OX=9606 GN=QSOX1 PE=1 SV=3	O00391	QSOX1	83 kDa		Homo sapiens	0	16.671	9.7925	17.995
83	TRUE	Empty	Plastin-3 OS=Homo sapiens OX=9606 GN=PLS3 PE=1 SV=4	P13797	PLS3	71 kDa	TRUE	Homo sapiens	0	17.366	23.146	7.4979
84	TRUE	Empty	Keratin, type I cytoskeletal 14 OS=Homo sapiens OX=9606 GN=KRT14 PE=1 SV=4	P02533	KRT14	52 kDa	TRUE	Homo sapiens	212.85	8.3355	18.695	6.7481
85	TRUE	Empty	Heat shock 70 kDa protein 1B OS=Homo sapiens OX=9606 GN=HSPA1B PE=1 SV=1	P0DMV9	HSPA1B	70 kDa	TRUE	Homo sapiens	0	15.976	10.683	17.995
86	TRUE	Empty	Microtubule-associated protein 4 OS=Homo sapiens OX=9606 GN=MAP4 PE=1 SV=3	P27816	MAP4	121 kDa		Homo sapiens	0	16.671	11.573	10.497
87	TRUE	Empty	Puromycin-sensitive aminopeptidase OS=Homo sapiens OX=9606 GN=NPEPPS PE=1 SV=2	P55786	NPEPPS	103 kDa		Homo sapiens	0	11.114	21.365	10.497
88	TRUE	Empty	Peroxidasin homolog OS=Homo sapiens OX=9606 GN=PXDN PE=1 SV=2	Q92626	PXDN	165 kDa		Homo sapiens	0	16.671	5.3414	19.495
89	TRUE	Empty	Keratin, type II cytoskeletal 7 OS=Homo sapiens OX=9606 GN=KRT7 PE=1 SV=5	P08729	KRT7	51 kDa	TRUE	Homo sapiens	0	17.366	19.585	12.746
90	TRUE	Empty	Basement membrane-specific heparan sulfate proteoglycan core protein OS=Homo sapiens OX=9606 GN=HSPG2 PE=1 SV=4	P98160	HSPG2	469 kDa		Homo sapiens	0	14.587	4.4511	23.243
91	TRUE	Empty	Adenylyl cyclase-associated protein 1 OS=Homo sapiens OX=9606 GN=CAP1 PE=1 SV=5	Q01518	CAP1	52 kDa		Homo sapiens	0	13.892	10.683	14.996
92	TRUE	Empty	Plasminogen activator inhibitor 2 OS=Homo sapiens OX=9606 GN=SERPINB2 PE=1 SV=2	P05120	SERPINB2	47 kDa	TRUE	Homo sapiens	0	15.282	29.378	0
93	TRUE	Empty	Peptidyl-prolyl cis-trans isomerase B OS=Homo sapiens OX=9606 GN=PPIB PE=1 SV=2	P23284	PPIB	24 kDa		Homo sapiens	0	9.0301	15.134	7.4979
94	TRUE	Empty	Calumenin OS=Homo sapiens OX=9606 GN=CALU PE=1 SV=2	O43852 (+1)	CALU	37 kDa	TRUE	Homo sapiens	0	15.976	21.365	4.4987
95	TRUE	Empty	ATP-citrate synthase OS=Homo sapiens OX=9606 GN=ACLY PE=1 SV=3	P53396	ACLY	121 kDa		Homo sapiens	0	13.198	10.683	13.496
96	TRUE	Empty	Actin, alpha cardiac muscle 1 OS=Homo sapiens OX=9606 GN=ACTC1 PE=1 SV=1	P68032 (+1)	ACTC1	42 kDa	TRUE	Homo sapiens	0	0	72.108	54.735
97	TRUE	Empty	Nucleophosmin OS=Homo sapiens OX=9606 GN=NPM1 PE=1 SV=2	P06748	NPM1	33 kDa		Homo sapiens	0	11.809	10.683	14.246
98	TRUE	Empty	WD repeat-containing protein 1 OS=Homo sapiens OX=9606 GN=WDR1 PE=1 SV=4	O75083	WDR1	66 kDa		Homo sapiens	0	13.198	16.024	12.746
99	TRUE	Empty	14-3-3 protein zeta/delta OS=Homo sapiens OX=9606 GN=YWHAZ PE=1 SV=1	P63104	YWHAZ	28 kDa	TRUE	Homo sapiens	0	18.755	21.365	19.495
100	TRUE	Empty	Complement C3 OS=Homo sapiens OX=9606 GN=C3 PE=1 SV=2	P01024	C3	187 kDa		Homo sapiens	0	7.6409	0	18.745
101	TRUE	Empty	Isoform 3 of Nucleoside diphosphate kinase B OS=Homo sapiens OX=9606 GN=NME2	P22392-2	NME2	30 kDa	TRUE	unknown	19.35	11.114	12.463	8.2477
102	TRUE	Empty	Protein disulfide-isomerase A6 OS=Homo sapiens OX=9606 GN=PDIA6 PE=1 SV=1	Q15084 (+4)	PDIA6	48 kDa		Homo sapiens	0	12.503	16.024	13.496
103	TRUE	Empty	Neutral alpha-glucosidase AB OS=Homo sapiens OX=9606 GN=GANAB PE=1 SV=3	Q14697 (+1)	GANAB	107 kDa		Homo sapiens	0	9.7247	13.353	8.2477
104	TRUE	Empty	PDZ and LIM domain protein 1 OS=Homo sapiens OX=9606 GN=PDLIM1 PE=1 SV=4	O00151	PDLIM1	36 kDa		Homo sapiens	0	15.976	18.695	8.2477
105	TRUE	Empty	Fatty acid synthase OS=Homo sapiens OX=9606 GN=FASN PE=1 SV=3	P49327	FASN	273 kDa		Homo sapiens	0	10.419	8.9023	11.247
106	TRUE	Empty	Peroxiredoxin-1 OS=Homo sapiens OX=9606 GN=PRDX1 PE=1 SV=1	Q06830	PRDX1	22 kDa	TRUE	Homo sapiens	29.026	10.419	8.9023	10.497
107	TRUE	Empty	X-ray repair cross-complementing protein 6 OS=Homo sapiens OX=9606 GN=XRCC6 PE=1 SV=2	P12956	XRCC6	70 kDa		Homo sapiens	0	11.809	8.0121	11.997
108	TRUE	Empty	Heat shock protein beta-1 OS=Homo sapiens OX=9606 GN=HSPB1 PE=1 SV=2	P04792	HSPB1	23 kDa		Homo sapiens	0	11.114	18.695	6.7481
109	TRUE	Empty	Microtubule-associated protein 1B OS=Homo sapiens OX=9606 GN=MAP1B PE=1 SV=2	P46821	MAP1B	271 kDa	TRUE	Homo sapiens	0	9.7247	12.463	6.7481
110	TRUE	Empty	Eukaryotic translation initiation factor 5A-1 OS=Homo sapiens OX=9606 GN=EIF5A PE=1 SV=2	P63241	EIF5A	17 kDa		Homo sapiens	0	11.114	10.683	8.2477
111	TRUE	Empty	Peroxiredoxin-6 OS=Homo sapiens OX=9606 GN=PRDX6 PE=1 SV=3	P30041	PRDX6	25 kDa		Homo sapiens	0	11.114	17.805	8.9975
112	TRUE	Empty	Desmoplakin OS=Homo sapiens OX=9606 GN=DSP PE=1 SV=3	P15924	DSP	332 kDa		Homo sapiens	96.752	4.8624	5.3414	1.4996
113	TRUE	Empty	Staphylococcal nuclease domain-containing protein 1 OS=Homo sapiens OX=9606 GN=SND1 PE=1 SV=1	Q7KZF4	SND1	102 kDa		Homo sapiens	0	11.114	11.573	11.997
114	TRUE	Empty	Keratin, type II cytoskeletal 5 OS=Homo sapiens OX=9606 GN=KRT5 PE=1 SV=3	P13647	KRT5	62 kDa	TRUE	Homo sapiens	212.85	3.4731	14.244	4.4987
115	TRUE	Empty	Fibrillin-1 OS=Homo sapiens OX=9606 GN=FBN1 PE=1 SV=3	P35555	FBN1	312 kDa	TRUE	Homo sapiens	0	8.3355	3.5609	13.496
116	TRUE	Empty	Glucose-6-phosphate isomerase OS=Homo sapiens OX=9606 GN=GPI PE=1 SV=4	P06744	GPI	63 kDa		Homo sapiens	0	9.0301	12.463	11.247
117	TRUE	Empty	Collagen alpha-2(IV) chain OS=Homo sapiens OX=9606 GN=COL4A2 PE=1 SV=4	P08572	COL4A2	168 kDa		Homo sapiens	0	15.282	1.7805	20.244
118	TRUE	Empty	Alpha-1-antitrypsin OS=Homo sapiens OX=9606 GN=SERPINA1 PE=1 SV=3	P01009	SERPINA1	47 kDa		Homo sapiens	0	11.114	0	16.495
119	TRUE	Empty	Collagen alpha-1(VI) chain OS=Homo sapiens OX=9606 GN=COL6A1 PE=1 SV=3	P12109	COL6A1	109 kDa		Homo sapiens	0	15.282	0	18.745
120	TRUE	Empty	T-complex protein 1 subunit beta OS=Homo sapiens OX=9606 GN=CCT2 PE=1 SV=4	P78371	CCT2	57 kDa		Homo sapiens	0	9.0301	11.573	11.997
121	TRUE	Empty	Glia-derived nexin OS=Homo sapiens OX=9606 GN=SERPINE2 PE=1 SV=1	P07093	SERPINE2	44 kDa		Homo sapiens	0	11.114	5.3414	19.495
122	TRUE	Empty	Macrophage-capping protein OS=Homo sapiens OX=9606 GN=CAPG PE=1 SV=2	P40121	CAPG	38 kDa		Homo sapiens	0	14.587	14.244	8.9975
123	TRUE	Empty	Keratin, type II cytoskeletal 6A OS=Homo sapiens OX=9606 GN=KRT6A PE=1 SV=3	P02538	KRT6A	60 kDa	TRUE	Homo sapiens	212.85	4.1677	15.134	5.2485
124	TRUE	Empty	Catenin alpha-1 OS=Homo sapiens OX=9606 GN=CTNNA1 PE=1 SV=1	P35221	CTNNA1	100 kDa	TRUE	Homo sapiens	0	9.7247	5.3414	10.497
125	TRUE	Empty	Heat shock 70 kDa protein 4 OS=Homo sapiens OX=9606 GN=HSPA4 PE=1 SV=4	P34932	HSPA4	94 kDa		Homo sapiens	0	9.7247	10.683	9.7473
126	TRUE	Empty	Transgelin OS=Homo sapiens OX=9606 GN=TAGLN PE=1 SV=4	Q01995	TAGLN	23 kDa		Homo sapiens	0	12.503	17.805	7.4979
127	TRUE	Empty	Heterogeneous nuclear ribonucleoprotein Q OS=Homo sapiens OX=9606 GN=SYNCRIP PE=1 SV=2	O60506 (+1)	SYNCRIP	70 kDa	TRUE	Homo sapiens	0	10.419	6.2316	8.2477
128	TRUE	Empty	Glycine--tRNA ligase OS=Homo sapiens OX=9606 GN=GARS PE=1 SV=3	P41250	GARS	83 kDa		Homo sapiens	0	7.6409	16.914	9.7473
129	TRUE	Empty	Tubulin beta chain OS=Homo sapiens OX=9606 GN=TUBB PE=1 SV=2	P07437	TUBB	50 kDa	TRUE	Homo sapiens	77.402	27.785	41.841	28.492
130	TRUE	Empty	Clusterin OS=Homo sapiens OX=9606 GN=CLU PE=1 SV=1	P10909 (+2)	CLU	52 kDa		Homo sapiens	0	13.198	15.134	2.9992
131	TRUE	Empty	Matrilysin OS=Homo sapiens OX=9606 GN=MMP7 PE=1 SV=1	P09237	MMP7	30 kDa		Homo sapiens	0	12.503	0	16.495
132	TRUE	Empty	L-lactate dehydrogenase B chain OS=Homo sapiens OX=9606 GN=LDHB PE=1 SV=2	P07195	LDHB	37 kDa	TRUE	Homo sapiens	0	5.557	8.0121	11.997
133	TRUE	Empty	Laminin subunit gamma-1 OS=Homo sapiens OX=9606 GN=LAMC1 PE=1 SV=3	P11047	LAMC1	178 kDa		Homo sapiens	0	10.419	9.7925	11.247
134	TRUE	Empty	Glycogen phosphorylase, liver form OS=Homo sapiens OX=9606 GN=PYGL PE=1 SV=4	P06737 (+1)	PYGL	97 kDa	TRUE	Homo sapiens	0	6.9462	22.256	3.7489
135	TRUE	Empty	Procollagen-lysine,2-oxoglutarate 5-dioxygenase 1 OS=Homo sapiens OX=9606 GN=PLOD1 PE=1 SV=2	Q02809	PLOD1	84 kDa		Homo sapiens	0	10.419	15.134	7.4979
136	TRUE	Empty	Calsyntenin-1 OS=Homo sapiens OX=9606 GN=CLSTN1 PE=1 SV=1	O94985 (+1)	CLSTN1	110 kDa		Homo sapiens	0	7.6409	3.5609	14.996
137	TRUE	Empty	Cadherin-2 OS=Homo sapiens OX=9606 GN=CDH2 PE=1 SV=4	P19022	CDH2	100 kDa		Homo sapiens	0	12.503	0	17.995
138	TRUE	Empty	Serotransferrin OS=Homo sapiens OX=9606 GN=TF PE=1 SV=3	P02787	TF	77 kDa	TRUE	Homo sapiens	19.35	8.3355	4.4511	16.495
139	TRUE	Empty	Niban-like protein 1 OS=Homo sapiens OX=9606 GN=FAM129B PE=1 SV=3	Q96TA1 (+1)	FAM129B	84 kDa		Homo sapiens	0	8.3355	16.914	8.2477
140	TRUE	Empty	Protein S100-A11 OS=Homo sapiens OX=9606 GN=S100A11 PE=1 SV=2	P31949	S100A11	12 kDa		Homo sapiens	0	11.114	8.9023	7.4979
141	TRUE	Empty	Chloride intracellular channel protein 4 OS=Homo sapiens OX=9606 GN=CLIC4 PE=1 SV=4	Q9Y696	CLIC4	29 kDa	TRUE	Homo sapiens	0	8.3355	13.353	3.7489
142	TRUE	Empty	Nucleobindin-1 OS=Homo sapiens OX=9606 GN=NUCB1 PE=1 SV=4	Q02818	NUCB1	54 kDa		Homo sapiens	0	10.419	1.7805	14.996
143	TRUE	Empty	Nidogen-2 OS=Homo sapiens OX=9606 GN=NID2 PE=1 SV=3	Q14112 (+1)	NID2	151 kDa	TRUE	Homo sapiens	0	11.114	16.914	0
144	TRUE	Empty	Drebrin OS=Homo sapiens OX=9606 GN=DBN1 PE=1 SV=4	Q16643 (+1)	DBN1	71 kDa		Homo sapiens	0	6.9462	14.244	6.7481
145	TRUE	Empty	Lysyl oxidase homolog 2 OS=Homo sapiens OX=9606 GN=LOXL2 PE=1 SV=1	Q9Y4K0	LOXL2	87 kDa		Homo sapiens	0	7.6409	0	17.245
146	TRUE	Empty	Galectin-1 OS=Homo sapiens OX=9606 GN=LGALS1 PE=1 SV=2	P09382	LGALS1	15 kDa		Homo sapiens	0	12.503	6.2316	10.497
147	TRUE	Empty	Fascin OS=Homo sapiens OX=9606 GN=FSCN1 PE=1 SV=3	Q16658	FSCN1	55 kDa		Homo sapiens	0	9.7247	9.7925	11.247
148	TRUE	Empty	Aldose reductase OS=Homo sapiens OX=9606 GN=AKR1B1 PE=1 SV=3	P15121	AKR1B1	36 kDa		Homo sapiens	0	6.2516	0	13.496
149	TRUE	Empty	Heterogeneous nuclear ribonucleoproteins A2/B1 OS=Homo sapiens OX=9606 GN=HNRNPA2B1 PE=1 SV=2	P22626	HNRNPA2B1	37 kDa		Homo sapiens	29.026	9.7247	4.4511	5.2485
150	TRUE	Empty	Protein-glutamine gamma-glutamyltransferase 2 OS=Homo sapiens OX=9606 GN=TGM2 PE=1 SV=2	P21980	TGM2	77 kDa		Homo sapiens	0	9.7247	16.024	4.4987
151	TRUE	Empty	14-3-3 protein theta OS=Homo sapiens OX=9606 GN=YWHAQ PE=1 SV=1	P27348	YWHAQ	28 kDa	TRUE	Homo sapiens	0	13.198	17.805	14.246
152	TRUE	Empty	Actin-related protein 3 OS=Homo sapiens OX=9606 GN=ACTR3 PE=1 SV=3	P61158	ACTR3	47 kDa		Homo sapiens	0	8.3355	8.9023	7.4979
153	TRUE	Empty	Isoform 4 of Caldesmon OS=Homo sapiens OX=9606 GN=CALD1	Q05682-4	CALD1	63 kDa		unknown	0	9.7247	13.353	4.4987
154	TRUE	Empty	Involucrin OS=Homo sapiens OX=9606 GN=IVL PE=1 SV=2	P07476	IVL	68 kDa		Homo sapiens	0	6.2516	19.585	0
155	TRUE	Empty	Serine/threonine-protein phosphatase 2A 65 kDa regulatory subunit A alpha isoform OS=Homo sapiens OX=9606 GN=PPP2R1A PE=1 SV=4	P30153	PPP2R1A	65 kDa		Homo sapiens	0	8.3355	9.7925	8.2477
156	TRUE	Empty	Isoform 2 of Tropomyosin alpha-3 chain OS=Homo sapiens OX=9606 GN=TPM3	P06753-2 (+1)	TPM3	29 kDa	TRUE	unknown	0	11.809	15.134	11.997
157	TRUE	Empty	72 kDa type IV collagenase OS=Homo sapiens OX=9606 GN=MMP2 PE=1 SV=2	P08253	MMP2	74 kDa		Homo sapiens	0	7.6409	7.1218	11.247
158	TRUE	Empty	Laminin subunit beta-1 OS=Homo sapiens OX=9606 GN=LAMB1 PE=1 SV=2	P07942	LAMB1	198 kDa		Homo sapiens	0	9.0301	5.3414	8.9975
159	TRUE	Empty	Keratin, type I cytoskeletal 16 OS=Homo sapiens OX=9606 GN=KRT16 PE=1 SV=4	P08779	KRT16	51 kDa	TRUE	Homo sapiens	212.85	6.2516	16.914	5.9983
160	TRUE	Empty	Cullin-associated NEDD8-dissociated protein 1 OS=Homo sapiens OX=9606 GN=CAND1 PE=1 SV=2	Q86VP6	CAND1	136 kDa		Homo sapiens	0	5.557	8.0121	3.7489
161	TRUE	Empty	X-ray repair cross-complementing protein 5 OS=Homo sapiens OX=9606 GN=XRCC5 PE=1 SV=3	P13010	XRCC5	83 kDa		Homo sapiens	0	9.7247	4.4511	11.247
162	TRUE	Empty	Dihydropyrimidinase-related protein 3 OS=Homo sapiens OX=9606 GN=DPYSL3 PE=1 SV=1	Q14195 (+1)	DPYSL3	62 kDa	TRUE	Homo sapiens	0	9.0301	8.9023	5.9983
163	TRUE	Empty	Galectin-3-binding protein OS=Homo sapiens OX=9606 GN=LGALS3BP PE=1 SV=1	Q08380	LGALS3BP	65 kDa		Homo sapiens	0	10.419	1.7805	16.495
164	TRUE	Empty	14-3-3 protein sigma OS=Homo sapiens OX=9606 GN=SFN PE=1 SV=1	P31947	SFN	28 kDa	TRUE	Homo sapiens	0	10.419	17.805	8.2477
165	TRUE	Empty	Isoform Smooth muscle of Myosin light polypeptide 6 OS=Homo sapiens OX=9606 GN=MYL6	P60660-2	MYL6	17 kDa	TRUE	unknown	0	11.114	8.9023	10.497
166	TRUE	Empty	Calponin-3 OS=Homo sapiens OX=9606 GN=CNN3 PE=1 SV=1	Q15417	CNN3	36 kDa	TRUE	Homo sapiens	0	9.0301	8.9023	8.2477
167	TRUE	Empty	Programmed cell death 6-interacting protein OS=Homo sapiens OX=9606 GN=PDCD6IP PE=1 SV=1	Q8WUM4 (+1)	PDCD6IP	96 kDa		Homo sapiens	0	8.3355	7.1218	9.7473
168	TRUE	Empty	T-complex protein 1 subunit alpha OS=Homo sapiens OX=9606 GN=TCP1 PE=1 SV=1	P17987	TCP1	60 kDa		Homo sapiens	0	6.9462	8.0121	8.9975
169	TRUE	Empty	Follistatin-related protein 1 OS=Homo sapiens OX=9606 GN=FSTL1 PE=1 SV=1	Q12841 (+1)	FSTL1	35 kDa		Homo sapiens	0	5.557	0	7.4979
170	TRUE	Empty	Annexin A1 OS=Homo sapiens OX=9606 GN=ANXA1 PE=1 SV=2	P04083	ANXA1	39 kDa		Homo sapiens	0	8.3355	8.9023	6.7481
171	TRUE	Empty	Zyxin OS=Homo sapiens OX=9606 GN=ZYX PE=1 SV=1	Q15942	ZYX	61 kDa		Homo sapiens	0	9.0301	6.2316	7.4979
172	TRUE	Empty	Chloride intracellular channel protein 1 OS=Homo sapiens OX=9606 GN=CLIC1 PE=1 SV=4	O00299	CLIC1	27 kDa	TRUE	Homo sapiens	0	9.0301	9.7925	7.4979
173	TRUE	Empty	Tropomyosin alpha-4 chain OS=Homo sapiens OX=9606 GN=TPM4 PE=1 SV=3	P67936	TPM4	29 kDa	TRUE	Homo sapiens	0	11.809	11.573	8.9975
174	TRUE	Empty	Cystatin-C OS=Homo sapiens OX=9606 GN=CST3 PE=1 SV=1	P01034	CST3	16 kDa		Homo sapiens	0	10.419	3.5609	12.746
175	TRUE	Empty	Lupus La protein OS=Homo sapiens OX=9606 GN=SSB PE=1 SV=2	P05455	SSB	47 kDa		Homo sapiens	0	6.2516	4.4511	6.7481
176	TRUE	Empty	60S acidic ribosomal protein P2 OS=Homo sapiens OX=9606 GN=RPLP2 PE=1 SV=1	P05387	RPLP2	12 kDa	TRUE	Homo sapiens	0	7.6409	8.0121	8.9975
177	TRUE	Empty	Elongation factor 1-gamma OS=Homo sapiens OX=9606 GN=EEF1G PE=1 SV=3	P26641	EEF1G	50 kDa		Homo sapiens	0	6.2516	9.7925	8.9975
178	TRUE	Empty	T-complex protein 1 subunit zeta OS=Homo sapiens OX=9606 GN=CCT6A PE=1 SV=3	P40227	CCT6A	58 kDa	TRUE	Homo sapiens	0	5.557	8.9023	5.9983
179	TRUE	Empty	Calpain-2 catalytic subunit OS=Homo sapiens OX=9606 GN=CAPN2 PE=1 SV=6	P17655	CAPN2	80 kDa		Homo sapiens	0	7.6409	8.9023	5.2485
180	TRUE	Empty	Procollagen-lysine,2-oxoglutarate 5-dioxygenase 2 OS=Homo sapiens OX=9606 GN=PLOD2 PE=1 SV=2	O00469	PLOD2	85 kDa		Homo sapiens	0	9.0301	3.5609	8.9975
181	TRUE	Empty	Actin-related protein 2/3 complex subunit 2 OS=Homo sapiens OX=9606 GN=ARPC2 PE=1 SV=1	O15144	ARPC2	34 kDa		Homo sapiens	0	4.1677	7.1218	6.7481
182	TRUE	Empty	Polyadenylate-binding protein 1 OS=Homo sapiens OX=9606 GN=PABPC1 PE=1 SV=2	P11940	PABPC1	71 kDa	TRUE	Homo sapiens	0	7.6409	3.5609	11.247
183	TRUE	Empty	Cytosolic non-specific dipeptidase OS=Homo sapiens OX=9606 GN=CNDP2 PE=1 SV=2	Q96KP4	CNDP2	53 kDa		Homo sapiens	0	6.9462	8.9023	9.7473
184	TRUE	Empty	Vigilin OS=Homo sapiens OX=9606 GN=HDLBP PE=1 SV=2	Q00341	HDLBP	141 kDa		Homo sapiens	0	7.6409	8.9023	4.4987
185	TRUE	Empty	T-complex protein 1 subunit epsilon OS=Homo sapiens OX=9606 GN=CCT5 PE=1 SV=1	P48643	CCT5	60 kDa		Homo sapiens	0	6.9462	6.2316	6.7481
186	TRUE	Empty	Isoform 10 of Calpastatin OS=Homo sapiens OX=9606 GN=CAST	P20810-10 (+1)	CAST	82 kDa		unknown	0	9.0301	13.353	3.7489
187	TRUE	Empty	Keratin, type I cytoskeletal 17 OS=Homo sapiens OX=9606 GN=KRT17 PE=1 SV=2	Q04695	KRT17	48 kDa	TRUE	Homo sapiens	96.752	11.114	12.463	0
188	TRUE	Empty	Urokinase-type plasminogen activator OS=Homo sapiens OX=9606 GN=PLAU PE=1 SV=2	P00749 (+1)	PLAU	49 kDa		Homo sapiens	0	7.6409	0	11.247
189	TRUE	Empty	Protein SET OS=Homo sapiens OX=9606 GN=SET PE=1 SV=3	Q01105	SET	33 kDa	TRUE	Homo sapiens	0	8.3355	8.0121	5.9983
190	TRUE	Empty	14-3-3 protein beta/alpha OS=Homo sapiens OX=9606 GN=YWHAB PE=1 SV=3	P31946 (+1)	YWHAB	28 kDa	TRUE	Homo sapiens	0	13.198	16.024	9.7473
191	TRUE	Empty	Nucleosome assembly protein 1-like 1 OS=Homo sapiens OX=9606 GN=NAP1L1 PE=1 SV=1	P55209 (+1)	NAP1L1	45 kDa	TRUE	Homo sapiens	0	8.3355	5.3414	8.2477
192	TRUE	Empty	Insulin-like growth factor-binding protein 3 OS=Homo sapiens OX=9606 GN=IGFBP3 PE=1 SV=2	P17936 (+1)	IGFBP3	32 kDa		Homo sapiens	0	6.2516	2.6707	7.4979
193	TRUE	Empty	Glutaredoxin-3 OS=Homo sapiens OX=9606 GN=GLRX3 PE=1 SV=2	O76003	GLRX3	37 kDa		Homo sapiens	0	6.9462	2.6707	10.497
194	TRUE	Empty	Proteasome activator complex subunit 1 OS=Homo sapiens OX=9606 GN=PSME1 PE=1 SV=1	Q06323	PSME1	29 kDa		Homo sapiens	0	7.6409	1.7805	9.7473
195	TRUE	Empty	Hornerin OS=Homo sapiens OX=9606 GN=HRNR PE=1 SV=2	Q86YZ3	HRNR	282 kDa		Homo sapiens	58.051	2.0839	8.9023	2.2494
196	TRUE	Empty	Isoform 3 of Heterogeneous nuclear ribonucleoprotein K OS=Homo sapiens OX=9606 GN=HNRNPK	P61978-3	HNRNPK	49 kDa		unknown	0	6.9462	4.4511	8.2477
197	TRUE	Empty	T-complex protein 1 subunit eta OS=Homo sapiens OX=9606 GN=CCT7 PE=1 SV=2	Q99832	CCT7	59 kDa		Homo sapiens	0	6.2516	5.3414	6.7481
198	TRUE	Empty	Protein/nucleic acid deglycase DJ-1 OS=Homo sapiens OX=9606 GN=PARK7 PE=1 SV=2	Q99497	PARK7	20 kDa		Homo sapiens	0	5.557	4.4511	4.4987
199	TRUE	Empty	Inorganic pyrophosphatase OS=Homo sapiens OX=9606 GN=PPA1 PE=1 SV=2	Q15181	PPA1	33 kDa		Homo sapiens	0	9.0301	3.5609	9.7473
200	TRUE	Empty	Purine nucleoside phosphorylase OS=Homo sapiens OX=9606 GN=PNP PE=1 SV=2	P00491	PNP	32 kDa		Homo sapiens	0	6.2516	12.463	5.2485
201	TRUE	Empty	Reticulocalbin-1 OS=Homo sapiens OX=9606 GN=RCN1 PE=1 SV=1	Q15293	RCN1	39 kDa		Homo sapiens	0	6.9462	8.0121	4.4987
202	TRUE	Empty	High mobility group protein B1 OS=Homo sapiens OX=9606 GN=HMGB1 PE=1 SV=3	P09429	HMGB1	25 kDa	TRUE	Homo sapiens	38.701	6.2516	1.7805	6.7481
203	TRUE	Empty	40S ribosomal protein SA OS=Homo sapiens OX=9606 GN=RPSA PE=1 SV=4	P08865	RPSA	33 kDa		Homo sapiens	0	6.2516	6.2316	5.9983
204	TRUE	Empty	Prosaposin OS=Homo sapiens OX=9606 GN=PSAP PE=1 SV=2	P07602	PSAP	58 kDa		Homo sapiens	0	6.9462	0	6.7481
205	TRUE	Empty	Protein S100-A6 OS=Homo sapiens OX=9606 GN=S100A6 PE=1 SV=1	P06703	S100A6	10 kDa		Homo sapiens	0	7.6409	4.4511	8.2477
206	TRUE	Empty	Bifunctional purine biosynthesis protein PURH OS=Homo sapiens OX=9606 GN=ATIC PE=1 SV=3	P31939	ATIC	65 kDa		Homo sapiens	0	7.6409	7.1218	7.4979
207	TRUE	Empty	Ubiquitin carboxyl-terminal hydrolase isozyme L1 OS=Homo sapiens OX=9606 GN=UCHL1 PE=1 SV=2	P09936	UCHL1	25 kDa		Homo sapiens	0	8.3355	1.7805	8.9975
208	TRUE	Empty	Stress-induced-phosphoprotein 1 OS=Homo sapiens OX=9606 GN=STIP1 PE=1 SV=1	P31948 (+1)	STIP1	63 kDa		Homo sapiens	0	7.6409	0	5.2485
209	TRUE	Empty	26S proteasome non-ATPase regulatory subunit 2 OS=Homo sapiens OX=9606 GN=PSMD2 PE=1 SV=3	Q13200	PSMD2	100 kDa		Homo sapiens	0	5.557	7.1218	6.7481
210	TRUE	Empty	Isoform 2 of Septin-2 OS=Homo sapiens OX=9606 GN=SEPT2	Q15019-2	2022-09-02	45 kDa	TRUE	unknown	0	8.3355	10.683	4.4987
211	TRUE	Empty	Collagen alpha-1(V) chain OS=Homo sapiens OX=9606 GN=COL5A1 PE=1 SV=3	P20908	COL5A1	184 kDa		Homo sapiens	0	6.9462	9.7925	0
212	TRUE	Empty	Peroxiredoxin-5, mitochondrial OS=Homo sapiens OX=9606 GN=PRDX5 PE=1 SV=4	P30044 (+1)	PRDX5	22 kDa		Homo sapiens	0	4.8624	6.2316	5.9983
213	TRUE	Empty	Spliceosome RNA helicase DDX39B OS=Homo sapiens OX=9606 GN=DDX39B PE=1 SV=1	Q13838 (+1)	DDX39B	49 kDa		Homo sapiens	0	4.1677	5.3414	4.4987
214	TRUE	Empty	Major vault protein OS=Homo sapiens OX=9606 GN=MVP PE=1 SV=4	Q14764	MVP	99 kDa		Homo sapiens	0	7.6409	6.2316	5.9983
215	TRUE	Empty	Heat shock protein 105 kDa OS=Homo sapiens OX=9606 GN=HSPH1 PE=1 SV=1	Q92598 (+2)	HSPH1	97 kDa		Homo sapiens	0	7.6409	3.5609	5.9983
216	TRUE	Empty	Phosphatidylethanolamine-binding protein 1 OS=Homo sapiens OX=9606 GN=PEBP1 PE=1 SV=3	P30086	PEBP1	21 kDa		Homo sapiens	38.701	4.8624	8.9023	5.2485
217	TRUE	Empty	Perilipin-3 OS=Homo sapiens OX=9606 GN=PLIN3 PE=1 SV=3	O60664 (+1)	PLIN3	47 kDa		Homo sapiens	0	9.7247	4.4511	5.9983
218	TRUE	Empty	ATP-dependent RNA helicase DDX1 OS=Homo sapiens OX=9606 GN=DDX1 PE=1 SV=2	Q92499	DDX1	82 kDa		Homo sapiens	0	6.2516	3.5609	4.4987
219	TRUE	Empty	Rho GDP-dissociation inhibitor 1 OS=Homo sapiens OX=9606 GN=ARHGDIA PE=1 SV=3	P52565	ARHGDIA	23 kDa		Homo sapiens	0	6.2516	8.9023	6.7481
220	TRUE	Empty	Dipeptidyl peptidase 3 OS=Homo sapiens OX=9606 GN=DPP3 PE=1 SV=2	Q9NY33	DPP3	83 kDa		Homo sapiens	0	6.2516	8.9023	5.9983
221	TRUE	Empty	Coatomer subunit gamma-1 OS=Homo sapiens OX=9606 GN=COPG1 PE=1 SV=1	Q9Y678	COPG1	98 kDa		Homo sapiens	0	4.8624	6.2316	4.4987
222	TRUE	Empty	Beta-1,4-galactosyltransferase 1 OS=Homo sapiens OX=9606 GN=B4GALT1 PE=1 SV=5	P15291 (+1)	B4GALT1	44 kDa		Homo sapiens	0	7.6409	3.5609	8.2477
223	TRUE	Empty	Collagen alpha-1(IV) chain OS=Homo sapiens OX=9606 GN=COL4A1 PE=1 SV=4	P02462	COL4A1	161 kDa		Homo sapiens	0	4.8624	0	9.7473
224	TRUE	Empty	Tubulin beta-3 chain OS=Homo sapiens OX=9606 GN=TUBB3 PE=1 SV=2	Q13509	TUBB3	50 kDa	TRUE	Homo sapiens	0	22.228	30.268	24.743
225	TRUE	Empty	Myosin regulatory light chain 12B OS=Homo sapiens OX=9606 GN=MYL12B PE=1 SV=2	O14950	MYL12B	20 kDa	TRUE	Homo sapiens	0	6.9462	5.3414	7.4979
226	TRUE	Empty	Plastin-2 OS=Homo sapiens OX=9606 GN=LCP1 PE=1 SV=6	P13796	LCP1	70 kDa	TRUE	Homo sapiens	0	10.419	9.7925	6.7481
227	TRUE	Empty	Heterogeneous nuclear ribonucleoprotein L OS=Homo sapiens OX=9606 GN=HNRNPL PE=1 SV=2	P14866	HNRNPL	64 kDa		Homo sapiens	0	6.2516	3.5609	7.4979
228	TRUE	Empty	40S ribosomal protein S3 OS=Homo sapiens OX=9606 GN=RPS3 PE=1 SV=2	P23396	RPS3	27 kDa		Homo sapiens	0	4.1677	8.0121	5.2485
229	TRUE	Empty	Importin subunit beta-1 OS=Homo sapiens OX=9606 GN=KPNB1 PE=1 SV=2	Q14974	KPNB1	97 kDa		Homo sapiens	0	4.8624	1.7805	6.7481
230	TRUE	Empty	Synaptic vesicle membrane protein VAT-1 homolog OS=Homo sapiens OX=9606 GN=VAT1 PE=1 SV=2	Q99536	VAT1	42 kDa		Homo sapiens	0	5.557	6.2316	5.2485
231	TRUE	Empty	Signal transducer and activator of transcription 1-alpha/beta OS=Homo sapiens OX=9606 GN=STAT1 PE=1 SV=2	P42224	STAT1	87 kDa		Homo sapiens	0	6.9462	0	10.497
232	TRUE	Empty	Epidermal growth factor receptor kinase substrate 8-like protein 2 OS=Homo sapiens OX=9606 GN=EPS8L2 PE=1 SV=2	Q9H6S3	EPS8L2	81 kDa		Homo sapiens	0	6.9462	4.4511	5.2485
233	TRUE	Empty	Calpain small subunit 1 OS=Homo sapiens OX=9606 GN=CAPNS1 PE=1 SV=1	P04632	CAPNS1	28 kDa		Homo sapiens	0	4.8624	5.3414	2.9992
234	TRUE	Empty	Translationally-controlled tumor protein OS=Homo sapiens OX=9606 GN=TPT1 PE=1 SV=1	P13693	TPT1	20 kDa		Homo sapiens	0	6.2516	6.2316	5.2485
235	TRUE	Empty	Transaldolase OS=Homo sapiens OX=9606 GN=TALDO1 PE=1 SV=2	P37837	TALDO1	38 kDa		Homo sapiens	0	4.1677	4.4511	3.7489
236	TRUE	Empty	Isoform Short of Ubiquitin carboxyl-terminal hydrolase 5 OS=Homo sapiens OX=9606 GN=USP5	P45974-2	USP5	93 kDa		unknown	0	7.6409	4.4511	4.4987
237	TRUE	Empty	Thymosin beta-4 OS=Homo sapiens OX=9606 GN=TMSB4X PE=1 SV=2	P62328	TMSB4X	5 kDa		Homo sapiens	0	7.6409	8.9023	6.7481
238	TRUE	Empty	Heterogeneous nuclear ribonucleoprotein H OS=Homo sapiens OX=9606 GN=HNRNPH1 PE=1 SV=4	P31943	HNRNPH1	49 kDa	TRUE	Homo sapiens	0	7.6409	1.7805	8.2477
239	TRUE	Empty	Isoform 3 of Thioredoxin reductase 1, cytoplasmic OS=Homo sapiens OX=9606 GN=TXNRD1	Q16881-3	TXNRD1	66 kDa		unknown	0	4.8624	1.7805	6.7481
240	TRUE	Empty	Collagen alpha-1(XII) chain OS=Homo sapiens OX=9606 GN=COL12A1 PE=1 SV=2	Q99715	COL12A1	333 kDa		Homo sapiens	29.026	2.7785	0	8.9975
241	TRUE	Empty	Heterogeneous nuclear ribonucleoprotein A1 OS=Homo sapiens OX=9606 GN=HNRNPA1 PE=1 SV=5	P09651 (+2)	HNRNPA1	39 kDa	TRUE	Homo sapiens	0	6.9462	3.5609	6.7481
242	TRUE	Empty	Isoform 2 of F-actin-capping protein subunit beta OS=Homo sapiens OX=9606 GN=CAPZB	P47756-2	CAPZB	31 kDa		unknown	0	8.3355	7.1218	3.7489
243	TRUE	Empty	Arginine--tRNA ligase, cytoplasmic OS=Homo sapiens OX=9606 GN=RARS PE=1 SV=2	P54136 (+1)	RARS	75 kDa		Homo sapiens	0	4.1677	8.9023	3.7489
244	TRUE	Empty	Cytochrome c OS=Homo sapiens OX=9606 GN=CYCS PE=1 SV=2	P99999	CYCS	12 kDa		Homo sapiens	0	6.2516	6.2316	4.4987
245	TRUE	Empty	Ras GTPase-activating protein-binding protein 1 OS=Homo sapiens OX=9606 GN=G3BP1 PE=1 SV=1	Q13283	G3BP1	52 kDa		Homo sapiens	0	4.1677	4.4511	3.7489
246	TRUE	Empty	LIM and SH3 domain protein 1 OS=Homo sapiens OX=9606 GN=LASP1 PE=1 SV=2	Q14847	LASP1	30 kDa		Homo sapiens	0	6.9462	8.0121	3.7489
247	TRUE	Empty	EH domain-containing protein 1 OS=Homo sapiens OX=9606 GN=EHD1 PE=1 SV=2	Q9H4M9	EHD1	61 kDa	TRUE	Homo sapiens	0	6.9462	3.5609	2.9992
248	TRUE	Empty	PDZ and LIM domain protein 5 OS=Homo sapiens OX=9606 GN=PDLIM5 PE=1 SV=5	Q96HC4	PDLIM5	64 kDa		Homo sapiens	0	6.2516	6.2316	2.2494
249	TRUE	Empty	Tenascin-X OS=Homo sapiens OX=9606 GN=TNXB PE=1 SV=4	P22105 (+2)	TNXB	458 kDa		Homo sapiens	0	4.1677	8.0121	0
250	TRUE	Empty	Isoform 4 of Microtubule-actin cross-linking factor 1, isoforms 1/2/3/5 OS=Homo sapiens OX=9606 GN=MACF1	Q9UPN3-5	MACF1	670 kDa	TRUE	unknown	0	2.7785	0	4.4987
251	TRUE	Empty	60 kDa heat shock protein, mitochondrial OS=Homo sapiens OX=9606 GN=HSPD1 PE=1 SV=2	P10809	HSPD1	61 kDa		Homo sapiens	0	5.557	0	8.2477
252	TRUE	Empty	Serpin B6 OS=Homo sapiens OX=9606 GN=SERPINB6 PE=1 SV=3	P35237	SERPINB6	43 kDa		Homo sapiens	0	4.1677	8.9023	2.9992
253	TRUE	Empty	Hepatoma-derived growth factor OS=Homo sapiens OX=9606 GN=HDGF PE=1 SV=1	P51858	HDGF	27 kDa	TRUE	Homo sapiens	0	4.8624	8.0121	4.4987
254	TRUE	Empty	Thioredoxin domain-containing protein 5 OS=Homo sapiens OX=9606 GN=TXNDC5 PE=1 SV=2	Q8NBS9	TXNDC5	48 kDa		Homo sapiens	0	4.1677	6.2316	3.7489
255	TRUE	Empty	Isoform IIa of Prolyl 4-hydroxylase subunit alpha-2 OS=Homo sapiens OX=9606 GN=P4HA2	O15460-2	P4HA2	61 kDa		unknown	0	6.9462	7.1218	5.2485
256	TRUE	Empty	Glucosidase 2 subunit beta OS=Homo sapiens OX=9606 GN=PRKCSH PE=1 SV=2	P14314 (+1)	PRKCSH	59 kDa		Homo sapiens	0	4.8624	6.2316	2.9992
257	TRUE	Empty	Phosphoglucomutase-1 OS=Homo sapiens OX=9606 GN=PGM1 PE=1 SV=3	P36871	PGM1	61 kDa		Homo sapiens	0	4.8624	10.683	2.9992
258	TRUE	Empty	Hexokinase-1 OS=Homo sapiens OX=9606 GN=HK1 PE=1 SV=3	P19367	HK1	102 kDa		Homo sapiens	0	2.7785	6.2316	0
259	TRUE	Empty	Eukaryotic translation initiation factor 3 subunit A OS=Homo sapiens OX=9606 GN=EIF3A PE=1 SV=1	Q14152	EIF3A	167 kDa		Homo sapiens	0	2.7785	4.4511	4.4987
260	TRUE	Empty	Malate dehydrogenase, cytoplasmic OS=Homo sapiens OX=9606 GN=MDH1 PE=1 SV=4	P40925 (+1)	MDH1	36 kDa		Homo sapiens	0	4.8624	6.2316	2.2494
261	TRUE	Empty	Protein CDV3 homolog OS=Homo sapiens OX=9606 GN=CDV3 PE=1 SV=1	Q9UKY7	CDV3	27 kDa		Homo sapiens	0	4.8624	4.4511	3.7489
262	TRUE	Empty	Isoform 2 of Actin-related protein 2 OS=Homo sapiens OX=9606 GN=ACTR2	P61160-2	ACTR2	45 kDa		unknown	0	5.557	7.1218	5.9983
263	TRUE	Empty	T-complex protein 1 subunit gamma OS=Homo sapiens OX=9606 GN=CCT3 PE=1 SV=4	P49368	CCT3	61 kDa		Homo sapiens	0	4.8624	5.3414	2.9992
264	TRUE	Empty	Alpha-centractin OS=Homo sapiens OX=9606 GN=ACTR1A PE=1 SV=1	P61163	ACTR1A	43 kDa		Homo sapiens	0	4.8624	4.4511	2.9992
265	TRUE	Empty	Thymosin beta-10 OS=Homo sapiens OX=9606 GN=TMSB10 PE=1 SV=2	P63313	TMSB10	5 kDa		Homo sapiens	0	6.2516	5.3414	0
266	TRUE	Empty	60S acidic ribosomal protein P0 OS=Homo sapiens OX=9606 GN=RPLP0 PE=1 SV=1	P05388	RPLP0	34 kDa		Homo sapiens	0	4.1677	4.4511	7.4979
267	TRUE	Empty	Hemoglobin subunit alpha OS=Homo sapiens OX=9606 GN=HBA1 PE=1 SV=2	P69905	HBA1	15 kDa		Homo sapiens	0	4.8624	1.7805	5.9983
268	TRUE	Empty	T-complex protein 1 subunit delta OS=Homo sapiens OX=9606 GN=CCT4 PE=1 SV=4	P50991	CCT4	58 kDa		Homo sapiens	0	4.8624	5.3414	5.2485
269	TRUE	Empty	Isoform 2 of 6-phosphogluconate dehydrogenase, decarboxylating OS=Homo sapiens OX=9606 GN=PGD	P52209-2	PGD	52 kDa		unknown	0	7.6409	2.6707	5.9983
270	TRUE	Empty	Serine/arginine-rich splicing factor 1 OS=Homo sapiens OX=9606 GN=SRSF1 PE=1 SV=2	Q07955 (+2)	SRSF1	28 kDa		Homo sapiens	0	2.7785	2.6707	4.4987
271	TRUE	Empty	Isoform 7 of Interleukin enhancer-binding factor 3 OS=Homo sapiens OX=9606 GN=ILF3	Q12906-7	ILF3	96 kDa		unknown	0	4.8624	3.5609	4.4987
272	TRUE	Empty	Septin-9 OS=Homo sapiens OX=9606 GN=SEPT9 PE=1 SV=2	Q9UHD8 (+3)	2022-09-09	65 kDa	TRUE	Homo sapiens	0	4.1677	6.2316	5.2485
273	TRUE	Empty	40S ribosomal protein S12 OS=Homo sapiens OX=9606 GN=RPS12 PE=1 SV=3	P25398	RPS12	15 kDa		Homo sapiens	0	6.2516	7.1218	5.9983
274	TRUE	Empty	Importin-5 OS=Homo sapiens OX=9606 GN=IPO5 PE=1 SV=4	O00410	IPO5	124 kDa	TRUE	Homo sapiens	0	4.1677	0	5.9983
275	TRUE	Empty	Alanine--tRNA ligase, cytoplasmic OS=Homo sapiens OX=9606 GN=AARS PE=1 SV=2	P49588	AARS	107 kDa		Homo sapiens	0	6.2516	0	8.2477
276	TRUE	Empty	Collagen alpha-1(XVIII) chain OS=Homo sapiens OX=9606 GN=COL18A1 PE=1 SV=5	P39060 (+2)	COL18A1	178 kDa		Homo sapiens	0	4.1677	0	9.7473
277	TRUE	Empty	Histone H2B type 1-D OS=Homo sapiens OX=9606 GN=HIST1H2BD PE=1 SV=2	P58876	HIST1H2BD	14 kDa		Homo sapiens	67.726	4.1677	2.6707	2.2494
278	TRUE	Empty	Calpain-1 catalytic subunit OS=Homo sapiens OX=9606 GN=CAPN1 PE=1 SV=1	P07384	CAPN1	82 kDa		Homo sapiens	0	1.3892	7.1218	2.9992
279	TRUE	Empty	Semaphorin-7A OS=Homo sapiens OX=9606 GN=SEMA7A PE=1 SV=1	O75326 (+1)	SEMA7A	75 kDa		Homo sapiens	0	4.8624	4.4511	5.9983
280	TRUE	Empty	Adenosylhomocysteinase OS=Homo sapiens OX=9606 GN=AHCY PE=1 SV=4	P23526	AHCY	48 kDa		Homo sapiens	0	4.8624	7.1218	4.4987
281	TRUE	Empty	Vasodilator-stimulated phosphoprotein OS=Homo sapiens OX=9606 GN=VASP PE=1 SV=3	P50552	VASP	40 kDa		Homo sapiens	0	6.9462	2.6707	6.7481
282	TRUE	Empty	Lactotransferrin OS=Homo sapiens OX=9606 GN=LTF PE=1 SV=6	P02788 (+1)	LTF	78 kDa	TRUE	Homo sapiens	0	2.0839	0	13.496
283	TRUE	Empty	Dystroglycan OS=Homo sapiens OX=9606 GN=DAG1 PE=1 SV=2	Q14118	DAG1	97 kDa		Homo sapiens	0	6.2516	0	6.7481
284	TRUE	Empty	Collagen alpha-1(III) chain OS=Homo sapiens OX=9606 GN=COL3A1 PE=1 SV=4	P02461	COL3A1	139 kDa	TRUE	Homo sapiens	0	6.9462	6.2316	0
285	TRUE	Empty	Tubulin beta-6 chain OS=Homo sapiens OX=9606 GN=TUBB6 PE=1 SV=1	Q9BUF5	TUBB6	50 kDa	TRUE	Homo sapiens	0	14.587	20.475	17.995
286	TRUE	Empty	Malate dehydrogenase, mitochondrial OS=Homo sapiens OX=9606 GN=MDH2 PE=1 SV=3	P40926	MDH2	36 kDa		Homo sapiens	0	5.557	2.6707	5.9983
287	TRUE	Empty	CD2-associated protein OS=Homo sapiens OX=9606 GN=CD2AP PE=1 SV=1	Q9Y5K6	CD2AP	71 kDa		Homo sapiens	0	5.557	0	2.2494
288	TRUE	Empty	Bone morphogenetic protein 1 OS=Homo sapiens OX=9606 GN=BMP1 PE=1 SV=2	P13497	BMP1	111 kDa		Homo sapiens	0	4.1677	2.6707	5.2485
289	TRUE	Empty	26S proteasome regulatory subunit 6B OS=Homo sapiens OX=9606 GN=PSMC4 PE=1 SV=2	P43686 (+1)	PSMC4	47 kDa		Homo sapiens	0	4.8624	5.3414	5.9983
290	TRUE	Empty	Adenylate kinase 2, mitochondrial OS=Homo sapiens OX=9606 GN=AK2 PE=1 SV=2	P54819 (+1)	AK2	26 kDa		Homo sapiens	0	4.8624	3.5609	5.2485
291	TRUE	Empty	14-3-3 protein gamma OS=Homo sapiens OX=9606 GN=YWHAG PE=1 SV=2	P61981	YWHAG	28 kDa	TRUE	Homo sapiens	0	11.809	12.463	11.247
292	TRUE	Empty	Dickkopf-related protein 3 OS=Homo sapiens OX=9606 GN=DKK3 PE=1 SV=2	Q9UBP4	DKK3	38 kDa		Homo sapiens	0	4.1677	4.4511	5.2485
293	TRUE	Empty	Proliferation-associated protein 2G4 OS=Homo sapiens OX=9606 GN=PA2G4 PE=1 SV=3	Q9UQ80	PA2G4	44 kDa		Homo sapiens	0	3.4731	3.5609	5.2485
294	TRUE	Empty	Rho GTPase-activating protein 1 OS=Homo sapiens OX=9606 GN=ARHGAP1 PE=1 SV=1	Q07960	ARHGAP1	50 kDa		Homo sapiens	0	5.557	8.9023	2.2494
295	TRUE	Empty	Inhibin beta A chain OS=Homo sapiens OX=9606 GN=INHBA PE=1 SV=2	P08476	INHBA	47 kDa		Homo sapiens	0	4.1677	0	5.9983
296	TRUE	Empty	Aldehyde dehydrogenase family 1 member A3 OS=Homo sapiens OX=9606 GN=ALDH1A3 PE=1 SV=2	P47895	ALDH1A3	56 kDa		Homo sapiens	0	2.0839	8.9023	0
297	TRUE	Empty	Serpin B5 OS=Homo sapiens OX=9606 GN=SERPINB5 PE=1 SV=2	P36952	SERPINB5	42 kDa		Homo sapiens	0	2.0839	8.0121	0
298	TRUE	Empty	Testin OS=Homo sapiens OX=9606 GN=TES PE=1 SV=1	Q9UGI8	TES	48 kDa		Homo sapiens	0	4.8624	8.0121	0
299	TRUE	Empty	Anterior gradient protein 2 homolog OS=Homo sapiens OX=9606 GN=AGR2 PE=1 SV=1	O95994	AGR2	20 kDa	TRUE	Homo sapiens	0	6.2516	10.683	0
300	TRUE	Empty	A-kinase anchor protein 12 OS=Homo sapiens OX=9606 GN=AKAP12 PE=1 SV=4	Q02952 (+2)	AKAP12	191 kDa		Homo sapiens	0	7.6409	0	8.2477
301	TRUE	Empty	Polyubiquitin-B OS=Homo sapiens OX=9606 GN=UBB PE=1 SV=1	P0CG47 (+3)	UBB	26 kDa		Homo sapiens	0	1.3892	2.6707	1.4996
302	TRUE	Empty	60S ribosomal protein L10a OS=Homo sapiens OX=9606 GN=RPL10A PE=1 SV=2	P62906	RPL10A	25 kDa		Homo sapiens	0	3.4731	5.3414	3.7489
303	TRUE	Empty	T-complex protein 1 subunit theta OS=Homo sapiens OX=9606 GN=CCT8 PE=1 SV=4	P50990	CCT8	60 kDa		Homo sapiens	0	1.3892	2.6707	2.9992
304	TRUE	Empty	AP-2 complex subunit beta OS=Homo sapiens OX=9606 GN=AP2B1 PE=1 SV=1	P63010 (+2)	AP2B1	105 kDa	TRUE	Homo sapiens	0	1.3892	8.9023	0
305	TRUE	Empty	Coatomer subunit alpha OS=Homo sapiens OX=9606 GN=COPA PE=1 SV=2	P53621 (+1)	COPA	138 kDa		Homo sapiens	0	2.0839	7.1218	2.2494
306	TRUE	Empty	Dynactin subunit 2 OS=Homo sapiens OX=9606 GN=DCTN2 PE=1 SV=4	Q13561 (+2)	DCTN2	44 kDa		Homo sapiens	0	3.4731	5.3414	3.7489
307	TRUE	Empty	Insulin-like growth factor-binding protein 2 OS=Homo sapiens OX=9606 GN=IGFBP2 PE=1 SV=2	P18065	IGFBP2	35 kDa		Homo sapiens	0	5.557	0	6.7481
308	TRUE	Empty	Endoplasmic reticulum resident protein 29 OS=Homo sapiens OX=9606 GN=ERP29 PE=1 SV=4	P30040	ERP29	29 kDa		Homo sapiens	0	4.1677	3.5609	5.2485
309	TRUE	Empty	Carbonyl reductase [NADPH] 1 OS=Homo sapiens OX=9606 GN=CBR1 PE=1 SV=3	P16152	CBR1	30 kDa		Homo sapiens	0	3.4731	4.4511	3.7489
310	TRUE	Empty	Polypeptide N-acetylgalactosaminyltransferase 2 OS=Homo sapiens OX=9606 GN=GALNT2 PE=1 SV=1	Q10471	GALNT2	65 kDa		Homo sapiens	0	5.557	2.6707	5.2485
311	TRUE	Empty	Elongation factor 1-beta OS=Homo sapiens OX=9606 GN=EEF1B2 PE=1 SV=3	P24534	EEF1B2	25 kDa		Homo sapiens	0	3.4731	4.4511	3.7489
312	TRUE	Empty	Peptidyl-prolyl cis-trans isomerase FKBP10 OS=Homo sapiens OX=9606 GN=FKBP10 PE=1 SV=1	Q96AY3	FKBP10	64 kDa		Homo sapiens	0	4.8624	8.0121	1.4996
313	TRUE	Empty	Procollagen-lysine,2-oxoglutarate 5-dioxygenase 3 OS=Homo sapiens OX=9606 GN=PLOD3 PE=1 SV=1	O60568	PLOD3	85 kDa		Homo sapiens	0	2.0839	3.5609	2.2494
314	TRUE	Empty	AP-2 complex subunit alpha-1 OS=Homo sapiens OX=9606 GN=AP2A1 PE=1 SV=3	O95782 (+1)	AP2A1	108 kDa	TRUE	Homo sapiens	0	3.4731	2.6707	3.7489
315	TRUE	Empty	Myristoylated alanine-rich C-kinase substrate OS=Homo sapiens OX=9606 GN=MARCKS PE=1 SV=4	P29966	MARCKS	32 kDa		Homo sapiens	0	4.1677	4.4511	4.4987
316	TRUE	Empty	UMP-CMP kinase OS=Homo sapiens OX=9606 GN=CMPK1 PE=1 SV=3	P30085	CMPK1	22 kDa		Homo sapiens	0	4.8624	3.5609	4.4987
317	TRUE	Empty	Coatomer subunit beta' OS=Homo sapiens OX=9606 GN=COPB2 PE=1 SV=2	P35606 (+1)	COPB2	102 kDa		Homo sapiens	0	2.0839	6.2316	2.2494
318	TRUE	Empty	UV excision repair protein RAD23 homolog B OS=Homo sapiens OX=9606 GN=RAD23B PE=1 SV=1	P54727	RAD23B	43 kDa		Homo sapiens	0	4.8624	3.5609	5.2485
319	TRUE	Empty	Ubiquitin-conjugating enzyme E2 L3 OS=Homo sapiens OX=9606 GN=UBE2L3 PE=1 SV=1	P68036 (+1)	UBE2L3	18 kDa		Homo sapiens	0	4.8624	6.2316	3.7489
320	TRUE	Empty	Astrocytic phosphoprotein PEA-15 OS=Homo sapiens OX=9606 GN=PEA15 PE=1 SV=2	Q15121	PEA15	15 kDa		Homo sapiens	0	4.1677	6.2316	4.4987
321	TRUE	Empty	Kinesin-1 heavy chain OS=Homo sapiens OX=9606 GN=KIF5B PE=1 SV=1	P33176	KIF5B	110 kDa		Homo sapiens	0	3.4731	4.4511	1.4996
322	TRUE	Empty	Insulin-like growth factor-binding protein 5 OS=Homo sapiens OX=9606 GN=IGFBP5 PE=1 SV=1	P24593	IGFBP5	31 kDa		Homo sapiens	0	6.9462	8.0121	0
323	TRUE	Empty	Chloride intracellular channel protein 3 OS=Homo sapiens OX=9606 GN=CLIC3 PE=1 SV=2	O95833	CLIC3	27 kDa		Homo sapiens	0	4.8624	10.683	0
324	TRUE	Empty	Thioredoxin OS=Homo sapiens OX=9606 GN=TXN PE=1 SV=3	P10599	TXN	12 kDa		Homo sapiens	0	3.4731	1.7805	2.2494
325	TRUE	Empty	60S ribosomal protein L6 OS=Homo sapiens OX=9606 GN=RPL6 PE=1 SV=3	Q02878	RPL6	33 kDa		Homo sapiens	0	4.1677	4.4511	2.9992
326	TRUE	Empty	Carboxypeptidase A4 OS=Homo sapiens OX=9606 GN=CPA4 PE=1 SV=2	Q9UI42	CPA4	47 kDa		Homo sapiens	0	3.4731	2.6707	4.4987
327	TRUE	Empty	Heterogeneous nuclear ribonucleoprotein D0 OS=Homo sapiens OX=9606 GN=HNRNPD PE=1 SV=1	Q14103 (+3)	HNRNPD	38 kDa	TRUE	Homo sapiens	0	3.4731	3.5609	4.4987
328	TRUE	Empty	Nascent polypeptide-associated complex subunit alpha, muscle-specific form OS=Homo sapiens OX=9606 GN=NACA PE=1 SV=1	E9PAV3	NACA	205 kDa		Homo sapiens	0	4.1677	5.3414	5.2485
329	TRUE	Empty	26S proteasome non-ATPase regulatory subunit 1 OS=Homo sapiens OX=9606 GN=PSMD1 PE=1 SV=2	Q99460 (+1)	PSMD1	106 kDa		Homo sapiens	0	2.0839	4.4511	4.4987
330	TRUE	Empty	Glutamine--fructose-6-phosphate aminotransferase [isomerizing] 1 OS=Homo sapiens OX=9606 GN=GFPT1 PE=1 SV=3	Q06210 (+1)	GFPT1	79 kDa		Homo sapiens	0	0	3.5609	1.4996
331	TRUE	Empty	Testican-1 OS=Homo sapiens OX=9606 GN=SPOCK1 PE=1 SV=1	Q08629	SPOCK1	49 kDa		Homo sapiens	0	2.7785	0	5.2485
332	TRUE	Empty	Splicing factor, proline- and glutamine-rich OS=Homo sapiens OX=9606 GN=SFPQ PE=1 SV=2	P23246	SFPQ	76 kDa	TRUE	Homo sapiens	0	4.8624	0	5.2485
333	TRUE	Empty	Cystatin-B OS=Homo sapiens OX=9606 GN=CSTB PE=1 SV=2	P04080	CSTB	11 kDa		Homo sapiens	0	4.8624	4.4511	2.9992
334	TRUE	Empty	Valine--tRNA ligase OS=Homo sapiens OX=9606 GN=VARS PE=1 SV=4	P26640	VARS	140 kDa		Homo sapiens	0	6.2516	2.6707	2.9992
335	TRUE	Empty	ATP-dependent 6-phosphofructokinase, platelet type OS=Homo sapiens OX=9606 GN=PFKP PE=1 SV=2	Q01813	PFKP	86 kDa		Homo sapiens	0	2.0839	3.5609	2.9992
336	TRUE	Empty	Coronin-1C OS=Homo sapiens OX=9606 GN=CORO1C PE=1 SV=1	Q9ULV4 (+2)	CORO1C	53 kDa		Homo sapiens	0	5.557	5.3414	2.9992
337	TRUE	Empty	Histidine--tRNA ligase, cytoplasmic OS=Homo sapiens OX=9606 GN=HARS PE=1 SV=2	P12081 (+1)	HARS	57 kDa		Homo sapiens	0	1.3892	3.5609	2.9992
338	TRUE	Empty	Prolyl 4-hydroxylase subunit alpha-1 OS=Homo sapiens OX=9606 GN=P4HA1 PE=1 SV=2	P13674	P4HA1	61 kDa		Homo sapiens	0	3.4731	6.2316	1.4996
339	TRUE	Empty	Latent-transforming growth factor beta-binding protein 2 OS=Homo sapiens OX=9606 GN=LTBP2 PE=1 SV=3	Q14767	LTBP2	195 kDa		Homo sapiens	0	4.8624	0	2.9992
340	TRUE	Empty	Isoform 3 of Poly(rC)-binding protein 2 OS=Homo sapiens OX=9606 GN=PCBP2	Q15366-3 (+1)	PCBP2	38 kDa	TRUE	unknown	0	4.1677	0	5.2485
341	TRUE	Empty	Acidic leucine-rich nuclear phosphoprotein 32 family member A OS=Homo sapiens OX=9606 GN=ANP32A PE=1 SV=1	P39687	ANP32A	29 kDa	TRUE	Homo sapiens	0	3.4731	1.7805	3.7489
342	TRUE	Empty	Serine/threonine-protein kinase PAK 2 OS=Homo sapiens OX=9606 GN=PAK2 PE=1 SV=3	Q13177	PAK2	58 kDa		Homo sapiens	0	4.1677	3.5609	2.9992
343	TRUE	Empty	Acylamino-acid-releasing enzyme OS=Homo sapiens OX=9606 GN=APEH PE=1 SV=4	P13798	APEH	81 kDa		Homo sapiens	0	2.7785	2.6707	2.9992
344	TRUE	Empty	Metalloproteinase inhibitor 2 OS=Homo sapiens OX=9606 GN=TIMP2 PE=1 SV=2	P16035	TIMP2	24 kDa		Homo sapiens	0	4.1677	3.5609	3.7489
345	TRUE	Empty	26S proteasome regulatory subunit 6A OS=Homo sapiens OX=9606 GN=PSMC3 PE=1 SV=3	P17980	PSMC3	49 kDa		Homo sapiens	0	4.1677	5.3414	5.2485
346	TRUE	Empty	Threonine--tRNA ligase, cytoplasmic OS=Homo sapiens OX=9606 GN=TARS PE=1 SV=3	P26639 (+1)	TARS	83 kDa		Homo sapiens	0	2.7785	5.3414	2.2494
347	TRUE	Empty	Spermine synthase OS=Homo sapiens OX=9606 GN=SMS PE=1 SV=2	P52788	SMS	41 kDa		Homo sapiens	0	4.1677	5.3414	5.2485
348	TRUE	Empty	Ubiquitin-conjugating enzyme E2 N OS=Homo sapiens OX=9606 GN=UBE2N PE=1 SV=1	P61088	UBE2N	17 kDa		Homo sapiens	0	3.4731	2.6707	3.7489
349	TRUE	Empty	Interleukin enhancer-binding factor 2 OS=Homo sapiens OX=9606 GN=ILF2 PE=1 SV=2	Q12905	ILF2	43 kDa		Homo sapiens	0	4.8624	4.4511	5.2485
350	TRUE	Empty	Src substrate cortactin OS=Homo sapiens OX=9606 GN=CTTN PE=1 SV=2	Q14247 (+1)	CTTN	62 kDa		Homo sapiens	0	4.1677	5.3414	2.9992
351	TRUE	Empty	Cysteine and glycine-rich protein 1 OS=Homo sapiens OX=9606 GN=CSRP1 PE=1 SV=3	P21291	CSRP1	21 kDa		Homo sapiens	0	5.557	5.3414	2.2494
352	TRUE	Empty	Proteasome activator complex subunit 2 OS=Homo sapiens OX=9606 GN=PSME2 PE=1 SV=4	Q9UL46	PSME2	27 kDa		Homo sapiens	0	2.7785	1.7805	5.9983
353	TRUE	Empty	Quinone oxidoreductase PIG3 OS=Homo sapiens OX=9606 GN=TP53I3 PE=1 SV=2	Q53FA7	TP53I3	36 kDa		Homo sapiens	0	4.8624	7.1218	0
354	TRUE	Empty	Dihydropyrimidinase-related protein 2 OS=Homo sapiens OX=9606 GN=DPYSL2 PE=1 SV=1	Q16555	DPYSL2	62 kDa	TRUE	Homo sapiens	0	4.1677	8.0121	0
355	TRUE	Empty	Peptidyl-glycine alpha-amidating monooxygenase OS=Homo sapiens OX=9606 GN=PAM PE=1 SV=2	P19021 (+2)	PAM	108 kDa	TRUE	Homo sapiens	0	1.3892	0	5.9983
356	TRUE	Empty	Polypyrimidine tract-binding protein 1 OS=Homo sapiens OX=9606 GN=PTBP1 PE=1 SV=1	P26599 (+2)	PTBP1	57 kDa		Homo sapiens	0	4.1677	0	8.2477
357	TRUE	Empty	Isoform 5 of Osteopontin OS=Homo sapiens OX=9606 GN=SPP1	P10451-5	SPP1	34 kDa		unknown	0	4.8624	0	7.4979
358	TRUE	Empty	Cadherin-6 OS=Homo sapiens OX=9606 GN=CDH6 PE=1 SV=1	P55285 (+1)	CDH6	88 kDa		Homo sapiens	0	3.4731	0	7.4979
359	TRUE	Empty	CD166 antigen OS=Homo sapiens OX=9606 GN=ALCAM PE=1 SV=2	Q13740 (+1)	ALCAM	65 kDa		Homo sapiens	0	3.4731	0	9.7473
360	TRUE	Empty	Histone H4 OS=Homo sapiens OX=9606 GN=HIST1H4A PE=1 SV=2	P62805	HIST1H4A	11 kDa		Homo sapiens	38.701	3.4731	1.7805	3.7489
361	TRUE	Empty	Heterogeneous nuclear ribonucleoproteins C1/C2 OS=Homo sapiens OX=9606 GN=HNRNPC PE=1 SV=4	P07910 (+1)	HNRNPC	34 kDa		Homo sapiens	0	3.4731	2.6707	4.4987
362	TRUE	Empty	Isoform 3 of Heterogeneous nuclear ribonucleoprotein A/B OS=Homo sapiens OX=9606 GN=HNRNPAB	Q99729-3	HNRNPAB	31 kDa	TRUE	unknown	0	4.1677	1.7805	4.4987
363	TRUE	Empty	Cathepsin D OS=Homo sapiens OX=9606 GN=CTSD PE=1 SV=1	P07339	CTSD	45 kDa		Homo sapiens	0	4.8624	0	5.2485
364	TRUE	Empty	14-3-3 protein eta OS=Homo sapiens OX=9606 GN=YWHAH PE=1 SV=4	Q04917	YWHAH	28 kDa	TRUE	Homo sapiens	0	8.3355	8.9023	8.2477
365	TRUE	Empty	tRNA-splicing ligase RtcB homolog OS=Homo sapiens OX=9606 GN=RTCB PE=1 SV=1	Q9Y3I0	RTCB	55 kDa		Homo sapiens	0	2.7785	3.5609	2.2494
366	TRUE	Empty	Glycogen phosphorylase, brain form OS=Homo sapiens OX=9606 GN=PYGB PE=1 SV=5	P11216	PYGB	97 kDa	TRUE	Homo sapiens	0	6.2516	8.0121	5.9983
367	TRUE	Empty	Tryptophan--tRNA ligase, cytoplasmic OS=Homo sapiens OX=9606 GN=WARS PE=1 SV=2	P23381	WARS	53 kDa		Homo sapiens	0	4.1677	4.4511	4.4987
368	TRUE	Empty	Ubiquitin carboxyl-terminal hydrolase 14 OS=Homo sapiens OX=9606 GN=USP14 PE=1 SV=3	P54578	USP14	56 kDa		Homo sapiens	0	2.7785	3.5609	2.9992
369	TRUE	Empty	Glutamine--tRNA ligase OS=Homo sapiens OX=9606 GN=QARS PE=1 SV=1	P47897 (+1)	QARS	88 kDa		Homo sapiens	0	4.1677	1.7805	2.9992
370	TRUE	Empty	Coactosin-like protein OS=Homo sapiens OX=9606 GN=COTL1 PE=1 SV=3	Q14019	COTL1	16 kDa		Homo sapiens	0	2.0839	2.6707	2.9992
371	TRUE	Empty	Leukotriene A-4 hydrolase OS=Homo sapiens OX=9606 GN=LTA4H PE=1 SV=2	P09960	LTA4H	69 kDa		Homo sapiens	0	3.4731	5.3414	0
372	TRUE	Empty	Peptidyl-prolyl cis-trans isomerase FKBP1A OS=Homo sapiens OX=9606 GN=FKBP1A PE=1 SV=2	P62942	FKBP1A	12 kDa		Homo sapiens	0	2.7785	6.2316	2.2494
373	TRUE	Empty	E3 ubiquitin-protein ligase HUWE1 OS=Homo sapiens OX=9606 GN=HUWE1 PE=1 SV=3	Q7Z6Z7 (+2)	HUWE1	482 kDa		Homo sapiens	0	1.3892	1.7805	0
374	TRUE	Empty	Coatomer subunit beta OS=Homo sapiens OX=9606 GN=COPB1 PE=1 SV=3	P53618	COPB1	107 kDa		Homo sapiens	0	3.4731	3.5609	1.4996
375	TRUE	Empty	Vacuolar protein sorting-associated protein 35 OS=Homo sapiens OX=9606 GN=VPS35 PE=1 SV=2	Q96QK1	VPS35	92 kDa		Homo sapiens	0	1.3892	4.4511	2.2494
376	TRUE	Empty	Transcription intermediary factor 1-beta OS=Homo sapiens OX=9606 GN=TRIM28 PE=1 SV=5	Q13263	TRIM28	89 kDa		Homo sapiens	0	4.1677	3.5609	2.9992
377	TRUE	Empty	Microtubule-associated protein RP/EB family member 1 OS=Homo sapiens OX=9606 GN=MAPRE1 PE=1 SV=3	Q15691	MAPRE1	30 kDa		Homo sapiens	0	4.1677	2.6707	2.9992
378	TRUE	Empty	UTP--glucose-1-phosphate uridylyltransferase OS=Homo sapiens OX=9606 GN=UGP2 PE=1 SV=5	Q16851 (+1)	UGP2	57 kDa		Homo sapiens	0	2.7785	6.2316	3.7489
379	TRUE	Empty	NSFL1 cofactor p47 OS=Homo sapiens OX=9606 GN=NSFL1C PE=1 SV=2	Q9UNZ2 (+1)	NSFL1C	41 kDa		Homo sapiens	0	4.1677	5.3414	2.9992
380	TRUE	Empty	PDZ and LIM domain protein 7 OS=Homo sapiens OX=9606 GN=PDLIM7 PE=1 SV=1	Q9NR12	PDLIM7	50 kDa		Homo sapiens	0	4.1677	1.7805	1.4996
381	TRUE	Empty	Isoform C1 of Tight junction protein ZO-2 OS=Homo sapiens OX=9606 GN=TJP2	Q9UDY2-3	TJP2	131 kDa		unknown	0	2.7785	4.4511	1.4996
382	TRUE	Empty	Secernin-1 OS=Homo sapiens OX=9606 GN=SCRN1 PE=1 SV=2	Q12765 (+1)	SCRN1	46 kDa		Homo sapiens	0	2.7785	7.1218	1.4996
383	TRUE	Empty	Peptidyl-prolyl cis-trans isomerase FKBP9 OS=Homo sapiens OX=9606 GN=FKBP9 PE=1 SV=2	O95302	FKBP9	63 kDa		Homo sapiens	0	2.7785	5.3414	0
384	TRUE	Empty	Isoform L-APP733 of Amyloid-beta A4 protein OS=Homo sapiens OX=9606 GN=APP	P05067-7 (+1)	APP	83 kDa		unknown	0	4.1677	0	5.2485
385	TRUE	Empty	Interleukin-6 OS=Homo sapiens OX=9606 GN=IL6 PE=1 SV=1	P05231	IL6	24 kDa		Homo sapiens	0	3.4731	0	5.2485
386	TRUE	Empty	Versican core protein OS=Homo sapiens OX=9606 GN=VCAN PE=1 SV=3	P13611 (+1)	VCAN	373 kDa		Homo sapiens	0	2.0839	0	4.4987
387	TRUE	Empty	Stathmin OS=Homo sapiens OX=9606 GN=STMN1 PE=1 SV=3	P16949 (+1)	STMN1	17 kDa		Homo sapiens	0	3.4731	2.6707	3.7489
388	TRUE	Empty	40S ribosomal protein S9 OS=Homo sapiens OX=9606 GN=RPS9 PE=1 SV=3	P46781	RPS9	23 kDa		Homo sapiens	0	0	1.7805	0
389	TRUE	Empty	eIF-2-alpha kinase activator GCN1 OS=Homo sapiens OX=9606 GN=GCN1 PE=1 SV=6	Q92616	GCN1	293 kDa		Homo sapiens	0	1.3892	4.4511	2.2494
390	TRUE	Empty	Proteasome subunit alpha type-2 OS=Homo sapiens OX=9606 GN=PSMA2 PE=1 SV=2	P25787	PSMA2	26 kDa		Homo sapiens	0	2.7785	3.5609	3.7489
391	TRUE	Empty	40S ribosomal protein S2 OS=Homo sapiens OX=9606 GN=RPS2 PE=1 SV=2	P15880	RPS2	31 kDa		Homo sapiens	0	2.7785	5.3414	1.4996
392	TRUE	Empty	Fermitin family homolog 2 OS=Homo sapiens OX=9606 GN=FERMT2 PE=1 SV=1	Q96AC1 (+1)	FERMT2	78 kDa		Homo sapiens	0	2.7785	4.4511	2.2494
393	TRUE	Empty	Aspartate aminotransferase, cytoplasmic OS=Homo sapiens OX=9606 GN=GOT1 PE=1 SV=3	P17174	GOT1	46 kDa		Homo sapiens	0	3.4731	3.5609	1.4996
394	TRUE	Empty	Isoform 4 of Dynactin subunit 1 OS=Homo sapiens OX=9606 GN=DCTN1	Q14203-4	DCTN1	139 kDa		unknown	0	4.1677	2.6707	1.4996
395	TRUE	Empty	Asparagine--tRNA ligase, cytoplasmic OS=Homo sapiens OX=9606 GN=NARS PE=1 SV=1	O43776	NARS	63 kDa		Homo sapiens	0	3.4731	1.7805	3.7489
396	TRUE	Empty	Dynamin-1-like protein OS=Homo sapiens OX=9606 GN=DNM1L PE=1 SV=2	O00429 (+6)	DNM1L	82 kDa		Homo sapiens	0	2.7785	3.5609	3.7489
397	TRUE	Empty	SH3 domain-binding glutamic acid-rich-like protein OS=Homo sapiens OX=9606 GN=SH3BGRL PE=1 SV=1	O75368	SH3BGRL	13 kDa		Homo sapiens	0	3.4731	5.3414	2.9992
398	TRUE	Empty	Proteasome subunit beta type-4 OS=Homo sapiens OX=9606 GN=PSMB4 PE=1 SV=4	P28070	PSMB4	29 kDa		Homo sapiens	0	4.1677	4.4511	5.2485
399	TRUE	Empty	F-actin-capping protein subunit alpha-1 OS=Homo sapiens OX=9606 GN=CAPZA1 PE=1 SV=3	P52907	CAPZA1	33 kDa	TRUE	Homo sapiens	0	2.7785	8.0121	3.7489
400	TRUE	Empty	26S proteasome regulatory subunit 8 OS=Homo sapiens OX=9606 GN=PSMC5 PE=1 SV=1	P62195 (+1)	PSMC5	46 kDa		Homo sapiens	0	2.7785	4.4511	2.2494
401	TRUE	Empty	40S ribosomal protein S4, X isoform OS=Homo sapiens OX=9606 GN=RPS4X PE=1 SV=2	P62701	RPS4X	30 kDa		Homo sapiens	0	2.7785	3.5609	2.9992
402	TRUE	Empty	Nucleosome assembly protein 1-like 4 OS=Homo sapiens OX=9606 GN=NAP1L4 PE=1 SV=1	Q99733 (+1)	NAP1L4	43 kDa	TRUE	Homo sapiens	0	4.8624	7.1218	3.7489
403	TRUE	Empty	Obg-like ATPase 1 OS=Homo sapiens OX=9606 GN=OLA1 PE=1 SV=2	Q9NTK5	OLA1	45 kDa		Homo sapiens	0	2.7785	4.4511	4.4987
404	TRUE	Empty	Serine-threonine kinase receptor-associated protein OS=Homo sapiens OX=9606 GN=STRAP PE=1 SV=1	Q9Y3F4 (+1)	STRAP	38 kDa		Homo sapiens	0	3.4731	4.4511	3.7489
405	TRUE	Empty	F-actin-capping protein subunit alpha-2 OS=Homo sapiens OX=9606 GN=CAPZA2 PE=1 SV=3	P47755	CAPZA2	33 kDa	TRUE	Homo sapiens	0	3.4731	5.3414	1.4996
406	TRUE	Empty	ATP-dependent RNA helicase DDX3X OS=Homo sapiens OX=9606 GN=DDX3X PE=1 SV=3	O00571	DDX3X	73 kDa	TRUE	Homo sapiens	0	2.7785	1.7805	2.9992
407	TRUE	Empty	Septin-11 OS=Homo sapiens OX=9606 GN=SEPT11 PE=1 SV=3	Q9NVA2 (+1)	2022-09-11	49 kDa		Homo sapiens	0	3.4731	2.6707	2.9992
408	TRUE	Empty	UDP-glucose:glycoprotein glucosyltransferase 1 OS=Homo sapiens OX=9606 GN=UGGT1 PE=1 SV=3	Q9NYU2 (+1)	UGGT1	177 kDa		Homo sapiens	0	1.3892	2.6707	1.4996
409	TRUE	Empty	Adapter molecule crk OS=Homo sapiens OX=9606 GN=CRK PE=1 SV=2	P46108	CRK	34 kDa	TRUE	Homo sapiens	0	2.7785	5.3414	1.4996
410	TRUE	Empty	Isoform 4 of Probable ATP-dependent RNA helicase DDX17 OS=Homo sapiens OX=9606 GN=DDX17	Q92841-3	DDX17	73 kDa	TRUE	unknown	19.35	2.0839	0	5.2485
411	TRUE	Empty	14 kDa phosphohistidine phosphatase OS=Homo sapiens OX=9606 GN=PHPT1 PE=1 SV=1	Q9NRX4	PHPT1	14 kDa		Homo sapiens	0	4.1677	5.3414	0
412	TRUE	Empty	Galectin-3 OS=Homo sapiens OX=9606 GN=LGALS3 PE=1 SV=5	P17931	LGALS3	26 kDa		Homo sapiens	0	5.557	8.0121	0
413	TRUE	Empty	Desmoglein-1 OS=Homo sapiens OX=9606 GN=DSG1 PE=1 SV=2	Q02413	DSG1	114 kDa		Homo sapiens	38.701	0	2.6707	0
414	TRUE	Empty	Prolow-density lipoprotein receptor-related protein 1 OS=Homo sapiens OX=9606 GN=LRP1 PE=1 SV=2	Q07954	LRP1	505 kDa		Homo sapiens	0	0	1.7805	0
415	TRUE	Empty	Tubulin beta-2A chain OS=Homo sapiens OX=9606 GN=TUBB2A PE=1 SV=1	Q13885	TUBB2A	50 kDa	TRUE	Homo sapiens	0	22.228	39.17	24.743
416	TRUE	Empty	60S ribosomal protein L12 OS=Homo sapiens OX=9606 GN=RPL12 PE=1 SV=1	P30050	RPL12	18 kDa		Homo sapiens	0	2.0839	3.5609	3.7489
417	TRUE	Empty	Eukaryotic translation initiation factor 4 gamma 1 OS=Homo sapiens OX=9606 GN=EIF4G1 PE=1 SV=4	Q04637 (+5)	EIF4G1	175 kDa		Homo sapiens	0	2.7785	1.7805	1.4996
418	TRUE	Empty	Ribosome-binding protein 1 OS=Homo sapiens OX=9606 GN=RRBP1 PE=1 SV=5	Q9P2E9	RRBP1	152 kDa		Homo sapiens	0	2.0839	0	3.7489
419	TRUE	Empty	Proteasome subunit alpha type-7 OS=Homo sapiens OX=9606 GN=PSMA7 PE=1 SV=1	O14818	PSMA7	28 kDa		Homo sapiens	0	2.0839	1.7805	0
420	TRUE	Empty	60S ribosomal protein L4 OS=Homo sapiens OX=9606 GN=RPL4 PE=1 SV=5	P36578	RPL4	48 kDa		Homo sapiens	0	2.0839	6.2316	0
421	TRUE	Empty	Twinfilin-2 OS=Homo sapiens OX=9606 GN=TWF2 PE=1 SV=2	Q6IBS0	TWF2	40 kDa		Homo sapiens	0	2.7785	4.4511	3.7489
422	TRUE	Empty	Isocitrate dehydrogenase [NADP] cytoplasmic OS=Homo sapiens OX=9606 GN=IDH1 PE=1 SV=2	O75874	IDH1	47 kDa		Homo sapiens	0	2.0839	1.7805	2.2494
423	TRUE	Empty	Actin-related protein 2/3 complex subunit 3 OS=Homo sapiens OX=9606 GN=ARPC3 PE=1 SV=3	O15145	ARPC3	21 kDa		Homo sapiens	0	3.4731	2.6707	2.2494
424	TRUE	Empty	Actin-related protein 2/3 complex subunit 4 OS=Homo sapiens OX=9606 GN=ARPC4 PE=1 SV=3	P59998	ARPC4	20 kDa		Homo sapiens	0	2.7785	3.5609	2.2494
425	TRUE	Empty	Pseudouridine-5'-phosphatase OS=Homo sapiens OX=9606 GN=PUDP PE=1 SV=3	Q08623	PUDP	25 kDa		Homo sapiens	0	2.0839	3.5609	4.4987
426	TRUE	Empty	Coronin-1B OS=Homo sapiens OX=9606 GN=CORO1B PE=1 SV=1	Q9BR76	CORO1B	54 kDa		Homo sapiens	0	2.7785	2.6707	2.2494
427	TRUE	Empty	Jupiter microtubule associated homolog 2 OS=Homo sapiens OX=9606 GN=JPT2 PE=1 SV=1	Q9H910 (+1)	JPT2	20 kDa		Homo sapiens	0	4.1677	3.5609	2.9992
428	TRUE	Empty	Eukaryotic translation initiation factor 2 subunit 1 OS=Homo sapiens OX=9606 GN=EIF2S1 PE=1 SV=3	P05198	EIF2S1	36 kDa		Homo sapiens	0	3.4731	1.7805	2.2494
429	TRUE	Empty	Heterogeneous nuclear ribonucleoprotein M OS=Homo sapiens OX=9606 GN=HNRNPM PE=1 SV=3	P52272 (+1)	HNRNPM	78 kDa		Homo sapiens	0	2.0839	1.7805	2.9992
430	TRUE	Empty	40S ribosomal protein S16 OS=Homo sapiens OX=9606 GN=RPS16 PE=1 SV=2	P62249	RPS16	16 kDa		Homo sapiens	0	1.3892	1.7805	1.4996
431	TRUE	Empty	Extracellular matrix protein 1 OS=Homo sapiens OX=9606 GN=ECM1 PE=1 SV=2	Q16610 (+1)	ECM1	61 kDa		Homo sapiens	0	4.1677	3.5609	1.4996
432	TRUE	Empty	Serine/threonine-protein phosphatase PP1-beta catalytic subunit OS=Homo sapiens OX=9606 GN=PPP1CB PE=1 SV=3	P62140	PPP1CB	37 kDa	TRUE	Homo sapiens	0	0	5.3414	1.4996
433	TRUE	Empty	LIM domain and actin-binding protein 1 OS=Homo sapiens OX=9606 GN=LIMA1 PE=1 SV=1	Q9UHB6 (+4)	LIMA1	85 kDa		Homo sapiens	0	2.7785	0	0
434	TRUE	Empty	Reticulocalbin-2 OS=Homo sapiens OX=9606 GN=RCN2 PE=1 SV=1	Q14257 (+1)	RCN2	37 kDa		Homo sapiens	0	4.1677	6.2316	0
435	TRUE	Empty	Proteasome subunit beta type-7 OS=Homo sapiens OX=9606 GN=PSMB7 PE=1 SV=1	Q99436	PSMB7	30 kDa		Homo sapiens	0	0	2.6707	0
436	TRUE	Empty	Plasminogen activator inhibitor 1 RNA-binding protein OS=Homo sapiens OX=9606 GN=SERBP1 PE=1 SV=2	Q8NC51 (+3)	SERBP1	45 kDa		Homo sapiens	0	2.0839	0	2.9992
437	TRUE	Empty	PDZ and LIM domain protein 4 OS=Homo sapiens OX=9606 GN=PDLIM4 PE=1 SV=2	P50479	PDLIM4	35 kDa		Homo sapiens	0	2.7785	0	5.9983
438	TRUE	Empty	Ran GTPase-activating protein 1 OS=Homo sapiens OX=9606 GN=RANGAP1 PE=1 SV=1	P46060	RANGAP1	64 kDa		Homo sapiens	0	2.0839	0	5.2485
439	TRUE	Empty	Brain acid soluble protein 1 OS=Homo sapiens OX=9606 GN=BASP1 PE=1 SV=2	P80723	BASP1	23 kDa		Homo sapiens	0	2.0839	2.6707	1.4996
440	TRUE	Empty	Proteasome subunit alpha type-5 OS=Homo sapiens OX=9606 GN=PSMA5 PE=1 SV=3	P28066	PSMA5	26 kDa		Homo sapiens	0	2.7785	2.6707	3.7489
441	TRUE	Empty	Peroxiredoxin-2 OS=Homo sapiens OX=9606 GN=PRDX2 PE=1 SV=5	P32119	PRDX2	22 kDa	TRUE	Homo sapiens	0	3.4731	3.5609	3.7489
442	TRUE	Empty	Histone H2AX OS=Homo sapiens OX=9606 GN=H2AFX PE=1 SV=2	P16104	H2AFX	15 kDa		Homo sapiens	29.026	2.7785	0	0
443	TRUE	Empty	Lactoylglutathione lyase OS=Homo sapiens OX=9606 GN=GLO1 PE=1 SV=4	Q04760	GLO1	21 kDa		Homo sapiens	0	1.3892	1.7805	1.4996
444	TRUE	Empty	Elongation factor 1-delta OS=Homo sapiens OX=9606 GN=EEF1D PE=1 SV=5	P29692 (+1)	EEF1D	31 kDa		Homo sapiens	0	4.1677	1.7805	3.7489
445	TRUE	Empty	Eukaryotic translation initiation factor 3 subunit C-like protein OS=Homo sapiens OX=9606 GN=EIF3CL PE=3 SV=1	B5ME19 (+1)	EIF3CL	105 kDa		Homo sapiens	0	4.1677	1.7805	2.2494
446	TRUE	Empty	Protein flightless-1 homolog OS=Homo sapiens OX=9606 GN=FLII PE=1 SV=2	Q13045 (+1)	FLII	145 kDa		Homo sapiens	0	2.7785	2.6707	2.2494
447	TRUE	Empty	Proteasome subunit beta type-1 OS=Homo sapiens OX=9606 GN=PSMB1 PE=1 SV=2	P20618	PSMB1	26 kDa		Homo sapiens	0	2.0839	4.4511	3.7489
448	TRUE	Empty	Transcription factor BTF3 OS=Homo sapiens OX=9606 GN=BTF3 PE=1 SV=1	P20290 (+1)	BTF3	22 kDa		Homo sapiens	0	4.1677	3.5609	3.7489
449	TRUE	Empty	Proteasome subunit alpha type-3 OS=Homo sapiens OX=9606 GN=PSMA3 PE=1 SV=2	P25788 (+1)	PSMA3	28 kDa		Homo sapiens	0	3.4731	3.5609	3.7489
450	TRUE	Empty	Eukaryotic translation initiation factor 2 subunit 3 OS=Homo sapiens OX=9606 GN=EIF2S3 PE=1 SV=3	P41091	EIF2S3	51 kDa		Homo sapiens	0	3.4731	4.4511	2.9992
451	TRUE	Empty	Proteasome subunit beta type-2 OS=Homo sapiens OX=9606 GN=PSMB2 PE=1 SV=1	P49721	PSMB2	23 kDa		Homo sapiens	0	2.7785	3.5609	2.9992
452	TRUE	Empty	Lumican OS=Homo sapiens OX=9606 GN=LUM PE=1 SV=2	P51884	LUM	38 kDa		Homo sapiens	0	2.7785	4.4511	3.7489
453	TRUE	Empty	Peptidyl-prolyl cis-trans isomerase FKBP3 OS=Homo sapiens OX=9606 GN=FKBP3 PE=1 SV=1	Q00688	FKBP3	25 kDa		Homo sapiens	0	2.7785	3.5609	2.2494
454	TRUE	Empty	Eukaryotic translation initiation factor 3 subunit B OS=Homo sapiens OX=9606 GN=EIF3B PE=1 SV=3	P55884 (+1)	EIF3B	92 kDa		Homo sapiens	0	2.7785	2.6707	1.4996
455	TRUE	Empty	Drebrin-like protein OS=Homo sapiens OX=9606 GN=DBNL PE=1 SV=1	Q9UJU6 (+2)	DBNL	48 kDa		Homo sapiens	0	2.7785	4.4511	1.4996
456	TRUE	Empty	Tubulin-specific chaperone A OS=Homo sapiens OX=9606 GN=TBCA PE=1 SV=3	O75347	TBCA	13 kDa		Homo sapiens	0	2.7785	1.7805	2.9992
457	TRUE	Empty	Insulin-like growth factor 2 mRNA-binding protein 3 OS=Homo sapiens OX=9606 GN=IGF2BP3 PE=1 SV=2	O00425	IGF2BP3	64 kDa	TRUE	Homo sapiens	0	2.0839	4.4511	2.2494
458	TRUE	Empty	26S proteasome regulatory subunit 7 OS=Homo sapiens OX=9606 GN=PSMC2 PE=1 SV=3	P35998	PSMC2	49 kDa		Homo sapiens	0	3.4731	2.6707	1.4996
459	TRUE	Empty	Nicotinamide phosphoribosyltransferase OS=Homo sapiens OX=9606 GN=NAMPT PE=1 SV=1	P43490	NAMPT	56 kDa		Homo sapiens	0	2.0839	0	3.7489
460	TRUE	Empty	Isoform 9 of Protein transport protein Sec31A OS=Homo sapiens OX=9606 GN=SEC31A	O94979-9	SEC31A	131 kDa		unknown	0	2.7785	0	2.9992
461	TRUE	Empty	Beta-2-microglobulin OS=Homo sapiens OX=9606 GN=B2M PE=1 SV=1	P61769	B2M	14 kDa		Homo sapiens	0	2.7785	0	3.7489
462	TRUE	Empty	Caveolae-associated protein 1 OS=Homo sapiens OX=9606 GN=CAVIN1 PE=1 SV=1	Q6NZI2	CAVIN1	43 kDa		Homo sapiens	0	2.7785	3.5609	0
463	TRUE	Empty	Matrix metalloproteinase-9 OS=Homo sapiens OX=9606 GN=MMP9 PE=1 SV=3	P14780	MMP9	78 kDa		Homo sapiens	0	2.7785	0	6.7481
464	TRUE	Empty	Stress-70 protein, mitochondrial OS=Homo sapiens OX=9606 GN=HSPA9 PE=1 SV=2	P38646	HSPA9	74 kDa		Homo sapiens	0	1.3892	0	5.2485
465	TRUE	Empty	Protein kinase C and casein kinase substrate in neurons protein 2 OS=Homo sapiens OX=9606 GN=PACSIN2 PE=1 SV=2	Q9UNF0 (+1)	PACSIN2	56 kDa		Homo sapiens	0	2.0839	2.6707	0
466	TRUE	Empty	Phosphoribosylformylglycinamidine synthase OS=Homo sapiens OX=9606 GN=PFAS PE=1 SV=4	O15067	PFAS	145 kDa		Homo sapiens	0	0	0	2.9992
467	TRUE	Empty	Matrin-3 OS=Homo sapiens OX=9606 GN=MATR3 PE=1 SV=2	P43243	MATR3	95 kDa		Homo sapiens	0	4.8624	0	3.7489
468	TRUE	Empty	Superoxide dismutase [Mn], mitochondrial OS=Homo sapiens OX=9606 GN=SOD2 PE=1 SV=3	P04179	SOD2	25 kDa		Homo sapiens	0	4.1677	0	5.2485
469	TRUE	Empty	A disintegrin and metalloproteinase with thrombospondin motifs 1 OS=Homo sapiens OX=9606 GN=ADAMTS1 PE=1 SV=4	Q9UHI8	ADAMTS1	105 kDa		Homo sapiens	0	1.3892	0	5.9983
470	TRUE	Empty	40S ribosomal protein S7 OS=Homo sapiens OX=9606 GN=RPS7 PE=1 SV=1	P62081	RPS7	22 kDa		Homo sapiens	0	2.0839	5.3414	1.4996
471	TRUE	Empty	26S proteasome non-ATPase regulatory subunit 12 OS=Homo sapiens OX=9606 GN=PSMD12 PE=1 SV=3	O00232	PSMD12	53 kDa		Homo sapiens	0	0	3.5609	1.4996
472	TRUE	Empty	Ubiquitin thioesterase OTUB1 OS=Homo sapiens OX=9606 GN=OTUB1 PE=1 SV=2	Q96FW1	OTUB1	31 kDa		Homo sapiens	0	2.0839	2.6707	1.4996
473	TRUE	Empty	Xaa-Pro aminopeptidase 1 OS=Homo sapiens OX=9606 GN=XPNPEP1 PE=1 SV=3	Q9NQW7 (+1)	XPNPEP1	70 kDa		Homo sapiens	0	2.0839	4.4511	0
474	TRUE	Empty	KH domain-containing, RNA-binding, signal transduction-associated protein 1 OS=Homo sapiens OX=9606 GN=KHDRBS1 PE=1 SV=1	Q07666	KHDRBS1	48 kDa		Homo sapiens	0	2.0839	0	2.9992
475	TRUE	Empty	Fructose-bisphosphate aldolase C OS=Homo sapiens OX=9606 GN=ALDOC PE=1 SV=2	P09972	ALDOC	39 kDa	TRUE	Homo sapiens	0	4.8624	6.2316	4.4987
476	TRUE	Empty	Receptor of activated protein C kinase 1 OS=Homo sapiens OX=9606 GN=RACK1 PE=1 SV=3	P63244	RACK1	35 kDa		Homo sapiens	0	0	1.7805	1.4996
477	TRUE	Empty	RNA transcription, translation and transport factor protein OS=Homo sapiens OX=9606 GN=RTRAF PE=1 SV=1	Q9Y224	RTRAF	28 kDa		Homo sapiens	0	3.4731	3.5609	3.7489
478	TRUE	Empty	Pyridoxal kinase OS=Homo sapiens OX=9606 GN=PDXK PE=1 SV=1	O00764 (+1)	PDXK	35 kDa		Homo sapiens	0	2.7785	2.6707	2.9992
479	TRUE	Empty	Proteasome subunit alpha type-1 OS=Homo sapiens OX=9606 GN=PSMA1 PE=1 SV=1	P25786 (+1)	PSMA1	30 kDa		Homo sapiens	0	1.3892	5.3414	2.2494
480	TRUE	Empty	Glutathione S-transferase omega-1 OS=Homo sapiens OX=9606 GN=GSTO1 PE=1 SV=2	P78417	GSTO1	28 kDa		Homo sapiens	0	2.0839	1.7805	2.9992
481	TRUE	Empty	Protein FAM3C OS=Homo sapiens OX=9606 GN=FAM3C PE=1 SV=1	Q92520	FAM3C	25 kDa		Homo sapiens	0	2.7785	1.7805	2.9992
482	TRUE	Empty	UBX domain-containing protein 1 OS=Homo sapiens OX=9606 GN=UBXN1 PE=1 SV=2	Q04323	UBXN1	33 kDa		Homo sapiens	0	2.7785	2.6707	2.9992
483	TRUE	Empty	Leucine--tRNA ligase, cytoplasmic OS=Homo sapiens OX=9606 GN=LARS PE=1 SV=2	Q9P2J5 (+1)	LARS	134 kDa		Homo sapiens	0	2.0839	1.7805	2.9992
484	TRUE	Empty	Cytoplasmic FMR1-interacting protein 1 OS=Homo sapiens OX=9606 GN=CYFIP1 PE=1 SV=1	Q7L576	CYFIP1	145 kDa		Homo sapiens	0	2.7785	3.5609	1.4996
485	TRUE	Empty	Glutathione synthetase OS=Homo sapiens OX=9606 GN=GSS PE=1 SV=1	P48637	GSS	52 kDa		Homo sapiens	0	1.3892	4.4511	1.4996
486	TRUE	Empty	Inosine-5'-monophosphate dehydrogenase 2 OS=Homo sapiens OX=9606 GN=IMPDH2 PE=1 SV=2	P12268	IMPDH2	56 kDa		Homo sapiens	0	2.7785	0	3.7489
487	TRUE	Empty	Isoform 3 of Basic leucine zipper and W2 domain-containing protein 1 OS=Homo sapiens OX=9606 GN=BZW1	Q7L1Q6-3	BZW1	51 kDa		unknown	0	0	1.7805	0
488	TRUE	Empty	Immunoglobulin heavy constant gamma 1 OS=Homo sapiens OX=9606 GN=IGHG1 PE=1 SV=1	P01857 (+1)	IGHG1	36 kDa	TRUE	Homo sapiens	19.35	0	0	3.7489
489	TRUE	Empty	45 kDa calcium-binding protein OS=Homo sapiens OX=9606 GN=SDF4 PE=1 SV=1	Q9BRK5	SDF4	42 kDa		Homo sapiens	0	2.7785	0	0
490	TRUE	Empty	Far upstream element-binding protein 2 OS=Homo sapiens OX=9606 GN=KHSRP PE=1 SV=4	Q92945	KHSRP	73 kDa		Homo sapiens	0	2.0839	0	3.7489
491	TRUE	Empty	Caprin-1 OS=Homo sapiens OX=9606 GN=CAPRIN1 PE=1 SV=2	Q14444 (+1)	CAPRIN1	78 kDa		Homo sapiens	0	4.8624	0	5.2485
492	TRUE	Empty	Gamma-glutamyl hydrolase OS=Homo sapiens OX=9606 GN=GGH PE=1 SV=2	Q92820	GGH	36 kDa		Homo sapiens	0	4.1677	0	5.2485
493	TRUE	Empty	Splicing factor 3A subunit 1 OS=Homo sapiens OX=9606 GN=SF3A1 PE=1 SV=1	Q15459	SF3A1	89 kDa		Homo sapiens	0	0	0	1.4996
494	TRUE	Empty	Laminin subunit alpha-5 OS=Homo sapiens OX=9606 GN=LAMA5 PE=1 SV=8	O15230	LAMA5	400 kDa		Homo sapiens	0	0	0	5.9983
495	TRUE	Empty	D-3-phosphoglycerate dehydrogenase OS=Homo sapiens OX=9606 GN=PHGDH PE=1 SV=4	O43175	PHGDH	57 kDa		Homo sapiens	0	2.0839	0	1.4996
496	TRUE	Empty	Phosphoacetylglucosamine mutase OS=Homo sapiens OX=9606 GN=PGM3 PE=1 SV=1	O95394 (+1)	PGM3	60 kDa		Homo sapiens	0	2.0839	0	1.4996
497	TRUE	Empty	V-type proton ATPase catalytic subunit A OS=Homo sapiens OX=9606 GN=ATP6V1A PE=1 SV=2	P38606 (+1)	ATP6V1A	68 kDa		Homo sapiens	0	2.7785	0	2.9992
498	TRUE	Empty	40S ribosomal protein S15 OS=Homo sapiens OX=9606 GN=RPS15 PE=1 SV=2	P62841	RPS15	17 kDa		Homo sapiens	0	5.557	2.6707	0
499	TRUE	Empty	Destrin OS=Homo sapiens OX=9606 GN=DSTN PE=1 SV=3	P60981	DSTN	19 kDa		Homo sapiens	0	2.0839	3.5609	2.2494
500	TRUE	Empty	40S ribosomal protein S18 OS=Homo sapiens OX=9606 GN=RPS18 PE=1 SV=3	P62269	RPS18	18 kDa		Homo sapiens	0	2.0839	3.5609	2.2494
501	TRUE	Empty	Eukaryotic translation initiation factor 4H OS=Homo sapiens OX=9606 GN=EIF4H PE=1 SV=5	Q15056 (+1)	EIF4H	27 kDa		Homo sapiens	0	2.7785	4.4511	2.9992
502	TRUE	Empty	Tubulin-folding cofactor B OS=Homo sapiens OX=9606 GN=TBCB PE=1 SV=2	Q99426	TBCB	27 kDa		Homo sapiens	0	2.0839	5.3414	2.2494
503	TRUE	Empty	26S proteasome regulatory subunit 10B OS=Homo sapiens OX=9606 GN=PSMC6 PE=1 SV=1	P62333	PSMC6	44 kDa		Homo sapiens	0	2.0839	3.5609	2.2494
504	TRUE	Empty	Septin-7 OS=Homo sapiens OX=9606 GN=SEPT7 PE=1 SV=2	Q16181 (+1)	2022-09-07	51 kDa		Homo sapiens	0	2.7785	4.4511	4.4987
505	TRUE	Empty	SH3 domain-binding glutamic acid-rich-like protein 3 OS=Homo sapiens OX=9606 GN=SH3BGRL3 PE=1 SV=1	Q9H299	SH3BGRL3	10 kDa		Homo sapiens	0	3.4731	3.5609	2.2494
506	TRUE	Empty	GTP-binding nuclear protein Ran OS=Homo sapiens OX=9606 GN=RAN PE=1 SV=3	P62826	RAN	24 kDa		Homo sapiens	0	2.7785	2.6707	2.9992
507	TRUE	Empty	EF-hand domain-containing protein D2 OS=Homo sapiens OX=9606 GN=EFHD2 PE=1 SV=1	Q96C19	EFHD2	27 kDa	TRUE	Homo sapiens	0	3.4731	1.7805	2.2494
508	TRUE	Empty	Desmoglein-2 OS=Homo sapiens OX=9606 GN=DSG2 PE=1 SV=2	Q14126	DSG2	122 kDa		Homo sapiens	0	2.0839	1.7805	2.9992
509	TRUE	Empty	Vacuolar protein sorting-associated protein 4B OS=Homo sapiens OX=9606 GN=VPS4B PE=1 SV=2	O75351	VPS4B	49 kDa		Homo sapiens	0	1.3892	2.6707	1.4996
510	TRUE	Empty	Heterogeneous nuclear ribonucleoprotein U OS=Homo sapiens OX=9606 GN=HNRNPU PE=1 SV=6	Q00839	HNRNPU	91 kDa		Homo sapiens	19.35	2.0839	0	2.2494
511	TRUE	Empty	Tropomodulin-3 OS=Homo sapiens OX=9606 GN=TMOD3 PE=1 SV=1	Q9NYL9	TMOD3	40 kDa		Homo sapiens	0	3.4731	2.6707	2.9992
512	TRUE	Empty	Alcohol dehydrogenase [NADP(+)] OS=Homo sapiens OX=9606 GN=AKR1A1 PE=1 SV=3	P14550	AKR1A1	37 kDa		Homo sapiens	0	2.7785	4.4511	2.2494
513	TRUE	Empty	Mitogen-activated protein kinase 1 OS=Homo sapiens OX=9606 GN=MAPK1 PE=1 SV=3	P28482	MAPK1	41 kDa		Homo sapiens	0	1.3892	2.6707	1.4996
514	TRUE	Empty	Laminin subunit beta-2 OS=Homo sapiens OX=9606 GN=LAMB2 PE=1 SV=2	P55268	LAMB2	196 kDa		Homo sapiens	0	0	1.7805	1.4996
515	TRUE	Empty	40S ribosomal protein S17 OS=Homo sapiens OX=9606 GN=RPS17 PE=1 SV=2	P08708	RPS17	16 kDa		Homo sapiens	0	2.7785	4.4511	0
516	TRUE	Empty	Serine--tRNA ligase, cytoplasmic OS=Homo sapiens OX=9606 GN=SARS PE=1 SV=3	P49591	SARS	59 kDa		Homo sapiens	0	0	1.7805	1.4996
517	TRUE	Empty	Coatomer subunit delta OS=Homo sapiens OX=9606 GN=ARCN1 PE=1 SV=1	P48444	ARCN1	57 kDa		Homo sapiens	0	1.3892	0	0
518	TRUE	Empty	Exportin-2 OS=Homo sapiens OX=9606 GN=CSE1L PE=1 SV=3	P55060 (+2)	CSE1L	110 kDa		Homo sapiens	0	3.4731	0	4.4987
519	TRUE	Empty	Serine protease 23 OS=Homo sapiens OX=9606 GN=PRSS23 PE=1 SV=1	O95084	PRSS23	43 kDa		Homo sapiens	0	4.1677	0	2.2494
520	TRUE	Empty	Radixin OS=Homo sapiens OX=9606 GN=RDX PE=1 SV=1	P35241 (+1)	RDX	69 kDa	TRUE	Homo sapiens	0	6.2516	14.244	0
521	TRUE	Empty	Histidine triad nucleotide-binding protein 1 OS=Homo sapiens OX=9606 GN=HINT1 PE=1 SV=2	P49773	HINT1	14 kDa		Homo sapiens	0	4.1677	0	3.7489
522	TRUE	Empty	Cathepsin B OS=Homo sapiens OX=9606 GN=CTSB PE=1 SV=3	P07858	CTSB	38 kDa		Homo sapiens	0	2.7785	0	2.2494
523	TRUE	Empty	Integrin beta-1 OS=Homo sapiens OX=9606 GN=ITGB1 PE=1 SV=2	P05556	ITGB1	88 kDa		Homo sapiens	0	1.3892	0	2.9992
524	TRUE	Empty	Proteasome adapter and scaffold protein ECM29 OS=Homo sapiens OX=9606 GN=ECPAS PE=1 SV=2	Q5VYK3	ECPAS	204 kDa		Homo sapiens	0	3.4731	0	3.7489
525	TRUE	Empty	Y-box-binding protein 3 OS=Homo sapiens OX=9606 GN=YBX3 PE=1 SV=4	P16989 (+1)	YBX3	40 kDa	TRUE	Homo sapiens	0	2.0839	4.4511	0
526	TRUE	Empty	40S ribosomal protein S3a OS=Homo sapiens OX=9606 GN=RPS3A PE=1 SV=2	P61247	RPS3A	30 kDa		Homo sapiens	0	0	1.7805	0
527	TRUE	Empty	RNA-binding protein FUS OS=Homo sapiens OX=9606 GN=FUS PE=1 SV=1	P35637 (+1)	FUS	53 kDa		Homo sapiens	0	2.7785	0	2.9992
528	TRUE	Empty	Costars family protein ABRACL OS=Homo sapiens OX=9606 GN=ABRACL PE=1 SV=1	Q9P1F3	ABRACL	9 kDa		Homo sapiens	0	2.0839	0	1.4996
529	TRUE	Empty	N(G),N(G)-dimethylarginine dimethylaminohydrolase 2 OS=Homo sapiens OX=9606 GN=DDAH2 PE=1 SV=1	O95865	DDAH2	30 kDa		Homo sapiens	0	2.0839	3.5609	0
530	TRUE	Empty	STE20-like serine/threonine-protein kinase OS=Homo sapiens OX=9606 GN=SLK PE=1 SV=1	Q9H2G2 (+1)	SLK	143 kDa	TRUE	Homo sapiens	0	1.3892	5.3414	0
531	TRUE	Empty	Ribonuclease T2 OS=Homo sapiens OX=9606 GN=RNASET2 PE=1 SV=2	O00584	RNASET2	29 kDa		Homo sapiens	0	2.7785	0	3.7489
532	TRUE	Empty	Intercellular adhesion molecule 1 OS=Homo sapiens OX=9606 GN=ICAM1 PE=1 SV=2	P05362	ICAM1	58 kDa		Homo sapiens	0	2.7785	0	5.2485
533	TRUE	Empty	Glutaminyl-peptide cyclotransferase OS=Homo sapiens OX=9606 GN=QPCT PE=1 SV=1	Q16769	QPCT	41 kDa		Homo sapiens	0	2.7785	0	3.7489
534	TRUE	Empty	RNA-binding motif protein, X chromosome OS=Homo sapiens OX=9606 GN=RBMX PE=1 SV=3	P38159	RBMX	42 kDa		Homo sapiens	0	2.0839	0	2.2494
535	TRUE	Empty	40S ribosomal protein S15a OS=Homo sapiens OX=9606 GN=RPS15A PE=1 SV=2	P62244	RPS15A	15 kDa		Homo sapiens	0	2.0839	2.6707	2.2494
536	TRUE	Empty	Poly(rC)-binding protein 1 OS=Homo sapiens OX=9606 GN=PCBP1 PE=1 SV=2	Q15365	PCBP1	37 kDa	TRUE	Homo sapiens	0	4.1677	0	3.7489
537	TRUE	Empty	Isoform 2C of Cytoplasmic dynein 1 intermediate chain 2 OS=Homo sapiens OX=9606 GN=DYNC1I2	Q13409-3	DYNC1I2	68 kDa		unknown	0	3.4731	1.7805	0
538	TRUE	Empty	ATP-dependent RNA helicase A OS=Homo sapiens OX=9606 GN=DHX9 PE=1 SV=4	Q08211	DHX9	141 kDa		Homo sapiens	0	0	0	3.7489
539	TRUE	Empty	26S proteasome non-ATPase regulatory subunit 11 OS=Homo sapiens OX=9606 GN=PSMD11 PE=1 SV=3	O00231 (+1)	PSMD11	47 kDa		Homo sapiens	0	2.0839	2.6707	2.2494
540	TRUE	Empty	Protein S100-A16 OS=Homo sapiens OX=9606 GN=S100A16 PE=1 SV=1	Q96FQ6	S100A16	12 kDa		Homo sapiens	0	2.0839	2.6707	2.2494
541	TRUE	Empty	Tubulin alpha-4A chain OS=Homo sapiens OX=9606 GN=TUBA4A PE=1 SV=1	P68366 (+1)	TUBA4A	50 kDa	TRUE	Homo sapiens	0	22.228	24.926	20.244
542	TRUE	Empty	CAD protein OS=Homo sapiens OX=9606 GN=CAD PE=1 SV=3	P27708	CAD	243 kDa		Homo sapiens	0	1.3892	2.6707	2.9992
543	TRUE	Empty	Isoform 2 of Coiled-coil domain-containing protein 80 OS=Homo sapiens OX=9606 GN=CCDC80	Q76M96-2	CCDC80	109 kDa		unknown	0	2.7785	1.7805	1.4996
544	TRUE	Empty	Heterogeneous nuclear ribonucleoprotein A3 OS=Homo sapiens OX=9606 GN=HNRNPA3 PE=1 SV=2	P51991 (+1)	HNRNPA3	40 kDa	TRUE	Homo sapiens	0	4.1677	1.7805	2.9992
545	TRUE	Empty	Ras suppressor protein 1 OS=Homo sapiens OX=9606 GN=RSU1 PE=1 SV=3	Q15404 (+1)	RSU1	32 kDa		Homo sapiens	0	2.0839	1.7805	1.4996
546	TRUE	Empty	26S proteasome non-ATPase regulatory subunit 14 OS=Homo sapiens OX=9606 GN=PSMD14 PE=1 SV=1	O00487	PSMD14	35 kDa		Homo sapiens	0	2.7785	1.7805	2.2494
547	TRUE	Empty	Ubiquitin-conjugating enzyme E2 K OS=Homo sapiens OX=9606 GN=UBE2K PE=1 SV=3	P61086	UBE2K	22 kDa		Homo sapiens	0	2.0839	1.7805	0
548	TRUE	Empty	Thioredoxin domain-containing protein 12 OS=Homo sapiens OX=9606 GN=TXNDC12 PE=1 SV=1	O95881	TXNDC12	19 kDa		Homo sapiens	0	2.0839	1.7805	0
549	TRUE	Empty	UDP-glucose 6-dehydrogenase OS=Homo sapiens OX=9606 GN=UGDH PE=1 SV=1	O60701	UGDH	55 kDa		Homo sapiens	0	2.0839	0	4.4987
550	TRUE	Empty	Collagen alpha-3(VI) chain OS=Homo sapiens OX=9606 GN=COL6A3 PE=1 SV=5	P12111	COL6A3	344 kDa		Homo sapiens	0	2.0839	0	0
551	TRUE	Empty	Signal transducer and activator of transcription 3 OS=Homo sapiens OX=9606 GN=STAT3 PE=1 SV=2	P40763	STAT3	88 kDa		Homo sapiens	0	0	1.7805	0
552	TRUE	Empty	Platelet-activating factor acetylhydrolase IB subunit alpha OS=Homo sapiens OX=9606 GN=PAFAH1B1 PE=1 SV=2	P43034	PAFAH1B1	47 kDa		Homo sapiens	0	1.3892	1.7805	0
553	TRUE	Empty	Superoxide dismutase [Cu-Zn] OS=Homo sapiens OX=9606 GN=SOD1 PE=1 SV=2	P00441	SOD1	16 kDa		Homo sapiens	0	2.7785	1.7805	0
554	TRUE	Empty	Eukaryotic translation initiation factor 6 OS=Homo sapiens OX=9606 GN=EIF6 PE=1 SV=1	P56537	EIF6	27 kDa		Homo sapiens	0	3.4731	0	2.2494
555	TRUE	Empty	Coatomer subunit epsilon OS=Homo sapiens OX=9606 GN=COPE PE=1 SV=3	O14579 (+1)	COPE	34 kDa		Homo sapiens	0	2.0839	0	2.9992
556	TRUE	Empty	Isoform 2 of Tropomyosin beta chain OS=Homo sapiens OX=9606 GN=TPM2	P07951-2	TPM2	33 kDa	TRUE	unknown	0	7.6409	11.573	0
557	TRUE	Empty	Peroxiredoxin-4 OS=Homo sapiens OX=9606 GN=PRDX4 PE=1 SV=1	Q13162	PRDX4	31 kDa	TRUE	Homo sapiens	0	0	7.1218	0
558	TRUE	Empty	Phosphoglucomutase-2 OS=Homo sapiens OX=9606 GN=PGM2 PE=1 SV=4	Q96G03	PGM2	68 kDa		Homo sapiens	0	0	3.5609	0
559	TRUE	Empty	40S ribosomal protein S19 OS=Homo sapiens OX=9606 GN=RPS19 PE=1 SV=2	P39019	RPS19	16 kDa		Homo sapiens	0	1.3892	2.6707	0
560	TRUE	Empty	Growth-regulated alpha protein OS=Homo sapiens OX=9606 GN=CXCL1 PE=1 SV=1	P09341	CXCL1	11 kDa		Homo sapiens	0	2.0839	0	3.7489
561	TRUE	Empty	Lamin-B1 OS=Homo sapiens OX=9606 GN=LMNB1 PE=1 SV=2	P20700	LMNB1	66 kDa		Homo sapiens	0	2.0839	0	2.9992
562	TRUE	Empty	Heterogeneous nuclear ribonucleoprotein F OS=Homo sapiens OX=9606 GN=HNRNPF PE=1 SV=3	P52597	HNRNPF	46 kDa	TRUE	Homo sapiens	0	5.557	0	5.2485
563	TRUE	Empty	Acetyl-CoA acetyltransferase, cytosolic OS=Homo sapiens OX=9606 GN=ACAT2 PE=1 SV=2	Q9BWD1	ACAT2	41 kDa		Homo sapiens	0	4.1677	0	3.7489
564	TRUE	Empty	Cystatin-M OS=Homo sapiens OX=9606 GN=CST6 PE=1 SV=1	Q15828	CST6	17 kDa		Homo sapiens	0	4.1677	3.5609	0
565	TRUE	Empty	60S ribosomal protein L5 OS=Homo sapiens OX=9606 GN=RPL5 PE=1 SV=3	P46777	RPL5	34 kDa		Homo sapiens	0	4.8624	2.6707	0
566	TRUE	Empty	ERO1-like protein alpha OS=Homo sapiens OX=9606 GN=ERO1A PE=1 SV=2	Q96HE7	ERO1A	54 kDa		Homo sapiens	0	0	4.4511	1.4996
567	TRUE	Empty	Junction plakoglobin OS=Homo sapiens OX=9606 GN=JUP PE=1 SV=3	P14923	JUP	82 kDa		Homo sapiens	38.701	0	1.7805	0
568	TRUE	Empty	40S ribosomal protein S8 OS=Homo sapiens OX=9606 GN=RPS8 PE=1 SV=2	P62241	RPS8	24 kDa		Homo sapiens	0	2.7785	3.5609	0
569	TRUE	Empty	40S ribosomal protein S13 OS=Homo sapiens OX=9606 GN=RPS13 PE=1 SV=2	P62277	RPS13	17 kDa		Homo sapiens	0	1.3892	1.7805	0
570	TRUE	Empty	Adenine phosphoribosyltransferase OS=Homo sapiens OX=9606 GN=APRT PE=1 SV=2	P07741	APRT	20 kDa		Homo sapiens	0	2.7785	2.6707	2.2494
571	TRUE	Empty	Eukaryotic translation initiation factor 3 subunit G OS=Homo sapiens OX=9606 GN=EIF3G PE=1 SV=2	O75821	EIF3G	36 kDa		Homo sapiens	0	1.3892	3.5609	2.9992
572	TRUE	Empty	Inactive tyrosine-protein kinase 7 OS=Homo sapiens OX=9606 GN=PTK7 PE=1 SV=2	Q13308 (+1)	PTK7	118 kDa		Homo sapiens	0	2.0839	1.7805	2.2494
573	TRUE	Empty	Serine/threonine-protein phosphatase CPPED1 OS=Homo sapiens OX=9606 GN=CPPED1 PE=1 SV=3	Q9BRF8	CPPED1	36 kDa		Homo sapiens	0	1.3892	3.5609	1.4996
574	TRUE	Empty	Thioredoxin domain-containing protein 17 OS=Homo sapiens OX=9606 GN=TXNDC17 PE=1 SV=1	Q9BRA2	TXNDC17	14 kDa		Homo sapiens	0	2.7785	1.7805	2.9992
575	TRUE	Empty	Twinfilin-1 OS=Homo sapiens OX=9606 GN=TWF1 PE=1 SV=3	Q12792	TWF1	40 kDa		Homo sapiens	0	2.0839	2.6707	2.2494
576	TRUE	Empty	Cysteine-rich protein 2 OS=Homo sapiens OX=9606 GN=CRIP2 PE=1 SV=1	P52943 (+1)	CRIP2	22 kDa		Homo sapiens	0	2.7785	1.7805	2.9992
577	TRUE	Empty	Hsp90 co-chaperone Cdc37 OS=Homo sapiens OX=9606 GN=CDC37 PE=1 SV=1	Q16543	CDC37	44 kDa		Homo sapiens	0	3.4731	1.7805	3.7489
578	TRUE	Empty	S-phase kinase-associated protein 1 OS=Homo sapiens OX=9606 GN=SKP1 PE=1 SV=2	P63208 (+1)	SKP1	19 kDa		Homo sapiens	0	2.0839	3.5609	1.4996
579	TRUE	Empty	SUMO-conjugating enzyme UBC9 OS=Homo sapiens OX=9606 GN=UBE2I PE=1 SV=1	P63279	UBE2I	18 kDa		Homo sapiens	0	2.0839	1.7805	2.9992
580	TRUE	Empty	RNA-binding protein 3 OS=Homo sapiens OX=9606 GN=RBM3 PE=1 SV=1	P98179	RBM3	17 kDa		Homo sapiens	0	2.0839	2.6707	3.7489
581	TRUE	Empty	Nucleoredoxin OS=Homo sapiens OX=9606 GN=NXN PE=1 SV=2	Q6DKJ4	NXN	48 kDa		Homo sapiens	0	1.3892	1.7805	1.4996
582	TRUE	Empty	Transportin-1 OS=Homo sapiens OX=9606 GN=TNPO1 PE=1 SV=2	Q92973 (+2)	TNPO1	102 kDa		Homo sapiens	0	2.0839	1.7805	2.2494
583	TRUE	Empty	Dynamin-2 OS=Homo sapiens OX=9606 GN=DNM2 PE=1 SV=2	P50570 (+4)	DNM2	98 kDa		Homo sapiens	0	2.0839	1.7805	1.4996
584	TRUE	Empty	Malignant T-cell-amplified sequence 1 OS=Homo sapiens OX=9606 GN=MCTS1 PE=1 SV=1	Q9ULC4 (+2)	MCTS1	21 kDa		Homo sapiens	0	2.7785	0	2.2494
585	TRUE	Empty	Actin-related protein 2/3 complex subunit 1B OS=Homo sapiens OX=9606 GN=ARPC1B PE=1 SV=3	O15143	ARPC1B	41 kDa	TRUE	Homo sapiens	0	0	2.6707	0
586	TRUE	Empty	Nuclease-sensitive element-binding protein 1 OS=Homo sapiens OX=9606 GN=YBX1 PE=1 SV=3	P67809	YBX1	36 kDa	TRUE	Homo sapiens	0	4.1677	7.1218	0
587	TRUE	Empty	Kinectin OS=Homo sapiens OX=9606 GN=KTN1 PE=1 SV=1	Q86UP2 (+3)	KTN1	156 kDa		Homo sapiens	0	0	0	1.4996
588	TRUE	Empty	Protein-L-isoaspartate(D-aspartate) O-methyltransferase OS=Homo sapiens OX=9606 GN=PCMT1 PE=1 SV=4	P22061 (+1)	PCMT1	25 kDa		Homo sapiens	0	1.3892	2.6707	0
589	TRUE	Empty	CTP synthase 1 OS=Homo sapiens OX=9606 GN=CTPS1 PE=1 SV=2	P17812 (+1)	CTPS1	67 kDa		Homo sapiens	0	2.0839	5.3414	0
590	TRUE	Empty	Cleavage and polyadenylation specificity factor subunit 6 OS=Homo sapiens OX=9606 GN=CPSF6 PE=1 SV=2	Q16630 (+2)	CPSF6	59 kDa		Homo sapiens	0	0	0	2.9992
591	TRUE	Empty	Receptor-type tyrosine-protein phosphatase kappa OS=Homo sapiens OX=9606 GN=PTPRK PE=1 SV=2	Q15262 (+3)	PTPRK	162 kDa		Homo sapiens	0	1.3892	0	2.9992
592	TRUE	Empty	Isoform D of Kinesin light chain 1 OS=Homo sapiens OX=9606 GN=KLC1	Q07866-10 (+3)	KLC1	70 kDa		unknown	0	1.3892	0	0
593	TRUE	Empty	Isoform 2 of Vacuolar protein sorting-associated protein 13D OS=Homo sapiens OX=9606 GN=VPS13D	Q5THJ4-2-DECOY		?		unknown	0	0	0	1.4996
594	TRUE	Empty	Isoform 2 of Calponin-2 OS=Homo sapiens OX=9606 GN=CNN2	Q99439-2	CNN2	30 kDa	TRUE	unknown	0	4.1677	0	2.9992
595	TRUE	Empty	Isoform 3 of Amyloid-like protein 2 OS=Homo sapiens OX=9606 GN=APLP2	Q06481-3 (+1)	APLP2	85 kDa		unknown	0	2.0839	0	2.9992
596	TRUE	Empty	Metalloproteinase inhibitor 1 OS=Homo sapiens OX=9606 GN=TIMP1 PE=1 SV=1	P01033	TIMP1	23 kDa		Homo sapiens	0	2.0839	0	5.2485
597	TRUE	Empty	Syndecan-4 OS=Homo sapiens OX=9606 GN=SDC4 PE=1 SV=2	P31431	SDC4	22 kDa		Homo sapiens	0	1.3892	0	2.9992
598	TRUE	Empty	C-1-tetrahydrofolate synthase, cytoplasmic OS=Homo sapiens OX=9606 GN=MTHFD1 PE=1 SV=3	P11586	MTHFD1	102 kDa		Homo sapiens	0	2.0839	0	2.2494
599	TRUE	Empty	Nuclear autoantigenic sperm protein OS=Homo sapiens OX=9606 GN=NASP PE=1 SV=2	P49321 (+1)	NASP	85 kDa		Homo sapiens	0	2.0839	0	2.2494
600	TRUE	Empty	Cadherin-13 OS=Homo sapiens OX=9606 GN=CDH13 PE=1 SV=1	P55290 (+1)	CDH13	78 kDa		Homo sapiens	0	2.7785	0	5.2485
601	TRUE	Empty	Eukaryotic initiation factor 4A-II OS=Homo sapiens OX=9606 GN=EIF4A2 PE=1 SV=2	Q14240 (+1)	EIF4A2	46 kDa	TRUE	Homo sapiens	0	8.3355	10.683	0
602	TRUE	Empty	Isoform 2 of Low-density lipoprotein receptor OS=Homo sapiens OX=9606 GN=LDLR	P01130-2	LDLR	76 kDa		unknown	0	0	0	4.4987
603	TRUE	Empty	Protein S100-A10 OS=Homo sapiens OX=9606 GN=S100A10 PE=1 SV=2	P60903	S100A10	11 kDa		Homo sapiens	0	0	0	2.2494
604	TRUE	Empty	Hemoglobin subunit beta OS=Homo sapiens OX=9606 GN=HBB PE=1 SV=2	P68871	HBB	16 kDa		Homo sapiens	29.026	0	1.7805	0
605	TRUE	Empty	Trypsin-1 OS=Homo sapiens OX=9606 GN=PRSS1 PE=1 SV=1	P07477 (+2)	PRSS1	27 kDa		Homo sapiens	29.026	0	0	0
606	TRUE	Empty	10 kDa heat shock protein, mitochondrial OS=Homo sapiens OX=9606 GN=HSPE1 PE=1 SV=2	P61604	HSPE1	11 kDa		Homo sapiens	0	1.3892	0	2.2494
607	TRUE	Empty	Nuclear migration protein nudC OS=Homo sapiens OX=9606 GN=NUDC PE=1 SV=1	Q9Y266	NUDC	38 kDa		Homo sapiens	0	1.3892	0	1.4996
608	TRUE	Empty	Cytosol aminopeptidase OS=Homo sapiens OX=9606 GN=LAP3 PE=1 SV=3	P28838	LAP3	56 kDa		Homo sapiens	0	0	2.6707	2.2494
609	TRUE	Empty	DNA-(apurinic or apyrimidinic site) lyase OS=Homo sapiens OX=9606 GN=APEX1 PE=1 SV=2	P27695	APEX1	36 kDa		Homo sapiens	0	2.0839	0	2.2494
610	TRUE	Empty	S-methyl-5'-thioadenosine phosphorylase OS=Homo sapiens OX=9606 GN=MTAP PE=1 SV=2	Q13126 (+3)	MTAP	31 kDa		Homo sapiens	0	2.7785	2.6707	2.2494
611	TRUE	Empty	Chromobox protein homolog 3 OS=Homo sapiens OX=9606 GN=CBX3 PE=1 SV=4	Q13185	CBX3	21 kDa	TRUE	Homo sapiens	0	2.7785	1.7805	2.9992
612	TRUE	Empty	Glyoxalase domain-containing protein 4 OS=Homo sapiens OX=9606 GN=GLOD4 PE=1 SV=1	Q9HC38 (+1)	GLOD4	35 kDa		Homo sapiens	0	2.7785	3.5609	1.4996
613	TRUE	Empty	Protein FAM49B OS=Homo sapiens OX=9606 GN=FAM49B PE=1 SV=1	Q9NUQ9 (+1)	FAM49B	37 kDa		Homo sapiens	0	1.3892	3.5609	1.4996
614	TRUE	Empty	Prefoldin subunit 2 OS=Homo sapiens OX=9606 GN=PFDN2 PE=1 SV=1	Q9UHV9	PFDN2	17 kDa		Homo sapiens	0	1.3892	1.7805	1.4996
615	TRUE	Empty	Isoform 15 of Fibronectin OS=Homo sapiens OX=9606 GN=FN1	P02751-15	FN1	272 kDa	TRUE	unknown	0	286.88	168.25	323.91
616	TRUE	Empty	26S proteasome non-ATPase regulatory subunit 7 OS=Homo sapiens OX=9606 GN=PSMD7 PE=1 SV=2	P51665	PSMD7	37 kDa		Homo sapiens	0	2.0839	0	2.2494
617	TRUE	Empty	Apoptosis inhibitor 5 OS=Homo sapiens OX=9606 GN=API5 PE=1 SV=3	Q9BZZ5 (+2)	API5	59 kDa		Homo sapiens	0	2.0839	0	3.7489
618	TRUE	Empty	Small nuclear ribonucleoprotein Sm D1 OS=Homo sapiens OX=9606 GN=SNRPD1 PE=1 SV=1	P62314	SNRPD1	13 kDa		Homo sapiens	0	2.0839	0	0
619	TRUE	Empty	Aminopeptidase B OS=Homo sapiens OX=9606 GN=RNPEP PE=1 SV=2	Q9H4A4	RNPEP	73 kDa		Homo sapiens	0	2.0839	1.7805	0
620	TRUE	Empty	Sialic acid synthase OS=Homo sapiens OX=9606 GN=NANS PE=1 SV=2	Q9NR45	NANS	40 kDa		Homo sapiens	0	2.7785	3.5609	0
621	TRUE	Empty	Glutathione reductase, mitochondrial OS=Homo sapiens OX=9606 GN=GSR PE=1 SV=2	P00390 (+2)	GSR	56 kDa		Homo sapiens	0	2.0839	0	2.9992
622	TRUE	Empty	Ras-related protein Rab-11B OS=Homo sapiens OX=9606 GN=RAB11B PE=1 SV=4	Q15907 (+1)	RAB11B	24 kDa	TRUE	Homo sapiens	0	2.7785	0	2.2494
623	TRUE	Empty	Reticulon-4 OS=Homo sapiens OX=9606 GN=RTN4 PE=1 SV=2	Q9NQC3 (+2)	RTN4	130 kDa		Homo sapiens	0	3.4731	0	2.9992
624	TRUE	Empty	Adenylosuccinate synthetase isozyme 2 OS=Homo sapiens OX=9606 GN=ADSS PE=1 SV=3	P30520	ADSS	50 kDa		Homo sapiens	0	1.3892	0	1.4996
625	TRUE	Empty	Proliferating cell nuclear antigen OS=Homo sapiens OX=9606 GN=PCNA PE=1 SV=1	P12004	PCNA	29 kDa		Homo sapiens	0	2.0839	0	2.9992
626	TRUE	Empty	Collagen alpha-1(XXVII) chain OS=Homo sapiens OX=9606 GN=COL27A1 PE=1 SV=1	Q8IZC6	COL27A1	187 kDa		Homo sapiens	0	0	0	1.4996
627	TRUE	Empty	Protein CYR61 OS=Homo sapiens OX=9606 GN=CYR61 PE=1 SV=1	O00622	CYR61	42 kDa		Homo sapiens	0	2.0839	0	3.7489
628	TRUE	Empty	Non-POU domain-containing octamer-binding protein OS=Homo sapiens OX=9606 GN=NONO PE=1 SV=4	Q15233 (+1)	NONO	54 kDa	TRUE	Homo sapiens	0	0	0	1.4996
629	TRUE	Empty	Alpha-soluble NSF attachment protein OS=Homo sapiens OX=9606 GN=NAPA PE=1 SV=3	P54920	NAPA	33 kDa		Homo sapiens	0	2.0839	0	0
630	TRUE	Empty	Gamma-enolase OS=Homo sapiens OX=9606 GN=ENO2 PE=1 SV=3	P09104 (+1)	ENO2	47 kDa	TRUE	Homo sapiens	0	6.9462	0	5.9983
631	TRUE	Empty	HLA class I histocompatibility antigen, A-2 alpha chain OS=Homo sapiens OX=9606 GN=HLA-A PE=1 SV=1	P01892	HLA-A	41 kDa	TRUE	Homo sapiens	0	2.7785	0	2.9992
632	TRUE	Empty	Inactive C-alpha-formylglycine-generating enzyme 2 OS=Homo sapiens OX=9606 GN=SUMF2 PE=1 SV=2	Q8NBJ7	SUMF2	34 kDa		Homo sapiens	0	1.3892	6.2316	0
633	TRUE	Empty	Hypoxanthine-guanine phosphoribosyltransferase OS=Homo sapiens OX=9606 GN=HPRT1 PE=1 SV=2	P00492	HPRT1	25 kDa		Homo sapiens	0	2.0839	0	2.9992
634	TRUE	Empty	Interstitial collagenase OS=Homo sapiens OX=9606 GN=MMP1 PE=1 SV=3	P03956	MMP1	54 kDa		Homo sapiens	0	2.7785	0	2.9992
635	TRUE	Empty	Poliovirus receptor OS=Homo sapiens OX=9606 GN=PVR PE=1 SV=2	P15151 (+3)	PVR	45 kDa		Homo sapiens	0	2.0839	0	2.2494
636	TRUE	Empty	Protein-lysine 6-oxidase OS=Homo sapiens OX=9606 GN=LOX PE=1 SV=2	P28300	LOX	47 kDa		Homo sapiens	0	4.1677	0	2.9992
637	TRUE	Empty	Leucine-rich repeat neuronal protein 4 OS=Homo sapiens OX=9606 GN=LRRN4 PE=1 SV=3	Q8WUT4	LRRN4	79 kDa		Homo sapiens	0	1.3892	0	3.7489
638	TRUE	Empty	Collagen alpha-2(VI) chain OS=Homo sapiens OX=9606 GN=COL6A2 PE=1 SV=4	P12110	COL6A2	109 kDa		Homo sapiens	0	0	0	6.7481
639	TRUE	Empty	40S ribosomal protein S6 OS=Homo sapiens OX=9606 GN=RPS6 PE=1 SV=1	P62753	RPS6	29 kDa		Homo sapiens	0	1.3892	2.6707	0
640	TRUE	Empty	40S ribosomal protein S20 OS=Homo sapiens OX=9606 GN=RPS20 PE=1 SV=1	P60866 (+1)	RPS20	13 kDa		Homo sapiens	0	1.3892	1.7805	1.4996
641	TRUE	Empty	PRKC apoptosis WT1 regulator protein OS=Homo sapiens OX=9606 GN=PAWR PE=1 SV=1	Q96IZ0	PAWR	37 kDa		Homo sapiens	0	1.3892	0	0
642	TRUE	Empty	Fatty acid-binding protein 5 OS=Homo sapiens OX=9606 GN=FABP5 PE=1 SV=3	Q01469	FABP5	15 kDa		Homo sapiens	0	1.3892	1.7805	0
643	TRUE	Empty	Dermcidin OS=Homo sapiens OX=9606 GN=DCD PE=1 SV=2	P81605	DCD	11 kDa		Homo sapiens	38.701	0	2.6707	1.4996
644	TRUE	Empty	60S ribosomal protein L27 OS=Homo sapiens OX=9606 GN=RPL27 PE=1 SV=2	P61353	RPL27	16 kDa		Homo sapiens	0	1.3892	2.6707	0
645	TRUE	Empty	Proteasome subunit beta type-6 OS=Homo sapiens OX=9606 GN=PSMB6 PE=1 SV=4	P28072	PSMB6	25 kDa		Homo sapiens	0	2.0839	2.6707	1.4996
646	TRUE	Empty	Abl interactor 1 OS=Homo sapiens OX=9606 GN=ABI1 PE=1 SV=4	Q8IZP0 (+7)	ABI1	55 kDa		Homo sapiens	0	1.3892	1.7805	0
647	TRUE	Empty	Desmocollin-3 OS=Homo sapiens OX=9606 GN=DSC3 PE=1 SV=3	Q14574 (+1)	DSC3	100 kDa		Homo sapiens	0	0	1.7805	0
648	TRUE	Empty	Platelet-activating factor acetylhydrolase IB subunit beta OS=Homo sapiens OX=9606 GN=PAFAH1B2 PE=1 SV=1	P68402 (+3)	PAFAH1B2	26 kDa		Homo sapiens	0	2.7785	2.6707	2.2494
649	TRUE	Empty	1,4-alpha-glucan-branching enzyme OS=Homo sapiens OX=9606 GN=GBE1 PE=1 SV=3	Q04446	GBE1	80 kDa		Homo sapiens	0	2.0839	2.6707	1.4996
650	TRUE	Empty	Ribonuclease inhibitor OS=Homo sapiens OX=9606 GN=RNH1 PE=1 SV=2	P13489	RNH1	50 kDa		Homo sapiens	0	1.3892	2.6707	2.2494
651	TRUE	Empty	Peptidyl-prolyl cis-trans isomerase FKBP4 OS=Homo sapiens OX=9606 GN=FKBP4 PE=1 SV=3	Q02790	FKBP4	52 kDa		Homo sapiens	0	2.0839	3.5609	1.4996
652	TRUE	Empty	Mesencephalic astrocyte-derived neurotrophic factor OS=Homo sapiens OX=9606 GN=MANF PE=1 SV=3	P55145	MANF	21 kDa		Homo sapiens	0	2.7785	3.5609	1.4996
653	TRUE	Empty	Wiskott-Aldrich syndrome protein family member 2 OS=Homo sapiens OX=9606 GN=WASF2 PE=1 SV=3	Q9Y6W5	WASF2	54 kDa		Homo sapiens	0	2.0839	1.7805	2.2494
654	TRUE	Empty	Protein transport protein Sec23A OS=Homo sapiens OX=9606 GN=SEC23A PE=1 SV=2	Q15436	SEC23A	86 kDa		Homo sapiens	0	1.3892	1.7805	2.9992
655	TRUE	Empty	Putative Ras-related protein Rab-1C OS=Homo sapiens OX=9606 GN=RAB1C PE=5 SV=2	Q92928 (+1)	RAB1C	22 kDa	TRUE	Homo sapiens	0	1.3892	1.7805	1.4996
656	TRUE	Empty	Serine/arginine-rich splicing factor 2 OS=Homo sapiens OX=9606 GN=SRSF2 PE=1 SV=4	Q01130 (+1)	SRSF2	25 kDa		Homo sapiens	0	1.3892	1.7805	2.9992
657	TRUE	Empty	6-phosphogluconolactonase OS=Homo sapiens OX=9606 GN=PGLS PE=1 SV=2	O95336	PGLS	28 kDa		Homo sapiens	0	2.7785	1.7805	1.4996
658	TRUE	Empty	Uroporphyrinogen decarboxylase OS=Homo sapiens OX=9606 GN=UROD PE=1 SV=2	P06132	UROD	41 kDa		Homo sapiens	0	2.7785	1.7805	1.4996
659	TRUE	Empty	NADP-dependent malic enzyme OS=Homo sapiens OX=9606 GN=ME1 PE=1 SV=1	P48163 (+1)	ME1	64 kDa		Homo sapiens	0	2.0839	2.6707	2.2494
660	TRUE	Empty	Jupiter microtubule associated homolog 1 OS=Homo sapiens OX=9606 GN=JPT1 PE=1 SV=3	Q9UK76	JPT1	16 kDa		Homo sapiens	0	2.0839	1.7805	1.4996
661	TRUE	Empty	S-formylglutathione hydrolase OS=Homo sapiens OX=9606 GN=ESD PE=1 SV=2	P10768	ESD	31 kDa		Homo sapiens	0	1.3892	1.7805	1.4996
662	TRUE	Empty	Pregnancy-specific beta-1-glycoprotein 4 OS=Homo sapiens OX=9606 GN=PSG4 PE=2 SV=3	Q00888	PSG4	47 kDa	TRUE	Homo sapiens	0	2.0839	1.7805	1.4996
663	TRUE	Empty	Probable ATP-dependent RNA helicase DDX6 OS=Homo sapiens OX=9606 GN=DDX6 PE=1 SV=2	P26196	DDX6	54 kDa		Homo sapiens	0	1.3892	2.6707	1.4996
664	TRUE	Empty	Protein phosphatase 1 regulatory subunit 7 OS=Homo sapiens OX=9606 GN=PPP1R7 PE=1 SV=1	Q15435 (+1)	PPP1R7	42 kDa		Homo sapiens	0	0	0	1.4996
665	TRUE	Empty	Leucine-rich repeat flightless-interacting protein 1 OS=Homo sapiens OX=9606 GN=LRRFIP1 PE=1 SV=2	Q32MZ4 (+1)	LRRFIP1	89 kDa		Homo sapiens	0	2.7785	1.7805	0
666	TRUE	Empty	5'(3')-deoxyribonucleotidase, cytosolic type OS=Homo sapiens OX=9606 GN=NT5C PE=1 SV=2	Q8TCD5 (+1)	NT5C	23 kDa		Homo sapiens	0	2.7785	0	1.4996
667	TRUE	Empty	C-Jun-amino-terminal kinase-interacting protein 4 OS=Homo sapiens OX=9606 GN=SPAG9 PE=1 SV=4	O60271 (+2)	SPAG9	146 kDa		Homo sapiens	0	1.3892	2.6707	0
668	TRUE	Empty	60 kDa SS-A/Ro ribonucleoprotein OS=Homo sapiens OX=9606 GN=TROVE2 PE=1 SV=2	P10155 (+3)	TROVE2	61 kDa		Homo sapiens	0	1.3892	1.7805	0
669	TRUE	Empty	Eukaryotic peptide chain release factor subunit 1 OS=Homo sapiens OX=9606 GN=ETF1 PE=1 SV=3	P62495	ETF1	49 kDa		Homo sapiens	0	1.3892	1.7805	0
670	TRUE	Empty	Dual specificity protein phosphatase 3 OS=Homo sapiens OX=9606 GN=DUSP3 PE=1 SV=1	P51452	DUSP3	20 kDa		Homo sapiens	0	1.3892	0	0
671	TRUE	Empty	60S ribosomal protein L7 OS=Homo sapiens OX=9606 GN=RPL7 PE=1 SV=1	P18124	RPL7	29 kDa		Homo sapiens	0	0	2.6707	0
672	TRUE	Empty	Ubiquitin carboxyl-terminal hydrolase isozyme L3 OS=Homo sapiens OX=9606 GN=UCHL3 PE=1 SV=1	P15374	UCHL3	26 kDa		Homo sapiens	0	0	2.6707	0
673	TRUE	Empty	Importin-7 OS=Homo sapiens OX=9606 GN=IPO7 PE=1 SV=1	O95373	IPO7	120 kDa		Homo sapiens	0	2.7785	2.6707	0
674	TRUE	Empty	Thioredoxin-like protein 1 OS=Homo sapiens OX=9606 GN=TXNL1 PE=1 SV=3	O43396	TXNL1	32 kDa		Homo sapiens	0	1.3892	0	2.9992
675	TRUE	Empty	Syntenin-1 OS=Homo sapiens OX=9606 GN=SDCBP PE=1 SV=1	O00560	SDCBP	32 kDa		Homo sapiens	0	1.3892	0	3.7489
676	TRUE	Empty	Adenylate kinase isoenzyme 1 OS=Homo sapiens OX=9606 GN=AK1 PE=1 SV=3	P00568	AK1	22 kDa		Homo sapiens	0	2.7785	3.5609	0
677	TRUE	Empty	Proteasome subunit beta type-3 OS=Homo sapiens OX=9606 GN=PSMB3 PE=1 SV=2	P49720	PSMB3	23 kDa		Homo sapiens	0	0	3.5609	2.2494
678	TRUE	Empty	Lysine--tRNA ligase OS=Homo sapiens OX=9606 GN=KARS PE=1 SV=3	Q15046 (+1)	KARS	68 kDa		Homo sapiens	0	0	0	1.4996
679	TRUE	Empty	BRO1 domain-containing protein BROX OS=Homo sapiens OX=9606 GN=BROX PE=1 SV=1	Q5VW32	BROX	46 kDa		Homo sapiens	0	2.0839	0	0
680	TRUE	Empty	Serine/threonine-protein phosphatase 2B catalytic subunit alpha isoform OS=Homo sapiens OX=9606 GN=PPP3CA PE=1 SV=1	Q08209 (+2)	PPP3CA	59 kDa		Homo sapiens	0	0	1.7805	0
681	TRUE	Empty	Importin subunit alpha-3 OS=Homo sapiens OX=9606 GN=KPNA4 PE=1 SV=1	O00629	KPNA4	58 kDa	TRUE	Homo sapiens	0	0	2.6707	0
682	TRUE	Empty	Polyadenylate-binding protein 4 OS=Homo sapiens OX=9606 GN=PABPC4 PE=1 SV=1	Q13310 (+2)	PABPC4	71 kDa	TRUE	Homo sapiens	0	3.4731	0	0
683	TRUE	Empty	Disintegrin and metalloproteinase domain-containing protein 9 OS=Homo sapiens OX=9606 GN=ADAM9 PE=1 SV=1	Q13443	ADAM9	91 kDa		Homo sapiens	0	2.0839	0	2.2494
684	TRUE	Empty	Isoform 2 of Cold-inducible RNA-binding protein OS=Homo sapiens OX=9606 GN=CIRBP	Q14011-2	CIRBP	28 kDa		unknown	0	2.7785	0	2.2494
685	TRUE	Empty	Cyclin-dependent kinase 6 OS=Homo sapiens OX=9606 GN=CDK6 PE=1 SV=1	Q00534	CDK6	37 kDa		Homo sapiens	0	1.3892	3.5609	0
686	TRUE	Empty	Far upstream element-binding protein 1 OS=Homo sapiens OX=9606 GN=FUBP1 PE=1 SV=3	Q96AE4 (+1)	FUBP1	68 kDa		Homo sapiens	0	1.3892	0	2.9992
687	TRUE	Empty	Isoform 4 of Tumor protein D54 OS=Homo sapiens OX=9606 GN=TPD52L2	O43399-4 (+1)	TPD52L2	21 kDa		unknown	0	2.0839	0	1.4996
688	TRUE	Empty	Olfactomedin-like protein 3 OS=Homo sapiens OX=9606 GN=OLFML3 PE=2 SV=1	Q9NRN5	OLFML3	46 kDa		Homo sapiens	0	3.4731	1.7805	0
689	TRUE	Empty	Golgi membrane protein 1 OS=Homo sapiens OX=9606 GN=GOLM1 PE=1 SV=1	Q8NBJ4	GOLM1	45 kDa		Homo sapiens	0	1.3892	0	1.4996
690	TRUE	Empty	Beta-1,3-N-acetylglucosaminyltransferase lunatic fringe OS=Homo sapiens OX=9606 GN=LFNG PE=1 SV=2	Q8NES3 (+1)	LFNG	42 kDa		Homo sapiens	0	0	0	2.2494
691	TRUE	Empty	Hsc70-interacting protein OS=Homo sapiens OX=9606 GN=ST13 PE=1 SV=2	P50502	ST13	41 kDa		Homo sapiens	0	2.0839	0	2.2494
692	TRUE	Empty	Cadherin-1 OS=Homo sapiens OX=9606 GN=CDH1 PE=1 SV=3	P12830	CDH1	97 kDa		Homo sapiens	0	1.3892	3.5609	0
693	TRUE	Empty	Isoform 6 of Poly(U)-binding-splicing factor PUF60 OS=Homo sapiens OX=9606 GN=PUF60	Q9UHX1-6	PUF60	55 kDa		unknown	0	0	0	1.4996
694	TRUE	Empty	Plasma protease C1 inhibitor OS=Homo sapiens OX=9606 GN=SERPING1 PE=1 SV=2	P05155 (+1)	SERPING1	55 kDa		Homo sapiens	0	2.7785	2.6707	0
695	TRUE	Empty	Importin subunit alpha-1 OS=Homo sapiens OX=9606 GN=KPNA2 PE=1 SV=1	P52292	KPNA2	58 kDa		Homo sapiens	0	2.7785	0	3.7489
696	TRUE	Empty	Isoform 3 of Zinc finger protein 185 OS=Homo sapiens OX=9606 GN=ZNF185	O15231-3	ZNF185	74 kDa		unknown	0	1.3892	4.4511	0
697	TRUE	Empty	Tissue-type plasminogen activator OS=Homo sapiens OX=9606 GN=PLAT PE=1 SV=1	P00750 (+1)	PLAT	63 kDa		Homo sapiens	0	1.3892	0	1.4996
698	TRUE	Empty	Multifunctional protein ADE2 OS=Homo sapiens OX=9606 GN=PAICS PE=1 SV=3	P22234	PAICS	47 kDa		Homo sapiens	0	0	0	1.4996
699	TRUE	Empty	Renin receptor OS=Homo sapiens OX=9606 GN=ATP6AP2 PE=1 SV=2	O75787 (+1)	ATP6AP2	39 kDa		Homo sapiens	0	0	0	2.9992
700	TRUE	Empty	Annexin A8-like protein 1 OS=Homo sapiens OX=9606 GN=ANXA8L1 PE=2 SV=2	Q5VT79	ANXA8L1	37 kDa		Homo sapiens	0	0	2.6707	0
701	TRUE	Empty	Nicotinate-nucleotide pyrophosphorylase [carboxylating] OS=Homo sapiens OX=9606 GN=QPRT PE=1 SV=3	Q15274	QPRT	31 kDa		Homo sapiens	0	0	0	2.9992
702	TRUE	Empty	Collagen alpha-1(XXVII) chain OS=Homo sapiens OX=9606 GN=COL27A1 PE=1 SV=1	Q8IZC6-DECOY		?		unknown	0	0	0	2.2494
703	TRUE	Empty	ADP-ribosylation factor 4 OS=Homo sapiens OX=9606 GN=ARF4 PE=1 SV=3	P18085	ARF4	21 kDa	TRUE	Homo sapiens	0	0	3.5609	0
704	TRUE	Empty	40S ribosomal protein S10 OS=Homo sapiens OX=9606 GN=RPS10 PE=1 SV=1	P46783	RPS10	19 kDa		Homo sapiens	0	0	1.7805	2.2494
705	TRUE	Empty	Trifunctional purine biosynthetic protein adenosine-3 OS=Homo sapiens OX=9606 GN=GART PE=1 SV=1	P22102	GART	108 kDa		Homo sapiens	0	1.3892	1.7805	1.4996
706	TRUE	Empty	Annexin A5 OS=Homo sapiens OX=9606 GN=ANXA5 PE=1 SV=2	P08758	ANXA5	36 kDa		Homo sapiens	0	0	3.5609	0
707	TRUE	Empty	Thioredoxin-dependent peroxide reductase, mitochondrial OS=Homo sapiens OX=9606 GN=PRDX3 PE=1 SV=3	P30048	PRDX3	28 kDa		Homo sapiens	0	0	0	2.2494
708	TRUE	Empty	26S proteasome regulatory subunit 4 OS=Homo sapiens OX=9606 GN=PSMC1 PE=1 SV=1	P62191 (+1)	PSMC1	49 kDa		Homo sapiens	0	2.0839	2.6707	1.4996
709	TRUE	Empty	2'-deoxynucleoside 5'-phosphate N-hydrolase 1 OS=Homo sapiens OX=9606 GN=DNPH1 PE=1 SV=1	O43598	DNPH1	19 kDa		Homo sapiens	0	2.0839	2.6707	1.4996
710	TRUE	Empty	General vesicular transport factor p115 OS=Homo sapiens OX=9606 GN=USO1 PE=1 SV=2	O60763 (+1)	USO1	108 kDa		Homo sapiens	0	2.0839	2.6707	1.4996
711	TRUE	Empty	Proteasome subunit alpha type-6 OS=Homo sapiens OX=9606 GN=PSMA6 PE=1 SV=1	P60900	PSMA6	27 kDa		Homo sapiens	0	1.3892	2.6707	1.4996
712	TRUE	Empty	Ras-related protein Rab-5C OS=Homo sapiens OX=9606 GN=RAB5C PE=1 SV=2	P51148 (+1)	RAB5C	23 kDa		Homo sapiens	0	1.3892	1.7805	1.4996
713	TRUE	Empty	Isoform 2AC of Catenin delta-1 OS=Homo sapiens OX=9606 GN=CTNND1	O60716-11 (+11)	CTNND1	99 kDa		unknown	0	1.3892	1.7805	2.2494
714	TRUE	Empty	Tubulin alpha-1A chain OS=Homo sapiens OX=9606 GN=TUBA1A PE=1 SV=1	Q71U36 (+1)	TUBA1A	50 kDa	TRUE	Homo sapiens	0	27.09	34.719	26.992
715	TRUE	Empty	Cell division control protein 42 homolog OS=Homo sapiens OX=9606 GN=CDC42 PE=1 SV=2	P60953	CDC42	21 kDa		Homo sapiens	0	2.0839	1.7805	2.2494
716	TRUE	Empty	40S ribosomal protein S5 OS=Homo sapiens OX=9606 GN=RPS5 PE=1 SV=4	P46782	RPS5	23 kDa		Homo sapiens	0	2.7785	2.6707	0
717	TRUE	Empty	Alpha-parvin OS=Homo sapiens OX=9606 GN=PARVA PE=1 SV=1	Q9NVD7	PARVA	42 kDa		Homo sapiens	0	1.3892	0	0
718	TRUE	Empty	Isoform IIb of Profilin-2 OS=Homo sapiens OX=9606 GN=PFN2	P35080-2	PFN2	15 kDa		unknown	0	2.0839	1.7805	0
719	TRUE	Empty	Actin-related protein 2/3 complex subunit 5 OS=Homo sapiens OX=9606 GN=ARPC5 PE=1 SV=3	O15511	ARPC5	16 kDa	TRUE	Homo sapiens	0	2.0839	1.7805	0
720	TRUE	Empty	Alpha-2-macroglobulin OS=Homo sapiens OX=9606 GN=A2M PE=1 SV=3	P01023	A2M	163 kDa		Homo sapiens	0	0	1.7805	0
721	TRUE	Empty	Protein enabled homolog OS=Homo sapiens OX=9606 GN=ENAH PE=1 SV=2	Q8N8S7 (+2)	ENAH	67 kDa		Homo sapiens	0	0	0	2.2494
722	TRUE	Empty	Beta-hexosaminidase subunit beta OS=Homo sapiens OX=9606 GN=HEXB PE=1 SV=3	P07686	HEXB	63 kDa		Homo sapiens	0	1.3892	0	2.2494
723	TRUE	Empty	Myotrophin OS=Homo sapiens OX=9606 GN=MTPN PE=1 SV=2	P58546	MTPN	13 kDa		Homo sapiens	0	2.0839	0	2.2494
724	TRUE	Empty	BH3-interacting domain death agonist OS=Homo sapiens OX=9606 GN=BID PE=1 SV=1	P55957 (+1)	BID	22 kDa		Homo sapiens	0	2.0839	0	2.2494
725	TRUE	Empty	Osteoclast-stimulating factor 1 OS=Homo sapiens OX=9606 GN=OSTF1 PE=1 SV=2	Q92882	OSTF1	24 kDa		Homo sapiens	0	2.0839	1.7805	0
726	TRUE	Empty	Ubiquitin-conjugating enzyme E2 variant 2 OS=Homo sapiens OX=9606 GN=UBE2V2 PE=1 SV=4	Q15819	UBE2V2	16 kDa	TRUE	Homo sapiens	0	1.3892	3.5609	0
727	TRUE	Empty	COP9 signalosome complex subunit 4 OS=Homo sapiens OX=9606 GN=COPS4 PE=1 SV=1	Q9BT78	COPS4	46 kDa		Homo sapiens	0	2.0839	0	0
728	TRUE	Empty	DNA damage-binding protein 1 OS=Homo sapiens OX=9606 GN=DDB1 PE=1 SV=1	Q16531	DDB1	127 kDa		Homo sapiens	0	0	3.5609	0
729	TRUE	Empty	Prostaglandin reductase 1 OS=Homo sapiens OX=9606 GN=PTGR1 PE=1 SV=2	Q14914	PTGR1	36 kDa		Homo sapiens	0	0	0	2.2494
730	TRUE	Empty	Activated RNA polymerase II transcriptional coactivator p15 OS=Homo sapiens OX=9606 GN=SUB1 PE=1 SV=3	P53999	SUB1	14 kDa		Homo sapiens	0	1.3892	0	1.4996
731	TRUE	Empty	Eukaryotic translation initiation factor 4B OS=Homo sapiens OX=9606 GN=EIF4B PE=1 SV=2	P23588	EIF4B	69 kDa		Homo sapiens	0	2.0839	0	1.4996
732	TRUE	Empty	Tissue alpha-L-fucosidase OS=Homo sapiens OX=9606 GN=FUCA1 PE=1 SV=4	P04066	FUCA1	54 kDa		Homo sapiens	0	0	0	1.4996
733	TRUE	Empty	Leukocyte elastase inhibitor OS=Homo sapiens OX=9606 GN=SERPINB1 PE=1 SV=1	P30740	SERPINB1	43 kDa		Homo sapiens	0	2.0839	1.7805	0
734	TRUE	Empty	26S proteasome non-ATPase regulatory subunit 13 OS=Homo sapiens OX=9606 GN=PSMD13 PE=1 SV=2	Q9UNM6 (+1)	PSMD13	43 kDa		Homo sapiens	0	0	2.6707	0
735	TRUE	Empty	60S ribosomal protein L7a OS=Homo sapiens OX=9606 GN=RPL7A PE=1 SV=2	P62424	RPL7A	30 kDa		Homo sapiens	0	0	1.7805	0
736	TRUE	Empty	60S ribosomal protein L17 OS=Homo sapiens OX=9606 GN=RPL17 PE=1 SV=3	P18621 (+1)	RPL17	21 kDa		Homo sapiens	0	2.0839	2.6707	0
737	TRUE	Empty	Growth arrest-specific protein 6 OS=Homo sapiens OX=9606 GN=GAS6 PE=1 SV=2	Q14393 (+1)	GAS6	80 kDa		Homo sapiens	0	0	2.6707	0
738	TRUE	Empty	Cytoplasmic aconitate hydratase OS=Homo sapiens OX=9606 GN=ACO1 PE=1 SV=3	P21399	ACO1	98 kDa		Homo sapiens	0	1.3892	0	1.4996
739	TRUE	Empty	Protein phosphatase methylesterase 1 OS=Homo sapiens OX=9606 GN=PPME1 PE=1 SV=3	Q9Y570 (+1)	PPME1	42 kDa		Homo sapiens	0	0	0	1.4996
740	TRUE	Empty	von Willebrand factor A domain-containing protein 5A OS=Homo sapiens OX=9606 GN=VWA5A PE=2 SV=2	O00534	VWA5A	86 kDa		Homo sapiens	0	1.3892	4.4511	0
741	TRUE	Empty	Mitochondrial fission 1 protein OS=Homo sapiens OX=9606 GN=FIS1 PE=1 SV=2	Q9Y3D6	FIS1	17 kDa		Homo sapiens	0	3.4731	0	2.2494
742	TRUE	Empty	Transforming growth factor beta-2 OS=Homo sapiens OX=9606 GN=TGFB2 PE=1 SV=1	P61812 (+1)	TGFB2	48 kDa		Homo sapiens	0	0	0	1.4996
743	TRUE	Empty	Isoform 3 of Cysteine--tRNA ligase, cytoplasmic OS=Homo sapiens OX=9606 GN=CARS	P49589-3	CARS	95 kDa		unknown	0	1.3892	0	0
744	TRUE	Empty	Fumarate hydratase, mitochondrial OS=Homo sapiens OX=9606 GN=FH PE=1 SV=3	P07954 (+1)	FH	55 kDa		Homo sapiens	0	2.0839	0	2.9992
745	TRUE	Empty	Collagen alpha-1(XI) chain OS=Homo sapiens OX=9606 GN=COL11A1 PE=1 SV=4	P12107 (+3)	COL11A1	181 kDa		Homo sapiens	0	0	0	1.4996
746	TRUE	Empty	Pentraxin-related protein PTX3 OS=Homo sapiens OX=9606 GN=PTX3 PE=1 SV=3	P26022	PTX3	42 kDa		Homo sapiens	0	2.0839	0	2.2494
747	TRUE	Empty	Small proline-rich protein 3 OS=Homo sapiens OX=9606 GN=SPRR3 PE=1 SV=2	Q9UBC9	SPRR3	18 kDa		Homo sapiens	0	2.0839	5.3414	0
748	TRUE	Empty	EH domain-containing protein 2 OS=Homo sapiens OX=9606 GN=EHD2 PE=1 SV=2	Q9NZN4	EHD2	61 kDa	TRUE	Homo sapiens	0	2.0839	2.6707	0
749	TRUE	Empty	THO complex subunit 4 OS=Homo sapiens OX=9606 GN=ALYREF PE=1 SV=3	Q86V81	ALYREF	27 kDa		Homo sapiens	0	2.7785	0	0
750	TRUE	Empty	Procollagen galactosyltransferase 1 OS=Homo sapiens OX=9606 GN=COLGALT1 PE=1 SV=1	Q8NBJ5	COLGALT1	72 kDa		Homo sapiens	0	0	2.6707	0
751	TRUE	Empty	Adipocyte enhancer-binding protein 1 OS=Homo sapiens OX=9606 GN=AEBP1 PE=1 SV=1	Q8IUX7	AEBP1	131 kDa		Homo sapiens	0	0	0	2.2494
752	TRUE	Empty	Isoform 2 of GDNF family receptor alpha-1 OS=Homo sapiens OX=9606 GN=GFRA1	P56159-2	GFRA1	51 kDa		unknown	0	0	0	1.4996
753	TRUE	Empty	60S ribosomal protein L11 OS=Homo sapiens OX=9606 GN=RPL11 PE=1 SV=2	P62913 (+1)	RPL11	20 kDa		Homo sapiens	0	1.3892	1.7805	1.4996
754	TRUE	Empty	Isoform 4 of Prostaglandin E synthase 3 OS=Homo sapiens OX=9606 GN=PTGES3	Q15185-4	PTGES3	16 kDa		unknown	0	0	0	1.4996
755	TRUE	Empty	Calnexin OS=Homo sapiens OX=9606 GN=CANX PE=1 SV=2	P27824 (+1)	CANX	68 kDa		Homo sapiens	0	1.3892	1.7805	0
756	TRUE	Empty	Sec1 family domain-containing protein 1 OS=Homo sapiens OX=9606 GN=SCFD1 PE=1 SV=4	Q8WVM8	SCFD1	72 kDa		Homo sapiens	0	0	1.7805	1.4996
757	TRUE	Empty	DDRGK domain-containing protein 1 OS=Homo sapiens OX=9606 GN=DDRGK1 PE=1 SV=2	Q96HY6	DDRGK1	36 kDa		Homo sapiens	0	2.0839	0	0
758	TRUE	Empty	DnaJ homolog subfamily B member 11 OS=Homo sapiens OX=9606 GN=DNAJB11 PE=1 SV=1	Q9UBS4	DNAJB11	41 kDa		Homo sapiens	0	1.3892	1.7805	1.4996
759	TRUE	Empty	Tubulin beta-4A chain OS=Homo sapiens OX=9606 GN=TUBB4A PE=1 SV=2	P04350	TUBB4A	50 kDa	TRUE	Homo sapiens	0	23.617	29.378	24.743
760	TRUE	Empty	S-adenosylmethionine synthase isoform type-2 OS=Homo sapiens OX=9606 GN=MAT2A PE=1 SV=1	P31153	MAT2A	44 kDa		Homo sapiens	0	1.3892	0	0
761	TRUE	Empty	Serpin B7 OS=Homo sapiens OX=9606 GN=SERPINB7 PE=1 SV=1	O75635 (+1)	SERPINB7	43 kDa	TRUE	Homo sapiens	0	0	2.6707	1.4996
762	TRUE	Empty	Isoform Epsilon of Apoptosis regulator BAX OS=Homo sapiens OX=9606 GN=BAX	Q07812-5	BAX	18 kDa		unknown	0	2.0839	2.6707	0
763	TRUE	Empty	Isoform 3 of Acyl-CoA-binding protein OS=Homo sapiens OX=9606 GN=DBI	P07108-3	DBI	10 kDa		unknown	0	1.3892	1.7805	0
764	TRUE	Empty	Heme-binding protein 2 OS=Homo sapiens OX=9606 GN=HEBP2 PE=1 SV=1	Q9Y5Z4	HEBP2	23 kDa		Homo sapiens	0	1.3892	1.7805	0
765	TRUE	Empty	Ran-specific GTPase-activating protein OS=Homo sapiens OX=9606 GN=RANBP1 PE=1 SV=1	P43487 (+1)	RANBP1	23 kDa		Homo sapiens	0	3.4731	0	1.4996
766	TRUE	Empty	60S acidic ribosomal protein P1 OS=Homo sapiens OX=9606 GN=RPLP1 PE=1 SV=1	P05386	RPLP1	12 kDa	TRUE	Homo sapiens	0	2.0839	0	2.2494
767	TRUE	Empty	40S ribosomal protein S21 OS=Homo sapiens OX=9606 GN=RPS21 PE=1 SV=1	P63220	RPS21	9 kDa		Homo sapiens	0	2.7785	1.7805	0
768	TRUE	Empty	Translin-associated protein X OS=Homo sapiens OX=9606 GN=TSNAX PE=1 SV=1	Q99598	TSNAX	33 kDa		Homo sapiens	0	2.0839	0	0
769	TRUE	Empty	Leucine-rich repeat-containing protein 47 OS=Homo sapiens OX=9606 GN=LRRC47 PE=1 SV=1	Q8N1G4	LRRC47	63 kDa		Homo sapiens	0	0	1.7805	0
770	TRUE	Empty	Flavin reductase (NADPH) OS=Homo sapiens OX=9606 GN=BLVRB PE=1 SV=3	P30043	BLVRB	22 kDa		Homo sapiens	0	0	3.5609	2.2494
771	TRUE	Empty	Protein phosphatase 1 regulatory subunit 12A OS=Homo sapiens OX=9606 GN=PPP1R12A PE=1 SV=1	O14974 (+2)	PPP1R12A	115 kDa		Homo sapiens	0	0	0	2.2494
772	TRUE	Empty	Proteasome subunit beta type-5 OS=Homo sapiens OX=9606 GN=PSMB5 PE=1 SV=3	P28074	PSMB5	28 kDa		Homo sapiens	0	0	3.5609	0
773	TRUE	Empty	Quinone oxidoreductase OS=Homo sapiens OX=9606 GN=CRYZ PE=1 SV=1	Q08257 (+1)	CRYZ	35 kDa		Homo sapiens	0	1.3892	0	1.4996
774	TRUE	Empty	Lysosomal alpha-glucosidase OS=Homo sapiens OX=9606 GN=GAA PE=1 SV=4	P10253	GAA	105 kDa		Homo sapiens	0	1.3892	1.7805	0
775	TRUE	Empty	Protein S100-A13 OS=Homo sapiens OX=9606 GN=S100A13 PE=1 SV=1	Q99584	S100A13	11 kDa		Homo sapiens	0	0	1.7805	0
776	TRUE	Empty	Scaffold attachment factor B1 OS=Homo sapiens OX=9606 GN=SAFB PE=1 SV=4	Q15424 (+3)	SAFB	103 kDa		Homo sapiens	0	0	0	1.4996
777	TRUE	Empty	Crk-like protein OS=Homo sapiens OX=9606 GN=CRKL PE=1 SV=1	P46109	CRKL	34 kDa	TRUE	Homo sapiens	0	2.0839	0	0
778	TRUE	Empty	Ubiquitin-fold modifier 1 OS=Homo sapiens OX=9606 GN=UFM1 PE=1 SV=1	P61960	UFM1	9 kDa		Homo sapiens	0	0	1.7805	0
779	TRUE	Empty	40S ribosomal protein S28 OS=Homo sapiens OX=9606 GN=RPS28 PE=1 SV=1	P62857	RPS28	8 kDa		Homo sapiens	0	0	1.7805	1.4996
780	TRUE	Empty	26S proteasome non-ATPase regulatory subunit 6 OS=Homo sapiens OX=9606 GN=PSMD6 PE=1 SV=1	Q15008 (+1)	PSMD6	46 kDa		Homo sapiens	0	2.7785	0	2.2494
781	TRUE	Empty	Tight junction protein ZO-1 OS=Homo sapiens OX=9606 GN=TJP1 PE=1 SV=3	Q07157 (+1)	TJP1	195 kDa		Homo sapiens	0	1.3892	0	2.2494
782	TRUE	Empty	Programmed cell death protein 5 OS=Homo sapiens OX=9606 GN=PDCD5 PE=1 SV=3	O14737	PDCD5	14 kDa		Homo sapiens	0	1.3892	0	0
783	TRUE	Empty	Glucose-6-phosphate 1-dehydrogenase OS=Homo sapiens OX=9606 GN=G6PD PE=1 SV=4	P11413 (+2)	G6PD	59 kDa		Homo sapiens	0	0	0	1.4996
784	TRUE	Empty	Glycerol-3-phosphate phosphatase OS=Homo sapiens OX=9606 GN=PGP PE=1 SV=1	A6NDG6	PGP	34 kDa		Homo sapiens	0	1.3892	0	0
785	TRUE	Empty	Isoform 2 of Integrin alpha-V OS=Homo sapiens OX=9606 GN=ITGAV	P06756-2	ITGAV	112 kDa		unknown	0	0	0	2.2494
786	TRUE	Empty	Immunoglobulin kappa constant OS=Homo sapiens OX=9606 GN=IGKC PE=1 SV=2	P01834	IGKC	12 kDa		Homo sapiens	0	0	0	1.4996
787	TRUE	Empty	26S proteasome non-ATPase regulatory subunit 4 OS=Homo sapiens OX=9606 GN=PSMD4 PE=1 SV=1	P55036	PSMD4	41 kDa		Homo sapiens	0	2.0839	0	1.4996
788	TRUE	Empty	Isoform 2 of Heterogeneous nuclear ribonucleoprotein D-like OS=Homo sapiens OX=9606 GN=HNRNPDL	O14979-2 (+1)	HNRNPDL	34 kDa	TRUE	unknown	0	3.4731	0	2.2494
789	TRUE	Empty	Ferritin heavy chain OS=Homo sapiens OX=9606 GN=FTH1 PE=1 SV=2	P02794	FTH1	21 kDa		Homo sapiens	0	1.3892	0	1.4996
790	TRUE	Empty	Eukaryotic translation initiation factor 3 subunit M OS=Homo sapiens OX=9606 GN=EIF3M PE=1 SV=1	Q7L2H7	EIF3M	43 kDa		Homo sapiens	0	1.3892	0	2.2494
791	TRUE	Empty	Decorin OS=Homo sapiens OX=9606 GN=DCN PE=1 SV=1	P07585	DCN	40 kDa		Homo sapiens	0	1.3892	0	2.9992
792	TRUE	Empty	cAMP-dependent protein kinase type II-alpha regulatory subunit OS=Homo sapiens OX=9606 GN=PRKAR2A PE=1 SV=2	P13861 (+1)	PRKAR2A	46 kDa		Homo sapiens	0	2.7785	2.6707	0
793	TRUE	Empty	Nicotinamide N-methyltransferase OS=Homo sapiens OX=9606 GN=NNMT PE=1 SV=1	P40261	NNMT	30 kDa		Homo sapiens	0	2.0839	0	3.7489
794	TRUE	Empty	Junctional adhesion molecule A OS=Homo sapiens OX=9606 GN=F11R PE=1 SV=1	Q9Y624	F11R	33 kDa		Homo sapiens	0	1.3892	0	1.4996
795	TRUE	Empty	Branched-chain-amino-acid aminotransferase, cytosolic OS=Homo sapiens OX=9606 GN=BCAT1 PE=1 SV=3	P54687 (+2)	BCAT1	43 kDa		Homo sapiens	0	1.3892	4.4511	0
796	TRUE	Empty	Leucine-rich repeat-containing protein 59 OS=Homo sapiens OX=9606 GN=LRRC59 PE=1 SV=1	Q96AG4	LRRC59	35 kDa		Homo sapiens	0	1.3892	0	0
797	TRUE	Empty	Haptoglobin OS=Homo sapiens OX=9606 GN=HP PE=1 SV=1	P00738 (+1)	HP	45 kDa		Homo sapiens	29.026	0	0	0
798	TRUE	Empty	Keratin, type II cytoskeletal 78 OS=Homo sapiens OX=9606 GN=KRT78 PE=1 SV=2	Q8N1N4	KRT78	57 kDa	TRUE	Homo sapiens	58.051	0	0	0
799	TRUE	Empty	Cystatin-A OS=Homo sapiens OX=9606 GN=CSTA PE=1 SV=1	P01040	CSTA	11 kDa		Homo sapiens	48.376	0	0	0
800	TRUE	Empty	Citrate synthase, mitochondrial OS=Homo sapiens OX=9606 GN=CS PE=1 SV=2	O75390	CS	52 kDa		Homo sapiens	0	0	0	1.4996
801	TRUE	Empty	Serpin B12 OS=Homo sapiens OX=9606 GN=SERPINB12 PE=1 SV=1	Q96P63 (+1)	SERPINB12	46 kDa		Homo sapiens	19.35	0	0	0
802	TRUE	Empty	Corneodesmosin OS=Homo sapiens OX=9606 GN=CDSN PE=1 SV=3	Q15517	CDSN	52 kDa		Homo sapiens	29.026	0	0	0
803	TRUE	Empty	ATP synthase subunit beta, mitochondrial OS=Homo sapiens OX=9606 GN=ATP5F1B PE=1 SV=3	P06576	ATP5F1B	57 kDa		Homo sapiens	29.026	0	0	0
804	TRUE	Empty	CAP-Gly domain-containing linker protein 1 OS=Homo sapiens OX=9606 GN=CLIP1 PE=1 SV=2	P30622 (+2)	CLIP1	162 kDa		Homo sapiens	0	0	1.7805	0
805	TRUE	Empty	Desmocollin-1 OS=Homo sapiens OX=9606 GN=DSC1 PE=1 SV=2	Q08554 (+1)	DSC1	100 kDa		Homo sapiens	29.026	0	0	0
806	TRUE	Empty	Keratin, type II cytoskeletal 1b OS=Homo sapiens OX=9606 GN=KRT77 PE=1 SV=3	Q7Z794	KRT77	62 kDa	TRUE	Homo sapiens	183.83	0	0	0
807	TRUE	Empty	1-phosphatidylinositol 4,5-bisphosphate phosphodiesterase delta-1 OS=Homo sapiens OX=9606 GN=PLCD1 PE=1 SV=2	P51178	PLCD1	86 kDa		Homo sapiens	0	0	2.6707	0
808	TRUE	Empty	SH3 and multiple ankyrin repeat domains protein 1 OS=Homo sapiens OX=9606 GN=SHANK1 PE=1 SV=2	Q9Y566	SHANK1	225 kDa		Homo sapiens	0	1.3892	0	0
809	TRUE	Empty	Aminopeptidase N OS=Homo sapiens OX=9606 GN=ANPEP PE=1 SV=4	P15144	ANPEP	110 kDa		Homo sapiens	0	0	0	3.7489
810	TRUE	Empty	Protein-glutamine gamma-glutamyltransferase E OS=Homo sapiens OX=9606 GN=TGM3 PE=1 SV=4	Q08188	TGM3	77 kDa		Homo sapiens	38.701	0	0	0
811	TRUE	Empty	Serine/arginine-rich splicing factor 3 OS=Homo sapiens OX=9606 GN=SRSF3 PE=1 SV=1	P84103 (+1)	SRSF3	19 kDa		Homo sapiens	0	1.3892	1.7805	1.4996
812	TRUE	Empty	Tax1-binding protein 3 OS=Homo sapiens OX=9606 GN=TAX1BP3 PE=1 SV=2	O14907	TAX1BP3	14 kDa		Homo sapiens	0	1.3892	1.7805	2.2494
813	TRUE	Empty	RNA-binding protein 8A OS=Homo sapiens OX=9606 GN=RBM8A PE=1 SV=1	Q9Y5S9 (+1)	RBM8A	20 kDa		Homo sapiens	0	1.3892	1.7805	1.4996
814	TRUE	Empty	Small ubiquitin-related modifier 3 OS=Homo sapiens OX=9606 GN=SUMO3 PE=1 SV=2	P55854 (+1)	SUMO3	12 kDa		Homo sapiens	0	1.3892	1.7805	1.4996
815	TRUE	Empty	Serine/threonine-protein phosphatase 2A activator OS=Homo sapiens OX=9606 GN=PTPA PE=1 SV=3	Q15257 (+2)	PTPA	41 kDa		Homo sapiens	0	1.3892	1.7805	0
816	TRUE	Empty	Creatine kinase B-type OS=Homo sapiens OX=9606 GN=CKB PE=1 SV=1	P12277	CKB	43 kDa		Homo sapiens	0	2.0839	0	2.2494
817	TRUE	Empty	Nuclear ubiquitous casein and cyclin-dependent kinase substrate 1 OS=Homo sapiens OX=9606 GN=NUCKS1 PE=1 SV=1	Q9H1E3	NUCKS1	27 kDa		Homo sapiens	0	1.3892	0	0
818	TRUE	Empty	Sorting nexin-12 OS=Homo sapiens OX=9606 GN=SNX12 PE=1 SV=3	Q9UMY4 (+1)	SNX12	20 kDa	TRUE	Homo sapiens	0	0	1.7805	0
819	TRUE	Empty	Sorting nexin-3 OS=Homo sapiens OX=9606 GN=SNX3 PE=1 SV=3	O60493	SNX3	19 kDa	TRUE	Homo sapiens	0	0	1.7805	0
820	TRUE	Empty	Ras GTPase-activating protein-binding protein 2 OS=Homo sapiens OX=9606 GN=G3BP2 PE=1 SV=2	Q9UN86	G3BP2	54 kDa		Homo sapiens	0	1.3892	0	0
821	TRUE	Empty	Cathepsin Z OS=Homo sapiens OX=9606 GN=CTSZ PE=1 SV=1	Q9UBR2	CTSZ	34 kDa		Homo sapiens	0	2.0839	0	1.4996
822	TRUE	Empty	cAMP-dependent protein kinase type I-alpha regulatory subunit OS=Homo sapiens OX=9606 GN=PRKAR1A PE=1 SV=1	P10644	PRKAR1A	43 kDa		Homo sapiens	0	1.3892	0	1.4996
823	TRUE	Empty	Insulin-like growth factor-binding protein 6 OS=Homo sapiens OX=9606 GN=IGFBP6 PE=1 SV=1	P24592	IGFBP6	25 kDa		Homo sapiens	0	2.0839	0	2.2494
824	TRUE	Empty	Peptidyl-prolyl cis-trans isomerase C OS=Homo sapiens OX=9606 GN=PPIC PE=1 SV=1	P45877	PPIC	23 kDa		Homo sapiens	0	1.3892	1.7805	0
825	TRUE	Empty	Glia maturation factor beta OS=Homo sapiens OX=9606 GN=GMFB PE=1 SV=2	P60983	GMFB	17 kDa		Homo sapiens	0	2.0839	2.6707	0
826	TRUE	Empty	Apoptosis-associated speck-like protein containing a CARD OS=Homo sapiens OX=9606 GN=PYCARD PE=1 SV=2	Q9ULZ3 (+2)	PYCARD	22 kDa		Homo sapiens	0	1.3892	1.7805	0
827	TRUE	Empty	Alpha-fetoprotein OS=Homo sapiens OX=9606 GN=AFP PE=1 SV=1	P02771	AFP	69 kDa		Homo sapiens	0	0	0	1.4996
828	TRUE	Empty	Eukaryotic translation initiation factor 3 subunit F OS=Homo sapiens OX=9606 GN=EIF3F PE=1 SV=1	O00303	EIF3F	38 kDa		Homo sapiens	0	0	0	2.2494
829	TRUE	Empty	Isoform C of Prelamin-A/C OS=Homo sapiens OX=9606 GN=LMNA	P02545-2	LMNA	65 kDa	TRUE	unknown	0	0	24.036	0
830	TRUE	Empty	Basic leucine zipper and W2 domain-containing protein 2 OS=Homo sapiens OX=9606 GN=BZW2 PE=1 SV=1	Q9Y6E2	BZW2	48 kDa		Homo sapiens	0	1.3892	0	0
831	TRUE	Empty	Protein PRRC1 OS=Homo sapiens OX=9606 GN=PRRC1 PE=1 SV=1	Q96M27 (+2)	PRRC1	47 kDa		Homo sapiens	0	0	0	1.4996
832	TRUE	Empty	Epiplakin OS=Homo sapiens OX=9606 GN=EPPK1 PE=1 SV=3	P58107	EPPK1	556 kDa	TRUE	Homo sapiens	0	2.0839	1.7805	0
833	TRUE	Empty	Protein phosphatase 1 regulatory subunit 14B OS=Homo sapiens OX=9606 GN=PPP1R14B PE=1 SV=3	Q96C90	PPP1R14B	16 kDa		Homo sapiens	0	1.3892	0	0
834	TRUE	Empty	GDP-fucose protein O-fucosyltransferase 1 OS=Homo sapiens OX=9606 GN=POFUT1 PE=1 SV=1	Q9H488	POFUT1	44 kDa		Homo sapiens	0	0	2.6707	0
835	TRUE	Empty	Band 4.1-like protein 2 OS=Homo sapiens OX=9606 GN=EPB41L2 PE=1 SV=1	O43491	EPB41L2	113 kDa		Homo sapiens	0	0	0	1.4996
836	TRUE	Empty	Pre-mRNA-splicing factor ATP-dependent RNA helicase DHX15 OS=Homo sapiens OX=9606 GN=DHX15 PE=1 SV=2	O43143	DHX15	91 kDa		Homo sapiens	0	0	0	2.2494
837	TRUE	Empty	60S ribosomal protein L13 OS=Homo sapiens OX=9606 GN=RPL13 PE=1 SV=4	P26373	RPL13	24 kDa		Homo sapiens	0	1.3892	0	0
838	TRUE	Empty	Vesicle-associated membrane protein-associated protein A OS=Homo sapiens OX=9606 GN=VAPA PE=1 SV=3	Q9P0L0 (+1)	VAPA	28 kDa		Homo sapiens	0	1.3892	0	0
839	TRUE	Empty	Guanylate-binding protein 1 OS=Homo sapiens OX=9606 GN=GBP1 PE=1 SV=2	P32455	GBP1	68 kDa		Homo sapiens	0	0	0	1.4996
840	TRUE	Empty	Ubiquitin-like modifier-activating enzyme 6 OS=Homo sapiens OX=9606 GN=UBA6 PE=1 SV=1	A0AVT1 (+1)	UBA6	118 kDa		Homo sapiens	0	1.3892	0	1.4996
841	TRUE	Empty	Isoform 4 of Selenide, water dikinase 1 OS=Homo sapiens OX=9606 GN=SEPHS1	P49903-4	SEPHS1	36 kDa		unknown	0	2.0839	0	1.4996
842	TRUE	Empty	Cell surface glycoprotein MUC18 OS=Homo sapiens OX=9606 GN=MCAM PE=1 SV=2	P43121	MCAM	72 kDa		Homo sapiens	0	0	0	2.9992
843	TRUE	Empty	Complement component 1 Q subcomponent-binding protein, mitochondrial OS=Homo sapiens OX=9606 GN=C1QBP PE=1 SV=1	Q07021	C1QBP	31 kDa		Homo sapiens	0	1.3892	0	2.2494
844	TRUE	Empty	Kunitz-type protease inhibitor 1 OS=Homo sapiens OX=9606 GN=SPINT1 PE=1 SV=2	O43278 (+1)	SPINT1	58 kDa		Homo sapiens	0	1.3892	0	1.4996
845	TRUE	Empty	Small nuclear ribonucleoprotein Sm D2 OS=Homo sapiens OX=9606 GN=SNRPD2 PE=1 SV=1	P62316 (+1)	SNRPD2	14 kDa		Homo sapiens	0	1.3892	0	1.4996
846	TRUE	Empty	Eukaryotic translation initiation factor 2A OS=Homo sapiens OX=9606 GN=EIF2A PE=1 SV=3	Q9BY44 (+1)	EIF2A	65 kDa		Homo sapiens	0	1.3892	0	0
847	TRUE	Empty	Serine/threonine-protein kinase OSR1 OS=Homo sapiens OX=9606 GN=OXSR1 PE=1 SV=1	O95747	OXSR1	58 kDa		Homo sapiens	0	0	1.7805	0
848	TRUE	Empty	Prolyl 3-hydroxylase 1 OS=Homo sapiens OX=9606 GN=P3H1 PE=1 SV=2	Q32P28 (+2)	P3H1	83 kDa		Homo sapiens	0	0	0	1.4996
849	TRUE	Empty	Extended synaptotagmin-1 OS=Homo sapiens OX=9606 GN=ESYT1 PE=1 SV=1	Q9BSJ8 (+1)	ESYT1	123 kDa		Homo sapiens	0	1.3892	0	2.2494
850	TRUE	Empty	TAR DNA-binding protein 43 OS=Homo sapiens OX=9606 GN=TARDBP PE=1 SV=1	Q13148	TARDBP	45 kDa		Homo sapiens	0	2.0839	0	1.4996
851	TRUE	Empty	Proprotein convertase subtilisin/kexin type 5 OS=Homo sapiens OX=9606 GN=PCSK5 PE=1 SV=4	Q92824	PCSK5	207 kDa		Homo sapiens	0	0	0	1.4996
852	TRUE	Empty	Reticulocalbin-3 OS=Homo sapiens OX=9606 GN=RCN3 PE=1 SV=1	Q96D15	RCN3	37 kDa		Homo sapiens	0	2.0839	2.6707	0
853	TRUE	Empty	Importin-9 OS=Homo sapiens OX=9606 GN=IPO9 PE=1 SV=3	Q96P70	IPO9	116 kDa		Homo sapiens	0	2.0839	0	1.4996
854	TRUE	Empty	Isoform 2 of Endothelial differentiation-related factor 1 OS=Homo sapiens OX=9606 GN=EDF1	O60869-2	EDF1	15 kDa		unknown	0	2.0839	0	2.2494
855	TRUE	Empty	40S ribosomal protein S14 OS=Homo sapiens OX=9606 GN=RPS14 PE=1 SV=3	P62263	RPS14	16 kDa		Homo sapiens	0	1.3892	2.6707	0
856	TRUE	Empty	Deoxyuridine 5'-triphosphate nucleotidohydrolase, mitochondrial OS=Homo sapiens OX=9606 GN=DUT PE=1 SV=4	P33316	DUT	27 kDa		Homo sapiens	0	1.3892	0	1.4996
857	TRUE	Empty	Splicing factor 1 OS=Homo sapiens OX=9606 GN=SF1 PE=1 SV=4	Q15637 (+6)	SF1	68 kDa		Homo sapiens	0	2.0839	0	2.9992
858	TRUE	Empty	SUMO-activating enzyme subunit 2 OS=Homo sapiens OX=9606 GN=UBA2 PE=1 SV=2	Q9UBT2	UBA2	71 kDa		Homo sapiens	0	2.7785	0	1.4996
859	TRUE	Empty	Apolipoprotein A-I OS=Homo sapiens OX=9606 GN=APOA1 PE=1 SV=1	P02647	APOA1	31 kDa		Homo sapiens	0	0	0	1.4996
860	TRUE	Empty	Rho GDP-dissociation inhibitor 2 OS=Homo sapiens OX=9606 GN=ARHGDIB PE=1 SV=3	P52566	ARHGDIB	23 kDa		Homo sapiens	0	0	2.6707	0
861	TRUE	Empty	60S ribosomal protein L3 OS=Homo sapiens OX=9606 GN=RPL3 PE=1 SV=2	P39023	RPL3	46 kDa		Homo sapiens	0	0	2.6707	0
862	TRUE	Empty	High mobility group protein HMG-I/HMG-Y OS=Homo sapiens OX=9606 GN=HMGA1 PE=1 SV=3	P17096 (+1)	HMGA1	12 kDa		Homo sapiens	0	2.0839	0	0
863	TRUE	Empty	ATPase ASNA1 OS=Homo sapiens OX=9606 GN=ASNA1 PE=1 SV=2	O43681	ASNA1	39 kDa		Homo sapiens	0	2.0839	0	0
864	TRUE	Empty	Tyrosine-protein phosphatase non-receptor type 11 OS=Homo sapiens OX=9606 GN=PTPN11 PE=1 SV=2	Q06124 (+1)	PTPN11	68 kDa		Homo sapiens	0	0	0	1.4996
865	TRUE	Empty	Cytidine deaminase OS=Homo sapiens OX=9606 GN=CDA PE=1 SV=2	P32320	CDA	16 kDa		Homo sapiens	0	2.0839	0	0
866	TRUE	Empty	Plastin-1 OS=Homo sapiens OX=9606 GN=PLS1 PE=1 SV=2	Q14651	PLS1	70 kDa	TRUE	Homo sapiens	0	0	0	3.7489
867	TRUE	Empty	Alcohol dehydrogenase class-3 OS=Homo sapiens OX=9606 GN=ADH5 PE=1 SV=4	P11766	ADH5	40 kDa		Homo sapiens	0	0	0	2.2494
868	TRUE	Empty	60S ribosomal protein L15 OS=Homo sapiens OX=9606 GN=RPL15 PE=1 SV=2	P61313	RPL15	24 kDa		Homo sapiens	0	0	2.6707	0
869	TRUE	Empty	Aminoacyl tRNA synthase complex-interacting multifunctional protein 1 OS=Homo sapiens OX=9606 GN=AIMP1 PE=1 SV=2	Q12904 (+1)	AIMP1	34 kDa		Homo sapiens	0	1.3892	0	0
870	TRUE	Empty	Paxillin OS=Homo sapiens OX=9606 GN=PXN PE=1 SV=3	P49023 (+2)	PXN	65 kDa		Homo sapiens	0	2.0839	0	0
871	TRUE	Empty	Histone H1.3 OS=Homo sapiens OX=9606 GN=HIST1H1D PE=1 SV=2	P16402	HIST1H1D	22 kDa		Homo sapiens	19.35	0	0	0
872	TRUE	Empty	Alpha-2-macroglobulin-like protein 1 OS=Homo sapiens OX=9606 GN=A2ML1 PE=1 SV=3	A8K2U0 (+1)	A2ML1	161 kDa		Homo sapiens	0	0	1.7805	0
873	TRUE	Empty	Protein farnesyltransferase/geranylgeranyltransferase type-1 subunit alpha OS=Homo sapiens OX=9606 GN=FNTA PE=1 SV=1	P49354	FNTA	44 kDa		Homo sapiens	0	0	1.7805	0
874	TRUE	Empty	Receptor-type tyrosine-protein phosphatase F OS=Homo sapiens OX=9606 GN=PTPRF PE=1 SV=2	P10586 (+1)	PTPRF	213 kDa		Homo sapiens	0	0	0	2.9992
875	TRUE	Empty	Zinc-alpha-2-glycoprotein OS=Homo sapiens OX=9606 GN=AZGP1 PE=1 SV=2	P25311	AZGP1	34 kDa		Homo sapiens	48.376	0	0	0
876	TRUE	Empty	Transmembrane protein 132A OS=Homo sapiens OX=9606 GN=TMEM132A PE=1 SV=1	Q24JP5 (+1)	TMEM132A	110 kDa		Homo sapiens	0	0	0	3.7489
877	TRUE	Empty	Acidic leucine-rich nuclear phosphoprotein 32 family member B OS=Homo sapiens OX=9606 GN=ANP32B PE=1 SV=1	Q92688 (+1)	ANP32B	29 kDa	TRUE	Homo sapiens	0	2.7785	0	0
878	TRUE	Empty	60S ribosomal protein L23 OS=Homo sapiens OX=9606 GN=RPL23 PE=1 SV=1	P62829	RPL23	15 kDa		Homo sapiens	0	1.3892	0	0
879	TRUE	Empty	Histone-binding protein RBBP4 OS=Homo sapiens OX=9606 GN=RBBP4 PE=1 SV=3	Q09028 (+1)	RBBP4	48 kDa		Homo sapiens	0	0	0	1.4996
880	TRUE	Empty	Protein canopy homolog 2 OS=Homo sapiens OX=9606 GN=CNPY2 PE=1 SV=1	Q9Y2B0	CNPY2	21 kDa		Homo sapiens	0	0	1.7805	1.4996
881	TRUE	Empty	60S ribosomal protein L9 OS=Homo sapiens OX=9606 GN=RPL9 PE=1 SV=1	P32969 (+1)	RPL9	22 kDa		Homo sapiens	0	1.3892	1.7805	0
882	TRUE	Empty	Connective tissue growth factor OS=Homo sapiens OX=9606 GN=CTGF PE=1 SV=2	P29279	CTGF	38 kDa		Homo sapiens	0	1.3892	0	1.4996
883	TRUE	Empty	Calcium-regulated heat-stable protein 1 OS=Homo sapiens OX=9606 GN=CARHSP1 PE=1 SV=2	Q9Y2V2	CARHSP1	16 kDa		Homo sapiens	0	2.0839	0	1.4996
884	TRUE	Empty	Prefoldin subunit 3 OS=Homo sapiens OX=9606 GN=VBP1 PE=1 SV=3	P61758	VBP1	23 kDa		Homo sapiens	0	1.3892	0	1.4996
885	TRUE	Empty	Peptidyl-prolyl cis-trans isomerase FKBP2 OS=Homo sapiens OX=9606 GN=FKBP2 PE=1 SV=2	P26885	FKBP2	16 kDa		Homo sapiens	0	1.3892	1.7805	0
886	TRUE	Empty	GTP-binding protein SAR1a OS=Homo sapiens OX=9606 GN=SAR1A PE=1 SV=1	Q9NR31 (+1)	SAR1A	22 kDa		Homo sapiens	0	2.0839	0	0
887	TRUE	Empty	Cofilin-2 OS=Homo sapiens OX=9606 GN=CFL2 PE=1 SV=1	Q9Y281 (+1)	CFL2	19 kDa	TRUE	Homo sapiens	0	6.2516	0	0
888	TRUE	Empty	Calcineurin subunit B type 1 OS=Homo sapiens OX=9606 GN=PPP3R1 PE=1 SV=2	P63098	PPP3R1	19 kDa		Homo sapiens	0	0	1.7805	1.4996
889	TRUE	Empty	Vitronectin OS=Homo sapiens OX=9606 GN=VTN PE=1 SV=1	P04004	VTN	54 kDa		Homo sapiens	0	0	0	2.2494
890	TRUE	Empty	Glycogen synthase kinase-3 beta OS=Homo sapiens OX=9606 GN=GSK3B PE=1 SV=2	P49841 (+1)	GSK3B	47 kDa		Homo sapiens	0	0	1.7805	0
891	TRUE	Empty	Eukaryotic translation initiation factor 3 subunit D OS=Homo sapiens OX=9606 GN=EIF3D PE=1 SV=1	O15371 (+2)	EIF3D	64 kDa		Homo sapiens	0	0	0	1.4996
892	TRUE	Empty	Transcription elongation factor A protein 1 OS=Homo sapiens OX=9606 GN=TCEA1 PE=1 SV=2	P23193	TCEA1	34 kDa		Homo sapiens	0	0	0	1.4996
893	TRUE	Empty	Low molecular weight phosphotyrosine protein phosphatase OS=Homo sapiens OX=9606 GN=ACP1 PE=1 SV=3	P24666	ACP1	18 kDa		Homo sapiens	0	1.3892	0	0
894	TRUE	Empty	Fibulin-1 OS=Homo sapiens OX=9606 GN=FBLN1 PE=1 SV=4	P23142	FBLN1	77 kDa		Homo sapiens	0	0	0	1.4996
895	TRUE	Empty	Glucosylceramidase OS=Homo sapiens OX=9606 GN=GBA PE=1 SV=3	P04062 (+2)	GBA	60 kDa		Homo sapiens	0	0	0	2.2494
896	TRUE	Empty	Cysteine and glycine-rich protein 2 OS=Homo sapiens OX=9606 GN=CSRP2 PE=1 SV=3	Q16527	CSRP2	21 kDa		Homo sapiens	0	1.3892	0	1.4996
897	TRUE	Empty	Elongin-C OS=Homo sapiens OX=9606 GN=ELOC PE=1 SV=1	Q15369	ELOC	12 kDa		Homo sapiens	0	1.3892	0	0
898	TRUE	Empty	Specifically androgen-regulated gene protein OS=Homo sapiens OX=9606 GN=SARG PE=1 SV=2	Q9BW04	SARG	64 kDa		Homo sapiens	0	1.3892	0	0
899	TRUE	Empty	Coiled-coil domain-containing protein 124 OS=Homo sapiens OX=9606 GN=CCDC124 PE=1 SV=1	Q96CT7	CCDC124	26 kDa		Homo sapiens	0	1.3892	0	0
900	TRUE	Empty	Endoplasmic reticulum resident protein 44 OS=Homo sapiens OX=9606 GN=ERP44 PE=1 SV=1	Q9BS26	ERP44	47 kDa		Homo sapiens	0	0	1.7805	0
901	TRUE	Empty	Serine/arginine-rich splicing factor 6 OS=Homo sapiens OX=9606 GN=SRSF6 PE=1 SV=2	Q13247 (+1)	SRSF6	40 kDa		Homo sapiens	0	2.0839	0	2.2494
902	TRUE	Empty	Aspartate aminotransferase, mitochondrial OS=Homo sapiens OX=9606 GN=GOT2 PE=1 SV=3	P00505 (+1)	GOT2	48 kDa		Homo sapiens	0	2.0839	0	1.4996
903	TRUE	Empty	Isoform 2 of Basigin OS=Homo sapiens OX=9606 GN=BSG	P35613-2	BSG	29 kDa		unknown	0	1.3892	0	2.2494
904	TRUE	Empty	V-type proton ATPase subunit B, brain isoform OS=Homo sapiens OX=9606 GN=ATP6V1B2 PE=1 SV=3	P21281	ATP6V1B2	57 kDa		Homo sapiens	0	2.0839	0	1.4996
905	TRUE	Empty	Tyrosine--tRNA ligase, cytoplasmic OS=Homo sapiens OX=9606 GN=YARS PE=1 SV=4	P54577	YARS	59 kDa		Homo sapiens	0	0	1.7805	1.4996
906	TRUE	Empty	ELAV-like protein 1 OS=Homo sapiens OX=9606 GN=ELAVL1 PE=1 SV=2	Q15717	ELAVL1	36 kDa		Homo sapiens	0	1.3892	0	0
907	TRUE	Empty	Cytoplasmic dynein 1 light intermediate chain 1 OS=Homo sapiens OX=9606 GN=DYNC1LI1 PE=1 SV=3	Q9Y6G9	DYNC1LI1	57 kDa		Homo sapiens	0	0	1.7805	0
908	TRUE	Empty	Cadherin-3 OS=Homo sapiens OX=9606 GN=CDH3 PE=1 SV=2	P22223 (+1)	CDH3	91 kDa		Homo sapiens	0	1.3892	0	0
909	TRUE	Empty	Nucleoprotein TPR OS=Homo sapiens OX=9606 GN=TPR PE=1 SV=3	P12270	TPR	267 kDa		Homo sapiens	0	0	0	2.2494
910	TRUE	Empty	Isoform 2 of EGF-containing fibulin-like extracellular matrix protein 1 OS=Homo sapiens OX=9606 GN=EFEMP1	Q12805-2	EFEMP1	54 kDa		unknown	0	0	0	2.2494
911	TRUE	Empty	Inverted formin-2 OS=Homo sapiens OX=9606 GN=INF2 PE=1 SV=2	Q27J81 (+1)	INF2	136 kDa		Homo sapiens	0	0	0	1.4996
912	TRUE	Empty	Leukemia inhibitory factor OS=Homo sapiens OX=9606 GN=LIF PE=1 SV=1	P15018	LIF	22 kDa		Homo sapiens	0	0	0	2.9992
913	TRUE	Empty	Methionine aminopeptidase 2 OS=Homo sapiens OX=9606 GN=METAP2 PE=1 SV=1	P50579 (+1)	METAP2	53 kDa		Homo sapiens	0	1.3892	0	0
914	TRUE	Empty	N(4)-(beta-N-acetylglucosaminyl)-L-asparaginase OS=Homo sapiens OX=9606 GN=AGA PE=1 SV=2	P20933	AGA	37 kDa		Homo sapiens	0	1.3892	0	0
915	TRUE	Empty	Huntingtin-interacting protein 1-related protein OS=Homo sapiens OX=9606 GN=HIP1R PE=1 SV=2	O75146	HIP1R	119 kDa		Homo sapiens	0	1.3892	0	0
916	TRUE	Empty	Endoplasmic reticulum aminopeptidase 2 OS=Homo sapiens OX=9606 GN=ERAP2 PE=1 SV=2	Q6P179 (+1)	ERAP2	110 kDa		Homo sapiens	0	0	0	1.4996
917	TRUE	Empty	Isoform 3 of Neural cell adhesion molecule L1 OS=Homo sapiens OX=9606 GN=L1CAM	P32004-3	L1CAM	139 kDa		unknown	0	0	0	2.9992
918	TRUE	Empty	Keratin, type II cytoskeletal 80 OS=Homo sapiens OX=9606 GN=KRT80 PE=1 SV=2	Q6KB66 (+1)	KRT80	51 kDa	TRUE	Homo sapiens	58.051	0	0	0
919	TRUE	Empty	Uncharacterized protein C4orf54 OS=Homo sapiens OX=9606 GN=C4orf54 PE=2 SV=1	D6RIA3	C4orf54	190 kDa		Homo sapiens	0	0	1.7805	0
920	TRUE	Empty	60S ribosomal protein L14 OS=Homo sapiens OX=9606 GN=RPL14 PE=1 SV=4	P50914	RPL14	23 kDa		Homo sapiens	0	1.3892	1.7805	0
921	TRUE	Empty	Small acidic protein OS=Homo sapiens OX=9606 GN=SMAP PE=1 SV=1	O00193	SMAP	20 kDa		Homo sapiens	0	1.3892	0	1.4996
922	TRUE	Empty	SAP domain-containing ribonucleoprotein OS=Homo sapiens OX=9606 GN=SARNP PE=1 SV=3	P82979	SARNP	24 kDa		Homo sapiens	0	1.3892	0	1.4996
923	TRUE	Empty	Endothelial protein C receptor OS=Homo sapiens OX=9606 GN=PROCR PE=1 SV=1	Q9UNN8	PROCR	27 kDa		Homo sapiens	0	1.3892	0	1.4996
924	TRUE	Empty	Cytoplasmic dynein 1 light intermediate chain 2 OS=Homo sapiens OX=9606 GN=DYNC1LI2 PE=1 SV=1	O43237 (+1)	DYNC1LI2	54 kDa		Homo sapiens	0	1.3892	0	1.4996
925	TRUE	Empty	Platelet-activating factor acetylhydrolase IB subunit gamma OS=Homo sapiens OX=9606 GN=PAFAH1B3 PE=1 SV=1	Q15102	PAFAH1B3	26 kDa		Homo sapiens	0	0	0	1.4996
926	TRUE	Empty	26S proteasome non-ATPase regulatory subunit 3 OS=Homo sapiens OX=9606 GN=PSMD3 PE=1 SV=2	O43242	PSMD3	61 kDa		Homo sapiens	0	1.3892	0	0
927	TRUE	Empty	ADP-ribosylation factor-like protein 1 OS=Homo sapiens OX=9606 GN=ARL1 PE=1 SV=1	P40616 (+1)	ARL1	20 kDa		Homo sapiens	0	0	2.6707	0
928	TRUE	Empty	Elongin-B OS=Homo sapiens OX=9606 GN=ELOB PE=1 SV=1	Q15370 (+1)	ELOB	13 kDa		Homo sapiens	0	0	1.7805	0
929	TRUE	Empty	Golgi phosphoprotein 3 OS=Homo sapiens OX=9606 GN=GOLPH3 PE=1 SV=1	Q9H4A6	GOLPH3	34 kDa		Homo sapiens	0	1.3892	0	0
930	TRUE	Empty	Keratin, type II cytoskeletal 6C OS=Homo sapiens OX=9606 GN=KRT6C PE=1 SV=3	P48668	KRT6C	60 kDa	TRUE	Homo sapiens	203.18	0	0	0
931	TRUE	Empty	Lysosome-associated membrane glycoprotein 2 OS=Homo sapiens OX=9606 GN=LAMP2 PE=1 SV=2	P13473 (+2)	LAMP2	45 kDa		Homo sapiens	0	0	0	1.4996
932	TRUE	Empty	Interferon-induced, double-stranded RNA-activated protein kinase OS=Homo sapiens OX=9606 GN=EIF2AK2 PE=1 SV=2	P19525 (+1)	EIF2AK2	62 kDa		Homo sapiens	0	1.3892	0	0
933	TRUE	Empty	Secreted frizzled-related protein 1 OS=Homo sapiens OX=9606 GN=SFRP1 PE=1 SV=1	Q8N474	SFRP1	35 kDa		Homo sapiens	0	0	0	1.4996
934	TRUE	Empty	Dipeptidyl peptidase 1 OS=Homo sapiens OX=9606 GN=CTSC PE=1 SV=2	P53634	CTSC	52 kDa		Homo sapiens	0	0	0	1.4996
935	TRUE	Empty	Actin-like protein 6A OS=Homo sapiens OX=9606 GN=ACTL6A PE=1 SV=1	O96019	ACTL6A	47 kDa		Homo sapiens	0	1.3892	0	0
936	TRUE	Empty	Acidic leucine-rich nuclear phosphoprotein 32 family member E OS=Homo sapiens OX=9606 GN=ANP32E PE=1 SV=1	Q9BTT0 (+1)	ANP32E	31 kDa		Homo sapiens	0	0	0	1.4996
937	TRUE	Empty	Inter-alpha-trypsin inhibitor heavy chain H2 OS=Homo sapiens OX=9606 GN=ITIH2 PE=1 SV=2	P19823	ITIH2	106 kDa		Homo sapiens	19.35	0	0	1.4996
938	TRUE	Empty	Sorting nexin-2 OS=Homo sapiens OX=9606 GN=SNX2 PE=1 SV=2	O60749	SNX2	58 kDa	TRUE	Homo sapiens	0	1.3892	2.6707	0
939	TRUE	Empty	Tumor protein D52 OS=Homo sapiens OX=9606 GN=TPD52 PE=1 SV=2	P55327 (+3)	TPD52	24 kDa		Homo sapiens	0	1.3892	0	1.4996
940	TRUE	Empty	Myosin regulatory light polypeptide 9 OS=Homo sapiens OX=9606 GN=MYL9 PE=1 SV=4	P24844	MYL9	20 kDa	TRUE	Homo sapiens	0	6.2516	0	5.9983
941	TRUE	Empty	Isoform 2 of Neogenin OS=Homo sapiens OX=9606 GN=NEO1	Q92859-2	NEO1	154 kDa		unknown	0	1.3892	0	1.4996
942	TRUE	Empty	Tumor necrosis factor receptor superfamily member 11B OS=Homo sapiens OX=9606 GN=TNFRSF11B PE=1 SV=3	O00300	TNFRSF11B	46 kDa		Homo sapiens	0	1.3892	0	1.4996
943	TRUE	Empty	Protein PML OS=Homo sapiens OX=9606 GN=PML PE=1 SV=3	P29590 (+6)	PML	98 kDa		Homo sapiens	0	0	0	1.4996
944	TRUE	Empty	182 kDa tankyrase-1-binding protein OS=Homo sapiens OX=9606 GN=TNKS1BP1 PE=1 SV=4	Q9C0C2	TNKS1BP1	182 kDa		Homo sapiens	0	1.3892	0	0
945	TRUE	Empty	Transcriptional activator protein Pur-alpha OS=Homo sapiens OX=9606 GN=PURA PE=1 SV=2	Q00577	PURA	35 kDa		Homo sapiens	0	0	1.7805	0
946	TRUE	Empty	Tyrosine-protein kinase receptor UFO OS=Homo sapiens OX=9606 GN=AXL PE=1 SV=4	P30530 (+1)	AXL	98 kDa		Homo sapiens	0	0	0	1.4996
947	TRUE	Empty	Serine/threonine-protein phosphatase 2A 55 kDa regulatory subunit B alpha isoform OS=Homo sapiens OX=9606 GN=PPP2R2A PE=1 SV=1	P63151	PPP2R2A	52 kDa		Homo sapiens	0	0	1.7805	0
948	TRUE	Empty	Syntaxin-7 OS=Homo sapiens OX=9606 GN=STX7 PE=1 SV=4	O15400 (+1)	STX7	30 kDa		Homo sapiens	0	0	0	1.4996
949	TRUE	Empty	Transcription factor BTF3 homolog 4 OS=Homo sapiens OX=9606 GN=BTF3L4 PE=1 SV=1	Q96K17 (+1)	BTF3L4	17 kDa		Homo sapiens	0	1.3892	0	0
950	TRUE	Empty	Splicing factor 3B subunit 1 OS=Homo sapiens OX=9606 GN=SF3B1 PE=1 SV=3	O75533	SF3B1	146 kDa		Homo sapiens	0	0	0	1.4996
951	TRUE	Empty	Serine/threonine-protein phosphatase 2A catalytic subunit alpha isoform OS=Homo sapiens OX=9606 GN=PPP2CA PE=1 SV=1	P67775	PPP2CA	36 kDa		Homo sapiens	0	0	1.7805	0
952	TRUE	Empty	28 kDa heat- and acid-stable phosphoprotein OS=Homo sapiens OX=9606 GN=PDAP1 PE=1 SV=1	Q13442	PDAP1	21 kDa		Homo sapiens	0	1.3892	0	0
953	TRUE	Empty	Vasorin OS=Homo sapiens OX=9606 GN=VASN PE=1 SV=1	Q6EMK4	VASN	72 kDa		Homo sapiens	0	1.3892	0	0
954	TRUE	Empty	Calmodulin-like protein 5 OS=Homo sapiens OX=9606 GN=CALML5 PE=1 SV=2	Q9NZT1	CALML5	16 kDa		Homo sapiens	29.026	0	0	0
955	TRUE	Empty	Fructose-2,6-bisphosphatase TIGAR OS=Homo sapiens OX=9606 GN=TIGAR PE=1 SV=1	Q9NQ88	TIGAR	30 kDa		Homo sapiens	0	0	2.6707	0
956	TRUE	Empty	Calcium-binding protein 39 OS=Homo sapiens OX=9606 GN=CAB39 PE=1 SV=1	Q9Y376	CAB39	40 kDa		Homo sapiens	0	0	1.7805	0
957	TRUE	Empty	N-acetylgalactosaminyltransferase 7 OS=Homo sapiens OX=9606 GN=GALNT7 PE=1 SV=1	Q86SF2	GALNT7	75 kDa		Homo sapiens	0	0	0	1.4996
958	TRUE	Empty	Isoform 3 of PDZ and LIM domain protein 2 OS=Homo sapiens OX=9606 GN=PDLIM2	Q96JY6-3	PDLIM2	39 kDa		unknown	0	1.3892	0	0
959	TRUE	Empty	Lamina-associated polypeptide 2, isoforms beta/gamma OS=Homo sapiens OX=9606 GN=TMPO PE=1 SV=2	P42167 (+2)	TMPO	51 kDa		Homo sapiens	0	0	0	2.2494
960	TRUE	Empty	Eukaryotic translation initiation factor 1 OS=Homo sapiens OX=9606 GN=EIF1 PE=1 SV=1	P41567	EIF1	13 kDa		Homo sapiens	0	2.7785	0	0
961	TRUE	Empty	Serine protease HTRA1 OS=Homo sapiens OX=9606 GN=HTRA1 PE=1 SV=1	Q92743	HTRA1	51 kDa		Homo sapiens	0	0	0	1.4996
962	TRUE	Empty	KDEL motif-containing protein 2 OS=Homo sapiens OX=9606 GN=KDELC2 PE=1 SV=2	Q7Z4H8 (+2)	KDELC2	59 kDa		Homo sapiens	0	0	1.7805	0
963	TRUE	Empty	Transforming growth factor beta-1-induced transcript 1 protein OS=Homo sapiens OX=9606 GN=TGFB1I1 PE=1 SV=2	O43294	TGFB1I1	50 kDa		Homo sapiens	0	1.3892	0	0
964	TRUE	Empty	26S proteasome non-ATPase regulatory subunit 5 OS=Homo sapiens OX=9606 GN=PSMD5 PE=1 SV=3	Q16401 (+1)	PSMD5	56 kDa		Homo sapiens	0	0	2.6707	0
965	TRUE	Empty	Beta-hexosaminidase subunit alpha OS=Homo sapiens OX=9606 GN=HEXA PE=1 SV=2	P06865	HEXA	61 kDa		Homo sapiens	0	0	0	1.4996
966	TRUE	Empty	Complement C4-A OS=Homo sapiens OX=9606 GN=C4A PE=1 SV=2	P0C0L4 (+1)	C4A	193 kDa		Homo sapiens	0	0	1.7805	0
967	TRUE	Empty	Serine/threonine-protein kinase Nek7 OS=Homo sapiens OX=9606 GN=NEK7 PE=1 SV=1	Q8TDX7	NEK7	35 kDa		Homo sapiens	0	0	1.7805	0
968	TRUE	Empty	ADP/ATP translocase 2 OS=Homo sapiens OX=9606 GN=SLC25A5 PE=1 SV=7	P05141	SLC25A5	33 kDa		Homo sapiens	19.35	0	0	0
969	TRUE	Empty	Annexin A3 OS=Homo sapiens OX=9606 GN=ANXA3 PE=1 SV=3	P12429	ANXA3	36 kDa		Homo sapiens	0	0	1.7805	0
970	TRUE	Empty	Exostosin-1 OS=Homo sapiens OX=9606 GN=EXT1 PE=1 SV=2	Q16394	EXT1	86 kDa		Homo sapiens	0	0	0	1.4996
971	TRUE	Empty	Actin-related protein 2/3 complex subunit 1A OS=Homo sapiens OX=9606 GN=ARPC1A PE=2 SV=2	Q92747	ARPC1A	42 kDa		Homo sapiens	0	0	1.7805	0
972	TRUE	Empty	Collagen alpha-1(I) chain OS=Homo sapiens OX=9606 GN=COL1A1 PE=1 SV=5	P02452-DECOY		?		unknown	0	1.3892	0	0
973	TRUE	Empty	Adenylosuccinate lyase OS=Homo sapiens OX=9606 GN=ADSL PE=1 SV=2	P30566 (+1)	ADSL	55 kDa		Homo sapiens	0	1.3892	0	0
974	TRUE	Empty	Vacuolar protein sorting-associated protein 28 homolog OS=Homo sapiens OX=9606 GN=VPS28 PE=1 SV=1	Q9UK41	VPS28	25 kDa		Homo sapiens	0	3.4731	0	0
975	TRUE	Empty	Coatomer subunit zeta-1 OS=Homo sapiens OX=9606 GN=COPZ1 PE=1 SV=1	P61923 (+1)	COPZ1	20 kDa		Homo sapiens	0	1.3892	0	0
976	TRUE	Empty	BolA-like protein 2 OS=Homo sapiens OX=9606 GN=BOLA2 PE=1 SV=1	Q9H3K6 (+1)	BOLA2	10 kDa		Homo sapiens	0	0	0	1.4996
977	TRUE	Empty	Deoxyribose-phosphate aldolase OS=Homo sapiens OX=9606 GN=DERA PE=1 SV=2	Q9Y315	DERA	35 kDa		Homo sapiens	0	0	0	1.4996
978	TRUE	Empty	Activator of 90 kDa heat shock protein ATPase homolog 1 OS=Homo sapiens OX=9606 GN=AHSA1 PE=1 SV=1	O95433 (+1)	AHSA1	38 kDa		Homo sapiens	0	0	1.7805	0
979	TRUE	Empty	Glycylpeptide N-tetradecanoyltransferase 1 OS=Homo sapiens OX=9606 GN=NMT1 PE=1 SV=2	P30419 (+1)	NMT1	57 kDa		Homo sapiens	0	0	0	1.4996
980	TRUE	Empty	GDP-L-fucose synthase OS=Homo sapiens OX=9606 GN=TSTA3 PE=1 SV=1	Q13630	TSTA3	36 kDa		Homo sapiens	0	1.3892	0	0
981	TRUE	Empty	FAS-associated death domain protein OS=Homo sapiens OX=9606 GN=FADD PE=1 SV=1	Q13158	FADD	23 kDa		Homo sapiens	0	1.3892	0	1.4996
982	TRUE	Empty	Myc box-dependent-interacting protein 1 OS=Homo sapiens OX=9606 GN=BIN1 PE=1 SV=1	O00499 (+10)	BIN1	65 kDa		Homo sapiens	0	1.3892	0	1.4996
983	TRUE	Empty	LIM and cysteine-rich domains protein 1 OS=Homo sapiens OX=9606 GN=LMCD1 PE=1 SV=1	Q9NZU5 (+1)	LMCD1	41 kDa		Homo sapiens	0	1.3892	0	1.4996
984	TRUE	Empty	N-acetylglucosamine-1-phosphotransferase subunit gamma OS=Homo sapiens OX=9606 GN=GNPTG PE=1 SV=1	Q9UJJ9	GNPTG	34 kDa		Homo sapiens	0	1.3892	0	0
985	TRUE	Empty	60S ribosomal protein L36 OS=Homo sapiens OX=9606 GN=RPL36 PE=1 SV=3	Q9Y3U8	RPL36	12 kDa		Homo sapiens	0	1.3892	0	0
986	TRUE	Empty	DnaJ homolog subfamily C member 8 OS=Homo sapiens OX=9606 GN=DNAJC8 PE=1 SV=2	O75937	DNAJC8	30 kDa		Homo sapiens	0	1.3892	0	0
987	TRUE	Empty	Isoform 2 of Exostosin-2 OS=Homo sapiens OX=9606 GN=EXT2	Q93063-2	EXT2	84 kDa		unknown	0	0	0	1.4996
988	TRUE	Empty	Protein TFG OS=Homo sapiens OX=9606 GN=TFG PE=1 SV=2	Q92734 (+3)	TFG	43 kDa		Homo sapiens	0	1.3892	0	0
989	TRUE	Empty	Thrombospondin-3 OS=Homo sapiens OX=9606 GN=THBS3 PE=1 SV=1	P49746	THBS3	104 kDa	TRUE	Homo sapiens	0	2.0839	0	0
990	TRUE	Empty	C-X-C motif chemokine 5 OS=Homo sapiens OX=9606 GN=CXCL5 PE=1 SV=1	P42830	CXCL5	12 kDa		Homo sapiens	0	0	0	2.2494
991	TRUE	Empty	40S ribosomal protein S27-like OS=Homo sapiens OX=9606 GN=RPS27L PE=1 SV=3	Q71UM5	RPS27L	9 kDa		Homo sapiens	0	0	1.7805	0
992	TRUE	Empty	Legumain OS=Homo sapiens OX=9606 GN=LGMN PE=1 SV=1	Q99538	LGMN	49 kDa		Homo sapiens	0	0	0	2.2494
993	TRUE	Empty	Inositol-3-phosphate synthase 1 OS=Homo sapiens OX=9606 GN=ISYNA1 PE=1 SV=1	Q9NPH2 (+1)	ISYNA1	61 kDa		Homo sapiens	0	0	0	2.2494
994	TRUE	Empty	Platelet-derived growth factor C OS=Homo sapiens OX=9606 GN=PDGFC PE=1 SV=2	Q9NRA1	PDGFC	39 kDa		Homo sapiens	0	0	0	1.4996
995	TRUE	Empty	Glypican-1 OS=Homo sapiens OX=9606 GN=GPC1 PE=1 SV=2	P35052	GPC1	62 kDa		Homo sapiens	0	0	0	1.4996
996	TRUE	Empty	Isoform 3 of Guanine nucleotide exchange factor VAV2 OS=Homo sapiens OX=9606 GN=VAV2	P52735-3	VAV2	97 kDa		unknown	0	0	1.7805	0
997	TRUE	Empty	40S ribosomal protein S24 OS=Homo sapiens OX=9606 GN=RPS24 PE=1 SV=1	P62847 (+3)	RPS24	15 kDa		Homo sapiens	0	0	2.6707	0
998	TRUE	Empty	Neuropilin-2 OS=Homo sapiens OX=9606 GN=NRP2 PE=1 SV=3	O60462 (+4)	NRP2	105 kDa		Homo sapiens	0	0	0	1.4996
999	TRUE	Empty	V-type proton ATPase subunit S1 OS=Homo sapiens OX=9606 GN=ATP6AP1 PE=1 SV=2	Q15904	ATP6AP1	52 kDa		Homo sapiens	0	0	0	1.4996
1000	TRUE	Empty	Integrator complex subunit 3 OS=Homo sapiens OX=9606 GN=INTS3 PE=1 SV=1	Q68E01 (+1)	INTS3	118 kDa		Homo sapiens	0	0	0	1.4996
1001	TRUE	Empty	Fibrillin-2 OS=Homo sapiens OX=9606 GN=FBN2 PE=1 SV=3	P35556	FBN2	315 kDa	TRUE	Homo sapiens	0	1.3892	0	0
1002	TRUE	Empty	Isoform 2a of Transcription initiation factor TFIID subunit 1 OS=Homo sapiens OX=9606 GN=TAF1	P21675-5 (+1)	TAF1	209 kDa		unknown	0	0	0	1.4996
1003	TRUE	Empty	Guanine nucleotide-binding protein G(t) subunit alpha-3 OS=Homo sapiens OX=9606 GN=GNAT3 PE=2 SV=2	A8MTJ3	GNAT3	40 kDa		Homo sapiens	0	0	0	1.4996
1004	TRUE	Empty	WASH complex subunit 2A OS=Homo sapiens OX=9606 GN=WASHC2A PE=1 SV=3	Q641Q2 (+7)	WASHC2A	147 kDa		Homo sapiens	0	1.3892	0	0
1005	TRUE	Empty	NAD(P)H-hydrate epimerase OS=Homo sapiens OX=9606 GN=NAXE PE=1 SV=2	Q8NCW5 (+1)	NAXE	32 kDa		Homo sapiens	0	0	1.7805	0
1006	TRUE	Empty	Proteasome activator complex subunit 3 OS=Homo sapiens OX=9606 GN=PSME3 PE=1 SV=1	P61289 (+2)	PSME3	30 kDa		Homo sapiens	0	0	0	1.4996
1007	TRUE	Empty	Acetyl-CoA acetyltransferase, mitochondrial OS=Homo sapiens OX=9606 GN=ACAT1 PE=1 SV=1	P24752	ACAT1	45 kDa		Homo sapiens	0	1.3892	0	0
1008	TRUE	Empty	Biotinidase OS=Homo sapiens OX=9606 GN=BTD PE=1 SV=2	P43251 (+3)	BTD	61 kDa		Homo sapiens	0	0	0	2.2494
1009	TRUE	Empty	Probable ATP-dependent RNA helicase DDX5 OS=Homo sapiens OX=9606 GN=DDX5 PE=1 SV=1	P17844	DDX5	69 kDa	TRUE	Homo sapiens	0	2.7785	0	0
1010	TRUE	Empty	Splicing factor 3A subunit 3 OS=Homo sapiens OX=9606 GN=SF3A3 PE=1 SV=1	Q12874	SF3A3	59 kDa		Homo sapiens	0	0	0	2.9992
1011	TRUE	Empty	Translin OS=Homo sapiens OX=9606 GN=TSN PE=1 SV=1	Q15631	TSN	26 kDa		Homo sapiens	0	0	3.5609	0
1012	TRUE	Empty	Serum amyloid A-1 protein OS=Homo sapiens OX=9606 GN=SAA1 PE=1 SV=1	P0DJI8	SAA1	14 kDa		Homo sapiens	0	0	0	1.4996
1013	TRUE	Empty	Integrin-linked protein kinase OS=Homo sapiens OX=9606 GN=ILK PE=1 SV=2	Q13418 (+2)	ILK	51 kDa		Homo sapiens	0	1.3892	0	0
1014	TRUE	Empty	Dihydrolipoyl dehydrogenase, mitochondrial OS=Homo sapiens OX=9606 GN=DLD PE=1 SV=2	P09622 (+2)	DLD	54 kDa		Homo sapiens	0	1.3892	0	0
1015	TRUE	Empty	NPC intracellular cholesterol transporter 2 OS=Homo sapiens OX=9606 GN=NPC2 PE=1 SV=1	P61916 (+1)	NPC2	17 kDa		Homo sapiens	0	1.3892	0	0
1016	TRUE	Empty	Na(+)/H(+) exchange regulatory cofactor NHE-RF1 OS=Homo sapiens OX=9606 GN=SLC9A3R1 PE=1 SV=4	O14745	SLC9A3R1	39 kDa		Homo sapiens	0	0	1.7805	0
1017	TRUE	Empty	Insulin-like growth factor-binding protein 1 OS=Homo sapiens OX=9606 GN=IGFBP1 PE=1 SV=1	P08833	IGFBP1	28 kDa		Homo sapiens	0	0	0	1.4996
1018	TRUE	Empty	Biliverdin reductase A OS=Homo sapiens OX=9606 GN=BLVRA PE=1 SV=2	P53004	BLVRA	33 kDa		Homo sapiens	0	0	0	1.4996
1019	TRUE	Empty	Protein jagged-1 OS=Homo sapiens OX=9606 GN=JAG1 PE=1 SV=3	P78504	JAG1	134 kDa		Homo sapiens	0	0	0	1.4996
1020	TRUE	Empty	Polyadenylate-binding protein 2 OS=Homo sapiens OX=9606 GN=PABPN1 PE=1 SV=3	Q86U42 (+1)	PABPN1	33 kDa		Homo sapiens	0	0	0	1.4996
1021	TRUE	Empty	Lysosomal Pro-X carboxypeptidase OS=Homo sapiens OX=9606 GN=PRCP PE=1 SV=1	P42785 (+1)	PRCP	56 kDa		Homo sapiens	0	0	0	1.4996
1022	TRUE	Empty	Alpha-galactosidase A OS=Homo sapiens OX=9606 GN=GLA PE=1 SV=1	P06280	GLA	49 kDa		Homo sapiens	0	0	0	1.4996
1023	TRUE	Empty	Farnesyl pyrophosphate synthase OS=Homo sapiens OX=9606 GN=FDPS PE=1 SV=4	P14324 (+1)	FDPS	48 kDa		Homo sapiens	0	0	0	1.4996
1024	TRUE	Empty	PDZ domain-containing protein GIPC1 OS=Homo sapiens OX=9606 GN=GIPC1 PE=1 SV=2	O14908 (+1)	GIPC1	36 kDa		Homo sapiens	0	0	1.7805	0
1025	TRUE	Empty	Isoform 3 of Macrophage colony-stimulating factor 1 OS=Homo sapiens OX=9606 GN=CSF1	P09603-3	CSF1	29 kDa		unknown	0	0	0	1.4996
1026	TRUE	Empty	Calsyntenin-3 OS=Homo sapiens OX=9606 GN=CLSTN3 PE=1 SV=1	Q9BQT9 (+1)	CLSTN3	106 kDa		Homo sapiens	0	0	0	1.4996
1027	TRUE	Empty	Phosphatidylinositol-binding clathrin assembly protein OS=Homo sapiens OX=9606 GN=PICALM PE=1 SV=2	Q13492 (+3)	PICALM	71 kDa		Homo sapiens	0	0	0	1.4996
1028	TRUE	Empty	Endophilin-A2 OS=Homo sapiens OX=9606 GN=SH3GL1 PE=1 SV=1	Q99961	SH3GL1	41 kDa		Homo sapiens	0	1.3892	0	0
1029	TRUE	Empty	Ataxin-10 OS=Homo sapiens OX=9606 GN=ATXN10 PE=1 SV=1	Q9UBB4 (+1)	ATXN10	53 kDa		Homo sapiens	0	0	0	1.4996
1030	TRUE	Empty	Beta-mannosidase OS=Homo sapiens OX=9606 GN=MANBA PE=2 SV=3	O00462	MANBA	101 kDa		Homo sapiens	0	1.3892	0	0
1031	TRUE	Empty	Zymogen granule protein 16 homolog B OS=Homo sapiens OX=9606 GN=ZG16B PE=1 SV=3	Q96DA0	ZG16B	23 kDa		Homo sapiens	0	0	0	1.4996
1032	TRUE	Empty	Lipocalin-1 OS=Homo sapiens OX=9606 GN=LCN1 PE=1 SV=1	P31025	LCN1	19 kDa		Homo sapiens	19.35	0	0	0
1033	TRUE	Empty	Ubiquitin-associated protein 2-like OS=Homo sapiens OX=9606 GN=UBAP2L PE=1 SV=2	Q14157 (+4)	UBAP2L	115 kDa		Homo sapiens	0	2.0839	0	0
1034	TRUE	Empty	L-amino-acid oxidase OS=Homo sapiens OX=9606 GN=IL4I1 PE=1 SV=1	Q96RQ9 (+1)	IL4I1	63 kDa		Homo sapiens	0	0	0	1.4996
1035	TRUE	Empty	Protein SGT1 homolog OS=Homo sapiens OX=9606 GN=SUGT1 PE=1 SV=3	Q9Y2Z0 (+1)	SUGT1	41 kDa		Homo sapiens	0	1.3892	0	0
1036	TRUE	Empty	Protein-tyrosine sulfotransferase 1 OS=Homo sapiens OX=9606 GN=TPST1 PE=1 SV=1	O60507	TPST1	42 kDa		Homo sapiens	0	0	0	1.4996
1037	TRUE	Empty	Fumarylacetoacetase OS=Homo sapiens OX=9606 GN=FAH PE=1 SV=2	P16930	FAH	46 kDa		Homo sapiens	0	0	1.7805	0
1038	TRUE	Empty	Cellular nucleic acid-binding protein OS=Homo sapiens OX=9606 GN=CNBP PE=1 SV=1	P62633 (+5)	CNBP	19 kDa		Homo sapiens	0	1.3892	0	0
1039	TRUE	Empty	Mannosyl-oligosaccharide glucosidase OS=Homo sapiens OX=9606 GN=MOGS PE=1 SV=5	Q13724 (+1)	MOGS	92 kDa		Homo sapiens	0	0	1.7805	0
1040	TRUE	Empty	Protein unc-13 homolog D OS=Homo sapiens OX=9606 GN=UNC13D PE=1 SV=1	Q70J99 (+1)	UNC13D	123 kDa		Homo sapiens	0	0	1.7805	0
1041	TRUE	Empty	Charged multivesicular body protein 4b OS=Homo sapiens OX=9606 GN=CHMP4B PE=1 SV=1	Q9H444	CHMP4B	25 kDa		Homo sapiens	0	1.3892	0	0
1042	TRUE	Empty	Endothelial lipase OS=Homo sapiens OX=9606 GN=LIPG PE=1 SV=1	Q9Y5X9 (+1)	LIPG	57 kDa		Homo sapiens	0	0	0	1.4996
1043	TRUE	Empty	Splicing factor 3B subunit 4 OS=Homo sapiens OX=9606 GN=SF3B4 PE=1 SV=1	Q15427	SF3B4	44 kDa		Homo sapiens	0	1.3892	0	0
END OF FILE
