# Supplementary material for: Comparative Analysis of Co-Cultured Amniotic Cell-Conditioned Media with Cell-Free Amniotic Fluid Reveals Differential Effects on Epithelial–Mesenchymal Transition and Myofibroblast Activation
Source: Biomedicines. 2022 Sep 5;10(9):2189. doi: 10.3390/biomedicines10092189 (PMC9495976; doi:10.3390/biomedicines10092189)
Supplement: Supplementary file 1 [file biomedicines-10-02189-s001.zip › Table S2.xlsx]

## Sheet: 24hVIM-Phallodin
Database Name	ODA			row 3= C2C12		media	row	column
Database Link	http://localhost/ODA/OdaService.asmx			row 7= MMM		uncSFM	3or7	2
Evaluation GUID	4b936fc9-a983-48c1-8d9d-0528e4de405f					SFM+10%AF	3or7	4
Plate Name	24h_C2C12-MMM_SFM-AF-coACCM-DMEM10FBS_Vim647-Phalloidin488					SFM+10%AF	3or7	5
Measurement	Measurement1					coACCM	3or7	7
Evaluation	Evaluation2					coACCM	3or7	8
Population	Population - Nuclei					complMedia	3or7	10
						complMedia	3or7	11
[Data]												DAPI	CELL_phalloidin488	NUCL_phalloidin488		CELL_vimentin647	NUCL_vimentin647
Row	Column	Timepoint	Field	Object No	X	Y	Bounding Box	Compound	Concentration	Cell Type	Cell Count	Nuclei - Intensity Nucleus DAPI Mean	Nuclei - Intensity Cell Alexa 488 Mean	Nuclei - Intensity Nucleus Alexa 488 Mean	SUM_phalloidin488	Nuclei - Intensity Cell Alexa 647 Mean	Nuclei - Intensity Nucleus Alexa 647 Mean	SUM_vimentin647
3	1	0	1	1	1012	16	[1003,8,1019,28]					496.426	196.641	196.431	393.072	307.696	307.101	614.797
3	1	0	1	2	830	9	[819,1,844,36]					404.587	207.826	216.477	424.303	364.767	367.569	732.336
3	1	0	1	3	789	24	[757,1,822,51]					322.614	211.947	216.455	428.402	382.809	397.83	780.639
3	1	0	1	4	396	24	[370,1,439,50]					442.914	221.605	238.172	459.777	429.728	439.161	868.889
3	1	0	1	5	1002	31	[992,24,1008,43]					554.157	202.166	204.778	406.944	325.431	327.315	652.746
3	1	0	1	6	1057	35	[1052,27,1063,44]					542.972	190.945	190.945	381.89	308.648	308.648	617.296
3	1	0	1	7	855	36	[829,1,878,68]					401.144	209.512	217.694	427.206	391.257	407.297	798.554
3	1	0	1	8	944	41	[937,33,966,53]					443.632	202.64	206.094	408.734	336.571	337.198	673.769
3	1	0	1	9	928	33	[905,26,939,68]					481.723	203.83	214.92	418.75	345.934	353.652	699.586
3	1	0	1	10	686	33	[640,1,731,74]					369.96	222.362	233.182	455.544	410.759	420.495	831.254
3	1	0	1	11	319	45	[234,1,391,90]					517.888	218.943	236.276	455.219	429.559	460.622	890.181
3	1	0	1	12	414	54	[368,34,431,79]					453.513	227.316	233.88	461.196	456.487	477	933.487
3	1	0	1	13	170	109	[142,55,196,123]					548.71	205.864	212.215	418.079	648.415	856.097	1504.51
3	1	0	1	14	890	68	[868,1,914,102]					737.954	211.698	238.295	449.993	372.01	381.006	753.016
3	1	0	1	15	657	74	[627,14,674,100]					593.687	230.181	248.296	478.477	439.516	446.113	885.629
3	1	0	1	16	996	84	[979,76,1007,91]					453.872	208.169	213.632	421.801	333.256	333.624	666.88
3	1	0	1	17	155	83	[136,75,167,97]					352.947	202.342	209.149	411.491	691.653	821.553	1513.21
3	1	0	1	18	420	97	[338,48,460,131]					537.607	231.575	234.931	466.506	469.255	497.69	966.945
3	1	0	1	19	1074	92	[1062,89,1078,97]					509.633	192.292	192.292	384.584	317.608	317.608	635.216
3	1	0	1	20	963	106	[938,82,979,119]					702.79	214.201	232.389	446.59	353.713	358.938	712.651
3	1	0	1	21	994	96	[984,91,1006,104]					556.196	205.89	208.559	414.449	339.442	343.363	682.805
3	1	0	1	22	1019	117	[1012,94,1043,125]					479.809	198.907	200.532	399.439	334.575	333.793	668.368
3	1	0	1	23	925	85	[911,76,945,110]					597.28	215.359	234.206	449.565	357.29	374.589	731.879
3	1	0	1	24	471	45	[429,1,509,149]					567.174	231.031	250.271	481.302	462.5	503.264	965.764
3	1	0	1	25	902	115	[872,87,956,153]					633.814	213.886	238.229	452.115	374.699	374.398	749.097
3	1	0	1	26	624	112	[582,1,686,155]					680.407	234.901	262.699	497.6	461.327	496.642	957.969
3	1	0	1	27	853	93	[815,67,874,139]					691.56	219.042	248.647	467.689	398.681	414.328	813.009
3	1	0	1	28	51	121	[36,111,57,129]					426.642	198.375	198.423	396.798	397.415	396.54	793.955
3	1	0	1	29	724	83	[673,1,767,148]					396.31	227.372	238.35	465.722	438.518	447.5	886.018
3	1	0	1	30	793	85	[737,28,853,145]					522.197	222.663	238.945	461.608	412.468	436.976	849.444
3	1	0	1	31	796	133	[787,125,802,147]					395.578	227.569	232.867	460.436	431.504	430.633	862.137
3	1	0	1	32	553	49	[479,1,607,167]					475.064	234.912	247.016	481.928	464.083	490.728	954.811
3	1	0	1	33	843	146	[829,134,855,157]					484.402	223.416	233.824	457.24	421.465	431.873	853.338
3	1	0	1	34	944	161	[912,129,982,203]					634.608	210.296	228.717	439.013	371.223	377.897	749.12
3	1	0	1	35	801	163	[758,104,839,192]					601.611	229.165	279.214	508.379	439.571	468.656	908.227
3	1	0	1	36	875	145	[820,99,914,194]					612.718	219.11	235.993	455.103	411.906	434.444	846.35
3	1	0	1	37	1043	169	[1038,162,1052,174]					272.845	184.649	184.649	369.298	331.268	331.268	662.536
3	1	0	1	38	131	172	[80,147,152,191]					745.834	206.254	224.476	430.73	480.686	479.39	960.076
3	1	0	1	39	991	174	[975,156,1014,198]					545.247	201.644	207.132	408.776	368.808	382.063	750.871
3	1	0	1	40	1026	187	[1019,181,1038,198]					383.813	195.632	194.125	389.757	340.104	342.05	682.154
3	1	0	1	41	367	164	[202,43,444,232]					351.589	228.682	243.844	472.526	490.931	488.4	979.331
3	1	0	1	42	118	198	[89,186,130,210]					527.132	204.358	214.736	419.094	503.991	526.242	1030.23
3	1	0	1	43	968	205	[945,182,1010,233]					597.952	206.892	221.868	428.76	363.099	376.476	739.575
3	1	0	1	44	876	206	[846,161,921,236]					907.401	220.281	248.947	469.228	414.082	434.348	848.43
3	1	0	1	45	213	158	[166,113,299,264]					417.505	224.505	247.021	471.526	543.779	534.371	1078.15
3	1	0	1	46	198	219	[143,163,246,263]					440.99	217.35	234.542	451.892	542.923	568.76	1111.68
3	1	0	1	47	911	219	[891,193,968,235]					555.402	214.617	231.908	446.525	397.345	418.368	815.713
3	1	0	1	48	825	213	[798,183,870,242]					970.213	230.329	260.746	491.075	636.408	4156.29	4792.7
3	1	0	1	49	789	224	[771,188,804,242]					584.914	236.553	258.108	494.661	466.018	496.935	962.953
3	1	0	1	50	143	216	[88,186,172,253]					675.741	209.661	221.835	431.496	547.826	582.302	1130.13
3	1	0	1	51	591	205	[435,133,701,277]					598.531	247.08	266.124	513.204	490.996	500.007	991.003
3	1	0	1	52	940	237	[902,222,961,254]					518.427	213.077	226.556	439.633	403.252	422.944	826.196
3	1	0	1	53	1004	250	[991,236,1025,274]					311.607	202.537	200.371	402.908	363.422	358.079	721.501
3	1	0	1	54	107	251	[74,232,161,275]					567.609	208.932	226.011	434.943	602.625	825.967	1428.59
3	1	0	1	55	744	282	[711,225,782,310]					439.417	244.415	254.306	498.721	472.854	483.889	956.743
3	1	0	1	56	17	286	[3,275,31,298]					715.559	211.76	218.316	430.076	455.829	450.118	905.947
3	1	0	1	57	794	261	[762,235,840,325]					692.902	239.574	258.588	498.162	468.743	476.32	945.063
3	1	0	1	58	151	293	[132,284,175,305]					938.174	563.295	567.554	1130.85	34159.7	23444.2	57603.9
3	1	0	1	59	281	279	[235,249,315,319]					284.811	236.576	240.511	477.087	526.171	524.744	1050.91
3	1	0	1	60	718	210	[664,135,793,337]					437.172	243.734	266.009	509.743	474.939	488.543	963.482
3	1	0	1	61	854	274	[798,230,935,323]					767.989	229.065	266.057	495.122	449.877	483.466	933.343
3	1	0	1	62	634	311	[617,274,654,335]					434.044	257.572	260.219	517.791	512.565	519.701	1032.27
3	1	0	1	63	230	299	[186,289,249,325]					506.356	541.327	537.231	1078.56	28307.9	52666.3	80974.2
3	1	0	1	64	104	322	[91,295,135,335]					591.784	645.582	758.477	1404.06	51625.9	64417.2	116043
3	1	0	1	65	71	321	[51,310,88,331]					781.98	213.31	236.98	450.29	861.952	1250.35	2112.3
3	1	0	1	66	318	241	[230,181,372,369]					543.311	242.021	254.864	496.885	525.796	572.735	1098.53
3	1	0	1	67	1005	332	[956,304,1034,356]					351.796	207.568	218.409	425.977	384.376	399.032	783.408
3	1	0	1	68	452	284	[367,181,673,378]					711.398	254.92	281.367	536.287	510.817	576.714	1087.53
3	1	0	1	69	90	339	[58,329,103,364]					910.318	558.443	581.912	1140.36	33159.5	41109.1	74268.6
3	1	0	1	70	796	343	[739,296,863,382]					674.386	244.159	266.28	510.439	477.873	499.803	977.676
3	1	0	1	71	129	354	[110,341,153,371]					571.091	495.042	612.098	1107.14	42364.1	54492.5	96856.6
3	1	0	1	72	190	360	[177,344,216,377]					860.388	236.296	256.155	492.451	809.195	948.214	1757.41
3	1	0	1	73	89	359	[64,336,114,385]					619.632	481.484	587.902	1069.39	28143.9	38816.6	66960.5
3	1	0	1	74	727	355	[702,307,763,380]					373.636	254.45	264.161	518.611	506.419	516.314	1022.73
3	1	0	1	75	166	352	[149,338,187,375]					562.805	351.455	299.496	650.951	19417.5	6420.28	25837.8
3	1	0	1	76	233	377	[197,358,274,398]					686.326	237.674	246.568	484.242	540.785	535.295	1076.08
3	1	0	1	77	656	370	[605,231,716,459]					508.048	260.266	268.419	528.685	516.805	545.967	1062.77
3	1	0	1	78	1015	392	[1006,378,1033,412]					266.857	203.719	204.79	408.509	367.257	365.8	733.057
3	1	0	1	79	925	311	[825,242,978,424]					651.973	225.64	247.209	472.849	437.888	459.436	897.324
3	1	0	1	80	357	356	[316,313,392,421]					695.782	250.847	261.586	512.433	520.601	544.192	1064.79
3	1	0	1	81	296	401	[231,357,339,453]					629.026	246.344	262.91	509.254	546.271	549.624	1095.89
3	1	0	1	82	902	373	[861,332,1008,423]					563.947	226.585	251.871	478.456	439.906	470.754	910.66
3	1	0	1	83	191	395	[164,372,238,428]					542.207	235.406	267.152	502.558	608.002	958.12	1566.12
3	1	0	1	84	148	399	[132,386,168,418]					479.242	225.866	242.319	468.185	594.006	593.538	1187.54
3	1	0	1	85	522	427	[407,359,636,500]					815.118	262.748	282.901	545.649	538.639	582.388	1121.03
3	1	0	1	86	348	427	[309,400,384,451]					715.66	251.097	266.767	517.864	530.663	570.951	1101.61
3	1	0	1	87	930	396	[901,363,1016,429]					425.545	219.927	235.331	455.258	418.93	439.05	857.98
3	1	0	1	88	970	421	[940,395,1011,442]					359.39	220.915	230.331	451.246	424.325	424.669	848.994
3	1	0	1	89	168	425	[140,403,193,452]					726.344	228.354	241.313	469.667	506.897	509.211	1016.11
3	1	0	1	90	1028	429	[1014,403,1044,447]					475.875	206.778	215.528	422.306	379.466	396.443	775.909
3	1	0	1	91	931	452	[866,414,1012,511]					449.857	230.041	239.755	469.796	429.322	430.684	860.006
3	1	0	1	92	216	434	[166,413,236,467]					704.933	233.522	247.189	480.711	499.422	504.422	1003.84
3	1	0	1	93	120	440	[73,411,155,478]					515.443	224.165	256.423	480.588	496.944	682.33	1179.27
3	1	0	1	94	63	464	[40,416,104,513]					849.948	215.649	233.052	448.701	601.713	465.753	1067.47
3	1	0	1	95	390	456	[291,430,412,488]					502.272	254.181	274.412	528.593	510.317	510.018	1020.34
3	1	0	1	96	988	460	[961,430,1009,488]					425.308	226.585	227.046	453.631	452.441	397.654	850.095
3	1	0	1	97	371	477	[300,453,387,496]					760.98	252.927	277.598	530.525	493.379	505.314	998.693
3	1	0	1	98	268	467	[223,432,299,511]					820.75	241.091	260.743	501.834	476.109	490.618	966.727
3	1	0	1	99	29	488	[10,474,44,502]					499.903	204.833	213.767	418.6	433.717	441.252	874.969
3	1	0	1	100	450	487	[377,363,504,539]					1043.81	261.042	292.574	553.616	569.275	649.24	1218.51
3	1	0	1	101	137	501	[98,450,170,536]					691.216	232.869	314.069	546.938	513.616	1092.82	1606.44
3	1	0	1	102	380	526	[353,482,405,572]					620.673	255.662	265.485	521.147	545.427	542.921	1088.35
3	1	0	1	103	286	518	[269,502,305,544]					476.035	244.991	255.909	500.9	476.178	468.545	944.723
3	1	0	1	104	324	502	[291,463,362,549]					484.98	251.101	260.061	511.162	522.519	509.091	1031.61
3	1	0	1	105	77	536	[16,469,133,590]					672.87	214.067	240.13	454.197	443.34	484.96	928.3
3	1	0	1	106	13	523	[1,507,33,547]					441.049	203.876	210.415	414.291	424.262	425.764	850.026
3	1	0	1	107	204	500	[146,452,276,572]					516.351	235.882	245.387	481.269	481.688	480.468	962.156
3	1	0	1	108	697	499	[631,441,934,560]					475.78	255.539	266.04	521.579	522.434	547.94	1070.37
3	1	0	1	109	588	515	[500,431,675,581]					325.247	264.672	270.086	534.758	555.399	539.839	1095.24
3	1	0	1	110	131	568	[61,526,162,604]					464.773	219.961	243.182	463.143	431.361	452.557	883.918
3	1	0	1	111	283	557	[259,528,330,579]					437.439	244.038	250.588	494.626	477.96	489.614	967.574
3	1	0	1	112	245	559	[226,534,278,585]					871.333	242.48	257.022	499.502	482.456	496.904	979.36
3	1	0	1	113	434	570	[381,521,506,609]					626.01	259.28	265.117	524.397	597.139	627.903	1225.04
3	1	0	1	114	209	573	[124,539,249,604]					448.822	231.34	251.584	482.924	462.696	491.584	954.28
3	1	0	1	115	335	578	[253,539,383,638]					491.043	251.143	264.366	515.509	508.593	526.548	1035.14
3	1	0	1	116	662	571	[637,548,705,603]					626.469	262.173	274.031	536.204	525.023	579.052	1104.08
3	1	0	1	117	846	561	[688,494,1002,631]					446.095	241.132	256.257	497.389	467.628	505.962	973.59
3	1	0	1	118	653	619	[594,576,686,638]					661.128	262.569	282.427	544.996	549.929	559.017	1108.95
3	1	0	1	119	250	611	[195,577,294,653]					1125.39	239.691	274.111	513.802	499.985	536.899	1036.88
3	1	0	1	120	720	627	[629,590,834,680]					566.989	258.029	275.044	533.073	522.742	557.844	1080.59
3	1	0	1	121	1021	653	[1000,607,1053,689]					334.504	210.103	215.241	425.344	407.758	404.766	812.524
3	1	0	1	122	42	616	[1,584,70,649]					421.686	209.929	225.876	435.805	405.183	425.57	830.753
3	1	0	1	123	474	620	[421,567,521,675]					659.136	261.768	274.125	535.893	629.376	709.568	1338.94
3	1	0	1	124	554	613	[498,559,610,670]					664.949	263.259	275.398	538.657	644.331	501.622	1145.95
3	1	0	1	125	352	633	[315,606,396,665]					1137.96	254.983	278.133	533.116	508.806	561.143	1069.95
3	1	0	1	126	870	638	[813,578,999,671]					346.102	232.382	251.178	483.56	498.858	543.756	1042.61
3	1	0	1	127	612	639	[583,598,648,674]					512.411	263.861	266.779	530.64	551.883	516.558	1068.44
3	1	0	1	128	321	668	[289,621,347,699]					834.886	256.2	321.741	577.941	589.091	1303.17	1892.26
3	1	0	1	129	68	662	[33,622,93,704]					349.175	212.078	219.883	431.961	442.599	447.951	890.55
3	1	0	1	130	170	633	[65,585,231,700]					346.783	223.569	240.687	464.256	466.061	478.852	944.913
3	1	0	1	131	277	665	[220,635,302,687]					797.146	244.516	270.028	514.544	527.014	577.611	1104.62
3	1	0	1	132	346	696	[324,657,364,720]					685.719	256.981	270.843	527.824	494.76	493.242	988.002
3	1	0	1	133	456	667	[424,624,500,714]					891.214	262.142	281.66	543.802	585.682	562.68	1148.36
3	1	0	1	134	22	671	[1,640,49,706]					523.198	206.955	228.165	435.12	413.598	435.703	849.301
3	1	0	1	135	640	691	[591,661,692,753]					542.38	263.447	273.503	536.95	540.009	531.602	1071.61
3	1	0	1	136	595	685	[581,667,612,703]					386.143	263.521	272.366	535.887	539.243	564.982	1104.22
3	1	0	1	137	413	654	[365,576,441,712]					723.028	259.306	274.813	534.119	555.278	528.187	1083.47
3	1	0	1	138	248	698	[191,662,302,735]					602.582	242.03	259.064	501.094	503.849	535.092	1038.94
3	1	0	1	139	829	684	[790,660,860,727]					367.359	247.7	251.94	499.64	551.947	563.274	1115.22
3	1	0	1	140	382	687	[358,650,404,739]					656.893	263.827	284.252	548.079	510.722	512.786	1023.51
3	1	0	1	141	529	694	[488,654,600,733]					846.504	264.147	283.982	548.129	689.899	623.142	1313.04
3	1	0	1	142	952	714	[942,696,967,729]					427.545	1425.41	1029.25	2454.66	35542.4	19761	55303.4
3	1	0	1	143	320	707	[283,692,347,766]					751.867	253.677	275.875	529.552	514.292	536.367	1050.66
3	1	0	1	144	419	723	[390,688,460,779]					931.454	264.626	288.481	553.107	544.657	596.991	1141.65
3	1	0	1	145	744	707	[682,636,827,808]					353.696	257.184	265.8	522.984	520.79	494.632	1015.42
3	1	0	1	146	460	725	[429,696,531,756]					961.25	263.774	292.655	556.429	551.938	549.319	1101.26
3	1	0	1	147	567	748	[509,719,608,780]					607.911	264.879	272.111	536.99	546.976	554.444	1101.42
3	1	0	1	148	918	754	[886,725,948,783]					10137.6	1374.43	2066.41	3440.84	45981.9	65440.8	111423
3	1	0	1	149	670	753	[631,710,720,802]					457.046	266.029	268.626	534.655	530.95	513.084	1044.03
3	1	0	1	150	360	739	[331,715,387,761]					828.43	260.411	273.788	534.199	508.368	490.199	998.567
3	1	0	1	151	281	741	[237,718,323,765]					510.436	248.772	270.923	519.695	511.873	579.735	1091.61
3	1	0	1	152	385	782	[306,718,429,839]					817.532	261.279	282.67	543.949	503.308	506.213	1009.52
3	1	0	1	153	824	778	[758,729,911,838]					447.961	244.695	260.673	505.368	492.601	519.908	1012.51
3	1	0	1	154	594	804	[524,728,653,887]					819.053	263.259	285.074	548.333	524.928	531.421	1056.35
3	1	0	1	155	164	768	[55,668,353,871]					908.085	231.068	284.993	516.061	464.547	527.423	991.97
3	1	0	1	156	479	797	[409,749,546,846]					811.372	264.089	284.979	549.068	514.914	535.917	1050.83
3	1	0	1	157	140	902	[73,804,297,966]					481.055	229.738	251.75	481.488	473.407	487.117	960.524
3	1	0	1	158	861	847	[779,812,950,879]					646.068	238.012	275.773	513.785	459.724	503	962.724
3	1	0	1	159	675	830	[618,788,749,879]					1034.63	261.005	293.471	554.476	534.997	587.309	1122.31
3	1	0	1	160	749	830	[712,794,784,857]					663.086	253.639	272.731	526.37	521.514	541.237	1062.75
3	1	0	1	161	921	855	[895,821,989,880]					422.706	218.576	234.278	452.854	417.48	445.532	863.012
3	1	0	1	162	386	875	[318,818,424,928]					641	256.261	272.272	528.533	493.235	476.054	969.289
3	1	0	1	163	781	858	[766,842,817,889]					753.318	248.577	271.625	520.202	488.92	532.352	1021.27
3	1	0	1	164	268	991	[121,852,384,1078]					689.619	233.631	280.61	514.241	449.734	548.771	998.505
3	1	0	1	165	757	870	[744,856,772,890]					497.543	251.15	259.762	510.912	512.828	521.657	1034.49
3	1	0	1	166	952	880	[925,854,1013,906]					441.932	213.229	237.273	450.502	431.908	1032.53	1464.44
3	1	0	1	167	469	882	[383,833,542,939]					691.07	260.201	284.42	544.621	498.137	499.36	997.497
3	1	0	1	168	661	884	[604,853,684,928]					987.05	261.086	293.129	554.215	519.497	531.238	1050.74
3	1	0	1	169	786	891	[769,878,797,905]					453.172	249.343	253.819	503.162	474.603	481.267	955.87
3	1	0	1	170	687	926	[671,859,737,950]					583.803	257.123	275.803	532.926	514.862	539.176	1054.04
3	1	0	1	171	804	910	[780,865,852,929]					684.827	243.201	266.638	509.839	448.061	457.939	906
3	1	0	1	172	747	894	[721,869,785,915]					737.028	251.514	270	521.514	484.511	500.021	984.532
3	1	0	1	173	576	890	[539,854,620,948]					890.407	258.708	279.491	538.199	523.076	547.963	1071.04
3	1	0	1	174	630	901	[605,873,654,932]					569.018	262.538	284.036	546.574	514.428	558.182	1072.61
3	1	0	1	175	915	925	[901,897,930,950]					339.441	216.82	223.657	440.477	393.152	396.186	789.338
3	1	0	1	176	847	911	[817,855,930,967]					590.852	229.719	256.303	486.022	421.64	450.742	872.382
3	1	0	1	177	874	909	[862,888,886,924]					583.089	233.282	244.067	477.349	429.526	448.452	877.978
3	1	0	1	178	703	911	[691,902,729,926]					555.241	256.697	270.821	527.518	500.078	511.205	1011.28
3	1	0	1	179	995	912	[987,906,1009,924]					437.008	219.567	211.211	430.778	362.786	362.927	725.713
3	1	0	1	180	736	930	[714,903,776,961]					731.909	249.947	271.804	521.751	494.801	497.629	992.43
3	1	0	1	181	947	932	[916,891,977,956]					532.563	212.374	233.174	445.548	388.021	412.326	800.347
3	1	0	1	182	529	929	[504,899,561,986]					699.835	254.798	277.583	532.381	519.539	556.957	1076.5
3	1	0	1	183	889	924	[862,898,906,941]					456.022	229.02	245.753	474.773	413.511	441.18	854.691
3	1	0	1	184	657	945	[610,918,684,977]					956.913	262.28	292.525	554.805	576.028	608.592	1184.62
3	1	0	1	185	984	944	[968,924,1005,959]					689.127	204.892	218.282	423.174	386.984	389.464	776.448
3	1	0	1	186	819	946	[791,919,882,971]					775.302	235.802	264.553	500.355	435.043	472.453	907.496
3	1	0	1	187	771	951	[738,914,802,987]					749.067	245.366	277.71	523.076	489.023	531.021	1020.04
3	1	0	1	188	431	1000	[308,910,523,1078]					546.011	243.527	270.156	513.683	449.93	500.956	950.886
3	1	0	1	189	916	963	[896,939,972,1007]					630.556	210.225	235.75	445.975	377.514	384.84	762.354
3	1	0	1	190	694	952	[681,938,728,969]					584.775	251.336	266.814	518.15	508.485	502.167	1010.65
3	1	0	1	191	626	982	[595,926,690,1057]					968.054	254.422	279.94	534.362	597.79	578.299	1176.09
3	1	0	1	192	578	964	[549,932,603,986]					851.422	256.364	285.086	541.45	559.782	568.219	1128
3	1	0	1	193	717	992	[675,956,751,1029]					511.844	242.55	255.311	497.861	478.108	491.859	969.967
3	1	0	1	194	792	972	[778,961,808,996]					545.453	240.525	253.726	494.251	446.927	446.653	893.58
3	1	0	1	195	834	978	[805,957,857,999]					471.268	231.185	247.804	478.989	414.53	410.577	825.107
3	1	0	1	196	888	983	[864,958,938,1008]					627.506	219.192	251.462	470.654	389.441	400.853	790.294
3	1	0	1	197	981	1001	[966,986,991,1026]					431.948	206.565	208.181	414.746	357.375	362.94	720.315
3	1	0	1	198	798	1000	[781,979,832,1036]					592.958	232.152	254.979	487.131	404.979	420.208	825.187
3	1	0	1	199	764	1030	[720,983,832,1078]					535.441	227.859	252.352	480.211	407.569	433.297	840.866
3	1	0	1	200	668	998	[643,984,698,1025]					580.109	247.776	265.064	512.84	513.923	516.191	1030.11
3	1	0	1	201	866	1015	[840,970,936,1040]					536.309	219.073	229.76	448.833	379.609	394.844	774.453
3	1	0	1	202	835	1012	[808,987,853,1034]					630.592	228.715	242.116	470.831	395.949	418.755	814.704
3	1	0	1	203	705	1046	[669,1000,738,1078]					707.922	233.604	270.722	504.326	436.189	488.348	924.537
3	1	0	1	204	556	1027	[487,974,636,1078]					324.777	242.074	249.795	491.869	499.609	624.839	1124.45
3	1	0	1	205	957	1017	[947,1010,966,1036]					480.677	202.782	204.101	406.883	343.199	344.596	687.795
3	1	0	1	206	993	1017	[987,1008,1013,1031]					293.641	195.253	192.359	387.612	341.43	342.077	683.507
3	1	0	1	207	657	1051	[631,1009,685,1078]					249.885	236.799	243.849	480.648	451.847	445.424	897.271
3	1	0	1	208	964	1037	[948,1030,980,1058]					396.575	201.084	201.198	402.282	333.453	331.726	665.179
3	1	0	1	209	846	1056	[818,1027,888,1078]					689.369	214.348	237.036	451.384	375.583	394.784	770.367
3	1	0	1	210	896	1055	[870,1021,933,1078]					582.408	205.587	217.2	422.787	351.057	353.232	704.289
3	1	0	1	211	1016	1067	[1006,1061,1024,1077]					629.378	199.436	200.223	399.659	321.089	320.585	641.674
3	1	0	1	212	970	1068	[958,1063,977,1077]					514.669	204.042	205.869	409.911	328.667	330.393	659.06
3	1	0	1	213	764	411	[688,350,873,457]					459.527	250.072	271.419	521.491	495.977	523.194	1019.17
3	1	0	1	214	164	314	[106,291,195,350]					10144.6	702.44	919.696	1622.14	59162	61622.1	120784
3	1	0	1	215	911	713	[864,692,943,735]					6439.84	1399.45	1898.87	3298.32	50213.2	64222.5	114436
3	1	0	2	1	640	11	[595,1,698,22]					3444.85	2672.79	2369.1	5041.89	19251.4	15372.9	34624.3
3	1	0	2	2	722	19	[683,1,840,37]					3544.77	2070.19	1666.44	3736.63	23750.3	26610	50360.3
3	1	0	2	3	825	7	[790,1,934,13]					8471.22	1615.55	1360.3	2975.85	45030.6	52370.9	97401.5
3	1	0	2	4	504	20	[480,1,526,45]					5341.16	2843.34	3609.07	6452.41	13304	17847.8	31151.8
3	1	0	2	5	431	25	[369,1,478,82]					4857.41	4864.25	5492.31	10356.6	2776.11	1010.65	3786.76
3	1	0	2	6	471	41	[414,10,495,81]					5741.76	2804.71	4354.95	7159.66	18627.7	22848.1	41475.8
3	1	0	2	7	379	41	[343,11,410,63]					7408.96	4598.06	5296.76	9894.82	732.931	745.063	1477.99
3	1	0	2	8	601	43	[580,13,693,76]					6360.8	3313.8	3682.53	6996.33	26394.2	32958.3	59352.5
3	1	0	2	9	403	51	[389,38,414,71]					9270.09	5470	4939.08	10409.1	2283.88	1164.33	3448.21
3	1	0	2	10	389	70	[371,60,404,85]					10012.4	4018.08	4853.76	8871.84	2488.29	1352.22	3840.51
3	1	0	2	11	652	86	[633,66,705,105]					6409.14	1755.59	1709.25	3464.84	35157.9	39429.3	74587.2
3	1	0	2	12	611	84	[566,68,636,112]					5834.12	3117.93	2755.84	5873.77	24057.5	27499.2	51556.7
3	1	0	2	13	531	99	[519,90,541,107]					852.673	355.149	374.185	729.334	1470.77	1679.57	3150.34
3	1	0	2	14	490	144	[485,139,498,149]					850.351	915.394	915.394	1830.79	7006.45	7006.45	14012.9
3	1	0	2	15	394	177	[379,167,405,189]					813.172	682.621	852.441	1535.06	3635.56	5089.79	8725.35
3	1	0	2	16	427	178	[406,148,443,223]					946.909	1524.36	1774.46	3298.82	20455.1	14890.3	35345.4
3	1	0	2	17	352	193	[336,175,366,216]					965.092	338.541	656.704	995.245	1072.11	2083.97	3156.08
3	1	0	2	18	372	223	[363,193,382,233]					1004.04	1536.95	2221.87	3758.82	10023.3	15202.4	25225.7
3	1	0	2	19	478	228	[450,189,499,251]					1119.99	288.055	312.765	600.82	741.478	810.118	1551.6
3	1	0	2	20	231	232	[198,205,278,258]					9391.21	2280.75	2320.82	4601.57	10933.5	13043.5	23977
3	1	0	2	21	429	257	[416,242,440,296]					994.955	2166.04	2045.17	4211.21	39084.4	20289.8	59374.2
3	1	0	2	22	378	244	[328,181,417,310]					968.59	2116.18	2908.91	5025.09	20696.8	22649.3	43346.1
3	1	0	2	23	268	276	[235,253,292,304]					15662	3298.13	4964.76	8262.89	36220.6	65260.8	101481
3	1	0	2	24	206	297	[185,280,236,314]					4230.6	2440.04	2365.86	4805.9	25170.9	23369.5	48540.4
3	1	0	2	25	322	311	[312,301,331,333]					849.733	1259.98	1608.87	2868.85	12123.9	16670.4	28794.3
3	1	0	2	26	149	329	[115,314,165,410]					4638.56	1848.51	2208.89	4057.4	29120.6	22810.3	51930.9
3	1	0	2	27	239	311	[226,296,319,345]					906.629	1953.59	876.129	2829.72	22925.1	10837	33762.1
3	1	0	2	28	303	410	[256,336,336,441]					1031.5	284.641	706.792	991.433	1632.31	24550.3	26182.6
3	1	0	2	29	343	359	[321,342,369,388]					1127.18	447.128	703.236	1150.36	6243.98	21972.1	28216.1
3	1	0	2	30	199	396	[161,361,249,434]					1104.2	258.492	295.968	554.46	678.658	730.662	1409.32
3	1	0	2	31	166	407	[146,391,187,431]					987.87	264.911	289.577	554.488	748.238	766.937	1515.18
3	1	0	2	32	260	394	[233,372,280,438]					851.665	262.488	290.102	552.59	731.205	819.949	1551.15
3	1	0	2	33	47	394	[10,365,78,492]					4567.16	2802.66	4100.25	6902.91	6594.72	2874	9468.72
3	1	0	2	34	126	443	[110,428,140,463]					871.938	426.374	558.227	984.601	1470.16	2128.71	3598.87
3	1	0	2	35	213	442	[184,403,245,475]					1201.67	268.47	316.81	585.28	752.39	893.248	1645.64
3	1	0	2	36	67	572	[48,553,88,606]					1077.8	267.874	312.032	579.906	1031.48	1444.15	2475.63
3	1	0	2	37	37	763	[1,612,103,822]					848.618	481.172	394.329	875.501	2688.73	1865.34	4554.07
3	1	0	2	38	554	29	[490,1,597,98]					4594.72	2799.45	2769.04	5568.49	17835.6	15730.3	33565.9
3	1	0	2	39	687	26	[676,14,718,41]					4569.96	1853.64	1788.31	3641.95	16227.7	15460.5	31688.2
3	1	0	2	40	654	32	[614,16,696,49]					2887.84	2976.41	2977.79	5954.2	19105	22250	41355
3	1	0	2	41	576	75	[543,39,602,115]					4914.98	2494.99	2028.69	4523.68	21657.3	22720.2	44377.5
3	1	0	2	42	373	107	[308,76,439,176]					11197.4	2741.08	3772.81	6513.89	18082.3	17446.7	35529
3	1	0	2	43	513	159	[480,95,565,204]					5454.82	1924.31	2365.11	4289.42	29961.2	27897.1	57858.3
3	1	0	2	44	571	159	[514,110,612,231]					9603.13	1405.08	1320.23	2725.31	39045.3	63649.3	102695
3	1	0	2	45	407	232	[392,217,423,246]					6719.88	1644.28	1690.85	3335.13	38765.4	39633.4	78398.8
3	1	0	2	46	327	263	[283,212,362,318]					6208.5	1860.86	1829.6	3690.46	24613.1	28814.1	53427.2
3	1	0	2	47	410	282	[380,240,466,360]					9222.76	2572.46	2196.07	4768.53	38215	48118.8	86333.8
3	1	0	2	48	149	290	[92,214,216,368]					3859.13	3417.01	3592.09	7009.1	4600.52	1344.55	5945.07
3	1	0	2	49	86	374	[66,334,114,455]					8438.91	2931.44	3360.84	6292.28	6364.71	3974.89	10339.6
3	1	0	2	50	64	505	[5,482,93,539]					5052.02	2143.26	1859.25	4002.51	20536.1	28631.2	49167.3
3	1	0	2	51	127	491	[69,446,190,545]					5516.37	2463.01	2619.25	5082.26	36226.5	41729.3	77955.8
3	1	0	2	52	187	521	[147,481,230,565]					6991.98	2609.97	2044.88	4654.85	33238.4	31828.6	65067
3	1	0	2	53	94	528	[71,499,118,547]					7909.96	2262.51	2174.95	4437.46	30485.8	33573.2	64059
3	1	0	2	54	27	555	[1,530,60,620]					2804.03	1529.03	1616.58	3145.61	33663	38062.5	71725.5
3	1	0	3	1	218	50	[142,1,267,111]					319.37	208.745	222.098	430.843	358.019	380.576	738.595
3	1	0	3	2	342	79	[196,1,539,158]					308.139	227.677	238.198	465.875	428.704	451.426	880.13
3	1	0	3	3	90	123	[44,56,121,177]					214.801	198.641	192.592	391.233	333.053	337.301	670.354
3	1	0	3	4	918	83	[798,57,941,165]					247.146	213.589	226.202	439.791	382.246	399.798	782.044
3	1	0	3	5	992	181	[983,167,1018,215]					390.186	199.089	202.609	401.698	358.372	367.863	726.235
3	1	0	3	6	926	224	[902,202,943,245]					446.928	212.888	219.979	432.867	389.947	397.196	787.143
3	1	0	3	7	1040	246	[1034,240,1045,256]					279.937	187.514	187.514	375.028	340.207	340.207	680.414
3	1	0	3	8	99	265	[82,248,118,287]					304.182	206.523	212.973	419.496	381.401	389.182	770.583
3	1	0	3	9	964	268	[917,164,1033,309]					259.341	207.496	214.989	422.485	382.39	430.33	812.72
3	1	0	3	10	225	376	[42,226,361,488]					447.99	230.404	246.293	476.697	423.691	450.333	874.024
3	1	0	3	11	90	518	[70,498,109,538]					294.057	211.17	214.023	425.193	393.597	401.466	795.063
3	1	0	3	12	14	524	[1,505,52,545]					255.277	203.263	207.851	411.114	363.929	370.926	734.855
3	1	0	3	13	23	690	[1,652,60,725]					412.536	206.026	224.763	430.789	365.348	381.649	746.997
3	1	0	3	14	979	715	[891,668,1028,779]					363.677	215.775	236.338	452.113	410.957	459.685	870.642
3	1	0	3	15	21	749	[1,724,45,765]					236.609	203.49	203.852	407.342	353.524	347.797	701.321
3	1	0	3	16	1012	847	[996,839,1038,873]					241.451	200.049	202.154	402.203	385.618	386.077	771.695
3	1	0	3	17	981	855	[963,822,1025,906]					392.667	205.923	214.528	420.451	452.437	393.713	846.15
3	1	0	3	18	427	938	[137,778,518,1078]					600.863	244.052	257.784	501.836	451.387	482.043	933.43
3	1	0	3	19	363	872	[328,836,387,899]					610.204	250.961	262.283	513.244	454.213	468.035	922.248
3	1	0	3	20	167	925	[49,820,352,1042]					446.396	227.482	252.771	480.253	443.783	479.417	923.2
3	1	0	3	21	990	940	[965,919,1001,963]					228.788	202.543	200.962	403.505	373.79	360.481	734.271
3	1	0	3	22	599	988	[485,926,714,1078]					241.097	240.959	246.69	487.649	430.931	449.779	880.71
3	1	0	3	23	361	1031	[299,966,456,1078]					565.477	233.954	244.514	478.468	432.737	446.284	879.021
3	1	0	3	24	214	1045	[159,1012,270,1078]					213.253	214.6	224.352	438.952	400.079	417.418	817.497
3	1	0	3	25	578	1057	[557,1027,616,1078]					405.558	233.183	242.922	476.105	409.121	425.457	834.578
3	1	0	3	26	899	962	[817,903,987,1035]					242.716	216.021	234.392	450.413	393.844	427.02	820.864
3	1	0	3	27	551	332	[336,114,962,592]					251.728	252.907	266.094	519.001	461.57	482.616	944.186
3	1	0	3	28	639	575	[509,479,951,673]					248.698	257.948	262.894	520.842	466.494	480.177	946.671
3	1	0	3	29	237	523	[60,457,352,599]					256.407	233.209	255.525	488.734	427.471	455.45	882.921
3	1	0	3	30	244	639	[6,528,357,724]					260.08	231.73	256.143	487.873	419.503	453.429	872.932
3	1	0	3	31	413	584	[260,454,530,698]					234.668	256.29	257.035	513.325	462.708	457.675	920.383
3	1	0	3	32	922	614	[659,553,1031,699]					235.532	239.028	257.829	496.857	440.793	466.362	907.155
3	1	0	3	33	440	726	[84,638,540,923]					251.205	249.622	256.389	506.011	448.99	466.501	915.491
3	1	0	3	34	710	854	[524,648,970,1025]					246.664	251.085	262.21	513.295	456.919	469.457	926.376
3	1	0	4	1	1053	45	[1048,39,1059,50]					319.221	179.231	179.231	358.462	292.144	292.144	584.288
3	1	0	4	2	914	99	[870,47,973,157]					464.277	205.128	215.196	420.324	339.745	360.92	700.665
3	1	0	4	3	965	128	[942,106,1016,153]					323.2	199.309	199.171	398.48	327.067	337.657	664.724
3	1	0	4	4	1030	118	[1021,111,1038,132]					326.896	193.805	189.792	383.597	308.638	311.83	620.468
3	1	0	4	5	1010	187	[993,175,1024,198]					423.129	197.708	198.584	396.292	328.511	336.347	664.858
3	1	0	4	6	997	259	[976,239,1036,280]					413.693	201.614	201.228	402.842	352.933	383.436	736.369
3	1	0	4	7	61	383	[9,311,94,465]					535.705	202.648	210.42	413.068	404.517	438.768	843.285
3	1	0	4	8	943	406	[923,385,975,432]					497.352	219.152	228.481	447.633	401.422	420.833	822.255
3	1	0	4	9	988	457	[895,421,1038,511]					457.067	214.576	229.75	444.326	388.725	433.512	822.237
3	1	0	4	10	88	463	[52,417,145,500]					597.12	211.028	223.018	434.046	468.312	512.12	980.432
3	1	0	4	11	844	447	[632,386,934,510]					233.222	242.777	257.617	500.394	451.843	518.317	970.16
3	1	0	4	12	570	491	[562,477,580,500]					236.527	263.276	263.276	526.552	523.678	523.678	1047.36
3	1	0	4	13	49	506	[1,463,124,537]					459.489	205.879	216.899	422.778	426.584	430.036	856.62
3	1	0	4	14	583	572	[483,519,641,613]					238.859	261.306	268.329	529.635	583.322	962.964	1546.29
3	1	0	4	15	129	562	[91,531,194,589]					666.596	217.526	235.957	453.483	438.383	473.543	911.926
3	1	0	4	16	262	589	[127,526,389,668]					230.699	238.27	246.944	485.214	471.822	475.516	947.338
3	1	0	4	17	68	636	[39,600,97,676]					416.167	210.864	217.686	428.55	442.494	435.598	878.092
3	1	0	4	18	176	675	[86,576,265,749]					258.122	224.957	239.321	464.278	441.328	492.511	933.839
3	1	0	4	19	292	684	[215,638,331,729]					256.571	239.884	242.548	482.432	473.383	472.637	946.02
3	1	0	4	20	914	863	[865,830,967,908]					432.075	217.42	228.247	445.667	421.717	454.692	876.409
3	1	0	4	21	929	928	[816,860,981,994]					490.016	217.016	247.147	464.163	416.593	445.095	861.688
3	1	0	4	22	875	1026	[819,968,951,1078]					555.765	211.168	236.856	448.024	397.489	441.118	838.607
3	1	0	4	23	283	1024	[189,952,345,1078]					470.509	224.97	231.783	456.753	396.668	407.198	803.866
3	1	0	4	24	134	1017	[98,994,157,1045]					522.056	207.827	226.444	434.271	358.874	370.5	729.374
3	1	0	4	25	1028	1057	[1020,1049,1034,1063]					326.379	188.068	188.068	376.136	364.212	364.212	728.424
3	1	0	4	26	1045	1068	[1039,1058,1051,1073]					344.919	184.226	184.226	368.452	354.395	354.395	708.79
3	1	0	4	27	820	1065	[803,1051,851,1078]					570.963	213.286	230.202	443.488	372.276	365.908	738.184
3	1	0	4	28	56	567	[1,522,98,618]					254.479	204.704	211.074	415.778	418.439	429.564	848.003
3	1	0	4	29	478	212	[164,12,718,449]					236.554	244.079	256.058	500.137	451.938	474.048	925.986
3	1	0	4	30	699	332	[518,255,833,499]					240.566	255.245	259.713	514.958	469.801	525.738	995.539
3	1	0	4	31	470	465	[240,391,581,528]					236.904	253.7	258.349	512.049	494.934	509.66	1004.59
3	1	0	4	32	518	546	[259,479,666,590]					241.914	254.699	262.88	517.579	504.367	523.355	1027.72
3	1	0	4	33	725	532	[607,475,999,600]					232.419	241.634	257.378	499.012	457.154	493.631	950.785
3	1	0	4	34	736	738	[502,569,966,931]					232.236	250.55	260.528	511.078	488.797	546.528	1035.33
3	1	0	4	35	433	823	[159,537,651,1050]					244.046	252.763	260.45	513.213	504.056	546.333	1050.39
3	1	0	4	36	741	961	[632,920,842,1078]					246.479	235.254	239.437	474.691	422.259	422.203	844.462
3	1	0	4	37	747	1038	[671,994,852,1078]					289.148	225.272	242.177	467.449	387.431	446.148	833.579
3	1	0	5	1	204	48	[144,1,258,87]					223.505	203.513	214.963	418.476	348.397	359.355	707.752
3	1	0	5	2	267	88	[231,47,295,120]					219.99	216.836	215.866	432.702	450.64	676.371	1127.01
3	1	0	5	3	38	165	[34,160,46,171]					424.383	191.128	191.128	382.256	334.968	334.968	669.936
3	1	0	5	4	53	172	[33,163,72,200]					341.161	197.201	198.113	395.314	331.56	337.081	668.641
3	1	0	5	5	989	186	[953,163,1022,210]					353.829	201.463	207.191	408.654	336.571	355.693	692.264
3	1	0	5	6	130	200	[91,141,251,252]					424.7	210.44	231.986	442.426	384.649	426.393	811.042
3	1	0	5	7	148	395	[29,326,242,472]					491.872	216.684	225.851	442.535	404.669	426.17	830.839
3	1	0	5	8	949	566	[922,537,1038,593]					414.067	214.177	230.807	444.984	380.384	409.143	789.527
3	1	0	5	9	41	699	[1,650,105,752]					319.404	204.658	220.603	425.261	378.519	404.237	782.756
3	1	0	5	10	179	797	[34,747,258,861]					301.698	220.391	236.583	456.974	409.905	438.302	848.207
3	1	0	5	11	971	849	[933,814,1018,886]					326.53	204.08	213.23	417.31	352.015	371.38	723.395
3	1	0	5	12	1009	905	[997,887,1035,915]					290.472	195.555	194.774	390.329	323.702	324.604	648.306
3	1	0	5	13	552	909	[380,709,952,1078]					790.982	245.126	263.259	508.385	429.731	454.589	884.32
3	1	0	5	14	786	968	[730,882,865,1032]					598.611	232.777	250.103	482.88	388.758	425.383	814.141
3	1	0	5	15	735	931	[717,897,766,983]					412.587	246.191	247.603	493.794	417.539	410.612	828.151
3	1	0	5	16	253	1024	[153,948,293,1078]					242.384	218.702	228.098	446.8	397.083	452.732	849.815
3	1	0	5	17	359	1011	[267,948,431,1078]					448.722	232.341	247.843	480.184	443.868	482.704	926.572
3	1	0	5	18	892	1029	[841,997,932,1073]					256.562	207.715	222.438	430.153	335.824	362.343	698.167
3	1	0	5	19	804	1042	[748,994,888,1078]					448.982	217.411	229.357	446.768	351.975	375.264	727.239
3	1	0	5	20	424	1068	[413,1054,446,1078]					423.1	229.651	241.28	470.931	392.226	398.71	790.936
3	1	0	5	21	329	1065	[305,1043,348,1078]					518.009	225.465	238.491	463.956	383.474	395.882	779.356
3	1	0	5	22	704	1069	[676,1060,734,1078]					414.84	222.299	233.45	455.749	363.774	368.3	732.074
3	1	0	5	23	322	178	[49,1,465,363]					221.199	226.081	230.148	456.229	405.604	419.849	825.453
3	1	0	5	24	770	612	[530,419,1039,837]					334.576	241.506	254.591	496.097	430.325	450.803	881.128
3	1	0	6	1	904	15	[880,1,923,35]					504.897	210.079	218.357	428.436	806.117	846.325	1652.44
3	1	0	6	2	286	20	[218,1,332,44]					294.69	212.37	218.364	430.734	396.381	542.752	939.133
3	1	0	6	3	441	21	[331,1,463,42]					375.361	222.722	233.284	456.006	383.053	393.207	776.26
3	1	0	6	4	936	8	[924,1,949,15]					481.01	218.08	221.248	439.328	1627.13	1583.65	3210.78
3	1	0	6	5	985	14	[957,1,1010,28]					466.09	511.105	608.701	1119.81	15664.3	19903.8	35568.1
3	1	0	6	6	478	17	[384,1,500,64]					361.79	227.505	227.65	455.155	403.489	403.25	806.739
3	1	0	6	7	861	19	[839,1,886,42]					381.642	213.014	224.117	437.131	499.613	474.628	974.241
3	1	0	6	8	772	17	[754,1,842,34]					578.053	218.053	234.485	452.538	1459.6	473.591	1933.19
3	1	0	6	9	832	31	[814,17,855,48]					311.167	213.23	218.86	432.09	426.078	433.579	859.657
3	1	0	6	10	572	33	[520,1,647,75]					441	231.707	239.36	471.067	406.407	414.31	820.717
3	1	0	6	11	777	40	[765,28,799,57]					517.84	225.158	230.514	455.672	421.827	423.406	845.233
3	1	0	6	12	723	17	[695,1,746,85]					531.319	227.323	239.078	466.401	409.084	422.777	831.861
3	1	0	6	13	963	52	[939,32,979,73]					539.706	214.167	224.022	438.189	1084.78	1085.75	2170.53
3	1	0	6	14	893	47	[862,26,915,67]					449.951	209.813	220.236	430.049	674.618	675.675	1350.29
3	1	0	6	15	946	47	[935,39,954,58]					431.231	215.556	223.701	439.257	952.797	985.222	1938.02
3	1	0	6	16	988	51	[974,42,1003,72]					514.042	216.219	231.375	447.594	1507.84	1721.43	3229.27
3	1	0	6	17	931	48	[919,41,939,61]					466.26	211.863	221.135	432.998	880.489	914.356	1794.85
3	1	0	6	18	808	42	[776,29,823,69]					431.022	221.018	228.505	449.523	416.384	420.44	836.824
3	1	0	6	19	1013	59	[1001,49,1024,71]					564.267	257.037	287.455	544.492	2366.04	2969.03	5335.07
3	1	0	6	20	861	57	[848,42,889,75]					497.546	218.242	227.63	445.872	519.488	547.056	1066.54
3	1	0	6	21	975	79	[952,62,996,93]					469.149	213.906	227.869	441.775	1002.05	1066.86	2068.91
3	1	0	6	22	1025	84	[988,74,1040,105]					605.984	1309.18	902.527	2211.71	16843.6	9209.66	26053.3
3	1	0	6	23	888	93	[864,54,919,126]					458.412	215.33	229.87	445.2	587.817	548.971	1136.79
3	1	0	6	24	830	80	[793,39,897,126]					629.866	221.317	235.764	457.081	434.69	441.943	876.633
3	1	0	6	25	491	79	[430,1,570,147]					339.636	236.255	249.25	485.505	435.619	499.989	935.608
3	1	0	6	26	923	103	[904,60,958,131]					669.31	212.261	229.483	441.744	737.801	680.026	1417.83
3	1	0	6	27	999	128	[987,113,1014,141]					419.374	224.271	234.964	459.235	1047.8	1156.64	2204.44
3	1	0	6	28	64	118	[54,113,70,123]					291.165	192.282	192.282	384.564	314.583	314.583	629.166
3	1	0	6	29	599	108	[531,45,638,165]					366.48	240.717	249.559	490.276	458.724	473.277	932.001
3	1	0	6	30	1062	141	[1037,113,1078,165]					4482.9	1552.18	2431.37	3983.55	24319.9	27997.2	52317.1
3	1	0	6	31	665	95	[618,1,805,157]					429.146	234.084	251.458	485.542	434.826	471.26	906.086
3	1	0	6	32	857	135	[826,114,903,158]					441.554	221.612	225.641	447.253	429.484	433.815	863.299
3	1	0	6	33	958	134	[930,101,990,162]					462.957	209.453	223.235	432.688	721.876	656.346	1378.22
3	1	0	6	34	911	140	[890,126,937,164]					548.97	216.6	223.43	440.03	492.668	469.015	961.683
3	1	0	6	35	1001	152	[988,139,1014,169]					485.605	208.785	215.056	423.841	778.197	768.065	1546.26
3	1	0	6	36	705	152	[686,133,733,166]					307.989	242.203	247.843	490.046	476.797	474.022	950.819
3	1	0	6	37	889	171	[869,158,915,185]					509.084	221.829	233.874	455.703	427.95	433.526	861.476
3	1	0	6	38	1059	175	[1043,166,1072,185]					366.716	210.912	215.358	426.27	845.593	802.268	1647.86
3	1	0	6	39	938	171	[919,146,963,193]					452.511	215.535	232.511	448.046	454.084	429.085	883.169
3	1	0	6	40	782	156	[728,92,901,222]					510.629	232.678	254.129	486.807	464.694	513.879	978.573
3	1	0	6	41	907	196	[887,165,960,224]					409.969	216.718	230.354	447.072	415.351	431.26	846.611
3	1	0	6	42	1032	188	[1025,176,1041,201]					407.067	205.665	207.257	412.922	503.661	471.01	974.671
3	1	0	6	43	988	186	[958,155,1025,211]					345.099	211.48	210.397	421.877	509.683	428.907	938.59
3	1	0	6	44	877	205	[824,184,896,222]					539.82	228.232	242.665	470.897	460.152	469.503	929.655
3	1	0	6	45	1057	203	[1052,199,1066,211]					454.148	191.555	191.555	383.11	407.328	407.328	814.656
3	1	0	6	46	717	195	[684,154,879,253]					403.798	239.977	248.854	488.831	507.238	532.713	1039.95
3	1	0	6	47	971	217	[953,194,1000,243]					450.679	209.817	220.148	429.965	393.801	400.037	793.838
3	1	0	6	48	1057	238	[1047,229,1068,250]					320.006	195.621	193.401	389.022	353.23	356.446	709.676
3	1	0	6	49	1031	236	[1014,221,1047,246]					347.774	204.086	208.555	412.641	367.441	365.652	733.093
3	1	0	6	50	716	260	[630,141,767,308]					566.608	250.77	256.233	507.003	953.714	687.75	1641.46
3	1	0	6	51	795	258	[769,236,857,276]					432.758	240.182	254.232	494.414	533.568	658.716	1192.28
3	1	0	6	52	771	277	[746,242,878,304]					482.323	240.598	256.863	497.461	521.278	585.236	1106.51
3	1	0	6	53	1002	256	[973,222,1018,279]					407.202	208.259	214.047	422.306	378.147	381.403	759.55
3	1	0	6	54	955	251	[901,209,979,290]					500.324	216.791	230.287	447.078	415.824	428.397	844.221
3	1	0	6	55	887	268	[865,214,967,310]					562.17	222.908	235.41	458.318	422.543	428.03	850.573
3	1	0	6	56	1033	261	[1006,247,1043,307]					534.543	207.283	222.507	429.79	368.045	379.486	747.531
3	1	0	6	57	1069	280	[1058,274,1075,291]					359.314	196.575	194.124	390.699	349.884	353.571	703.455
3	1	0	6	58	983	291	[965,266,1012,307]					396.533	212.279	218.011	430.29	383.765	386.272	770.037
3	1	0	6	59	1033	313	[1024,300,1045,321]					349.685	205.452	206.742	412.194	351.541	356	707.541
3	1	0	6	60	1074	320	[1070,312,1078,326]					287.574	194.667	194.667	389.334	339.731	339.731	679.462
3	1	0	6	61	846	308	[802,280,890,340]					551.062	235.921	248.361	484.282	584.033	484.959	1068.99
3	1	0	6	62	1031	332	[1014,319,1047,354]					374.061	205.832	212.939	418.771	351.148	357.983	709.131
3	1	0	6	63	890	352	[814,296,993,394]					475.711	229.454	252.993	482.447	447.358	465.978	913.336
3	1	0	6	64	946	356	[905,329,1021,384]					429.13	217.173	237.461	454.634	399.697	427.496	827.193
3	1	0	6	65	949	396	[896,375,1012,416]					445.348	218.46	233.236	451.696	405.397	433.517	838.914
3	1	0	6	66	301	415	[134,360,387,465]					357.912	242.56	253.011	495.571	1193.29	6028.41	7221.7
3	1	0	6	67	1069	415	[1059,408,1075,436]					685.545	202.261	203.284	405.545	339.89	341.303	681.193
3	1	0	6	68	415	515	[209,360,538,633]					494.727	254.408	269.747	524.155	773.131	1066.11	1839.24
3	1	0	6	69	805	429	[645,340,970,540]					451.783	242.634	259.522	502.156	587.487	990.033	1577.52
3	1	0	6	70	1019	490	[997,468,1038,520]					372.309	205.102	207.685	412.787	377.641	379.333	756.974
3	1	0	6	71	1037	505	[1025,491,1050,520]					440.311	207.589	210.533	418.122	366.441	367.17	733.611
3	1	0	6	72	727	561	[539,471,986,660]					393.474	248.95	265.02	513.97	700.611	517.257	1217.87
3	1	0	6	73	1049	532	[1042,522,1059,540]					289.892	201.105	199.624	400.729	369.31	375.806	745.116
3	1	0	6	74	784	775	[597,630,946,933]					403.75	248.995	260.88	509.875	583.811	494.056	1077.87
3	1	0	6	75	503	711	[244,608,628,834]					363.98	258.279	263.05	521.329	548.628	486.129	1034.76
3	1	0	6	76	65	813	[28,793,95,843]					358.768	209.484	211.834	421.318	364.402	373.508	737.91
3	1	0	6	77	420	864	[340,799,658,968]					451.543	258.075	269.174	527.249	708.353	480.446	1188.8
3	1	0	6	78	258	925	[69,781,389,1073]					353.248	231.67	254.124	485.794	402.81	449.448	852.258
3	1	0	6	79	574	968	[383,847,820,1078]					420.581	244.357	265.297	509.654	421.95	463.649	885.599
3	1	0	6	80	552	301	[288,136,781,612]					317.449	257.134	264.327	521.461	796.341	2776.57	3572.91
3	1	0	6	81	999	440	[974,396,1029,471]					477.126	210.45	223.015	433.465	380.735	390.933	771.668
3	1	0	6	82	1035	40	[988,1,1078,96]					1368.24	621.928	736.989	1358.92	9120.51	13696.6	22817.1
3	1	0	6	83	1041	111	[1010,91,1067,133]					5435	1957.19	2410.36	4367.55	27727.5	39522.9	67250.4
3	1	0	7	1	94	42	[81,24,111,55]					392.455	187.736	185.624	373.36	304.085	297.168	601.253
3	1	0	7	2	684	106	[491,1,949,294]					419.766	228.828	234.363	463.191	518.363	403.452	921.815
3	1	0	7	3	499	81	[440,1,563,253]					639.008	238.01	242.271	480.281	422.322	436.372	858.694
3	1	0	7	4	954	131	[895,47,1042,190]					338.149	198.013	208.702	406.715	380.995	367.544	748.539
3	1	0	7	5	141	164	[106,134,184,191]					564.63	202.946	222.622	425.568	361.358	395	756.358
3	1	0	7	6	329	125	[74,1,494,344]					393.06	222.473	228.369	450.842	395.289	462.327	857.616
3	1	0	7	7	257	188	[249,181,266,199]					393.913	230.989	233.404	464.393	429.323	432.346	861.669
3	1	0	7	8	244	207	[230,194,263,221]					757.42	230.556	242.017	472.573	457.758	573.479	1031.24
3	1	0	7	9	871	246	[666,47,1059,391]					490.664	223.975	241.164	465.139	535.072	5792.07	6327.14
3	1	0	7	10	92	190	[29,136,193,261]					391.175	202.423	216.505	418.928	360.864	412.509	773.373
3	1	0	7	11	228	236	[183,205,284,271]					518.608	224.665	236.483	461.148	416.04	435.375	851.415
3	1	0	7	12	719	261	[612,222,752,338]					630.835	250.375	256.413	506.788	448.851	453.11	901.961
3	1	0	7	13	413	322	[336,250,519,362]					442.253	246.783	246.465	493.248	455.061	445.394	900.455
3	1	0	7	14	72	246	[32,211,115,285]					508.083	196.699	210.174	406.873	350.611	380.495	731.106
3	1	0	7	15	79	293	[12,272,107,313]					254.649	195.479	205.745	401.224	354.49	373.777	728.267
3	1	0	7	16	168	336	[15,235,355,435]					522.889	219.183	241.575	460.758	413.658	434.412	848.07
3	1	0	7	17	1054	370	[1034,362,1061,386]					370.143	188.095	186.315	374.41	335.359	341.109	676.468
3	1	0	7	18	378	420	[237,335,503,490]					410.363	244.617	241.51	486.127	455.796	449.99	905.786
3	1	0	7	19	688	393	[639,370,746,418]					794.883	253.959	268.581	522.54	455.787	465.045	920.832
3	1	0	7	20	53	402	[7,344,159,450]					520.129	202.157	221.476	423.633	392.345	404.701	797.046
3	1	0	7	21	404	499	[359,459,481,528]					268.969	251.192	247.245	498.437	468.329	458.122	926.451
3	1	0	7	22	241	496	[1,395,467,635]					453.233	228.262	234.633	462.895	429.635	456.4	886.035
3	1	0	7	23	40	515	[1,457,108,558]					490.298	201.481	236.064	437.545	374.771	446.032	820.803
3	1	0	7	24	865	523	[659,355,1077,690]					494.273	229.824	234.764	464.588	428.887	428.655	857.542
3	1	0	7	25	1030	631	[1004,602,1068,681]					273.896	198.57	212.594	411.164	347.124	365.24	712.364
3	1	0	7	26	972	641	[916,580,1028,714]					456.694	211.057	218.506	429.563	376.943	388.944	765.887
3	1	0	7	27	225	722	[1,566,404,863]					542.219	224.152	224.881	449.033	418.61	406.931	825.541
3	1	0	7	28	745	686	[694,654,892,733]					685.421	243.449	245.504	488.953	440.751	444.446	885.197
3	1	0	7	29	850	754	[701,721,890,796]					591.828	241.59	245.069	486.659	432.813	427.336	860.149
3	1	0	7	30	1061	781	[1044,766,1071,803]					318.211	188.039	186.816	374.855	321.632	324.168	645.8
3	1	0	7	31	977	769	[878,669,1063,831]					543.316	208.188	217.944	426.132	368.761	388.226	756.987
3	1	0	7	32	129	876	[1,712,265,1057]					512.747	209.164	224.789	433.953	366.287	372.274	738.561
3	1	0	7	33	797	808	[704,753,861,859]					436.056	243.906	245.796	489.702	433.181	414.958	848.139
3	1	0	7	34	885	808	[848,771,964,847]					465.302	223.559	224.921	448.48	393.753	389.889	783.642
3	1	0	7	35	1019	852	[975,823,1053,882]					330.056	195.381	202.157	397.538	332.418	351.944	684.362
3	1	0	7	36	945	895	[790,823,1023,991]					540.805	212.671	230.364	443.035	366.646	393.787	760.433
3	1	0	7	37	829	935	[679,800,1004,1044]					541.185	225.764	236.489	462.253	387.376	393.696	781.072
3	1	0	7	38	662	980	[453,878,936,1078]					585.475	233.873	246.209	480.082	419.746	397.079	816.825
3	1	0	7	39	853	1054	[821,1038,878,1072]					506.449	209.257	219.875	429.132	349.46	359.603	709.063
3	1	0	7	40	933	1060	[839,1042,977,1078]					550.682	198.68	217.936	416.616	318.473	343.873	662.346
3	1	0	7	41	682	831	[600,715,736,886]					279.503	253.415	257.205	510.62	459.231	473.788	933.019
3	1	0	7	42	660	452	[598,421,695,506]					332.877	255.084	257.404	512.488	473.852	468.834	942.686
3	1	0	7	43	689	619	[663,591,716,688]					427.315	254.19	265.436	519.626	461.475	463.664	925.139
3	1	0	8	1	258	8	[245,1,277,16]					464.952	207.489	214.4	421.889	356.469	358.171	714.64
3	1	0	8	2	804	28	[772,1,835,65]					344.236	210.384	215.567	425.951	351.581	356.573	708.154
3	1	0	8	3	671	27	[624,1,730,60]					336.406	221.153	222.991	444.144	374.202	371.84	746.042
3	1	0	8	4	465	17	[429,1,499,35]					475.156	220.772	229.922	450.694	388.221	414.311	802.532
3	1	0	8	5	287	26	[219,1,337,61]					656.789	211.374	222.511	433.885	375.688	383.667	759.355
3	1	0	8	6	97	60	[86,56,107,72]					336.556	193.405	191.617	385.022	357.556	359.293	716.849
3	1	0	8	7	304	66	[283,50,320,87]					633.008	223.18	243.128	466.308	400.148	407.936	808.084
3	1	0	8	8	264	70	[233,41,292,94]					642.764	215.824	229.382	445.206	399.364	401.831	801.195
3	1	0	8	9	1048	76	[1044,69,1054,86]					292.59	180.043	180.043	360.086	290.692	290.692	581.384
3	1	0	8	10	342	50	[296,1,393,88]					822.136	222.362	256.305	478.667	411.805	477.831	889.636
3	1	0	8	11	409	54	[353,1,444,139]					647.457	228.899	257.921	486.82	424.165	450.693	874.858
3	1	0	8	12	203	93	[130,11,251,135]					872.346	206.359	241.454	447.813	384.663	396.054	780.717
3	1	0	8	13	732	62	[629,1,779,136]					403.101	226.542	236.618	463.16	389.423	406.236	795.659
3	1	0	8	14	348	101	[280,67,366,132]					465.433	224.873	234.856	459.729	424.398	439.678	864.076
3	1	0	8	15	250	104	[228,81,274,143]					759.517	222.318	245.315	467.633	415.702	433.155	848.857
3	1	0	8	16	479	81	[404,1,541,142]					996.347	231.764	266.259	498.023	423.37	478.124	901.494
3	1	0	8	17	1017	120	[1007,111,1027,128]					424.89	195.849	195.25	391.099	314.527	317.03	631.557
3	1	0	8	18	710	132	[690,100,764,166]					509.77	237.57	254.656	492.226	435.801	439.041	874.842
3	1	0	8	19	799	93	[726,33,876,151]					544.734	222.014	248.723	470.737	388.545	441.862	830.407
3	1	0	8	20	575	92	[518,1,644,159]					527.346	232.694	245.43	478.124	419.45	457.29	876.74
3	1	0	8	21	873	111	[792,54,919,171]					518.702	215.422	236.573	451.995	373.888	426.058	799.946
3	1	0	8	22	35	156	[24,139,53,163]					416.801	202.238	194.318	396.556	380.006	375.066	755.072
3	1	0	8	23	93	152	[73,136,113,185]					383.295	201.312	197.063	398.375	387.367	372.263	759.63
3	1	0	8	24	250	175	[207,126,270,207]					800.5	224.542	249.482	474.024	466.833	504.681	971.514
3	1	0	8	25	313	138	[259,81,381,188]					677.812	228.697	254.659	483.356	454.123	486.254	940.377
3	1	0	8	26	198	151	[143,126,235,205]					666.641	216.783	245.039	461.822	500.135	605.431	1105.57
3	1	0	8	27	286	180	[252,135,320,209]					861.599	232.043	264.775	496.818	459.655	493.429	953.084
3	1	0	8	28	946	165	[920,128,979,213]					461.296	205.877	220.574	426.451	352.062	379.769	731.831
3	1	0	8	29	427	170	[369,110,487,233]					790.944	240.214	266.067	506.281	458.524	452.967	911.491
3	1	0	8	30	704	181	[671,135,769,219]					621.101	241.783	259.367	501.15	451.188	455.22	906.408
3	1	0	8	31	157	166	[128,140,187,219]					735.935	213.458	247.561	461.019	565.366	567.449	1132.82
3	1	0	8	32	851	183	[812,139,904,220]					617.408	222.66	242.643	465.303	428.961	598.873	1027.83
3	1	0	8	33	12	198	[5,190,20,205]					478.058	194.988	194.453	389.441	373.286	373.766	747.052
3	1	0	8	34	129	182	[99,140,156,220]					736.917	210.772	236.463	447.235	536.102	671.833	1207.93
3	1	0	8	35	194	212	[166,192,213,227]					636.705	219.883	234.558	454.441	898.903	651.495	1550.4
3	1	0	8	36	906	188	[886,124,943,243]					474.964	213.066	222.772	435.838	370.701	378.424	749.125
3	1	0	8	37	336	195	[318,181,374,222]					642.767	238.169	254.043	492.212	468.24	473.259	941.499
3	1	0	8	38	633	175	[567,106,681,234]					504.445	244.872	266.202	511.074	454.827	484.118	938.945
3	1	0	8	39	955	216	[937,197,1005,239]					462.874	204.877	209.389	414.266	357.181	364.126	721.307
3	1	0	8	40	98	181	[81,164,128,238]					535.051	202.715	214.444	417.159	438.867	448.256	887.123
3	1	0	8	41	309	203	[293,192,323,223]					781.416	238.107	262.416	500.523	456.694	481.281	937.975
3	1	0	8	42	70	215	[62,196,90,228]					733.014	204.845	214.599	419.444	399.423	400.034	799.457
3	1	0	8	43	336	228	[307,205,361,253]					818.56	240.855	265.711	506.566	465.135	477.226	942.361
3	1	0	8	44	172	231	[149,210,188,248]					610.421	215.106	229.093	444.199	684.26	561.785	1246.05
3	1	0	8	45	561	213	[499,114,618,253]					876.394	248.249	281.021	529.27	465.898	502.777	968.675
3	1	0	8	46	141	249	[106,206,164,279]					695.278	211.263	240.438	451.701	517.827	526.296	1044.12
3	1	0	8	47	232	221	[184,192,265,247]					1018.88	228.987	271.144	500.131	627.064	577.043	1204.11
3	1	0	8	48	289	229	[254,199,318,250]					691.894	234.066	254.085	488.151	494.241	504.149	998.39
3	1	0	8	49	379	240	[340,209,421,273]					1154.36	248.302	281.014	529.316	474.692	502.041	976.733
3	1	0	8	50	224	251	[209,236,255,261]					1138.28	240.554	274.747	515.301	614.471	601.102	1215.57
3	1	0	8	51	296	258	[258,227,315,283]					755.131	236.05	252.485	488.535	523.659	542.046	1065.7
3	1	0	8	52	194	257	[157,240,216,284]					895.154	221.287	246.711	467.998	564.179	602.899	1167.08
3	1	0	8	53	619	253	[578,226,664,291]					647.298	255.369	275.965	531.334	475.446	479.807	955.253
3	1	0	8	54	690	242	[653,208,739,302]					1136.49	252.134	291.153	543.287	464.122	474.55	938.672
3	1	0	8	55	745	264	[737,256,790,273]					596.966	249.842	271.534	521.376	451.086	453.966	905.052
3	1	0	8	56	247	271	[212,247,269,286]					1113.39	237.053	274.22	511.273	557.083	575.114	1132.2
3	1	0	8	57	348	275	[317,246,385,293]					697.136	243.827	254.591	498.418	489.21	533.509	1022.72
3	1	0	8	58	459	249	[416,170,498,299]					752.702	248	269.058	517.058	469.618	492.895	962.513
3	1	0	8	59	516	240	[479,136,548,294]					875.693	249.765	274.614	524.379	469.901	492.288	962.189
3	1	0	8	60	919	254	[818,221,978,292]					541.125	222.466	241.818	464.284	397.659	426.909	824.568
3	1	0	8	61	181	280	[137,262,199,304]					819.76	219.609	240.587	460.196	525.242	551.86	1077.1
3	1	0	8	62	740	281	[729,265,757,299]					821.581	259.401	280.027	539.428	453.377	460.554	913.931
3	1	0	8	63	317	274	[304,256,327,288]					780.319	242.552	256.908	499.46	499.939	499	998.939
3	1	0	8	64	780	217	[717,127,910,295]					888.415	235.755	274.649	510.404	434.96	471.245	906.205
3	1	0	8	65	89	282	[70,269,99,296]					685.102	205.475	215.765	421.24	449.872	473.745	923.617
3	1	0	8	66	112	283	[81,258,135,310]					525.632	208.888	227.31	436.198	477.246	478.884	956.13
3	1	0	8	67	564	280	[501,245,597,313]					1104.77	258.969	290.058	549.027	480.657	503.964	984.621
3	1	0	8	68	321	295	[303,270,333,335]					698.992	245.695	257.285	502.98	489.535	496.024	985.559
3	1	0	8	69	417	270	[349,247,439,323]					1294.86	254.221	302.947	557.168	481.045	494.299	975.344
3	1	0	8	70	77	307	[48,283,94,342]					701.864	205.954	226.61	432.564	424.994	444.297	869.291
3	1	0	8	71	259	308	[202,267,308,348]					1082.73	235.747	266.492	502.239	500.21	523.14	1023.35
3	1	0	8	72	637	303	[593,255,707,339]					919.34	260.773	286.459	547.232	471.436	475.957	947.393
3	1	0	8	73	301	307	[285,283,316,323]					1088.19	245.643	278.242	523.885	489.514	498.798	988.312
3	1	0	8	74	518	330	[478,284,546,363]					908.345	262.353	294.553	556.906	483.703	492.066	975.769
3	1	0	8	75	559	349	[530,299,608,378]					767.448	262.542	282.478	545.02	482.964	490.418	973.382
3	1	0	8	76	200	305	[176,283,220,324]					911.408	232.635	277.146	509.781	514.898	555.346	1070.24
3	1	0	8	77	698	314	[679,296,718,340]					866.43	263.533	293.066	556.599	459.367	465.94	925.307
3	1	0	8	78	816	317	[783,273,850,340]					632.463	239.047	244.154	483.201	429.734	430.574	860.308
3	1	0	8	79	39	325	[21,304,67,352]					726.581	207.145	229.911	437.056	404.38	386.968	791.348
3	1	0	8	80	348	308	[331,290,367,327]					963.095	254.016	279.673	533.689	483.694	498.667	982.361
3	1	0	8	81	427	309	[396,280,451,335]					1264.95	256.66	302.217	558.877	475.016	484.696	959.712
3	1	0	8	82	112	311	[88,297,138,341]					849.217	214.773	242.942	457.715	459.809	479.467	939.276
3	1	0	8	83	757	321	[710,268,804,363]					579.811	250.184	274.777	524.961	445.108	460.446	905.554
3	1	0	8	84	467	310	[437,278,495,328]					1159.7	256.934	278.363	535.297	484.216	508.301	992.517
3	1	0	8	85	139	322	[82,303,160,358]					867.26	219.175	245.772	464.947	460.144	458.884	919.028
3	1	0	8	86	467	344	[436,313,496,377]					1047.39	261.671	296.386	558.057	490.091	495.401	985.492
3	1	0	8	87	150	299	[130,284,190,344]					694.544	221.373	257.505	478.878	514.723	508.961	1023.68
3	1	0	8	88	369	326	[341,306,387,349]					937.822	254.846	272.862	527.708	485.103	496.195	981.298
3	1	0	8	89	205	337	[177,314,243,368]					921.449	234.513	252.724	487.237	473.12	468.523	941.643
3	1	0	8	90	331	333	[316,314,346,353]					915.657	250.304	270.436	520.74	485.125	494.736	979.861
3	1	0	8	91	957	324	[887,269,1031,398]					514.358	216.269	245.566	461.835	394.211	412.679	806.89
3	1	0	8	92	403	342	[338,315,441,385]					1271.17	256.227	290.711	546.938	488.043	520.08	1008.12
3	1	0	8	93	648	351	[615,332,679,374]					805.516	266.152	281.107	547.259	468.523	472.279	940.802
3	1	0	8	94	161	352	[143,328,202,373]					666.784	224.667	234.928	459.595	471.384	487.8	959.184
3	1	0	8	95	710	361	[669,331,766,393]					889.43	261.892	287.737	549.629	472.567	474.053	946.62
3	1	0	8	96	130	361	[99,343,146,378]					1293.14	222.748	262.444	485.192	442.004	456.319	898.323
3	1	0	8	97	427	365	[403,351,446,379]					1072.46	263.523	299.441	562.964	495.257	511.975	1007.23
3	1	0	8	98	292	365	[245,315,332,402]					1333.32	245.325	285.352	530.677	483.127	500.928	984.055
3	1	0	8	99	236	364	[199,331,267,400]					1009.87	237.297	269.962	507.259	473.272	494.324	967.596
3	1	0	8	100	194	372	[179,358,208,384]					803.777	235.442	249.089	484.531	465.592	474.508	940.1
3	1	0	8	101	347	376	[317,350,386,401]					902.804	248.851	278.116	526.967	485.446	500.982	986.428
3	1	0	8	102	497	390	[456,350,561,420]					905.825	258.911	286.167	545.078	496.782	507.272	1004.05
3	1	0	8	103	605	365	[580,322,634,413]					1029.32	265.76	299.098	564.858	481.974	505.215	987.189
3	1	0	8	104	23	381	[1,356,45,399]					564.684	203.049	214.684	417.733	384.963	398.968	783.931
3	1	0	8	105	188	395	[163,371,206,418]					862.766	233.08	252.926	486.006	453.13	479.426	932.556
3	1	0	8	106	965	392	[936,370,1016,435]					664.31	216.718	229.513	446.231	453.738	431.15	884.888
3	1	0	8	107	152	390	[109,369,178,413]					854.263	222.366	253.289	475.655	457.358	495.939	953.297
3	1	0	8	108	799	390	[734,328,908,446]					667.507	242.338	266.176	508.514	436.019	467.243	903.262
3	1	0	8	109	400	387	[369,370,449,414]					752.103	256.253	274.904	531.157	490.561	494.767	985.328
3	1	0	8	110	655	395	[627,366,708,421]					835.824	262.94	290.58	553.52	470.055	473.855	943.91
3	1	0	8	111	86	379	[68,363,100,407]					977.405	213.588	243.315	456.903	434.619	466.071	900.69
3	1	0	8	112	337	401	[319,389,352,426]					1109.6	256.965	276.863	533.828	480.098	482.322	962.42
3	1	0	8	113	431	402	[411,369,462,415]					877.258	259.234	277.309	536.543	488.952	487.567	976.519
3	1	0	8	114	606	410	[576,374,652,433]					740.505	267.271	287.981	555.252	492.348	506.077	998.425
3	1	0	8	115	102	408	[67,373,117,436]					1077.96	219.77	250.161	469.931	445.983	464.653	910.636
3	1	0	8	116	287	409	[262,392,309,427]					1048.92	244.165	263.657	507.822	485.918	501.394	987.312
3	1	0	8	117	48	430	[21,350,77,457]					772.055	210.226	232.104	442.33	421.537	427.53	849.067
3	1	0	8	118	1002	425	[979,392,1048,465]					636.299	209.648	232.763	442.411	430.226	497.486	927.712
3	1	0	8	119	223	419	[188,387,249,440]					1138.07	240.184	276.667	516.851	472.821	487.828	960.649
3	1	0	8	120	408	424	[379,402,451,448]					868.974	258.825	280.079	538.904	479.772	499.43	979.202
3	1	0	8	121	697	438	[661,390,785,476]					880.285	256.755	280.232	536.987	466.384	484.498	950.882
3	1	0	8	122	155	423	[139,408,178,444]					746.011	226.875	251.363	478.238	444.225	465.725	909.95
3	1	0	8	123	188	425	[163,412,218,467]					1047.44	235.384	273.259	508.643	449.106	467.506	916.612
3	1	0	8	124	360	433	[332,391,385,461]					1376.54	256.92	293.553	550.473	492.145	511.888	1004.03
3	1	0	8	125	13	424	[1,409,27,438]					630.617	208.959	220.851	429.81	393.848	399.87	793.718
3	1	0	8	126	522	416	[467,401,550,443]					941.091	262.674	294.03	556.704	497.502	507.828	1005.33
3	1	0	8	127	604	435	[589,421,626,449]					785.808	273.511	292.494	566.005	500.316	512.25	1012.57
3	1	0	8	128	260	433	[230,396,286,473]					1207.68	243.33	281.319	524.649	479.483	489.616	969.099
3	1	0	8	129	312	430	[281,396,345,458]					802.844	248.148	268.504	516.652	492.093	505.752	997.845
3	1	0	8	130	535	438	[517,423,552,467]					874	265.264	284.699	549.963	500.164	510.925	1011.09
3	1	0	8	131	445	451	[417,399,473,471]					1087.94	261.919	287.776	549.695	487.832	508.217	996.049
3	1	0	8	132	13	452	[1,433,44,484]					647.5	205.159	223.962	429.121	401.717	398.764	800.481
3	1	0	8	133	99	449	[79,438,111,474]					659.918	222.155	239.015	461.17	464.032	476.791	940.823
3	1	0	8	134	567	453	[535,373,622,500]					974.073	266.332	300.62	566.952	502.385	522.073	1024.46
3	1	0	8	135	634	455	[603,420,670,502]					1285.97	269.947	311.545	581.492	496.545	522.232	1018.78
3	1	0	8	136	72	455	[59,426,95,476]					1020.73	222.482	246.368	468.85	445.328	471.355	916.683
3	1	0	8	137	206	454	[188,438,232,476]					999.413	238.635	272.913	511.548	456.114	482.423	938.537
3	1	0	8	138	124	431	[89,407,177,480]					1251.03	223.879	270.658	494.537	453.681	479.184	932.865
3	1	0	8	139	918	435	[778,387,995,484]					1190.29	232.178	277.589	509.767	428.342	464.638	892.98
3	1	0	8	140	291	462	[263,440,358,482]					977.166	250.149	283.87	534.019	497.675	514.891	1012.57
3	1	0	8	141	239	462	[209,434,251,493]					875.922	250.402	277.922	528.324	539.239	579.32	1118.56
3	1	0	8	142	505	460	[482,440,535,485]					1103.42	262.65	284.018	546.668	503.314	504.407	1007.72
3	1	0	8	143	401	461	[362,440,437,486]					908.955	255.9	279.881	535.781	486.802	504.366	991.168
3	1	0	8	144	838	475	[822,457,895,495]					793.024	241.494	271.072	512.566	435.836	454.198	890.034
3	1	0	8	145	666	476	[643,451,702,499]					1063.9	262.611	287.615	550.226	475.675	482.104	957.779
3	1	0	8	146	739	463	[706,438,784,513]					720.16	255.319	271.457	526.776	464.044	483.34	947.384
3	1	0	8	147	963	473	[947,456,977,490]					745.343	218.691	228.931	447.622	420.509	424.48	844.989
3	1	0	8	148	124	474	[87,460,142,489]					1186.73	233.407	255.955	489.362	481.503	504.884	986.387
3	1	0	8	149	148	484	[115,461,160,506]					1076.61	229.16	261.905	491.065	467.784	473.326	941.11
3	1	0	8	150	404	496	[373,468,438,518]					908.227	259.886	283.674	543.56	498.279	513.37	1011.65
3	1	0	8	151	316	485	[288,468,333,504]					1006.53	251.446	280.638	532.084	498.79	513.594	1012.38
3	1	0	8	152	185	496	[143,458,222,551]					914.686	233.941	288.188	522.129	501.712	858.616	1360.33
3	1	0	8	153	239	483	[225,469,259,500]					940.583	263.49	280.5	543.99	649.802	708.833	1358.63
3	1	0	8	154	78	479	[69,468,94,507]					926.081	226.032	246.398	472.43	471.501	482.374	953.875
3	1	0	8	155	478	476	[432,417,498,523]					835.776	263.656	285.441	549.097	496.993	497.329	994.322
3	1	0	8	156	361	485	[345,456,386,500]					970.602	253.576	274.111	527.687	488.409	487.139	975.548
3	1	0	8	157	51	496	[1,456,81,528]					971.059	211.946	251.656	463.602	443.98	484.79	928.77
3	1	0	8	158	752	494	[737,477,765,519]					886.492	260.422	277.916	538.338	468.003	483.101	951.104
3	1	0	8	159	277	499	[258,470,312,521]					777.212	251.311	279.568	530.879	530.163	743.658	1273.82
3	1	0	8	160	448	481	[429,466,462,503]					1290.56	272.777	311.833	584.61	503.787	503.765	1007.55
3	1	0	8	161	538	487	[517,466,561,512]					801.79	263.877	279.395	543.272	504.227	504.766	1008.99
3	1	0	8	162	106	500	[61,486,123,548]					969.389	226.874	253.699	480.573	507.219	527.327	1034.55
3	1	0	8	163	230	501	[219,491,242,517]					942.578	253.457	277.379	530.836	542.604	519.526	1062.13
3	1	0	8	164	988	497	[917,462,1043,527]					714.158	216.857	248.441	465.298	398.611	435.467	834.078
3	1	0	8	165	890	495	[862,465,923,537]					588.55	231.53	253.275	484.805	428.114	435.365	863.479
3	1	0	8	166	816	496	[798,471,838,523]					572.856	247.208	266.133	513.341	448.434	454.789	903.223
3	1	0	8	167	620	507	[568,488,643,529]					547.626	268.73	274.768	543.498	624.249	575.576	1199.83
3	1	0	8	168	397	525	[364,499,413,541]					1216.9	261.57	291.158	552.728	496.885	517.452	1014.34
3	1	0	8	169	124	526	[89,500,158,557]					912.384	225.787	245.215	471.002	511.632	523.893	1035.53
3	1	0	8	170	781	508	[724,468,811,548]					883.025	252.298	282.006	534.304	455.89	468.46	924.35
3	1	0	8	171	252	521	[196,481,282,551]					1016.83	250.217	339.496	589.713	544.112	1242.3	1786.41
3	1	0	8	172	1001	535	[915,501,1044,574]					659.133	215.131	239.35	454.481	387.392	423.154	810.546
3	1	0	8	173	353	510	[309,475,369,527]					1063.98	255.736	286.287	542.023	495.507	525.32	1020.83
3	1	0	8	174	504	502	[476,474,531,569]					1161.15	261.659	293.463	555.122	502.849	525.069	1027.92
3	1	0	8	175	852	501	[803,484,870,536]					666.632	246.026	271.392	517.418	510.381	724.2	1234.58
3	1	0	8	176	686	526	[633,466,733,582]					975.629	261.695	296.443	558.138	477.908	499.036	976.944
3	1	0	8	177	473	543	[428,508,492,574]					895.268	260.557	294.89	555.447	502.293	503.031	1005.32
3	1	0	8	178	585	546	[525,495,635,602]					696.696	266.098	285.026	551.124	516.852	516.511	1033.36
3	1	0	8	179	346	537	[331,516,376,554]					1037.84	259.686	284.171	543.857	605.569	498.891	1104.46
3	1	0	8	180	292	531	[276,514,325,552]					992.054	255.719	281.369	537.088	470.657	476.306	946.963
3	1	0	8	181	426	536	[403,493,466,579]					948.183	260.215	302.824	563.039	493.694	504.569	998.263
3	1	0	8	182	16	526	[1,502,50,550]					1046.17	215.837	242.641	458.478	453.864	497.52	951.384
3	1	0	8	183	381	544	[359,523,405,562]					1150.65	260.228	296.379	556.607	527.167	564.357	1091.52
3	1	0	8	184	269	546	[256,534,290,559]					657.677	260.355	270.903	531.258	483.706	485.441	969.147
3	1	0	8	185	320	541	[300,513,338,561]					1185.03	258.236	289.558	547.794	475.367	488.13	963.497
3	1	0	8	186	50	534	[18,521,70,572]					902.874	214.238	238.117	452.355	501.446	541.01	1042.46
3	1	0	8	187	536	543	[519,521,567,560]					706.172	266.795	301.192	567.987	523.4	656.515	1179.91
3	1	0	8	188	194	557	[168,534,229,579]					986.441	246.35	295.748	542.098	504.272	501.112	1005.38
3	1	0	8	189	762	559	[709,532,802,584]					819.621	253.916	287.642	541.558	459.077	471.253	930.33
3	1	0	8	190	86	553	[68,540,120,573]					856.161	236.777	263.811	500.588	1144.74	2050.22	3194.96
3	1	0	8	191	239	556	[220,540,264,575]					1172.1	246.404	271.711	518.115	476.763	480.967	957.73
3	1	0	8	192	55	557	[39,545,67,567]					751.242	219.719	233.82	453.539	635.94	688.961	1324.9
3	1	0	8	193	523	578	[488,554,563,603]					1345.82	264.562	294.498	559.06	502.73	502.468	1005.2
3	1	0	8	194	646	586	[581,535,699,639]					1008.94	264.446	301.724	566.17	496.861	561.346	1058.21
3	1	0	8	195	11	569	[1,542,23,584]					1015.99	220.279	257.85	478.129	558.307	783.815	1342.12
3	1	0	8	196	413	563	[352,547,431,599]					1042.57	256.902	288.272	545.174	590.75	1669.8	2260.55
3	1	0	8	197	324	577	[306,550,359,601]					1050.13	250.607	282.215	532.822	484.679	494.903	979.582
3	1	0	8	198	293	572	[265,545,309,601]					1196.02	250.042	278.158	528.2	492.472	490.877	983.349
3	1	0	8	199	932	572	[892,540,1006,608]					569.694	219.519	237.405	456.924	402.029	417.431	819.46
3	1	0	8	200	248	581	[222,563,277,599]					1000.5	245.816	277.282	523.098	481.372	495.985	977.357
3	1	0	8	201	858	559	[768,516,926,606]					718.589	238.539	264.842	503.381	435.294	452.884	888.178
3	1	0	8	202	81	582	[62,571,106,591]					1013.23	674.931	735.149	1410.08	40638	59737.2	100375
3	1	0	8	203	141	582	[127,555,154,599]					1197.8	239.044	289.343	528.387	676.949	723	1399.95
3	1	0	8	204	399	592	[370,569,422,621]					1247	269.354	299.272	568.626	491.2	493.596	984.796
3	1	0	8	205	272	590	[260,578,293,612]					831.338	248.47	268.3	516.77	474.067	478.2	952.267
3	1	0	8	206	199	582	[181,570,229,613]					1131.37	241.919	275.322	517.241	505.515	549.315	1054.83
3	1	0	8	207	436	589	[419,566,458,622]					702.269	259.954	279.731	539.685	500.01	521.773	1021.78
3	1	0	8	208	750	594	[733,579,795,614]					680.741	254.682	276.574	531.256	453.416	461.019	914.435
3	1	0	8	209	153	609	[132,585,182,629]					849.496	406.422	460.303	866.725	1131.34	891.919	2023.26
3	1	0	8	210	58	604	[43,581,71,628]					758.458	806.652	894.96	1701.61	40754.3	50561.5	91315.8
3	1	0	8	211	106	600	[98,580,121,611]					795.101	717.74	596.481	1314.22	42064.9	35584.9	77649.8
3	1	0	8	212	834	616	[773,587,891,664]					888.53	243.037	274.838	517.875	438.651	462.222	900.873
3	1	0	8	213	956	635	[866,583,1024,687]					544.842	220.157	247.526	467.683	397.226	423.955	821.181
3	1	0	8	214	217	611	[192,580,240,640]					1027.9	242.231	274.561	516.792	499.648	551.525	1051.17
3	1	0	8	215	321	615	[300,585,341,651]					1233.87	255.732	290.869	546.601	484.883	501.094	985.977
3	1	0	8	216	475	609	[421,562,509,642]					1094.79	263.021	297.718	560.739	495.136	509.805	1004.94
3	1	0	8	217	112	620	[98,609,131,630]					648.524	863.815	625.508	1489.32	45006.9	30187.4	75194.3
3	1	0	8	218	405	624	[373,609,423,650]					1186.12	263.554	288.252	551.806	494.846	507.624	1002.47
3	1	0	8	219	356	599	[337,572,388,641]					709.323	252.91	265.556	518.466	480.516	486.586	967.102
3	1	0	8	220	138	623	[127,614,150,635]					1007.41	246.339	264.856	511.195	1003.23	1230.43	2233.66
3	1	0	8	221	280	625	[246,597,305,644]					1153.74	249.667	283.723	533.39	472.546	489.872	962.418
3	1	0	8	222	17	637	[1,612,34,656]					633.371	282.535	280.79	563.325	965.969	572.819	1538.79
3	1	0	8	223	165	645	[142,622,198,676]					1202.19	239.82	283.917	523.737	723.251	653.702	1376.95
3	1	0	8	224	715	643	[667,571,774,702]					621.079	258.064	273.214	531.278	469.316	467.968	937.284
3	1	0	8	225	52	633	[42,622,76,651]					644.402	1517.42	1603.94	3121.36	40402.2	38758.7	79160.9
3	1	0	8	226	356	653	[317,623,387,679]					1043.28	256.493	295.274	551.767	474.266	501.529	975.795
3	1	0	8	227	95	639	[74,625,117,658]					806.858	1972.37	1670.86	3643.23	57309.7	53775.2	111085
3	1	0	8	228	238	642	[181,599,258,668]					1155.42	246.668	289.524	536.192	497.198	511.696	1008.89
3	1	0	8	229	439	649	[386,628,476,677]					979.828	261	292.282	553.282	501.807	520.661	1022.47
3	1	0	8	230	504	644	[468,598,540,680]					629.618	262.795	271.798	534.593	503.116	508.933	1012.05
3	1	0	8	231	543	641	[513,595,581,674]					724.673	263.503	283.762	547.265	501.948	507.901	1009.85
3	1	0	8	232	797	652	[749,617,932,707]					879.103	245.052	277.598	522.65	440.415	458.062	898.477
3	1	0	8	233	302	667	[254,632,320,686]					1219.71	253.129	292.522	545.651	483.735	491.184	974.919
3	1	0	8	234	631	650	[575,604,681,704]					839.918	262.863	295.112	557.975	498.773	501.959	1000.73
3	1	0	8	235	101	671	[77,654,115,685]					14055.5	1795.07	1828.56	3623.63	63542.4	65517.3	129060
3	1	0	8	236	124	665	[113,652,138,684]					990.558	1222.65	1345.03	2567.68	32419.9	27077	59496.9
3	1	0	8	237	223	670	[191,649,241,687]					1022.55	242.939	268.232	511.171	507.512	515.535	1023.05
3	1	0	8	238	418	677	[383,655,456,708]					959.527	259.776	296.011	555.787	492.72	499.355	992.075
3	1	0	8	239	315	690	[291,656,346,712]					776.58	251.239	272.706	523.945	476.707	485.439	962.146
3	1	0	8	240	259	671	[226,654,292,697]					1203.42	252.365	288.5	540.865	494.447	511.179	1005.63
3	1	0	8	241	530	685	[494,669,568,706]					1132.92	267.793	293.894	561.687	504.447	512.847	1017.29
3	1	0	8	242	148	684	[134,674,166,728]					997.929	230.908	258.442	489.35	626.874	933	1559.87
3	1	0	8	243	475	684	[454,652,506,708]					944.15	262.055	288.626	550.681	497.796	493.537	991.333
3	1	0	8	244	585	670	[560,631,611,699]					657.611	262.998	284.578	547.576	496.241	510.2	1006.44
3	1	0	8	245	126	685	[116,677,134,697]					904.092	477.671	434.42	912.091	16452.9	7799.45	24252.4
3	1	0	8	246	15	681	[1,658,38,712]					669.566	216.043	240.018	456.061	482.118	500.823	982.941
3	1	0	8	247	350	694	[324,662,388,721]					1065.01	254.67	286.401	541.071	490.751	488.342	979.093
3	1	0	8	248	107	691	[99,683,118,699]					1308.16	617.193	456.108	1073.3	17966.6	10889.2	28855.8
3	1	0	8	249	417	715	[375,682,437,735]					979	259.523	279.934	539.457	488.65	493.702	982.352
3	1	0	8	250	880	694	[829,667,998,730]					507.137	228.037	250.579	478.616	411.573	436.533	848.106
3	1	0	8	251	591	737	[549,689,631,779]					785.206	262.155	286.809	548.964	495.444	510.519	1005.96
3	1	0	8	252	659	725	[620,659,702,782]					858.645	261.624	296.051	557.675	489.126	493.272	982.398
3	1	0	8	253	121	706	[109,697,131,715]					614.478	343.029	397.565	740.594	1716.91	1806.38	3523.29
3	1	0	8	254	376	725	[337,695,403,759]					986.346	257.798	293.478	551.276	493.156	498.688	991.844
3	1	0	8	255	283	719	[266,684,305,737]					1393.05	261.868	310.834	572.702	494.198	522.623	1016.82
3	1	0	8	256	191	716	[155,664,229,751]					965.476	234.353	273.502	507.855	493.855	503.271	997.126
3	1	0	8	257	249	710	[200,677,269,738]					914.336	247.964	272.86	520.824	538.419	497.664	1036.08
3	1	0	8	258	536	718	[515,699,563,746]					575.091	264.623	286.424	551.047	499.846	507.424	1007.27
3	1	0	8	259	62	721	[1,690,91,749]					1200.97	217.23	275.876	493.106	507.473	549.229	1056.7
3	1	0	8	260	131	732	[87,712,159,762]					916.706	232.741	270.677	503.418	521.739	598.084	1119.82
3	1	0	8	261	759	723	[696,676,829,773]					741.66	254.314	289.681	543.995	463.051	489.83	952.881
3	1	0	8	262	322	730	[297,707,353,763]					972.567	253.965	273.486	527.451	494.754	504.208	998.962
3	1	0	8	263	456	716	[434,684,509,754]					941.303	262.809	282.876	545.685	501.947	504.708	1006.65
3	1	0	8	264	190	761	[175,735,227,779]					1130.19	241.065	280.06	521.125	467.457	500.838	968.295
3	1	0	8	265	242	746	[222,726,266,776]					1014.63	249.696	279.006	528.702	484.326	494.663	978.989
3	1	0	8	266	515	742	[494,699,567,778]					820.257	265.095	284.958	550.053	497.427	498.094	995.521
3	1	0	8	267	897	749	[809,693,986,795]					707.23	227.558	257.469	485.027	406.743	443.082	849.825
3	1	0	8	268	975	725	[921,701,1020,760]					433.33	213.256	240.73	453.986	377.674	405.83	783.504
3	1	0	8	269	296	747	[260,731,311,769]					982.151	263.625	284.259	547.884	500.43	511.473	1011.9
3	1	0	8	270	444	759	[410,727,476,783]					922.365	263.392	292.91	556.302	488.315	492.775	981.09
3	1	0	8	271	81	753	[59,736,102,785]					838.069	222.781	250.644	473.425	446.659	474.119	920.778
3	1	0	8	272	38	760	[1,735,69,800]					950.769	214.394	249.897	464.291	413.066	427.236	840.302
3	1	0	8	273	274	761	[257,747,298,782]					788.41	251.244	270.581	521.825	481.904	485.81	967.714
3	1	0	8	274	481	763	[454,749,517,789]					777.729	263.358	288.899	552.257	492.875	479.589	972.464
3	1	0	8	275	515	769	[504,758,533,793]					728.231	265.635	293.791	559.426	491.938	496.824	988.762
3	1	0	8	276	162	769	[130,743,184,807]					1290.52	238.356	281.134	519.49	471.175	508.323	979.498
3	1	0	8	277	112	779	[85,743,138,837]					694.413	223.114	246.62	469.734	443.764	458.152	901.916
3	1	0	8	278	830	786	[796,758,866,824]					627.365	241.482	257.627	499.109	430.573	447.857	878.43
3	1	0	8	279	394	764	[361,730,432,796]					1202.6	258.459	291.14	549.599	496.719	526.07	1022.79
3	1	0	8	280	356	774	[323,758,380,791]					912.065	254.994	267.514	522.508	494.885	498.738	993.623
3	1	0	8	281	475	784	[450,774,491,801]					796.59	262.695	280.467	543.162	487.559	500.381	987.94
3	1	0	8	282	311	780	[292,757,336,806]					980.751	258.785	293.469	552.254	484.088	482.976	967.064
3	1	0	8	283	685	784	[636,736,753,818]					882.69	259.351	284.31	543.661	478.071	535.743	1013.81
3	1	0	8	284	49	798	[19,779,65,817]					613.272	212.186	230.497	442.683	393.205	406.231	799.436
3	1	0	8	285	152	793	[136,778,176,821]					1092.71	235.426	251.744	487.17	465.92	490.154	956.074
3	1	0	8	286	216	791	[174,758,245,822]					889.792	238.766	278.303	517.069	464.26	503.18	967.44
3	1	0	8	287	344	794	[328,777,394,817]					1196.85	259.145	288.828	547.973	490.028	495.736	985.764
3	1	0	8	288	264	797	[238,767,302,871]					995.824	246.998	278.545	525.543	470.441	476.742	947.183
3	1	0	8	289	137	806	[120,786,155,827]					1029.19	229.744	260.883	490.627	434.958	468.058	903.016
3	1	0	8	290	924	828	[849,779,1000,879]					514	221.2	253.389	474.589	388.538	416.031	804.569
3	1	0	8	291	81	806	[52,779,111,832]					1072.54	222.541	265.112	487.653	414.705	438.559	853.264
3	1	0	8	292	420	799	[391,773,438,822]					1020.46	259.541	295.505	555.046	487.281	486.252	973.533
3	1	0	8	293	306	811	[293,796,322,831]					798.393	256.641	287.663	544.304	470.94	472.528	943.468
3	1	0	8	294	1059	807	[1045,801,1065,814]					453.324	196.022	196.6	392.622	322.341	321.438	643.779
3	1	0	8	295	487	811	[467,782,517,831]					972.688	265.341	299.906	565.247	485.984	509.083	995.067
3	1	0	8	296	536	807	[500,768,574,844]					1064.98	261.435	303.986	565.421	490.77	506.421	997.191
3	1	0	8	297	1008	811	[994,790,1028,839]					479.568	201.386	208.379	409.765	345.333	345.663	690.996
3	1	0	8	298	384	812	[367,798,397,843]					1014.56	259.334	291.635	550.969	479.021	487.212	966.233
3	1	0	8	299	8	807	[1,791,18,835]					698.718	208.042	227.436	435.478	367.748	368.582	736.33
3	1	0	8	300	448	825	[386,777,475,877]					859.051	264.48	283.97	548.45	482.241	481.436	963.677
3	1	0	8	301	770	821	[669,761,858,878]					725.886	249.282	283.568	532.85	457.537	507.659	965.196
3	1	0	8	302	205	834	[173,809,243,864]					1007.81	234.044	262.801	496.845	448.762	466.567	915.329
3	1	0	8	303	612	823	[555,769,675,880]					954.761	259.327	283.183	542.51	486.74	499.831	986.571
3	1	0	8	304	32	823	[15,801,65,848]					726.092	211.718	236.34	448.058	388.944	402.525	791.469
3	1	0	8	305	144	828	[122,813,186,845]					660.446	225.624	258.272	483.896	426.071	454.12	880.191
3	1	0	8	306	319	833	[293,805,340,853]					1176.94	255.847	291.27	547.117	478.055	500.02	978.075
3	1	0	8	307	354	832	[321,805,390,875]					792.053	254.233	272.868	527.101	470.471	469.059	939.53
3	1	0	8	308	235	841	[210,820,249,856]					1123.58	245.311	281.554	526.865	452.963	471.533	924.496
3	1	0	8	309	148	851	[98,835,164,863]					1015.06	225.493	256.602	482.095	422.639	436.5	859.139
3	1	0	8	310	495	860	[456,824,541,899]					699.363	257.666	269.889	527.555	476.471	474.222	950.693
3	1	0	8	311	75	851	[21,826,106,894]					807.903	216.243	256.903	473.146	401.231	422.233	823.464
3	1	0	8	312	398	845	[383,831,414,875]					689.827	259.937	284.99	544.927	487.889	493.612	981.501
3	1	0	8	313	140	871	[89,851,157,891]					619.419	222.711	246.181	468.892	422.739	427.124	849.863
3	1	0	8	314	558	856	[534,838,597,882]					1044.3	259.522	286.217	545.739	486.706	505.072	991.778
3	1	0	8	315	304	877	[265,847,357,939]					674.644	249.339	277.515	526.854	487.196	586.442	1073.64
3	1	0	8	316	10	860	[1,837,25,888]					687.74	205.773	218.562	424.335	359.11	358.788	717.898
3	1	0	8	317	397	878	[384,833,431,892]					625.563	256.047	280.333	536.38	489.217	504.643	993.86
3	1	0	8	318	182	879	[147,837,215,910]					691.683	228.006	234.842	462.848	434.783	440.95	875.733
3	1	0	8	319	231	871	[207,844,266,916]					734.24	237.248	259.91	497.158	452.969	465.12	918.089
3	1	0	8	320	341	890	[326,865,374,920]					659.235	252.12	281.757	533.877	465.025	485.791	950.816
3	1	0	8	321	701	881	[675,852,730,919]					813.452	253.625	283.952	537.577	469.634	477.471	947.105
3	1	0	8	322	859	873	[818,852,937,897]					476.063	228.289	246.137	474.426	411.004	449.558	860.562
3	1	0	8	323	53	887	[28,865,76,904]					704.358	210.519	231.664	442.183	383.284	405.761	789.045
3	1	0	8	324	100	886	[66,872,112,913]					974.508	221.427	262.758	484.185	406.177	436.608	842.785
3	1	0	8	325	459	900	[386,873,490,937]					1094.19	257.69	294.45	552.14	476.49	485.718	962.208
3	1	0	8	326	12	894	[1,885,24,909]					772.548	208.942	226.209	435.151	352.546	362.53	715.076
3	1	0	8	327	369	905	[345,873,396,935]					878.757	254.058	281.312	535.37	462.967	472.211	935.178
3	1	0	8	328	127	896	[94,870,149,917]					793.102	223.102	238.75	461.852	421.842	424.641	846.483
3	1	0	8	329	564	897	[539,874,608,937]					700.201	256.322	270.73	527.052	481.981	520	1001.98
3	1	0	8	330	805	893	[784,872,979,932]					500.723	226.13	258.139	484.269	400.627	445.495	846.122
3	1	0	8	331	744	919	[696,868,793,979]					482.206	245.707	263.361	509.068	449.443	466.577	916.02
3	1	0	8	332	212	909	[198,887,227,920]					818.255	237.162	256.915	494.077	442.743	462.064	904.807
3	1	0	8	333	633	904	[585,846,684,946]					664.467	254.187	267.015	521.202	474.76	523.27	998.03
3	1	0	8	334	261	919	[226,875,307,954]					493.643	241.283	264.724	506.007	435.185	442.051	877.236
3	1	0	8	335	515	925	[483,890,543,978]					616.337	254.911	269.098	524.009	460.617	469.185	929.802
3	1	0	8	336	421	925	[382,903,463,952]					971.642	256.911	312.096	569.007	465.577	512.348	977.925
3	1	0	8	337	210	932	[183,910,230,961]					715.5	230.114	251.033	481.147	422.719	448.727	871.446
3	1	0	8	338	17	924	[1,910,29,935]					522.818	206.855	216.832	423.687	338.608	340.462	679.07
3	1	0	8	339	61	919	[44,905,97,935]					630.24	206.162	222.646	428.808	375.582	380.99	756.572
3	1	0	8	340	119	920	[92,909,145,943]					616.301	219.407	239.175	458.582	410.372	416.369	826.741
3	1	0	8	341	168	921	[137,902,197,950]					906.455	223.718	259.179	482.897	419.934	428.768	848.702
3	1	0	8	342	860	956	[784,903,957,1024]					569.662	221.811	249.577	471.388	411.412	450.046	861.458
3	1	0	8	343	32	939	[21,915,47,966]					746.813	209.405	230.659	440.064	339.023	344.121	683.144
3	1	0	8	344	577	924	[527,913,591,951]					870.093	254.847	283.528	538.375	464.52	465.407	929.927
3	1	0	8	345	130	952	[103,931,164,970]					679.228	216.391	243.809	460.2	388.369	394.662	783.031
3	1	0	8	346	173	959	[149,933,200,977]					867.071	224.611	262.814	487.425	402.499	430.8	833.299
3	1	0	8	347	369	959	[326,911,408,1007]					690.993	244.979	260.285	505.264	436.572	446.675	883.247
3	1	0	8	348	61	950	[39,932,85,971]					689.4	204.826	218.636	423.462	349.479	371.564	721.043
3	1	0	8	349	300	944	[287,924,325,970]					675.857	245.122	258.971	504.093	435.806	446.479	882.285
3	1	0	8	350	578	955	[521,934,609,989]					965.18	254.222	290.365	544.587	463.816	469.91	933.726
3	1	0	8	351	239	947	[212,931,256,963]					821.129	238.77	274.758	513.528	430.942	473.71	904.652
3	1	0	8	352	99	953	[78,934,115,967]					643.615	213.795	228.901	442.696	378.478	383.329	761.807
3	1	0	8	353	469	952	[446,936,498,977]					673.92	250.831	274.451	525.282	451.335	471.708	923.043
3	1	0	8	354	14	952	[1,940,22,966]					368.075	206.797	210.375	417.172	334.282	353.075	687.357
3	1	0	8	355	425	969	[396,944,454,1005]					617.189	248.006	271	519.006	433.067	454.368	887.435
3	1	0	8	356	677	945	[629,918,719,985]					656.098	248.854	274.88	523.734	442.262	447.924	890.186
3	1	0	8	357	323	955	[303,943,331,980]					664.202	243.187	263.539	506.726	429.002	435.809	864.811
3	1	0	8	358	192	975	[170,957,243,994]					630.867	223.75	251	474.75	400.656	418.673	819.329
3	1	0	8	359	87	970	[63,956,102,986]					552.861	206.169	221.922	428.091	351.228	353.678	704.906
3	1	0	8	360	12	973	[1,965,28,983]					479.522	207.151	217.939	425.09	327.401	330.87	658.271
3	1	0	8	361	41	970	[29,962,49,983]					549.659	205.263	213.864	419.127	338.113	342.466	680.579
3	1	0	8	362	267	972	[239,948,306,1038]					532.153	233.219	259.136	492.355	409.491	417.5	826.991
3	1	0	8	363	52	978	[41,969,64,994]					517.906	209.836	221.826	431.662	352.159	364.483	716.642
3	1	0	8	364	299	981	[285,966,310,1002]					595.376	240.878	262.785	503.663	419.252	433.065	852.317
3	1	0	8	365	683	989	[665,966,702,1018]					673.041	245.391	263.099	508.49	423.234	432.769	856.003
3	1	0	8	366	468	986	[444,963,494,1007]					665.612	249.37	268.01	517.38	429.881	443.621	873.502
3	1	0	8	367	134	983	[78,967,173,1010]					631.8	210.11	234.069	444.179	371.025	393.952	764.977
3	1	0	8	368	628	1046	[605,940,657,1078]					587.686	240.553	267.855	508.408	425.17	451.622	876.792
3	1	0	8	369	322	989	[260,958,344,1078]					521.7	228.737	254.75	483.487	397.332	421.25	818.582
3	1	0	8	370	533	991	[509,968,559,1029]					765.661	250.274	279.802	530.076	445.266	462.677	907.943
3	1	0	8	371	577	996	[508,960,616,1078]					653.807	240.7	269.647	510.347	426.666	460.251	886.917
3	1	0	8	372	491	1019	[465,975,522,1050]					690.543	243.727	270.756	514.483	428.845	452.48	881.325
3	1	0	8	373	236	1019	[189,976,291,1078]					649.241	221.199	243.466	464.665	391.241	425.672	816.913
3	1	0	8	374	709	1045	[675,959,748,1078]					559.139	234.59	260.03	494.62	408.51	432.97	841.48
3	1	0	8	375	818	1031	[758,959,903,1078]					531.464	221.355	247.652	469.007	428.18	423.08	851.26
3	1	0	8	376	161	1006	[125,984,182,1056]					699.748	211.265	229.833	441.098	369.178	383.342	752.52
3	1	0	8	377	586	1055	[556,996,615,1078]					488.484	236.018	254.011	490.029	411.248	437.674	848.922
3	1	0	8	378	666	1035	[643,982,685,1078]					544.656	236.423	257.113	493.536	410.553	422.458	833.011
3	1	0	8	379	340	1033	[294,975,397,1078]					543.572	230.135	259.131	489.266	399.353	414.538	813.891
3	1	0	8	380	753	1019	[717,978,785,1078]					532.411	229.275	249.304	478.579	402.891	431.732	834.623
3	1	0	8	381	188	1023	[155,984,217,1078]					608.513	214.379	245.319	459.698	377.956	402.248	780.204
3	1	0	8	382	104	1022	[86,1002,128,1039]					750.01	204.692	216.615	421.307	348.697	350.813	699.51
3	1	0	8	383	434	1017	[361,982,469,1078]					626.93	238.604	261.368	499.972	413.836	426.099	839.935
3	1	0	8	384	388	1037	[357,1010,408,1074]					601.278	234.938	258.026	492.964	406.175	416.576	822.751
3	1	0	8	385	24	1036	[15,1028,36,1050]					683.427	203.881	207.848	411.729	326.53	327.823	654.353
3	1	0	8	386	449	1059	[422,1032,476,1078]					550.425	232.373	250.336	482.709	407.185	412.209	819.394
3	1	0	8	387	484	1061	[465,1043,525,1078]					646.273	233.693	255.106	488.799	406.273	427.658	833.931
3	1	0	8	388	233	1060	[188,1041,257,1078]					574.415	214.415	234.205	448.62	369.121	385.54	754.661
3	1	0	8	389	880	303	[821,271,938,340]					539.08	228.718	243.904	472.622	413.034	437.176	850.21
3	1	0	8	390	85	608	[68,589,100,631]					10637	976	944.46	1920.46	64148.9	62723	126872
3	1	0	9	1	834	10	[823,1,857,27]					381.348	219.423	209.38	428.803	377.673	388.391	766.064
3	1	0	9	2	453	42	[426,1,485,70]					358.202	226.323	233.079	459.402	423.902	441.787	865.689
3	1	0	9	3	174	60	[157,39,188,79]					421.45	202.125	204.46	406.585	371.948	370.89	742.838
3	1	0	9	4	705	43	[657,1,785,87]					475.839	221.218	236.565	457.783	401.476	413.968	815.444
3	1	0	9	5	580	63	[467,1,670,126]					456.796	233.018	249.806	482.824	435.55	478.337	913.887
3	1	0	9	6	232	95	[178,68,261,127]					549.813	216.444	263.731	480.175	394.303	472.527	866.83
3	1	0	9	7	271	83	[195,10,296,122]					346.868	215.154	225.754	440.908	410.477	425.912	836.389
3	1	0	9	8	1019	103	[1012,97,1029,110]					504.183	202.321	204.14	406.461	425.279	420.344	845.623
3	1	0	9	9	1004	110	[990,102,1014,119]					441.878	202.117	205.822	407.939	462.355	445.144	907.499
3	1	0	9	10	947	105	[929,76,1011,157]					550.769	204.257	220.262	424.519	553.416	628.615	1182.03
3	1	0	9	11	871	117	[803,20,953,188]					579.819	216.158	245.292	461.45	433.682	443.632	877.314
3	1	0	9	12	368	69	[261,1,513,196]					679.295	233.009	260.651	493.66	504.417	872.904	1377.32
3	1	0	9	13	965	170	[940,149,1008,208]					502.685	207.511	213.82	421.331	463.16	506.045	969.205
3	1	0	9	14	1036	180	[1027,171,1042,187]					597.62	206.528	209.92	416.448	367.727	372.52	740.247
3	1	0	9	15	911	180	[878,145,956,225]					581.775	217.746	235.587	453.333	450.685	443.116	893.801
3	1	0	9	16	1057	199	[1052,194,1065,220]					378.6	181.749	181.749	363.498	331.913	331.913	663.826
3	1	0	9	17	775	172	[725,83,822,250]					693.467	233.35	264.739	498.089	461.408	491.913	953.321
3	1	0	9	18	995	209	[983,197,1020,222]					552.327	207.822	222.551	430.373	397.242	411.99	809.232
3	1	0	9	19	685	138	[622,19,830,247]					590.19	234.465	256.302	490.767	453.588	510.034	963.622
3	1	0	9	20	405	206	[342,130,458,238]					547.581	244.289	255.197	499.486	780.231	804.949	1585.18
3	1	0	9	21	862	220	[797,173,912,280]					694.794	225.883	256.889	482.772	443.315	477.405	920.72
3	1	0	9	22	937	228	[895,181,983,266]					703.538	215.574	233.019	448.593	425.048	443.047	868.095
3	1	0	9	23	997	235	[978,219,1023,250]					720.35	212.981	228.12	441.101	378.698	401.273	779.971
3	1	0	9	24	300	163	[187,49,405,264]					800.143	233.207	264.162	497.369	534.537	725.257	1259.79
3	1	0	9	25	421	248	[398,230,439,265]					716.827	251.295	270.857	522.152	641.003	666.418	1307.42
3	1	0	9	26	976	253	[957,212,1013,279]					743	211.04	232.709	443.749	389.581	381.447	771.028
3	1	0	9	27	482	233	[437,107,573,307]					1032.98	255.519	298.036	553.555	577.422	587.44	1164.86
3	1	0	9	28	654	255	[596,151,706,315]					820.356	252.057	271.922	523.979	511.609	522	1033.61
3	1	0	9	29	751	262	[704,230,853,299]					881.258	241.514	275.887	517.401	483.037	530.155	1013.19
3	1	0	9	30	1029	274	[1021,266,1037,284]					458.745	203.39	205.816	409.206	368.652	376.102	744.754
3	1	0	9	31	380	276	[203,197,410,310]					976.375	242.067	275.021	517.088	545.094	632.177	1177.27
3	1	0	9	32	425	278	[400,251,450,301]					647.298	254.692	270.54	525.232	559.135	550.75	1109.88
3	1	0	9	33	955	285	[919,262,1010,309]					769.976	213.755	237.5	451.255	398.311	432.024	830.335
3	1	0	9	34	738	293	[724,278,749,306]					596.571	257.867	271.731	529.598	516.353	529.042	1045.39
3	1	0	9	35	703	296	[681,258,783,336]					862.376	251.014	268.889	519.903	511.714	525.248	1036.96
3	1	0	9	36	242	249	[151,172,366,332]					768.74	230.454	258.367	488.821	482.441	524.051	1006.49
3	1	0	9	37	562	261	[500,108,639,330]					902.425	253.555	283.467	537.022	597.034	755.992	1353.03
3	1	0	9	38	1020	294	[1002,275,1041,308]					527.507	206.239	217.088	423.327	372.131	374.743	746.874
3	1	0	9	39	909	286	[859,251,950,312]					495.638	221.544	239.876	461.42	435.944	452.743	888.687
3	1	0	9	40	785	309	[765,285,805,334]					666.163	242.039	253.515	495.554	496.808	509.495	1006.3
3	1	0	9	41	421	316	[371,289,449,348]					684.191	254.592	278.843	533.435	614.457	634.348	1248.8
3	1	0	9	42	837	318	[797,254,911,365]					784.184	233.006	255.233	488.239	457.741	473.767	931.508
3	1	0	9	43	299	325	[188,259,323,348]					891.649	235.827	257.27	493.097	483.35	476.2	959.55
3	1	0	9	44	719	330	[695,315,745,354]					563.678	254.653	261.744	516.397	523.645	532.489	1056.13
3	1	0	9	45	961	337	[901,305,1034,371]					625.919	215.492	233.296	448.788	407.688	430.629	838.317
3	1	0	9	46	1072	337	[1056,326,1078,346]					380.217	198.859	200.601	399.46	346.761	349.664	696.425
3	1	0	9	47	342	324	[317,297,375,353]					868.53	253.728	271.293	525.021	534.464	519.213	1053.68
3	1	0	9	48	666	328	[630,299,732,366]					1279.94	259.033	294.806	553.839	527.74	573.775	1101.51
3	1	0	9	49	762	341	[751,329,816,365]					695.879	245.174	267.177	512.351	493.966	514.855	1008.82
3	1	0	9	50	930	367	[897,331,955,393]					824.673	223.373	256.084	479.457	431.324	444.654	875.978
3	1	0	9	51	476	333	[433,268,520,376]					942.151	258.893	280.877	539.77	737.31	738.208	1475.52
3	1	0	9	52	346	356	[316,340,367,387]					797.153	247.801	265.71	513.511	508.023	526.169	1034.19
3	1	0	9	53	214	353	[192,331,248,385]					664.205	232.487	255.5	487.987	459.713	454.598	914.311
3	1	0	9	54	802	366	[765,346,829,389]					687.094	245.569	262.769	508.338	487.298	490.569	977.867
3	1	0	9	55	570	363	[523,310,597,388]					1107.1	262.998	300.535	563.533	627.139	658.522	1285.66
3	1	0	9	56	63	351	[31,320,90,379]					541.708	201.589	210.169	411.758	391.595	390.596	782.191
3	1	0	9	57	402	360	[390,344,413,377]					998.194	262.788	281.713	544.501	618.84	621.583	1240.42
3	1	0	9	58	423	362	[389,327,447,387]					903.509	257.542	279.651	537.193	622.911	658.698	1281.61
3	1	0	9	59	748	363	[720,330,776,389]					1151.5	254.159	283.261	537.42	514.449	543.53	1057.98
3	1	0	9	60	645	369	[617,313,676,411]					847.091	262.299	286.752	549.051	633.636	642.099	1275.74
3	1	0	9	61	870	365	[843,336,902,383]					662.65	230.443	246.472	476.915	455.186	479.927	935.113
3	1	0	9	62	715	368	[702,352,732,381]					837.573	262.449	282.099	544.548	542.757	555.191	1097.95
3	1	0	9	63	1071	370	[1060,365,1078,382]					438.576	175.776	175.776	351.552	322.321	322.321	644.642
3	1	0	9	64	376	349	[331,315,395,396]					1016.61	252.712	287.947	540.659	566.359	572.856	1139.22
3	1	0	9	65	168	292	[120,233,339,404]					890.978	228.074	270.989	499.063	469.431	503.978	973.409
3	1	0	9	66	397	375	[389,367,406,391]					860.848	262.62	272.752	535.372	551.239	557.771	1109.01
3	1	0	9	67	607	325	[579,303,628,394]					894.295	260.23	278.695	538.925	576.573	606.162	1182.74
3	1	0	9	68	686	374	[657,354,708,408]					825.64	260.683	285.154	545.837	574.763	596.926	1171.69
3	1	0	9	69	420	391	[386,372,442,409]					890.986	256.92	280.93	537.85	549.549	604.148	1153.7
3	1	0	9	70	904	381	[885,350,930,397]					858.585	227.217	245.926	473.143	438.982	458.437	897.419
3	1	0	9	71	140	388	[70,299,197,440]					639.959	220.676	274.648	495.324	511.851	2594.32	3106.17
3	1	0	9	72	836	389	[807,355,874,445]					1243.82	239.996	292.711	532.707	476.041	515.332	991.373
3	1	0	9	73	1036	389	[1027,376,1049,398]					772.869	202.18	208.172	410.352	350.456	352.262	702.718
3	1	0	9	74	988	375	[950,348,1026,423]					821.682	214.432	238.509	452.941	402.623	422.659	825.282
3	1	0	9	75	519	356	[498,324,561,420]					1087.19	264.646	298.73	563.376	666.728	678.224	1344.95
3	1	0	9	76	875	390	[862,382,889,412]					939.926	235.896	253.82	489.716	456.853	462.008	918.861
3	1	0	9	77	711	390	[699,376,732,406]					620.065	256.674	261.237	517.911	545.113	555.355	1100.47
3	1	0	9	78	682	411	[649,384,709,453]					779.404	260.389	276.606	536.995	613.937	632.5	1246.44
3	1	0	9	79	621	411	[587,378,653,434]					975.967	265.499	292.145	557.644	657.025	716.696	1373.72
3	1	0	9	80	574	402	[553,386,594,428]					939.505	269.275	289.851	559.126	603.668	631.74	1235.41
3	1	0	9	81	777	398	[757,378,821,434]					777.625	248.494	269.458	517.952	508.224	515.815	1024.04
3	1	0	9	82	741	438	[715,378,772,474]					836.304	255.57	278.652	534.222	553.887	567.404	1121.29
3	1	0	9	83	206	392	[181,367,228,440]					593.25	232.896	257.424	490.32	460.803	466.728	927.531
3	1	0	9	84	878	418	[865,390,904,453]					861.77	232.146	253.306	485.452	456.167	460.418	916.585
3	1	0	9	85	496	385	[470,362,519,428]					1229.47	261.636	292.573	554.209	620.103	597.521	1217.62
3	1	0	9	86	250	394	[226,368,269,420]					702.321	237.507	264.613	502.12	460.903	483.689	944.592
3	1	0	9	87	289	391	[254,370,307,440]					574.181	242.11	254.443	496.553	483.774	484.801	968.575
3	1	0	9	88	983	421	[972,398,1004,443]					649.138	214.373	228.698	443.071	404.981	407.94	812.921
3	1	0	9	89	708	420	[690,403,732,444]					679.99	258.978	283.267	542.245	578.373	614.286	1192.66
3	1	0	9	90	1012	414	[991,381,1036,436]					775.981	209.477	229.648	439.125	382.768	393.176	775.944
3	1	0	9	91	314	416	[297,400,339,439]					670.637	251.531	274.242	525.773	504.061	522.582	1026.64
3	1	0	9	92	452	411	[384,371,487,436]					739.483	261.424	287.112	548.536	553.618	592.926	1146.54
3	1	0	9	93	267	419	[255,396,282,432]					745.539	241.66	257.742	499.402	551.114	486.045	1037.16
3	1	0	9	94	359	406	[335,386,402,462]					993.249	252.521	280.596	533.117	505.805	527.367	1033.17
3	1	0	9	95	592	414	[574,397,620,446]					899.366	272.863	293.699	566.562	702.701	739.902	1442.6
3	1	0	9	96	797	428	[771,403,835,445]					919.791	248.745	272.015	520.76	508.441	538.019	1046.46
3	1	0	9	97	537	423	[513,406,554,460]					950.066	266.682	286.942	553.624	640.051	661.555	1301.61
3	1	0	9	98	229	415	[201,392,258,450]					881.487	240.824	263.084	503.908	471.593	492.924	964.517
3	1	0	9	99	1049	434	[1037,416,1056,443]					604.479	210.233	215.103	425.336	363.972	368.428	732.4
3	1	0	9	100	923	416	[888,388,974,455]					1039.27	224.062	251.528	475.59	432.698	460.129	892.827
3	1	0	9	101	232	431	[227,426,241,444]					531.096	240.485	241.298	481.783	587.909	627.681	1215.59
3	1	0	9	102	507	428	[478,395,529,453]					818.842	264.556	292.151	556.707	594.074	594.486	1188.56
3	1	0	9	103	1073	437	[1068,431,1078,448]					775.849	205.065	205.513	410.578	343.493	342.731	686.224
3	1	0	9	104	45	459	[14,419,65,481]					622.198	207.028	238.992	446.02	418.162	443.413	861.575
3	1	0	9	105	893	437	[884,422,911,456]					746.959	232.826	253	485.826	459.582	492.531	952.113
3	1	0	9	106	345	436	[330,420,372,458]					882.354	249.964	262.48	512.444	519.39	526.263	1045.65
3	1	0	9	107	581	444	[540,421,610,475]					1248.17	283.33	362.706	646.036	791.672	1046.21	1837.88
3	1	0	9	108	824	456	[792,424,846,491]					1239.22	242.796	272.622	515.418	489.423	512.714	1002.14
3	1	0	9	109	469	451	[445,430,482,477]					883.6	264.609	286.373	550.982	546.842	570.032	1116.87
3	1	0	9	110	508	459	[465,440,547,483]					863.577	270.13	285.558	555.688	612.969	661.846	1274.82
3	1	0	9	111	159	440	[119,420,188,462]					759.617	229.215	242.92	472.135	453.43	464.114	917.544
3	1	0	9	112	438	444	[421,430,459,462]					855.959	271.052	326.85	597.902	536.382	576.531	1112.91
3	1	0	9	113	325	450	[301,431,348,474]					617.628	246.96	260.752	507.712	513.857	529.044	1042.9
3	1	0	9	114	774	453	[746,429,806,476]					1003.97	253.782	282.16	535.942	529.613	575.893	1105.51
3	1	0	9	115	1007	453	[969,431,1031,473]					711.012	211.489	229.295	440.784	397.362	404.886	802.248
3	1	0	9	116	859	455	[841,440,912,483]					894.227	232.313	261.082	493.395	460.362	465.9	926.262
3	1	0	9	117	268	458	[183,423,300,484]					749.416	240.289	263.816	504.105	453.065	471.616	924.681
3	1	0	9	118	150	491	[59,424,186,554]					533.186	220.386	237.227	457.613	449.028	449.232	898.26
3	1	0	9	119	447	484	[412,456,471,549]					564.466	259.555	265.995	525.55	525.826	553.346	1079.17
3	1	0	9	120	404	456	[379,431,432,494]					781.307	254.528	273.772	528.3	516.552	536.653	1053.2
3	1	0	9	121	1020	469	[1010,446,1048,493]					439.037	207.127	210.806	417.933	379.445	388.67	768.115
3	1	0	9	122	869	492	[830,465,900,520]					845.752	238.075	262.273	500.348	466.777	483.122	949.899
3	1	0	9	123	538	485	[514,465,562,507]					749.588	263.606	272.876	536.482	640.091	666.974	1307.07
3	1	0	9	124	303	478	[284,432,322,503]					841.72	246.639	263.013	509.652	497.393	506.414	1003.81
3	1	0	9	125	797	492	[741,462,867,561]					899.733	243.464	288.194	531.658	510.99	582.138	1093.13
3	1	0	9	126	940	457	[893,436,960,509]					1104.79	227.706	260.341	488.047	448.976	521.772	970.748
3	1	0	9	127	634	489	[617,470,657,507]					19021.7	2687.42	2835.64	5523.06	64791.7	65533.9	130326
3	1	0	9	128	278	498	[262,478,292,522]					588.277	241.205	249.35	490.555	480.071	523.051	1003.12
3	1	0	9	129	344	506	[307,455,377,540]					758.635	250.358	268.749	519.107	499.815	526.63	1026.44
3	1	0	9	130	952	494	[909,451,1009,535]					623.254	219.662	250.544	470.206	424.392	452.829	877.221
3	1	0	9	131	215	520	[80,473,270,586]					874.777	229.952	264.146	494.098	450.502	488.65	939.152
3	1	0	9	132	747	495	[727,472,819,542]					926.004	250.952	276.733	527.685	567.696	627.18	1194.88
3	1	0	9	133	585	511	[555,464,615,535]					1114.61	290.736	407.703	698.439	2065.3	6557.37	8622.67
3	1	0	9	134	1019	513	[985,482,1046,546]					1369.21	214.527	246.697	461.224	391.121	410.058	801.179
3	1	0	9	135	487	514	[436,477,531,550]					722.529	262.338	291.086	553.424	557.818	586.19	1144.01
3	1	0	9	136	399	503	[363,460,433,540]					813.237	253.853	281.339	535.192	516.329	532.881	1049.21
3	1	0	9	137	97	506	[59,478,126,547]					636.047	220.443	229.519	449.962	414.415	421.009	835.424
3	1	0	9	138	720	510	[701,471,794,559]					845.84	254.467	279.269	533.736	663.63	740.891	1404.52
3	1	0	9	139	630	514	[613,502,646,524]					975.037	1461.29	1221.86	2683.15	57855	57428.9	115284
3	1	0	9	140	681	517	[671,501,692,529]					1025.37	1451.84	1050.82	2502.66	32013.5	25810.9	57824.4
3	1	0	9	141	662	522	[648,498,676,540]					31932.5	2149.72	1582.43	3732.15	63289.5	65535	128824
3	1	0	9	142	300	527	[269,497,322,571]					608.919	245.13	267.975	513.105	478.436	497.957	976.393
3	1	0	9	143	902	530	[881,502,953,552]					771.81	226.083	250.216	476.299	451.63	461.388	913.018
3	1	0	9	144	972	537	[948,503,998,558]					570.404	216.047	229.934	445.981	414.676	427.316	841.992
3	1	0	9	145	546	531	[513,498,574,559]					1067.35	268.583	298.407	566.99	628.125	653.815	1281.94
3	1	0	9	146	640	525	[629,508,661,561]					904.181	1236.16	927.574	2163.73	59972.3	53285.1	113257
3	1	0	9	147	522	537	[514,531,529,553]					863.12	278.719	295.41	574.129	610.403	622.59	1232.99
3	1	0	9	148	50	566	[11,483,69,586]					758.845	207.818	221.875	429.693	390.612	399.887	790.499
3	1	0	9	149	1023	550	[1002,536,1043,570]					903.268	219.986	236.204	456.19	388.408	394.984	783.392
3	1	0	9	150	360	556	[316,527,408,591]					901.297	256.918	274.112	531.03	488.796	498.185	986.981
3	1	0	9	151	506	554	[487,535,528,575]					1030.89	265.768	296.894	562.662	544.746	608.144	1152.89
3	1	0	9	152	587	550	[564,533,612,605]					769.991	266.944	284.374	551.318	743.487	761.165	1504.65
3	1	0	9	153	923	554	[907,534,961,576]					1129.5	224.646	262.913	487.559	437.438	460.712	898.15
3	1	0	9	154	689	560	[675,537,704,574]					759.797	409.279	437.407	846.686	2125.58	2383.36	4508.94
3	1	0	9	155	613	555	[602,545,632,585]					849.068	274.671	292.237	566.908	1078.51	1155.01	2233.52
3	1	0	9	156	465	558	[431,533,496,593]					846.605	259.969	290.341	550.31	515.899	537.756	1053.65
3	1	0	9	157	668	562	[651,549,688,580]					914.527	663.895	648.488	1312.38	33432	41787.2	75219.2
3	1	0	9	158	870	546	[822,512,910,591]					735.806	233.763	263.32	497.083	473.519	540.447	1013.97
3	1	0	9	159	1051	552	[1041,540,1064,576]					725.735	211.758	220.672	432.43	369.252	374.103	743.355
3	1	0	9	160	570	565	[559,557,591,592]					695.725	268.803	278.743	547.546	651.248	664.771	1316.02
3	1	0	9	161	986	566	[966,546,1008,602]					844.66	209.306	230.947	440.253	403.281	432.309	835.59
3	1	0	9	162	546	564	[528,550,595,602]					803.076	265.565	282.333	547.898	596.786	641.829	1238.61
3	1	0	9	163	1024	575	[1007,565,1040,584]					654.556	209.69	224.256	433.946	381.721	383.376	765.097
3	1	0	9	164	952	582	[929,554,988,613]					727.981	218.997	239.037	458.034	425.656	441.893	867.549
3	1	0	9	165	423	565	[399,537,449,600]					741.098	256.7	284.87	541.57	518.163	512.391	1030.55
3	1	0	9	166	896	581	[861,560,933,603]					877.253	230.747	264.073	494.82	470.885	478.773	949.658
3	1	0	9	167	526	585	[489,563,572,620]					1065.18	263.874	301.051	564.925	535.295	594.071	1129.37
3	1	0	9	168	701	585	[679,557,723,601]					1213.03	345.54	520.044	865.584	1587.24	4008.28	5595.52
3	1	0	9	169	649	583	[628,574,665,593]					613.748	267.717	285.05	552.767	1233.12	1226.31	2459.43
3	1	0	9	170	802	571	[740,535,832,605]					1067.83	250.149	298.39	548.539	534.035	603.239	1137.27
3	1	0	9	171	1047	585	[1040,578,1059,594]					548.832	217.691	216.674	434.365	425.7	385.063	810.763
3	1	0	9	172	730	594	[696,547,766,639]					662.174	282.841	401.185	684.026	663.096	890.217	1553.31
3	1	0	9	173	832	599	[813,584,851,634]					755.995	242.742	257.515	500.257	480.722	496.923	977.645
3	1	0	9	174	924	603	[889,589,943,633]					740.892	225.858	240.921	466.779	464.512	469.82	934.332
3	1	0	9	175	628	602	[603,579,665,633]					857.279	264.707	286.916	551.623	660.151	664.877	1325.03
3	1	0	9	176	381	615	[236,532,415,669]					682.547	252.752	277.849	530.601	487.842	481.928	969.77
3	1	0	9	177	1006	619	[978,585,1039,645]					749.676	210.41	234.983	445.393	389.265	388.961	778.226
3	1	0	9	178	873	610	[833,582,905,634]					943.882	237.595	278.435	516.03	468.981	488.988	957.969
3	1	0	9	179	767	617	[733,601,786,641]					798.78	261.391	286.937	548.328	515.21	533.868	1049.08
3	1	0	9	180	673	621	[649,595,712,648]					963.959	261.657	289.735	551.392	575.97	640.279	1216.25
3	1	0	9	181	440	613	[402,578,493,651]					836.646	260.93	285.811	546.741	528.262	540.863	1069.12
3	1	0	9	182	170	604	[51,554,260,664]					476.67	224.393	240.485	464.878	449.855	497.223	947.078
3	1	0	9	183	958	628	[935,602,982,650]					653.711	218.396	237.614	456.01	430.399	445.958	876.357
3	1	0	9	184	801	618	[778,590,817,642]					594.53	256.282	265.73	522.012	499.015	518.06	1017.07
3	1	0	9	185	282	609	[248,572,370,657]					653.633	245.908	280.356	526.264	480.207	491.622	971.829
3	1	0	9	186	914	628	[884,613,953,665]					1051.73	225.131	256.885	482.016	457.106	480.85	937.956
3	1	0	9	187	581	627	[545,599,615,662]					1017.8	265.35	295.134	560.484	552.261	568.97	1121.23
3	1	0	9	188	1050	632	[1020,624,1065,657]					556.204	208.678	218.393	427.071	410.914	377.699	788.613
3	1	0	9	189	51	651	[1,599,96,688]					439.858	207.391	213.549	420.94	432.24	432.761	865.001
3	1	0	9	190	802	641	[787,626,825,657]					538.509	245.119	255.045	500.164	482.846	494.764	977.61
3	1	0	9	191	761	653	[711,624,789,687]					918.25	258.408	280.574	538.982	524.358	541.25	1065.61
3	1	0	9	192	847	642	[823,625,884,667]					986.457	238.837	265.146	503.983	451.002	474.311	925.313
3	1	0	9	193	908	650	[870,633,924,661]					518.16	225.755	232.25	458.005	448.756	443.32	892.076
3	1	0	9	194	200	665	[148,632,253,696]					498.101	227.424	246.45	473.874	480.575	493.698	974.273
3	1	0	9	195	627	643	[606,607,686,690]					645.312	261.1	269.8	530.9	533.926	551.656	1085.58
3	1	0	9	196	992	683	[977,636,1010,702]					599.878	212.362	230.78	443.142	402.223	412	814.223
3	1	0	9	197	530	636	[488,594,562,669]					984.829	264.034	283.721	547.755	530.764	575.928	1106.69
3	1	0	9	198	717	689	[677,638,757,740]					960.708	257.056	279.523	536.579	553.534	535.611	1089.14
3	1	0	9	199	970	658	[949,641,988,702]					936.324	217.834	244.417	462.251	424.29	449.604	873.894
3	1	0	9	200	1072	662	[1065,653,1078,670]					611.267	201.904	199.481	401.385	4987.03	3492.91	8479.94
3	1	0	9	201	414	676	[370,640,449,725]					619.203	257.775	272.217	529.992	542.086	578.252	1120.34
3	1	0	9	202	455	660	[436,639,480,684]					876.616	268.393	295.132	563.525	563.375	560.742	1124.12
3	1	0	9	203	117	666	[65,628,164,712]					473.93	216.863	230.17	447.033	407.773	412.09	819.863
3	1	0	9	204	302	661	[249,637,339,694]					857.318	248.677	277.146	525.823	484.705	503.596	988.301
3	1	0	9	205	545	675	[504,654,561,701]					711.298	264.469	287.436	551.905	515.01	533.085	1048.1
3	1	0	9	206	496	666	[417,635,522,723]					864.506	270.516	355.713	626.229	539.992	551.927	1091.92
3	1	0	9	207	843	675	[820,657,872,689]					700.904	243.196	265.963	509.159	444.702	454.622	899.324
3	1	0	9	208	1020	667	[998,646,1040,700]					613.174	210.499	222.483	432.982	380.254	368.765	749.019
3	1	0	9	209	793	673	[760,642,827,696]					785.39	258.055	274.837	532.892	491.809	526.024	1017.83
3	1	0	9	210	584	680	[545,640,618,719]					575.26	263.532	288.125	551.657	513.747	535.26	1049.01
3	1	0	9	211	868	689	[840,650,907,716]					697.901	251.007	346.15	597.157	457.859	555.927	1013.79
3	1	0	9	212	635	683	[614,662,671,718]					767.535	263.195	283.028	546.223	593.185	529.303	1122.49
3	1	0	9	213	818	695	[796,682,842,713]					523.937	296.107	422.282	718.389	1160.9	3424.95	4585.85
3	1	0	9	214	287	699	[216,659,307,724]					545.549	244.412	265.462	509.874	485.216	487.451	972.667
3	1	0	9	215	918	681	[889,651,969,719]					608.855	231.953	256.932	488.885	440.693	454.179	894.872
3	1	0	9	216	524	695	[482,680,547,738]					546.66	261.559	273.567	535.126	523.016	542.093	1065.11
3	1	0	9	217	242	698	[207,670,269,718]					758.641	237.805	261.25	499.055	495.524	519.558	1015.08
3	1	0	9	218	349	693	[304,661,381,723]					780.718	256.647	290.537	547.184	504.669	499.277	1003.95
3	1	0	9	219	471	736	[445,690,509,788]					683.541	261.804	277.191	538.995	509.11	525.892	1035
3	1	0	9	220	899	715	[877,697,920,750]					505.818	231.664	258.006	489.67	424.162	429.377	853.539
3	1	0	9	221	843	720	[804,698,871,739]					833.736	246.752	265.141	511.893	453.026	470.261	923.287
3	1	0	9	222	621	712	[600,696,642,740]					946.288	263.211	276.755	539.966	523.383	545.799	1069.18
3	1	0	9	223	675	720	[638,680,704,752]					714.391	260.24	287.789	548.029	503.573	507.807	1011.38
3	1	0	9	224	195	712	[145,681,242,751]					469.255	230.378	247.578	477.956	472.544	497.157	969.701
3	1	0	9	225	1053	718	[1045,712,1068,731]					519.123	199.969	200.918	400.887	355.561	361.746	717.307
3	1	0	9	226	81	754	[16,683,164,815]					527.713	215.262	241.307	456.569	400.151	433.218	833.369
3	1	0	9	227	776	717	[743,686,809,751]					847.069	254.065	281.147	535.212	507.218	524.539	1031.76
3	1	0	9	228	650	725	[638,711,657,740]					746.467	264.225	276.544	540.769	501.969	508.4	1010.37
3	1	0	9	229	1006	725	[989,709,1024,740]					631.22	213.815	237.536	451.351	380.293	384.19	764.483
3	1	0	9	230	949	725	[917,689,1000,768]					709.361	232.458	255.508	487.966	493.986	426.066	920.052
3	1	0	9	231	533	732	[503,706,562,757]					732.769	261.762	279.704	541.466	512.492	515.421	1027.91
3	1	0	9	232	263	765	[169,709,367,851]					523.678	246.347	260.894	507.241	484.313	489.65	973.963
3	1	0	9	233	584	723	[563,697,610,749]					524.811	263.12	274.179	537.299	505.758	512.934	1018.69
3	1	0	9	234	612	750	[574,720,644,784]					770.419	265.638	293.872	559.51	508.131	571.797	1079.93
3	1	0	9	235	906	744	[896,729,930,779]					702.364	230.124	235.225	465.349	418.41	423.827	842.237
3	1	0	9	236	182	747	[92,731,221,804]					528.264	227.242	238.604	465.846	419.91	444.915	864.825
3	1	0	9	237	1033	747	[1001,720,1052,779]					601.491	206.653	221.032	427.685	367.245	371.288	738.533
3	1	0	9	238	417	737	[383,714,481,777]					758.669	260.826	288.339	549.165	515.089	503	1018.09
3	1	0	9	239	777	780	[731,726,825,829]					596.426	252.812	266.837	519.649	480.32	523.194	1003.51
3	1	0	9	240	536	781	[496,718,585,824]					536.64	260.874	280.37	541.244	502.452	525	1027.45
3	1	0	9	241	652	788	[623,744,710,819]					598.485	257.305	277.667	534.972	508.243	545.202	1053.44
3	1	0	9	242	838	770	[806,735,868,795]					796.698	296.035	337.047	633.082	1297.11	1589.52	2886.63
3	1	0	9	243	376	762	[288,717,413,816]					583.186	253.387	271.333	524.72	506.943	530.391	1037.33
3	1	0	9	244	707	757	[670,729,748,789]					1125.88	257.167	293.725	550.892	515.525	545.79	1061.32
3	1	0	9	245	991	776	[958,759,1027,799]					547.571	208.97	224.881	433.851	365.142	366.302	731.444
3	1	0	9	246	942	769	[916,747,970,808]					605.777	218.432	236.883	455.315	406.717	416.087	822.804
3	1	0	9	247	410	811	[378,763,436,854]					800.327	257.614	278.694	536.308	492.138	500.235	992.373
3	1	0	9	248	435	777	[425,767,444,790]					480.204	262.769	266.677	529.446	659.96	829.978	1489.94
3	1	0	9	249	466	790	[428,769,510,826]					553.719	258.099	268	526.099	496.635	516.75	1013.38
3	1	0	9	250	957	794	[944,775,970,818]					493.056	214.507	226.144	440.651	387.776	393.622	781.398
3	1	0	9	251	564	827	[532,776,630,854]					510.411	261.356	281.302	542.658	509.138	524.961	1034.1
3	1	0	9	252	163	794	[126,771,204,831]					585.067	225.802	237.095	462.897	410.671	434.724	845.395
3	1	0	9	253	618	827	[585,791,669,867]					714.861	259.195	284.639	543.834	502.893	537.593	1040.49
3	1	0	9	254	899	800	[865,778,921,823]					519.879	225.695	244.705	470.4	413.877	413	826.877
3	1	0	9	255	984	814	[960,782,1016,841]					605.303	208.908	226.459	435.367	375.853	379.443	755.296
3	1	0	9	256	933	813	[918,799,950,825]					440.861	219.632	237.842	457.474	399.859	406.109	805.968
3	1	0	9	257	287	839	[206,794,395,896]					838.673	247.465	288.832	536.297	469.005	492.636	961.641
3	1	0	9	258	106	841	[43,799,227,889]					515.613	221.809	237.838	459.647	402.662	420.423	823.085
3	1	0	9	259	1054	826	[1045,814,1065,833]					616.917	209.371	214.71	424.081	351.447	355.314	706.761
3	1	0	9	260	685	825	[664,807,712,843]					777.699	257.826	290.559	548.385	502.327	529.925	1032.25
3	1	0	9	261	743	819	[701,774,795,866]					629.697	253.988	268.639	522.627	491.968	522.107	1014.08
3	1	0	9	262	1019	835	[1000,819,1033,848]					691.279	206.621	217.856	424.477	364.918	360.054	724.972
3	1	0	9	263	931	847	[894,813,998,875]					738.138	217.53	254.745	472.275	400.515	410.282	810.797
3	1	0	9	264	444	843	[398,803,476,897]					726.945	257.385	273.205	530.59	533.663	544.843	1078.51
3	1	0	9	265	500	867	[447,804,543,941]					805	257.248	281.333	538.581	500.005	535.686	1035.69
3	1	0	9	266	706	846	[695,838,728,862]					878.541	264.037	284.122	548.159	498.264	506.704	1004.97
3	1	0	9	267	882	855	[858,827,974,896]					561.875	225.369	247.191	472.56	403.105	418.287	821.392
3	1	0	9	268	666	847	[640,829,699,873]					668.576	256.61	271.968	528.578	484.817	463.128	947.945
3	1	0	9	269	713	870	[692,854,744,909]					768.485	255.334	285.04	540.374	463.91	475.051	938.961
3	1	0	9	270	838	901	[737,825,941,972]					631.707	240.649	280.488	521.137	427.103	463.967	891.07
3	1	0	9	271	992	867	[980,852,1004,891]					537.931	207.866	220.396	428.262	377.551	393.277	770.828
3	1	0	9	272	700	888	[670,866,722,901]					587.626	257.644	269.615	527.259	456.388	459.154	915.542
3	1	0	9	273	622	884	[570,841,655,915]					665.021	255.631	276.745	532.376	493.902	512.021	1005.92
3	1	0	9	274	667	892	[642,865,692,910]					567.674	266.191	309.979	576.17	519.738	726.821	1246.56
3	1	0	9	275	321	908	[224,846,455,960]					527.068	246.971	262.34	509.311	473.771	490.476	964.247
3	1	0	9	276	563	898	[527,847,618,941]					648.52	260.959	282.332	543.291	490.68	475.469	966.149
3	1	0	9	277	1071	902	[1065,895,1078,910]					520.614	195.725	196.316	392.041	314.283	310.904	625.187
3	1	0	9	278	974	906	[937,884,1001,933]					758.217	209.036	234.958	443.994	370.296	387.646	757.942
3	1	0	9	279	1026	900	[999,891,1040,914]					484.834	203.66	212.321	415.981	341.773	339.632	681.405
3	1	0	9	280	637	925	[602,906,685,988]					639.957	252.548	284.319	536.867	466.871	475.809	942.68
3	1	0	9	281	1005	928	[992,920,1011,951]					538.302	206.028	211.025	417.053	344.763	346.364	691.127
3	1	0	9	282	701	915	[674,896,739,941]					473.826	253.581	262.011	515.592	463.92	456.141	920.061
3	1	0	9	283	755	1003	[682,915,813,1076]					573.368	239.174	268.802	507.976	417.439	446.406	863.845
3	1	0	9	284	153	913	[87,864,230,975]					372.796	227.951	230.935	458.886	417.17	411.528	828.698
3	1	0	9	285	1053	936	[1044,928,1059,954]					476.256	204.433	205.238	409.671	319.323	319.494	638.817
3	1	0	9	286	958	946	[926,924,990,985]					547.033	206.66	219.527	426.187	364.617	374.693	739.31
3	1	0	9	287	532	959	[483,913,572,1054]					758.653	251.77	274.832	526.602	469.37	491.455	960.825
3	1	0	9	288	397	935	[347,909,435,998]					466.653	249.688	264.322	514.01	485.355	505.702	991.057
3	1	0	9	289	446	1016	[362,911,497,1078]					383.154	243.977	256.824	500.801	451.172	535.56	986.732
3	1	0	9	290	1047	962	[1039,953,1055,972]					341.78	209.16	207.984	417.144	320.03	315.961	635.991
3	1	0	9	291	673	989	[612,935,711,1037]					484.176	247.067	288.986	536.053	440.283	469.804	910.087
3	1	0	9	292	809	964	[783,921,855,1043]					505.775	231.363	259.27	490.633	394.934	412.472	807.406
3	1	0	9	293	905	969	[879,946,947,998]					545.684	210.674	229.447	440.121	372.496	396.877	769.373
3	1	0	9	294	251	1005	[161,906,330,1078]					355.966	229.455	240.341	469.796	433.086	464.057	897.143
3	1	0	9	295	175	978	[159,964,197,1009]					493.131	218.384	234.616	453	401.955	420.576	822.531
3	1	0	9	296	350	1030	[298,944,408,1078]					396.563	234.569	258.656	493.225	444.737	468.047	912.784
3	1	0	9	297	584	1009	[542,933,650,1078]					567.73	244.05	268.961	513.011	442.813	463.112	905.925
3	1	0	9	298	996	974	[971,962,1009,987]					630.208	220.11	239.058	459.168	336.216	328.977	665.193
3	1	0	9	299	126	988	[112,973,142,998]					335.619	282.834	222.746	505.58	1355.84	483.508	1839.35
3	1	0	9	300	1026	995	[1010,986,1036,1002]					451.15	206.368	212.267	418.635	314.349	309.467	623.816
3	1	0	9	301	1050	990	[1044,982,1057,1006]					434.879	215.295	196.424	411.719	457.638	318.384	776.022
3	1	0	9	302	870	990	[841,961,896,1053]					427.426	218.757	237.113	455.87	368.495	378.765	747.26
3	1	0	9	303	894	1018	[875,989,920,1035]					446.952	211.387	226.752	438.139	360.725	371.807	732.532
3	1	0	9	304	933	1011	[900,987,954,1040]					371.787	208.44	218.708	427.148	352.041	372.303	724.344
3	1	0	9	305	982	1004	[948,977,998,1020]					391.368	202.872	212.386	415.258	329.031	323.526	652.557
3	1	0	9	306	1044	1034	[1038,1019,1054,1039]					410.911	191.173	191.173	382.346	302.208	302.208	604.416
3	1	0	9	307	537	1043	[476,1003,570,1078]					614.935	239.61	264.13	503.74	459.878	468.675	928.553
3	1	0	9	308	1008	1034	[1002,1024,1015,1046]					382.917	199.867	199.258	399.125	308.48	309.53	618.01
3	1	0	9	309	839	1057	[808,1026,878,1078]					469.908	213.732	226.679	440.411	359.728	387.798	747.526
3	1	0	9	310	1072	1045	[1068,1041,1078,1053]					374.625	169.357	169.357	338.714	309.161	309.161	618.322
3	1	0	9	311	796	1059	[766,1034,823,1078]					406.185	219.224	231.782	451.006	380.355	383.134	763.489
3	1	0	9	312	707	1057	[680,1032,742,1078]					436.421	228.454	249.944	478.398	403.1	417.151	820.251
3	1	0	9	313	900	1048	[889,1031,931,1074]					359.874	206.252	216.807	423.059	334.428	333.748	668.176
3	1	0	9	314	668	1035	[637,1024,688,1078]					508.407	236.655	251.541	488.196	419.591	421.971	841.562
3	1	0	9	315	657	1061	[645,1038,670,1078]					392.633	232.426	239.257	471.683	397.626	398.165	795.791
3	1	0	9	316	1018	1054	[1012,1048,1038,1066]					337.45	193.749	194.53	388.279	296.692	298.396	595.088
3	1	0	9	317	998	1063	[989,1056,1011,1070]					404.551	201.358	201.354	402.712	315.294	316.994	632.288
3	1	0	9	318	760	1068	[744,1049,772,1078]					394.238	218.737	223.619	442.356	369.42	378.029	747.449
3	1	0	9	319	451	1068	[420,1061,461,1078]					523	232.39	242.879	475.269	434.31	468.527	902.837
3	1	0	10	1	666	104	[527,1,958,207]					490.47	225.777	232.894	458.671	437.596	459.402	896.998
3	1	0	10	2	385	212	[112,1,601,452]					497.684	239.407	258.5	497.907	463.087	483.265	946.352
3	1	0	10	3	749	365	[570,193,988,561]					634.344	241.911	259.677	501.588	483.877	494.86	978.737
3	1	0	10	4	991	425	[948,315,1030,512]					539.567	208.519	232.392	440.911	388.43	434.258	822.688
3	1	0	10	5	1017	497	[994,473,1047,536]					541.893	206.585	225.179	431.764	387.268	408.411	795.679
3	1	0	10	6	897	484	[789,382,967,552]					581.66	225.776	230.528	456.304	494.875	560.028	1054.9
3	1	0	10	7	976	537	[942,510,1035,601]					734.444	235.036	239.66	474.696	935.986	596.593	1532.58
3	1	0	10	8	232	500	[80,382,597,665]					585.057	242.76	255.352	498.112	489.084	472.92	962.004
3	1	0	10	9	1008	581	[988,547,1042,602]					518.228	207.319	216.673	423.992	442.081	508.485	950.566
3	1	0	10	10	934	616	[909,559,963,654]					8943.7	847.108	775.622	1622.73	50666.1	60919.6	111586
3	1	0	10	11	940	648	[900,619,966,709]					9789.86	1080.94	1327.06	2408	51837.9	63752.8	115591
3	1	0	10	12	303	800	[55,580,577,983]					1473.71	240.04	284.311	524.351	461.98	491.815	953.795
3	1	0	10	13	771	815	[577,602,1003,1062]					552.137	240.315	250.647	490.962	480.064	547.255	1027.32
3	1	0	11	1	398	69	[255,1,549,205]					221.277	228.819	222.404	451.223	397.621	372.564	770.185
3	1	0	11	2	868	126	[653,1,1078,251]					265.073	204.073	194.691	398.764	358.003	361.8	719.803
3	1	0	11	3	256	56	[246,49,265,65]					742.87	240.552	241.14	481.692	419.925	422.021	841.946
3	1	0	11	4	182	60	[90,1,396,253]					434.183	216.006	223.183	439.189	381.601	378.385	759.986
3	1	0	11	5	240	93	[223,59,255,111]					586.622	225.106	233.383	458.489	394.049	396.289	790.338
3	1	0	11	6	286	90	[248,49,429,208]					486.744	232.256	234.335	466.591	409.643	379.843	789.486
3	1	0	11	7	513	118	[447,31,576,266]					225.866	242.456	240.269	482.725	432.194	425.651	857.845
3	1	0	11	8	307	139	[293,128,324,163]					523.664	236.809	240.769	477.578	424.586	426.963	851.549
3	1	0	11	9	92	158	[1,1,343,313]					228.143	208.116	202.552	410.668	401.902	390.61	792.512
3	1	0	11	10	102	355	[1,237,309,502]					328.416	213.936	198.432	412.368	432.304	380.744	813.048
3	1	0	11	11	210	290	[169,271,231,313]					255.886	231.15	229.648	460.798	465.343	472.602	937.945
3	1	0	11	12	822	414	[765,356,933,460]					422.563	232.417	230.616	463.033	460.935	455.265	916.2
3	1	0	11	13	975	320	[738,199,1078,555]					253.062	211.297	203.721	415.018	393.988	381.395	775.383
3	1	0	11	14	948	430	[923,417,966,444]					578.467	221.693	234.567	456.26	412.46	431.678	844.138
3	1	0	11	15	137	461	[110,438,176,484]					439.579	224.36	233.323	457.683	493.178	495.414	988.592
3	1	0	11	16	615	528	[604,515,637,545]					248.98	261.645	264.351	525.996	485.389	486.14	971.529
3	1	0	11	17	1025	501	[848,464,1078,554]					398.861	208.322	216.528	424.85	394.46	389.556	784.016
3	1	0	11	18	405	547	[389,536,416,566]					256.696	263.679	263.679	527.358	475.237	475.237	950.474
3	1	0	11	19	422	545	[415,538,430,560]					279.544	265.909	265.909	531.818	480.492	480.492	960.984
3	1	0	11	20	858	594	[771,518,1078,659]					346.871	221.188	206.119	427.307	510.582	387.782	898.364
3	1	0	11	21	373	570	[340,552,405,595]					234.252	255.161	259.283	514.444	466.049	468.685	934.734
3	1	0	11	22	517	558	[494,547,529,573]					246.137	252.987	254.746	507.733	474.848	478.306	953.154
3	1	0	11	23	486	564	[470,556,496,571]					285.324	253.76	253.76	507.52	476.644	476.644	953.288
3	1	0	11	24	479	577	[448,569,494,598]					251.12	253.685	253.685	507.37	473.154	473.154	946.308
3	1	0	11	25	505	577	[496,570,516,594]					328.394	249.533	249.823	499.356	472.714	473.004	945.718
3	1	0	11	26	513	596	[496,571,526,626]					270.917	253.18	255.578	508.758	475.057	472.443	947.5
3	1	0	11	27	1064	588	[1046,563,1078,612]					285.709	182.301	188.891	371.192	351.854	361.591	713.445
3	1	0	11	28	963	726	[789,570,1078,896]					425.034	205.098	210.041	415.139	434.289	486.116	920.405
3	1	0	11	29	463	598	[445,589,478,609]					238.101	254.581	254.581	509.162	481.077	481.077	962.154
3	1	0	11	30	415	627	[406,615,429,641]					231.957	251.838	253.029	504.867	471.033	467.52	938.553
3	1	0	11	31	373	613	[332,596,389,681]					261.108	245.964	247.108	493.072	463.427	460.7	924.127
3	1	0	11	32	138	624	[1,485,299,839]					458.111	218.484	218.253	436.737	424.051	442.535	866.586
3	1	0	11	33	236	767	[159,711,376,824]					251.11	237.609	234.037	471.646	441.892	433.521	875.413
3	1	0	11	34	333	826	[284,783,400,876]					468.614	246.947	250.208	497.155	451.966	459.574	911.54
3	1	0	11	35	296	941	[230,819,419,1011]					247.806	239.12	229.646	468.766	425.451	410.59	836.041
3	1	0	11	36	632	1002	[522,912,726,1078]					285.27	240.871	241	481.871	426.998	424.063	851.061
3	1	0	11	37	154	993	[55,821,388,1078]					274.912	218.325	205.143	423.468	376.057	327.846	703.903
3	1	0	11	38	46	888	[1,801,173,1050]					266.853	206.556	188.908	395.464	361.764	314.624	676.388
3	1	0	11	39	42	1053	[1,1017,72,1078]					180.653	184.504	186.802	371.306	314.403	317.812	632.215
3	1	0	11	40	485	976	[399,884,630,1078]					242.302	240.786	238.318	479.104	423.974	396.419	820.393
3	1	0	11	41	785	352	[670,310,860,445]					270.968	243.491	236.143	479.634	453.379	455.175	908.554
3	1	0	11	42	589	365	[579,355,607,380]					239.528	264.176	264.912	529.088	475.513	475.342	950.855
3	1	0	11	43	528	464	[501,447,552,486]					243.328	259.611	260.621	520.232	473.076	472.735	945.811
3	1	0	11	44	458	522	[427,474,500,548]					257.709	257.939	260.701	518.64	485.848	485.267	971.115
3	1	0	11	45	472	547	[448,522,536,570]					301.079	255.063	256.548	511.611	478.334	477.985	956.319
3	1	0	11	46	433	559	[419,546,448,582]					271.929	258.879	260.164	519.043	481.07	481.675	962.745
3	1	0	11	47	454	571	[426,551,466,603]					236.928	254.755	255.276	510.031	485.978	491.043	977.021
3	1	0	11	48	664	558	[590,512,718,663]					236.189	251.506	255.155	506.661	468.349	474.978	943.327
3	1	0	11	49	540	585	[511,551,569,665]					246.437	254.473	257.975	512.448	480.422	478.317	958.739
3	1	0	11	50	751	577	[672,488,794,645]					240.055	248.566	248.03	496.596	462.499	457.483	919.982
3	1	0	11	51	489	594	[469,574,503,622]					318.539	252.996	254.157	507.153	476.351	477.054	953.405
3	1	0	11	52	562	638	[545,585,614,661]					239.724	257.52	261.06	518.58	479.612	483.43	963.042
3	1	0	11	53	425	610	[387,582,447,632]					239.644	251.562	253.037	504.599	468.562	474.523	943.085
3	1	0	11	54	459	621	[441,606,493,671]					234.281	253.083	253.982	507.065	481.949	476.022	957.971
3	1	0	11	55	417	676	[371,611,480,740]					240.481	250.762	252.685	503.447	474.362	480.434	954.796
3	1	0	11	56	480	748	[457,710,522,770]					245.23	253.334	256.615	509.949	483.973	475.256	959.229
3	1	0	11	57	328	677	[280,594,435,755]					246.376	245.221	242.433	487.654	463.176	455.628	918.804
3	1	0	12	1	366	140	[196,1,570,280]					419.058	232.655	245.328	477.983	432.89	444.496	877.386
3	1	0	12	2	666	138	[520,1,886,282]					429.568	235.386	247.705	483.091	441.855	468.193	910.048
3	1	0	12	3	690	430	[523,266,887,649]					641.909	255.498	267.193	522.691	514.286	506.534	1020.82
3	1	0	12	4	469	520	[355,278,591,625]					374.981	257.291	265.114	522.405	513.707	509.676	1023.38
3	1	0	12	5	244	485	[51,169,402,625]					538.421	230.894	254.174	485.068	478.832	937.099	1415.93
3	1	0	12	6	839	749	[680,531,1027,1073]					305.51	229.64	226.931	456.571	511.179	445.088	956.267
3	1	0	12	7	178	857	[20,613,311,1076]					340.44	224.437	232.59	457.027	576.135	497.08	1073.21
3	1	0	12	8	511	702	[351,607,623,862]					9010.55	275.053	709.02	984.073	3110.24	65369.4	68479.6
3	1	0	12	9	479	859	[383,735,681,923]					10538.9	273.468	864.542	1138.01	2924.02	65139.2	68063.2
3	1	0	13	1	802	37	[757,1,857,107]					625.99	214.785	241.63	456.415	404.959	801.19	1206.15
3	1	0	13	2	1073	404	[1069,398,1078,412]					520.714	180.695	180.695	361.39	331.943	331.943	663.886
3	1	0	13	3	834	561	[814,535,870,591]					536.662	237.357	248.816	486.173	471.614	473.896	945.51
3	1	0	13	4	788	557	[748,530,827,608]					833.173	246.455	262.756	509.211	489.091	500.732	989.823
3	1	0	13	5	704	432	[410,281,960,643]					1031.89	252.385	273.05	525.435	482.607	530.595	1013.2
3	1	0	13	6	919	597	[875,574,1003,631]					619.183	219.36	250.032	469.392	438.002	459.925	897.927
3	1	0	13	7	906	655	[892,637,915,668]					586.571	232.606	246.527	479.133	450.475	465.769	916.244
3	1	0	13	8	888	655	[878,645,899,669]					551.088	233.816	243.769	477.585	461.837	468.352	930.189
3	1	0	13	9	963	630	[909,602,1039,687]					627.939	213.29	235.768	449.058	409.441	435.263	844.704
3	1	0	13	10	700	705	[484,596,965,790]					647.195	250.68	264.681	515.361	485.211	503.345	988.556
3	1	0	13	11	956	676	[942,649,1025,708]					598.538	213.772	219.899	433.671	401.454	405.193	806.647
3	1	0	13	12	987	693	[968,665,1011,715]					581.354	209.509	223.198	432.707	392.503	404.729	797.232
3	1	0	13	13	1022	719	[1006,663,1040,755]					519.525	204.64	218.41	423.05	404.192	493.025	897.217
3	1	0	13	14	770	758	[744,720,964,844]					649.2	237.107	256.337	493.444	461.732	492.726	954.458
3	1	0	13	15	965	759	[883,711,1014,827]					738.188	213.685	237.675	451.36	394.619	441.087	835.706
3	1	0	13	16	841	810	[801,772,898,848]					513.978	234.678	254.425	489.103	441.509	451.385	892.894
3	1	0	13	17	921	790	[898,773,957,826]					493.113	220.092	230.258	450.35	404.562	411.403	815.965
3	1	0	13	18	381	764	[198,630,525,917]					518.463	251.362	270.942	522.304	503.197	937.446	1440.64
3	1	0	13	19	424	895	[248,853,492,985]					884.674	247.639	287.904	535.543	499.597	2068.95	2568.55
3	1	0	13	20	448	979	[305,844,549,1069]					1326.52	252.716	623.16	875.876	1725.39	41648.9	43374.3
3	1	0	13	21	554	888	[510,706,665,959]					9939.79	293.112	623.116	916.228	7163.87	50445.1	57609
3	1	0	13	22	509	914	[498,904,524,938]					1121.18	295.761	351.949	647.71	14702.4	34075.9	48778.3
3	1	0	13	23	695	869	[589,761,827,1033]					6990.53	260.452	313.787	574.239	4480.1	42420.4	46900.5
3	1	0	13	24	818	928	[799,915,845,950]					558.5	234.178	249.078	483.256	435.79	449.804	885.594
3	1	0	13	25	829	1026	[713,913,914,1078]					495.27	224.556	254.303	478.859	443.191	698.663	1141.85
3	1	0	13	26	835	958	[775,927,936,1000]					819.438	222.703	255.277	477.98	419.423	440.657	860.08
3	1	0	13	27	709	1038	[665,959,779,1078]					469.202	227.444	242.092	469.536	428.559	534.486	963.045
3	1	0	14	1	53	7	[47,1,64,14]					550.122	197.797	198.52	396.317	295.876	296.162	592.038
3	1	0	14	2	111	5	[106,1,116,11]					580.179	203.4	203.4	406.8	304.274	304.274	608.548
3	1	0	14	3	211	13	[187,1,254,32]					486.547	204.476	215.916	420.392	347.942	350.263	698.205
3	1	0	14	4	699	11	[679,1,738,24]					472.831	220.012	230.47	450.482	382.782	383.843	766.625
3	1	0	14	5	613	14	[592,1,636,36]					539.383	225.291	235.696	460.987	393.745	398.539	792.284
3	1	0	14	6	766	14	[733,1,786,30]					373.314	213.631	218.924	432.555	384.168	381.085	765.253
3	1	0	14	7	372	21	[333,1,401,66]					643.299	219.101	241.09	460.191	388.882	408.149	797.031
3	1	0	14	8	649	18	[627,1,681,40]					536.236	223.037	243.169	466.206	393.326	407.337	800.663
3	1	0	14	9	135	30	[123,21,153,41]					415.946	199.085	200.554	399.639	334.02	335.813	669.833
3	1	0	14	10	683	27	[667,4,736,46]					428.73	221.38	236.65	458.03	393.034	403.16	796.194
3	1	0	14	11	759	37	[732,15,780,56]					643.796	218.397	233.876	452.273	394.337	408.965	803.302
3	1	0	14	12	500	30	[454,1,546,65]					231.449	225.856	234.876	460.732	399.481	405.787	805.268
3	1	0	14	13	676	54	[634,33,715,75]					503.495	226.248	239.378	465.626	410.665	424.829	835.494
3	1	0	14	14	243	38	[196,7,271,98]					419.574	206.357	221.603	427.96	368.451	384.22	752.671
3	1	0	14	15	732	55	[713,35,768,79]					510.464	221.78	238.455	460.235	403.709	410.455	814.164
3	1	0	14	16	26	65	[21,59,39,75]					595.557	189.411	189.287	378.698	324.495	324.598	649.093
3	1	0	14	17	605	56	[557,1,643,90]					675.085	230.14	255.091	485.231	412.782	436.396	849.178
3	1	0	14	18	434	52	[391,1,482,102]					679.156	224.212	240.378	464.59	411.944	437.289	849.233
3	1	0	14	19	561	47	[495,1,583,93]					809.779	232.24	261.727	493.967	422.404	443.346	865.75
3	1	0	14	20	641	76	[615,63,657,93]					560.306	234.069	250.509	484.578	423.028	426.139	849.167
3	1	0	14	21	865	38	[822,1,911,118]					516.634	208.17	225.787	433.957	367.555	378.14	745.695
3	1	0	14	22	138	87	[121,71,164,106]					389.72	200.634	207.763	408.397	347.357	359.828	707.185
3	1	0	14	23	891	105	[861,55,916,131]					379.082	210.243	222.732	432.975	357.783	374.567	732.35
3	1	0	14	24	679	94	[648,68,709,124]					659.251	232.727	248.803	481.53	428.78	434.158	862.938
3	1	0	14	25	480	96	[448,52,582,131]					634.603	235.985	251.421	487.406	448.329	455.23	903.559
3	1	0	14	26	628	101	[606,88,649,117]					633.264	240.779	258.05	498.829	448.426	461.339	909.765
3	1	0	14	27	133	111	[119,96,145,125]					340.725	201.915	205.912	407.827	351.899	356.022	707.921
3	1	0	14	28	332	75	[263,1,368,120]					574.33	218.48	240.165	458.645	390.057	409.473	799.53
3	1	0	14	29	383	96	[347,47,414,128]					649.726	228.459	252.755	481.214	430.163	445.585	875.748
3	1	0	14	30	267	87	[177,37,306,133]					482.731	213.99	234.278	448.268	389.356	392.639	781.995
3	1	0	14	31	614	119	[597,98,633,136]					627.228	243.385	258.812	502.197	452.064	463.931	915.995
3	1	0	14	32	746	103	[702,2,843,147]					466.955	222.083	246.834	468.917	410.23	451.433	861.663
3	1	0	14	33	77	126	[66,112,105,159]					502.326	200.536	207.153	407.689	346.731	352.097	698.828
3	1	0	14	34	853	127	[829,108,963,169]					399.074	214.458	216.723	431.181	371.058	382.745	753.803
3	1	0	14	35	775	127	[750,80,839,146]					541.669	222.592	239.041	461.633	413.814	427.058	840.872
3	1	0	14	36	638	138	[609,90,672,170]					718.061	243.223	267.827	511.05	455.77	465.015	920.785
3	1	0	14	37	933	114	[897,72,972,150]					475.366	204.928	216.145	421.073	345.455	371.023	716.478
3	1	0	14	38	338	131	[327,112,353,148]					488.784	227.152	234.432	461.584	433.543	451.414	884.957
3	1	0	14	39	580	127	[526,74,619,161]					767.863	241.481	272.49	513.971	448.441	456.853	905.294
3	1	0	14	40	149	127	[132,99,171,149]					473.645	206.096	211.373	417.469	374.485	381.164	755.649
3	1	0	14	41	118	132	[94,120,134,158]					474.67	203.043	204.835	407.878	358.861	365.196	724.057
3	1	0	14	42	707	137	[683,112,729,165]					842.232	242.014	264.536	506.55	451.318	465.624	916.942
3	1	0	14	43	359	141	[224,109,392,181]					542.586	227.74	247.737	475.477	441.684	450.99	892.674
3	1	0	14	44	746	147	[728,134,768,168]					767.399	241.855	268.783	510.638	440.927	436.304	877.231
3	1	0	14	45	1063	151	[1052,143,1072,163]					279.005	192.805	192.174	384.979	309.699	309.174	618.873
3	1	0	14	46	242	141	[165,92,312,162]					496.971	219.588	232.515	452.103	407.148	450.883	858.031
3	1	0	14	47	816	134	[761,115,840,165]					403.642	225.595	243.758	469.353	417.614	429.758	847.372
3	1	0	14	48	664	160	[642,115,704,183]					736.464	242.139	261.891	504.03	457.444	471.609	929.053
3	1	0	14	49	147	167	[96,131,190,191]					529.571	207.499	220.731	428.23	387.233	392.244	779.477
3	1	0	14	50	987	165	[931,145,1018,211]					320.595	202.896	206.559	409.455	340.579	357.865	698.444
3	1	0	14	51	706	170	[691,157,721,194]					606.177	242.981	252.571	495.552	464.28	456.837	921.117
3	1	0	14	52	776	180	[728,159,804,205]					642.167	234.466	257.625	492.091	447.216	471.569	918.785
3	1	0	14	53	642	188	[626,174,668,205]					917.466	252.308	277.672	529.98	461.076	458.687	919.763
3	1	0	14	54	545	167	[504,130,593,201]					787.359	245.711	272.258	517.969	558.786	501.297	1060.08
3	1	0	14	55	1071	195	[1054,187,1078,205]					528.836	189.516	188.4	377.916	297.453	297.996	595.449
3	1	0	14	56	140	207	[72,180,172,252]					480.594	206.254	216.914	423.168	393.353	397.445	790.798
3	1	0	14	57	722	192	[708,156,746,210]					838.392	241.698	258.289	499.987	460.869	469.866	930.735
3	1	0	14	58	618	178	[593,159,657,217]					682.333	251.464	268.983	520.447	468.403	470.533	938.936
3	1	0	14	59	11	204	[2,197,18,214]					522.657	203.411	203.793	407.204	346.681	345.993	692.674
3	1	0	14	60	596	191	[573,139,613,214]					813.455	249.586	282.545	532.131	478.328	483.534	961.862
3	1	0	14	61	340	184	[235,158,392,228]					694.062	231.504	249.639	481.143	465.2	507.412	972.612
3	1	0	14	62	863	184	[816,137,939,234]					658.214	220.936	251.482	472.418	389.221	411.643	800.864
3	1	0	14	63	682	198	[660,166,718,228]					797.673	246.644	261.664	508.308	468.678	482.761	951.439
3	1	0	14	64	948	198	[908,175,982,234]					503.826	209.615	222.853	432.468	360.587	384.055	744.642
3	1	0	14	65	639	214	[618,193,662,227]					675.099	253.792	271.342	525.134	475.931	485.027	960.958
3	1	0	14	66	863	239	[819,192,879,254]					538.022	227.96	240.351	468.311	412.588	416.881	829.469
3	1	0	14	67	744	218	[715,150,833,236]					581.901	234.18	253.345	487.525	442.9	463.039	905.939
3	1	0	14	68	416	172	[358,89,472,252]					487.352	240.7	261.049	501.749	467.883	467.336	935.219
3	1	0	14	69	49	233	[38,219,65,247]					481.468	205.841	197.649	403.49	360.63	355.34	715.97
3	1	0	14	70	670	229	[644,206,700,251]					752.108	250.363	272.588	522.951	480.001	488.186	968.187
3	1	0	14	71	556	230	[458,110,601,270]					632.267	248.326	272.661	520.987	490.899	528.115	1019.01
3	1	0	14	72	640	237	[621,225,654,253]					724.358	255.27	264.95	520.22	480.881	489.816	970.697
3	1	0	14	73	972	235	[935,201,1023,270]					640.991	204.233	211.917	416.15	353.274	364.444	717.718
3	1	0	14	74	752	249	[706,224,786,273]					485.894	241.119	255.239	496.358	457.226	467.265	924.491
3	1	0	14	75	613	260	[560,206,653,299]					774.913	257.012	272.984	529.996	490.144	504.905	995.049
3	1	0	14	76	1072	251	[1065,245,1078,260]					532.26	194.264	193.733	387.997	307.486	307.802	615.288
3	1	0	14	77	714	251	[690,230,736,262]					655.795	246.861	252.966	499.827	468.496	466.436	934.932
3	1	0	14	78	822	232	[797,197,855,280]					854.676	231.961	249.457	481.418	438.231	465.301	903.532
3	1	0	14	79	783	264	[761,205,813,287]					681.371	236.136	248.073	484.209	456.55	466.742	923.292
3	1	0	14	80	386	264	[365,243,410,278]					751.638	245.66	257.436	503.096	479.079	471.489	950.568
3	1	0	14	81	703	267	[691,257,737,277]					479.018	248.968	250.699	499.667	467.363	467.159	934.522
3	1	0	14	82	890	258	[856,225,937,283]					530.817	220.626	237.942	458.568	391.818	404.75	796.568
3	1	0	14	83	661	273	[634,242,707,309]					440.101	251.831	252.091	503.922	487.305	499.101	986.406
3	1	0	14	84	715	281	[688,266,748,299]					547.264	246.818	250.057	496.875	477.728	498.321	976.049
3	1	0	14	85	506	272	[455,180,562,314]					781.993	252.848	285.122	537.97	485.691	490.871	976.562
3	1	0	14	86	430	268	[383,243,465,325]					839.58	249.495	276.534	526.029	499.116	532.591	1031.71
3	1	0	14	87	198	242	[118,191,279,308]					711.596	220.953	257.495	478.448	438.185	549.727	987.912
3	1	0	14	88	323	259	[183,156,411,330]					677.955	234.933	274.198	509.131	471.394	662.063	1133.46
3	1	0	14	89	834	281	[803,257,864,326]					328.549	233.261	232.402	465.663	435.854	452.574	888.428
3	1	0	14	90	903	292	[825,254,957,321]					332.089	223.203	234.446	457.649	407.324	447.027	854.351
3	1	0	14	91	806	283	[788,273,827,339]					378.667	238.075	241.055	479.13	452.236	458.588	910.824
3	1	0	14	92	469	299	[433,265,495,327]					809.16	252.77	274.113	526.883	504.299	522.075	1026.37
3	1	0	14	93	693	306	[665,281,744,346]					381.651	249.801	250.527	500.328	498.872	497.704	996.576
3	1	0	14	94	950	289	[860,268,999,333]					490.075	217.141	237.133	454.274	395.141	414.458	809.599
3	1	0	14	95	663	331	[642,303,695,365]					286.702	254.359	252.49	506.849	493.605	488.654	982.259
3	1	0	14	96	722	318	[701,304,738,337]					336.154	250.412	257.205	507.617	476.938	484.368	961.306
3	1	0	14	97	767	299	[722,267,801,349]					531.096	245.66	253.459	499.119	472.217	530.204	1002.42
3	1	0	14	98	477	343	[404,313,505,377]					726.789	256.365	272.555	528.92	510.908	530.846	1041.75
3	1	0	14	99	568	302	[527,274,596,356]					774.461	259.729	288.071	547.8	495.602	505.56	1001.16
3	1	0	14	100	932	355	[882,309,1011,384]					669.357	219.029	248.163	467.192	394.376	422.582	816.958
3	1	0	14	101	1001	361	[962,326,1028,388]					490.347	205.447	215.212	420.659	365.717	389.881	755.598
3	1	0	14	102	842	339	[802,306,888,367]					647.82	234.929	253.627	488.556	442.44	451.366	893.806
3	1	0	14	103	536	347	[501,305,570,367]					571.894	261.217	270.314	531.531	496.627	503.555	1000.18
3	1	0	14	104	80	348	[62,336,112,363]					322.872	201.752	196.011	397.763	404.144	398.117	802.261
3	1	0	14	105	415	368	[335,311,460,419]					616.272	251.737	279.598	531.335	491.646	499.957	991.603
3	1	0	14	106	315	336	[99,270,363,399]					451.424	230.003	251.356	481.359	449.749	470.831	920.58
3	1	0	14	107	811	355	[797,340,826,370]					573.389	242.589	255.947	498.536	446.682	457.968	904.65
3	1	0	14	108	718	354	[683,330,744,378]					440.695	253.564	254.932	508.496	485.984	483.678	969.662
3	1	0	14	109	754	350	[728,340,765,375]					615.738	251.16	261.846	513.006	476.095	486.8	962.895
3	1	0	14	110	616	348	[575,286,653,391]					561.406	258.203	272.147	530.35	501.445	535.168	1036.61
3	1	0	14	111	780	344	[755,299,801,393]					406.587	245.445	248.492	493.937	459.838	462.514	922.352
3	1	0	14	112	215	359	[94,313,308,393]					479.238	227.153	248.248	475.401	456.394	483.545	939.939
3	1	0	14	113	863	373	[824,352,902,396]					826.017	235.231	257.754	492.985	445.655	455.836	901.491
3	1	0	14	114	815	379	[798,361,841,399]					532.543	240.856	249.15	490.006	456.969	458.787	915.756
3	1	0	14	115	48	372	[18,335,70,403]					388.658	202.053	210.015	412.068	397.632	396.612	794.244
3	1	0	14	116	501	383	[451,332,537,410]					966.479	258.308	284.658	542.966	505.392	518.855	1024.25
3	1	0	14	117	791	392	[776,366,820,409]					571.75	245.598	255.75	501.348	458.004	459.258	917.262
3	1	0	14	118	548	385	[525,356,588,431]					819.263	262.736	286.436	549.172	514.231	525.992	1040.22
3	1	0	14	119	714	396	[687,367,771,426]					394.21	251.272	255.673	506.945	487.476	502.827	990.303
3	1	0	14	120	655	379	[619,359,692,423]					418.121	255.104	257.866	512.97	492.232	491.326	983.558
3	1	0	14	121	612	408	[588,374,637,426]					623.504	259.228	267.176	526.404	499.384	503.191	1002.58
3	1	0	14	122	827	399	[820,392,848,410]					446.033	240.471	248.033	488.504	460.754	458.413	919.167
3	1	0	14	123	581	394	[568,381,593,407]					643.674	258.839	264.876	523.715	506.495	509.652	1016.15
3	1	0	14	124	369	406	[296,366,410,460]					662	247.366	270.433	517.799	485.955	497.962	983.917
3	1	0	14	125	991	410	[932,373,1040,483]					583.247	209.47	227.747	437.217	373.912	383.133	757.045
3	1	0	14	126	858	405	[838,387,885,416]					306.705	230.972	234.448	465.42	443.966	444.648	888.614
3	1	0	14	127	76	398	[37,374,102,428]					434.747	205.081	210.769	415.85	410.325	424.033	834.358
3	1	0	14	128	587	414	[556,401,597,427]					736.947	263.781	281.787	545.568	501.913	509.532	1011.44
3	1	0	14	129	774	416	[702,391,799,451]					590.642	250.56	264.725	515.285	472.898	495	967.898
3	1	0	14	130	814	438	[790,403,940,479]					782.96	234.764	261.192	495.956	448.1	471.354	919.454
3	1	0	14	131	670	400	[642,370,696,449]					417.398	256.142	254.114	510.256	499.635	505.761	1005.4
3	1	0	14	132	924	405	[834,377,966,456]					495.426	226.138	248.553	474.691	419.168	451.305	870.473
3	1	0	14	133	681	426	[660,414,715,442]					520.496	258.937	266.248	525.185	496.662	507.955	1004.62
3	1	0	14	134	260	428	[240,413,291,470]					417.4	237.999	239.878	477.877	477.857	472.289	950.146
3	1	0	14	135	298	425	[235,384,348,461]					655.466	241.793	254.136	495.929	477.055	484.068	961.123
3	1	0	14	136	568	436	[526,408,598,455]					883.312	263.678	290.172	553.85	513.833	519.172	1033.01
3	1	0	14	137	184	438	[85,422,201,462]					673.853	228.488	243.832	472.32	530.428	507.474	1037.9
3	1	0	14	138	155	395	[96,352,275,501]					454.31	227.477	254.681	482.158	508.326	700.434	1208.76
3	1	0	14	139	449	421	[405,386,557,486]					843.558	257.174	281.584	538.758	510.233	534.787	1045.02
3	1	0	14	140	758	453	[721,424,820,489]					1089.55	250.866	286.408	537.274	478.338	491.308	969.646
3	1	0	14	141	622	447	[584,419,653,487]					716.402	261.988	288.196	550.184	505.507	523.565	1029.07
3	1	0	14	142	684	450	[640,437,727,471]					988.202	261.078	283.732	544.81	501.392	511.553	1012.94
3	1	0	14	143	568	465	[551,449,589,479]					658	264.394	284.053	548.447	514.858	511.189	1026.05
3	1	0	14	144	121	483	[71,447,218,540]					322.375	218.389	232.705	451.094	460.034	486.273	946.307
3	1	0	14	145	671	473	[647,463,684,489]					911.966	269.178	287.026	556.204	502.774	519.233	1022.01
3	1	0	14	146	700	479	[654,458,757,518]					1084.6	258.491	293.461	551.952	491.674	511.491	1003.16
3	1	0	14	147	335	485	[283,442,368,528]					520.413	246.609	255.976	502.585	495.087	502.802	997.889
3	1	0	14	148	889	486	[790,449,971,518]					855.211	230.371	266.023	496.394	435.412	477.657	913.069
3	1	0	14	149	54	514	[38,489,62,535]					407.524	204.714	206.914	411.628	387.106	378.857	765.963
3	1	0	14	150	632	494	[588,472,663,512]					598.277	262.406	267.386	529.792	508.114	523.119	1031.23
3	1	0	14	151	219	523	[48,484,256,596]					448.748	221.775	237.728	459.503	467.074	490.262	957.336
3	1	0	14	152	570	494	[526,468,595,517]					831.891	266.003	287.226	553.229	512.336	543.073	1055.41
3	1	0	14	153	955	489	[928,473,998,514]					696.898	216.426	236.796	453.222	407.926	410.935	818.861
3	1	0	14	154	999	499	[973,466,1029,528]					678.38	212.937	224.036	436.973	374.785	388.44	763.225
3	1	0	14	155	477	494	[386,430,529,541]					719.916	257.531	279.16	536.691	521.338	517.542	1038.88
3	1	0	14	156	712	519	[692,497,734,540]					892.5	258.32	279.657	537.977	484.338	498.542	982.88
3	1	0	14	157	607	519	[587,502,683,540]					911.274	261.473	271.333	532.806	507.509	523.094	1030.6
3	1	0	14	158	953	523	[917,494,986,542]					758.5	221.275	240.711	461.986	418.898	422.433	841.331
3	1	0	14	159	571	526	[521,492,591,543]					801.917	266.75	291.5	558.25	522.636	539.891	1062.53
3	1	0	14	160	398	493	[351,444,437,550]					831.021	257.491	280.646	538.137	501.689	527.75	1029.44
3	1	0	14	161	894	545	[728,477,941,606]					731.462	238.218	276.623	514.841	451.572	505.462	957.034
3	1	0	14	162	1029	520	[1014,487,1050,543]					472.03	205.628	228.131	433.759	356.37	368.333	724.703
3	1	0	14	163	990	525	[978,511,1014,543]					590.05	216.926	230.99	447.916	398.867	400.77	799.637
3	1	0	14	164	288	517	[249,469,347,559]					662.458	242.111	269.196	511.307	500.14	517.411	1017.55
3	1	0	14	165	554	542	[540,528,576,588]					710.787	262.835	283.056	545.891	529.868	534.713	1064.58
3	1	0	14	166	774	535	[757,523,788,549]					773.876	253.44	279.175	532.615	479.106	491.732	970.838
3	1	0	14	167	532	555	[513,525,560,574]					974.541	266.327	287.86	554.187	529.641	537.779	1067.42
3	1	0	14	168	414	569	[368,534,488,602]					732.749	254.922	274.379	529.301	514.518	539.84	1054.36
3	1	0	14	169	593	554	[569,529,629,601]					946.148	263.394	285.284	548.678	528.251	536.144	1064.39
3	1	0	14	170	1042	543	[1034,537,1049,557]					450.489	202.097	205.152	407.249	358.357	361.207	719.564
3	1	0	14	171	679	553	[650,512,707,584]					656.743	257.261	273.921	531.182	495.7	498.52	994.22
3	1	0	14	172	962	557	[949,537,981,572]					566.16	218.838	233.176	452.014	417.113	434.855	851.968
3	1	0	14	173	354	562	[322,527,382,606]					836.807	246.137	269.687	515.824	499.59	560.66	1060.25
3	1	0	14	174	503	556	[484,534,547,584]					899.081	259.595	269.535	529.13	525.36	527.703	1053.06
3	1	0	14	175	1033	566	[1009,541,1049,579]					492.635	204.883	213.906	418.789	359.226	359.031	718.257
3	1	0	14	176	639	564	[611,534,693,602]					950.854	262.173	283.846	546.019	512.363	525.532	1037.89
3	1	0	14	177	994	568	[919,536,1028,600]					679.316	216.953	239.919	456.872	402.406	422.091	824.497
3	1	0	14	178	243	576	[86,540,295,632]					752.906	225.878	252.669	478.547	468.994	502.394	971.388
3	1	0	14	179	692	578	[680,559,710,591]					667.8	258.111	268.8	526.911	488.73	492.771	981.501
3	1	0	14	180	306	581	[278,544,333,611]					635.27	243.983	263.101	507.084	501.954	500.91	1002.86
3	1	0	14	181	707	576	[701,569,717,588]					847.716	269.539	278.745	548.284	489.526	499.186	988.712
3	1	0	14	182	732	558	[704,531,784,606]					950.683	255.993	276.93	532.923	476.586	484.414	961
3	1	0	14	183	835	598	[739,549,923,660]					986.45	239.019	281.72	520.739	449.988	468.23	918.218
3	1	0	14	184	505	593	[468,568,536,615]					1101.54	264.07	293.468	557.538	525.647	546.544	1072.19
3	1	0	14	185	602	596	[568,574,642,611]					970.417	264.66	294.326	558.986	531.184	563.45	1094.63
3	1	0	14	186	668	607	[642,593,685,633]					928.005	262.539	280.299	542.838	501.195	508.011	1009.21
3	1	0	14	187	551	603	[522,570,581,623]					904.5	262.985	285.757	548.742	628.21	656.936	1285.15
3	1	0	14	188	619	606	[605,596,645,621]					649.636	263.241	267.909	531.15	507.121	501.352	1008.47
3	1	0	14	189	461	625	[347,583,507,664]					1025.09	255.42	300.276	555.696	519.483	523.199	1042.68
3	1	0	14	190	908	635	[873,592,1020,663]					568.227	218.698	246.773	465.471	408.954	441.345	850.299
3	1	0	14	191	58	626	[17,583,99,673]					602.588	205.809	221.613	427.422	411.969	420.555	832.524
3	1	0	14	192	620	634	[588,609,640,664]					871.994	260.724	279.164	539.888	518.684	527.898	1046.58
3	1	0	14	193	771	611	[740,586,822,656]					713.522	248.759	274.373	523.132	468.368	481.231	949.599
3	1	0	14	194	569	633	[551,611,594,659]					958.07	265.906	288.756	554.662	533.425	511.959	1045.38
3	1	0	14	195	652	642	[631,609,679,663]					780.329	260.179	277.922	538.101	520.577	520.749	1041.33
3	1	0	14	196	683	638	[666,611,711,662]					749.529	270.951	314.535	585.486	513.506	526.439	1039.94
3	1	0	14	197	536	639	[507,609,556,662]					1000	264.838	293.351	558.189	522.981	534.97	1057.95
3	1	0	14	198	731	654	[681,585,876,713]					715.895	248.314	273.084	521.398	475.996	488.768	964.764
3	1	0	14	199	506	634	[493,618,522,661]					1048.25	269.004	291.754	560.758	563.566	580.389	1143.95
3	1	0	14	200	588	653	[565,624,619,681]					1036.83	265.032	282.868	547.9	522.398	516.18	1038.58
3	1	0	14	201	266	635	[156,605,326,679]					614.337	237.413	262.798	500.211	494.61	507.73	1002.34
3	1	0	14	202	348	637	[317,601,379,664]					696.653	246.574	265.551	512.125	495.73	501.061	996.791
3	1	0	14	203	560	665	[539,651,577,682]					970.957	265.96	287.833	553.793	513.201	519.667	1032.87
3	1	0	14	204	531	676	[462,657,560,694]					808.604	262.73	284.321	547.051	544.836	578.868	1123.7
3	1	0	14	205	355	697	[321,658,387,746]					828.466	249.342	281.733	531.075	547.904	584.939	1132.84
3	1	0	14	206	680	706	[616,658,753,756]					646.818	257.432	282.232	539.664	505.514	509.879	1015.39
3	1	0	14	207	591	694	[561,670,624,730]					967.926	267.084	284.139	551.223	515.465	528.197	1043.66
3	1	0	14	208	510	700	[500,680,526,720]					1025.6	274.282	296.798	571.08	544.649	545.676	1090.33
3	1	0	14	209	116	693	[32,636,202,744]					507.433	217.025	243.694	460.719	430.713	453.373	884.086
3	1	0	14	210	389	671	[370,654,489,744]					782.944	255.316	278.915	534.231	545.88	546.424	1092.3
3	1	0	14	211	296	720	[95,616,338,796]					726.038	237.928	283.856	521.784	493.788	523.269	1017.06
3	1	0	14	212	486	697	[413,637,510,723]					1038.16	259.483	296.527	556.01	538.054	559.307	1097.36
3	1	0	14	213	902	714	[863,661,1017,749]					534.622	219.745	240.059	459.804	401.927	435.681	837.608
3	1	0	14	214	217	733	[53,682,262,784]					757.306	226.733	269.964	496.697	462.319	516.541	978.86
3	1	0	14	215	548	710	[509,683,568,729]					862.759	263.607	282.681	546.288	523.899	544.069	1067.97
3	1	0	14	216	501	735	[477,721,517,765]					913.112	260.917	273.684	534.601	521.898	524.166	1046.06
3	1	0	14	217	801	741	[741,641,994,794]					613.371	237.175	271.058	508.233	445.036	480.058	925.094
3	1	0	14	218	423	726	[379,686,471,797]					975.182	257	291.281	548.281	613.285	543.108	1156.39
3	1	0	14	219	529	749	[501,726,556,785]					867.167	263.115	284.912	548.027	507.908	515.963	1023.87
3	1	0	14	220	615	743	[553,701,698,799]					927.778	260.949	288.53	549.479	503.38	516.615	1020
3	1	0	14	221	477	749	[468,737,494,767]					912.935	267.869	290.028	557.897	539.257	555.157	1094.41
3	1	0	14	222	716	764	[696,738,753,791]					816.44	252.823	269.267	522.09	482.777	496.049	978.826
3	1	0	14	223	926	764	[843,722,1004,803]					650.006	220.644	248.656	469.3	401.116	437.178	838.294
3	1	0	14	224	562	769	[538,742,601,797]					1035.75	268.483	297.713	566.196	564.208	535	1099.21
3	1	0	14	225	373	755	[308,733,401,789]					771.435	250	271.033	521.033	548.22	571.707	1119.93
3	1	0	14	226	484	774	[468,762,510,789]					909.415	263.443	296.423	559.866	530.975	555.764	1086.74
3	1	0	14	227	466	785	[445,771,496,806]					677.96	257.319	288.28	545.599	527.807	538.62	1066.43
3	1	0	14	228	602	786	[571,766,652,809]					777.055	263.099	282.21	545.309	508.18	512.517	1020.7
3	1	0	14	229	410	782	[367,760,429,811]					797.665	255.477	278.832	534.309	563.857	607.634	1171.49
3	1	0	14	230	346	794	[305,767,386,829]					631.821	250.683	281	531.683	542.013	582.437	1124.45
3	1	0	14	231	519	799	[488,774,559,835]					853.347	260.693	274.871	535.564	499.143	491.02	990.163
3	1	0	14	232	457	812	[440,797,494,832]					745.189	258.242	283.234	541.476	516.174	540.252	1056.43
3	1	0	14	233	168	797	[60,766,207,832]					723.791	222.015	249.473	471.488	453.58	475.173	928.753
3	1	0	14	234	570	809	[542,791,613,831]					708.099	267.138	281.33	548.468	503.709	498.549	1002.26
3	1	0	14	235	895	800	[736,775,995,826]					625.847	231.069	257.55	488.619	426.754	481	907.754
3	1	0	14	236	898	865	[681,781,959,917]					949.335	234.976	279.728	514.704	433.063	484.462	917.525
3	1	0	14	237	286	817	[235,775,316,857]					732.025	243.625	263.924	507.549	501.953	479.076	981.029
3	1	0	14	238	836	825	[793,795,941,856]					856.174	232.283	262.989	495.272	424.69	465.957	890.647
3	1	0	14	239	116	845	[39,779,257,894]					764.504	224.669	262.821	487.49	448.807	491.726	940.533
3	1	0	14	240	382	831	[355,811,412,853]					619.267	254.08	268.54	522.62	583.924	593.687	1177.61
3	1	0	14	241	620	826	[593,805,649,874]					773.628	261.847	280.398	542.245	482.367	488.938	971.305
3	1	0	14	242	672	828	[630,786,746,885]					957.689	255.011	286.484	541.495	477.768	491.025	968.793
3	1	0	14	243	491	847	[445,811,531,925]					936.851	257.18	292.465	549.645	509.167	526.455	1035.62
3	1	0	14	244	543	853	[518,820,593,878]					799.28	263.736	277.645	541.381	501.059	497.204	998.263
3	1	0	14	245	422	822	[396,790,466,895]					979.459	257.736	291.753	549.489	553.998	507.726	1061.72
3	1	0	14	246	577	871	[545,830,611,906]					717.809	262.183	285.125	547.308	497.424	506.669	1004.09
3	1	0	14	247	331	837	[303,814,364,873]					746.508	247.733	265.934	513.667	535.871	565.025	1100.9
3	1	0	14	248	377	859	[359,846,396,894]					813.665	259.184	280.381	539.565	562.108	535.247	1097.36
3	1	0	14	249	297	862	[267,838,321,890]					1049.41	248.088	274.713	522.801	531.576	569.691	1101.27
3	1	0	14	250	333	877	[308,850,373,895]					852.361	250.636	274.068	524.704	590.218	538.762	1128.98
3	1	0	14	251	414	909	[378,853,464,976]					728.333	252.832	278.281	531.113	551.67	642.675	1194.34
3	1	0	14	252	65	884	[22,857,98,910]					294.009	207.672	210.321	417.993	379.543	385.954	765.497
3	1	0	14	253	272	883	[214,848,302,909]					806.176	241.837	269.106	510.943	490.609	492.38	982.989
3	1	0	14	254	779	888	[727,850,926,961]					561.023	232.136	260.695	492.831	420.509	466.241	886.75
3	1	0	14	255	85	907	[32,874,127,963]					600.407	209.352	230.066	439.418	383.073	406.813	789.886
3	1	0	14	256	652	915	[616,878,700,975]					375.1	252.264	261.364	513.628	471.835	480.518	952.353
3	1	0	14	257	366	894	[337,880,387,914]					649.1	249.978	262.933	512.911	622.53	631.656	1254.19
3	1	0	14	258	520	937	[474,871,576,1000]					675.134	249.963	267.606	517.569	497.178	513.047	1010.23
3	1	0	14	259	704	891	[674,862,743,937]					865.07	250.016	280.592	530.608	451.605	466.697	918.302
3	1	0	14	260	500	902	[460,876,525,946]					611.034	250.295	258.787	509.082	512	532.697	1044.7
3	1	0	14	261	233	901	[163,875,261,929]					714.671	235.153	263.072	498.225	453.042	470.213	923.255
3	1	0	14	262	312	901	[286,876,339,922]					874.204	252.405	278.9	531.305	587.744	598.818	1186.56
3	1	0	14	263	358	913	[338,891,399,951]					687.297	248.923	267.62	516.543	574.167	651.994	1226.16
3	1	0	14	264	144	905	[70,883,196,959]					724.423	217.709	258.423	476.132	489.271	442.608	931.879
3	1	0	14	265	211	931	[124,887,239,979]					797.193	224.557	257.952	482.509	413.846	451.531	865.377
3	1	0	14	266	275	925	[250,897,306,950]					760.76	242.029	266.26	508.289	468.499	460.039	928.538
3	1	0	14	267	351	933	[338,921,365,953]					893.907	256.532	279.503	536.035	512.322	534.258	1046.58
3	1	0	14	268	759	969	[694,909,909,1078]					658.808	229.625	260.876	490.501	408.309	437.508	845.817
3	1	0	14	269	308	938	[294,921,328,964]					631.034	240.067	259.685	499.752	458.56	480.831	939.391
3	1	0	14	270	327	928	[313,913,353,961]					763.059	249.574	269.706	519.28	494.352	498.95	993.302
3	1	0	14	271	252	967	[171,925,300,1062]					550.561	224.227	262.215	486.442	410.24	463.963	874.203
3	1	0	14	272	678	984	[629,930,779,1078]					488.86	233.817	256.243	490.06	419.495	511.411	930.906
3	1	0	14	273	285	1006	[229,958,330,1078]					691.8	225.089	254.535	479.624	423.011	496.555	919.566
3	1	0	14	274	449	968	[390,932,493,1019]					859.993	244.441	277.871	522.312	487.091	490.19	977.281
3	1	0	14	275	127	975	[88,947,164,1020]					595.391	209.581	229.991	439.572	370.222	366.918	737.14
3	1	0	14	276	1071	975	[1067,971,1077,983]					458.531	183.417	183.417	366.834	304.021	304.021	608.042
3	1	0	14	277	571	972	[499,937,688,1078]					676.204	241.212	258.19	499.402	441.212	460.869	902.081
3	1	0	14	278	187	985	[140,960,211,1057]					720.928	214.409	244.258	458.667	384.746	412.567	797.313
3	1	0	14	279	369	977	[302,947,404,1067]					469.346	236.606	248.636	485.242	468.522	523.841	992.363
3	1	0	14	280	926	994	[903,941,982,1029]					662.018	205.631	221.081	426.712	354.284	358.063	712.347
3	1	0	14	281	958	994	[940,972,978,1030]					668.747	204.698	219.174	423.872	333.799	342.168	675.967
3	1	0	14	282	1041	998	[1033,992,1057,1009]					421.459	191.908	191.522	383.43	305.996	306.029	612.025
3	1	0	14	283	151	1006	[117,982,170,1049]					668.136	209.25	239.388	448.638	380.008	414.447	794.455
3	1	0	14	284	996	1011	[979,999,1013,1024]					513.623	202.473	203.39	405.863	332.579	321.691	654.27
3	1	0	14	285	598	1047	[553,994,638,1078]					768.611	232.867	255.366	488.233	417.333	449.829	867.162
3	1	0	14	286	104	1014	[71,996,119,1062]					540.806	203.166	219.544	422.71	348.256	362.718	710.974
3	1	0	14	287	817	1042	[781,996,866,1078]					604.209	219.287	242.601	461.888	372.522	404.38	776.902
3	1	0	14	288	466	1040	[418,995,512,1078]					558.532	232.352	242.074	474.426	419.437	426.149	845.586
3	1	0	14	289	536	1026	[499,993,578,1078]					572.615	234.63	256.222	490.852	430.267	442.778	873.045
3	1	0	14	290	356	1020	[335,1006,382,1053]					670.118	232.335	250.693	483.028	483.2	626.63	1109.83
3	1	0	14	291	391	1046	[314,996,430,1078]					544.718	229.926	255.045	484.971	443.895	502.682	946.577
3	1	0	14	292	968	1027	[933,1012,988,1055]					504.563	200.376	208.669	409.045	317.508	320.162	637.67
3	1	0	14	293	865	1035	[844,1005,886,1061]					462.72	211.197	223.94	435.137	357.317	363.86	721.177
3	1	0	14	294	1009	1038	[1002,1029,1019,1046]					422.234	193.972	193.577	387.549	302.09	300.721	602.811
3	1	0	14	295	279	1046	[241,1034,294,1078]					435.33	217.42	234.451	451.871	383.297	396.758	780.055
3	1	0	14	296	35	44	[31,40,41,53]					507.721	197.587	197.587	395.174	296.837	296.837	593.674
3	1	0	14	297	67	464	[50,444,87,497]					365.475	224.733	238.446	463.179	482.625	423.317	905.942
3	1	0	14	298	598	919	[549,837,668,957]					657.322	255.405	267.426	522.831	472.065	487.339	959.404
3	1	0	15	1	1002	34	[997,30,1006,45]					245.854	189.447	189.447	378.894	298.301	298.301	596.602
3	1	0	15	2	947	39	[936,33,963,52]					343.623	196.651	198.443	395.094	315.733	318.302	634.035
3	1	0	15	3	342	44	[303,1,391,86]					218.642	218.252	224.211	442.463	373.458	390.737	764.195
3	1	0	15	4	248	56	[160,1,320,111]					385.814	207.319	218.835	426.154	351.437	374.021	725.458
3	1	0	15	5	44	88	[40,82,52,93]					365.596	188.894	188.894	377.788	303	303	606
3	1	0	15	6	379	112	[191,1,416,171]					461.271	225.168	241.305	466.473	396.439	431.051	827.49
3	1	0	15	7	137	147	[81,89,179,198]					257.719	200.587	205.73	406.317	348.776	362.112	710.888
3	1	0	15	8	888	102	[810,48,950,187]					634.316	212.841	235.388	448.229	369.181	393.918	763.099
3	1	0	15	9	228	156	[173,117,271,215]					303.171	214.198	219.682	433.88	390.555	402.093	792.648
3	1	0	15	10	306	150	[249,104,354,206]					700.821	224.226	252.573	476.799	406.451	432.889	839.34
3	1	0	15	11	186	216	[117,179,284,256]					311.516	214.97	231.6	446.57	398.99	416.589	815.579
3	1	0	15	12	164	358	[66,293,269,430]					260.863	219.866	232.787	452.653	409.52	428.904	838.424
3	1	0	15	13	688	281	[400,94,963,449]					236.563	246.418	256.054	502.472	443.609	456.221	899.83
3	1	0	15	14	1004	406	[958,378,1033,452]					392.971	207.243	215.078	422.321	362.579	378.706	741.285
3	1	0	15	15	880	459	[832,403,1022,497]					561.968	223.366	244.527	467.893	398.703	430.484	829.187
3	1	0	15	16	327	545	[301,497,352,571]					231.292	244.447	251.48	495.927	455.238	461.905	917.143
3	1	0	15	17	84	530	[10,519,106,571]					231.98	206.813	208.373	415.186	379.276	384.951	764.227
3	1	0	15	18	769	481	[491,395,941,592]					245.176	249.488	260.154	509.642	455.672	492.114	947.786
3	1	0	15	19	1031	624	[1011,600,1067,642]					203.288	197.445	196.936	394.381	343.85	348.704	692.554
3	1	0	15	20	363	743	[222,636,551,842]					233.897	247.547	257.384	504.931	456.497	469.55	926.047
3	1	0	15	21	962	729	[933,662,1041,767]					210.032	209.3	216.368	425.668	360.978	368.537	729.515
3	1	0	15	22	70	743	[11,678,161,790]					381.308	210.442	227.548	437.99	386.828	410.606	797.434
3	1	0	15	23	61	854	[10,783,100,936]					289.938	205.646	215.906	421.552	364.494	374.458	738.952
3	1	0	15	24	740	987	[704,953,790,1078]					409.099	227.337	246.835	474.172	381.196	406.752	787.948
3	1	0	15	25	28	964	[19,957,43,1006]					568.747	202.474	209.816	412.29	324.998	325.791	650.789
3	1	0	15	26	10	1004	[4,998,15,1012]					487.857	188.235	188.235	376.47	316.328	316.328	632.656
3	1	0	15	27	569	1016	[413,939,746,1078]					349.116	238.071	252.326	490.397	406.753	420.884	827.637
3	1	0	15	28	15	1021	[11,1017,21,1027]					555	181.806	181.806	363.612	302.011	302.011	604.022
3	1	0	15	29	436	1029	[346,973,525,1078]					361.99	236.782	241.93	478.712	399.083	402.59	801.673
3	1	0	15	30	202	1046	[150,1010,238,1078]					557.019	209.366	235.206	444.572	340.973	363.019	703.992
3	1	0	15	31	85	1054	[77,1049,92,1058]					373.83	196.01	196.01	392.02	313.25	313.25	626.5
3	1	0	15	32	315	1046	[222,1005,389,1078]					357.415	222.548	230.745	453.293	371.914	387.511	759.425
3	1	0	15	33	353	1055	[327,1038,362,1078]					509.714	223.904	232.125	456.029	374.214	375.357	749.571
3	1	0	15	34	379	205	[263,122,460,259]					270.646	237.91	240.646	478.556	431.981	438.828	870.809
3	1	0	15	35	1009	571	[974,538,1040,604]					236.149	204.577	211.19	415.767	357.263	365.738	723.001
3	1	0	15	36	72	667	[6,607,119,712]					218.949	207.4	209.256	416.656	385.381	381.291	766.672
3	1	0	15	37	206	516	[45,407,343,604]					258.671	227.014	257.271	484.285	427.784	789.065	1216.85
3	1	0	15	38	361	404	[222,291,501,653]					240.584	248.258	255.813	504.071	455.8	465.469	921.269
3	1	0	15	39	246	639	[100,519,421,699]					234.252	235.605	250.355	485.96	436.154	457.573	893.727
3	1	0	15	40	462	552	[423,534,496,588]					244.27	254.062	255.566	509.628	464.114	467.148	931.262
3	1	0	15	41	522	543	[481,482,783,615]					234.545	257.571	258.521	516.092	475.642	469.9	945.542
3	1	0	15	42	727	661	[697,633,794,690]					235.059	250.81	254.668	505.478	671.678	949.71	1621.39
3	1	0	15	43	583	647	[421,559,882,698]					250.494	253.423	260.293	513.716	489.072	595.913	1084.99
3	1	0	15	44	492	833	[363,681,622,945]					265.593	253.407	259.777	513.184	460.646	502.675	963.321
3	1	0	15	45	810	716	[655,627,973,811]					235.492	240.587	262.493	503.08	469.573	566.45	1036.02
3	1	0	15	46	650	805	[552,662,751,957]					238.293	256.409	262.73	519.139	466.76	571.098	1037.86
3	1	0	15	47	824	905	[584,762,978,1078]					247.743	232.679	250.063	482.742	395.914	437.048	832.962
3	1	0	15	48	525	112	[395,1,682,231]					255.418	233.461	245.185	478.646	411.103	435.314	846.417
3	1	0	16	1	297	18	[269,1,340,37]					552.467	208.113	221.637	429.75	349.684	358.504	708.188
3	1	0	16	2	403	22	[334,1,462,49]					632.698	216.795	236.973	453.768	367.735	379.368	747.103
3	1	0	16	3	700	22	[664,1,732,52]					473.563	218.305	224.607	442.912	361.409	369.473	730.882
3	1	0	16	4	543	72	[425,1,709,145]					683.966	228.697	256.708	485.405	397.317	429.112	826.429
3	1	0	16	5	324	109	[137,17,439,225]					648.84	222.267	254.213	476.48	394.468	441.507	835.975
3	1	0	16	6	84	187	[62,175,93,209]					472.222	195.987	197.855	393.842	356.146	358.41	714.556
3	1	0	16	7	725	213	[368,19,920,384]					1042.13	239.353	281.007	520.36	429.634	463.055	892.689
3	1	0	16	8	288	232	[132,181,344,297]					787.77	225.222	259.23	484.452	419.667	459.91	879.577
3	1	0	16	9	215	249	[121,229,255,282]					513.091	218.223	241.614	459.837	412.799	443.705	856.504
3	1	0	16	10	183	332	[147,296,231,363]					568.417	222.613	235.496	458.109	438.077	455.118	893.195
3	1	0	16	11	276	349	[91,256,351,429]					615.222	228.481	260.293	488.774	446.547	475.606	922.153
3	1	0	16	12	276	564	[121,521,405,609]					942.522	233.904	255.856	489.76	459.153	478.133	937.286
3	1	0	16	13	431	439	[122,289,688,767]					733.033	249.288	268.603	517.891	465.012	486.322	951.334
3	1	0	16	14	765	671	[533,484,979,863]					725.634	244.362	270.183	514.545	442.171	464.774	906.945
3	1	0	16	15	980	805	[957,762,1024,857]					490.907	204.456	215.275	419.731	358.962	368.044	727.006
3	1	0	16	16	871	858	[783,802,972,941]					611.395	221.49	253.725	475.215	390.317	456.82	847.137
3	1	0	16	17	974	882	[936,864,1001,897]					465.612	204.051	213.94	417.991	356.731	367.026	723.757
3	1	0	16	18	459	901	[269,716,820,1078]					585.443	246.929	261.2	508.129	438.517	466.47	904.987
3	1	0	16	19	1016	902	[1000,883,1036,922]					441.698	195.82	194.825	390.645	325.048	328.486	653.534
3	1	0	16	20	120	933	[46,891,168,983]					525.946	209.786	236.183	445.969	358.784	387.806	746.59
3	1	0	16	21	808	926	[757,895,847,960]					533.102	233.079	248.796	481.875	402.592	415.99	818.582
3	1	0	16	22	893	993	[820,944,946,1058]					520.464	213.691	240.728	454.419	355.152	398.979	754.131
3	1	0	16	23	591	1028	[519,979,652,1078]					512.709	234.611	249.777	484.388	399.302	443.369	842.671
3	1	0	16	24	958	1023	[946,1010,969,1045]					483.601	200.523	203.929	404.452	319.895	321.024	640.919
3	1	0	16	25	716	1049	[668,1019,789,1078]					467.077	224.59	241.085	465.675	369.167	369.521	738.688
3	1	0	16	26	96	447	[33,405,163,491]					9575.87	296.702	396.315	693.017	35517.6	65003	100521
3	1	0	17	1	493	22	[461,1,519,67]					715.439	225.112	243.177	468.289	435.22	460.817	896.037
3	1	0	17	2	557	50	[466,1,625,103]					866.821	229.778	257.253	487.031	430.719	436.105	866.824
3	1	0	17	3	80	80	[74,72,90,98]					461.956	198.03	200.292	398.322	341.978	352.124	694.102
3	1	0	17	4	357	57	[302,1,427,130]					663.011	223.367	250.779	474.146	413.828	449.958	863.786
3	1	0	17	5	427	39	[381,1,475,127]					586.894	225.879	250.404	476.283	414.411	446.117	860.528
3	1	0	17	6	924	93	[890,64,965,131]					568.854	204.901	222.685	427.586	365.485	396.223	761.708
3	1	0	17	7	866	78	[820,13,928,134]					491.31	211.443	227.349	438.792	374.56	396.024	770.584
3	1	0	17	8	96	131	[73,104,121,155]					506.953	198.322	200.67	398.992	374.164	370.642	744.806
3	1	0	17	9	492	123	[426,78,587,169]					529.011	239.258	250.359	489.617	457.858	497.402	955.26
3	1	0	17	10	1009	124	[997,101,1024,141]					636.407	205.204	216.876	422.08	356.366	331.65	688.016
3	1	0	17	11	151	117	[119,94,170,149]					516.731	203.364	217.151	420.515	412.092	446.054	858.146
3	1	0	17	12	974	126	[946,92,998,167]					691.547	202.617	227.591	430.208	350.4	380.459	730.859
3	1	0	17	13	309	133	[259,91,344,187]					780.904	226.806	255.144	481.95	438.566	475.979	914.545
3	1	0	17	14	223	111	[166,43,315,204]					792.947	216.868	248.384	465.252	418.122	546.106	964.228
3	1	0	17	15	938	151	[919,128,960,188]					490.168	206.049	211.032	417.081	371.612	379.284	750.896
3	1	0	17	16	389	159	[235,5,446,199]					647.217	224.432	254.953	479.385	422.227	460.208	882.435
3	1	0	17	17	173	178	[163,162,182,202]					806.52	503.697	435.549	939.246	24130.5	16215.5	40346
3	1	0	17	18	966	182	[956,156,1017,194]					523.778	201.695	215.833	417.528	351.269	367.2	718.469
3	1	0	17	19	235	196	[204,165,265,216]					617.781	222.612	236.4	459.012	491.605	518.181	1009.79
3	1	0	17	20	161	206	[152,188,175,217]					707	691.071	361.868	1052.94	31152.8	28689.7	59842.5
3	1	0	17	21	325	202	[303,168,342,231]					473.288	231.405	241.97	473.375	468.224	507.25	975.474
3	1	0	17	22	204	211	[185,130,219,224]					616.731	217.616	240.398	458.014	577.502	733.185	1310.69
3	1	0	17	23	432	215	[372,144,467,244]					494.901	239.962	253.82	493.782	464.701	465.505	930.206
3	1	0	17	24	105	229	[57,186,121,261]					513.455	202.423	212.917	415.34	562.462	649.992	1212.45
3	1	0	17	25	224	232	[198,208,258,252]					655.565	225.389	242.102	467.491	584.037	574.139	1158.18
3	1	0	17	26	30	238	[24,228,38,245]					647.566	204.233	207.151	411.384	406.419	409.821	816.24
3	1	0	17	27	357	212	[336,189,408,277]					550.848	237.875	247.978	485.853	470.832	470.609	941.441
3	1	0	17	28	160	246	[147,217,172,284]					15342.2	1012.84	1308.73	2321.57	59266.6	65535	124802
3	1	0	17	29	285	230	[207,196,349,285]					552.449	232.103	253.753	485.856	503.204	476.191	979.395
3	1	0	17	30	200	272	[191,259,218,285]					647.912	230.422	240.168	470.59	1048.82	973.416	2022.24
3	1	0	17	31	226	287	[192,269,245,306]					672.814	229.45	239.423	468.873	634.798	645.071	1279.87
3	1	0	17	32	8	297	[2,292,19,304]					668.648	200.713	200.824	401.537	392.174	391.736	783.91
3	1	0	17	33	64	293	[29,273,92,348]					598.602	200.955	207.773	408.728	501.479	497.185	998.664
3	1	0	17	34	869	306	[797,283,915,327]					7424.79	701.563	908.653	1610.22	52246.7	64193.5	116440
3	1	0	17	35	168	339	[137,283,191,414]					14341.8	1121.63	2205.38	3327.01	56207.6	64923.4	121131
3	1	0	17	36	228	320	[192,296,246,342]					708.178	235.046	264.604	499.65	656.224	936.594	1592.82
3	1	0	17	37	14	344	[1,332,25,358]					576.936	198.056	200.819	398.875	445.002	417.755	862.757
3	1	0	17	38	386	307	[180,236,440,501]					686.586	244.568	268.554	513.122	478.736	495.783	974.519
3	1	0	17	39	286	365	[173,311,360,461]					717.674	237.64	254.13	491.77	524.754	476.75	1001.5
3	1	0	17	40	126	381	[116,375,134,393]					568.398	220.495	225.767	446.262	1242.31	1224.52	2466.83
3	1	0	17	41	904	400	[815,318,1014,469]					478.958	222.306	239.126	461.432	476.897	465.747	942.644
3	1	0	17	42	995	421	[964,398,1016,448]					529.943	212.494	228.273	440.767	3492.36	8906.15	12398.5
3	1	0	17	43	50	425	[1,403,63,447]					580.92	312.999	354.875	667.874	55291.9	62289.1	117581
3	1	0	17	44	589	383	[333,128,873,575]					597.847	254.011	276.092	530.103	476.05	495.816	971.866
3	1	0	17	45	125	487	[44,437,183,545]					809.78	213.594	250.96	464.554	564.679	4106.34	4671.02
3	1	0	17	46	32	567	[1,522,55,599]					477.115	201.78	208.894	410.674	394.224	395.971	790.195
3	1	0	17	47	154	579	[46,546,189,607]					629.863	212.968	225.158	438.126	423.62	449.921	873.541
3	1	0	17	48	260	539	[79,474,306,623]					604.673	231.463	249.708	481.171	474.129	478.575	952.704
3	1	0	17	49	211	581	[152,531,258,623]					707.827	225.059	248.233	473.292	447.772	485.541	933.313
3	1	0	17	50	669	606	[565,541,930,679]					641.771	245.612	264.286	509.898	486.651	476.21	962.861
3	1	0	17	51	952	633	[916,559,997,688]					4164.26	230.762	299.697	530.459	7373.61	23891.6	31265.2
3	1	0	17	52	996	614	[986,604,1012,626]					1014.67	205.647	204.984	410.631	518.066	530.614	1048.68
3	1	0	17	53	340	599	[284,515,392,678]					722.118	245.419	263.03	508.449	488.544	481.284	969.828
3	1	0	17	54	1022	632	[996,609,1050,668]					528	201.328	207.927	409.255	531.526	525.402	1056.93
3	1	0	17	55	202	677	[57,584,309,758]					537.763	226.025	243.012	469.037	488.492	654.03	1142.52
3	1	0	17	56	399	663	[291,592,427,723]					660.8	248.246	267.1	515.346	487.731	488.662	976.393
3	1	0	17	57	530	648	[382,550,815,868]					713.838	255.411	275.524	530.935	482.971	509.743	992.714
3	1	0	17	58	961	707	[871,670,1019,778]					676.172	215.797	242.075	457.872	401.249	438.545	839.794
3	1	0	17	59	896	726	[880,712,954,744]					518.193	220.531	237	457.531	406.397	423.852	830.249
3	1	0	17	60	134	735	[96,715,177,749]					499.978	218.127	225.978	444.105	412.438	426.511	838.949
3	1	0	17	61	826	760	[722,644,966,902]					503.026	234.414	260.105	494.519	429.828	457.842	887.67
3	1	0	17	62	502	802	[392,665,625,961]					580.848	254.697	267.866	522.563	480.1	472	952.1
3	1	0	17	63	238	783	[209,753,270,827]					561.337	235.417	250.821	486.238	447.884	454.684	902.568
3	1	0	17	64	331	776	[245,690,435,870]					640.322	247.524	266.2	513.724	455.526	468.304	923.83
3	1	0	17	65	154	791	[53,711,222,858]					583.687	218.464	235.336	453.8	409.95	455.149	865.099
3	1	0	17	66	213	808	[188,797,230,823]					515.574	232.968	241.489	474.457	437.473	444.415	881.888
3	1	0	17	67	64	819	[19,777,103,869]					510.711	207.449	222.904	430.353	373.456	395.911	769.367
3	1	0	17	68	186	844	[136,813,241,871]					645.452	228.59	235.686	464.276	428.602	450.682	879.284
3	1	0	17	69	260	842	[195,820,294,913]					533.556	234.483	243.079	477.562	427.986	448.96	876.946
3	1	0	17	70	325	948	[150,835,411,1078]					575.129	235.899	258.644	494.543	426.022	458.364	884.386
3	1	0	17	71	844	920	[759,846,956,1035]					448.331	224.574	242.118	466.692	392.675	421.024	813.699
3	1	0	17	72	140	892	[46,843,201,970]					425.872	214.201	234.128	448.329	381.644	409.766	791.41
3	1	0	17	73	591	926	[387,816,796,1078]					558.99	244.931	265.699	510.63	429.711	464.214	893.925
3	1	0	17	74	193	988	[115,925,252,1076]					506.745	217.165	242.147	459.312	392.684	409.971	802.655
3	1	0	17	75	108	989	[61,956,140,1028]					454.81	202.445	212.45	414.895	345.701	359.88	705.581
3	1	0	17	76	636	1040	[580,997,696,1078]					501.182	231.376	244.099	475.475	388.829	418.785	807.614
3	1	0	17	77	215	1047	[177,1019,297,1078]					532.623	214.484	238.47	452.954	717.839	554.205	1272.04
3	1	0	17	78	29	1057	[20,1042,38,1069]					539.093	193.049	192.55	385.599	312.536	313.531	626.067
3	1	0	17	79	337	1067	[313,1055,350,1078]					496.121	221.149	227.879	449.028	367.825	365.89	733.715
3	1	0	17	80	86	396	[59,362,111,431]					8267.41	497.017	496.85	993.867	52508.7	50660.4	103169
3	1	0	17	81	1031	431	[1003,407,1078,468]					3854.15	229.923	254.379	484.302	36298.7	46166	82464.7
3	1	0	18	1	846	26	[812,1,877,51]					579.057	208.272	216.75	425.022	368.31	374.15	742.46
3	1	0	18	2	928	32	[914,18,939,47]					403.77	199.876	205.035	404.911	342.173	345.575	687.748
3	1	0	18	3	966	33	[955,26,975,44]					575.678	204.445	214.111	418.556	337.374	341.444	678.818
3	1	0	18	4	945	37	[936,8,960,50]					338.162	198.044	201.816	399.86	330.657	343.059	673.716
3	1	0	18	5	1003	50	[991,36,1013,61]					435.398	195.352	199.463	394.815	324.397	329.787	654.184
3	1	0	18	6	1040	71	[1028,68,1045,77]					338.155	186.35	186.35	372.7	338.874	338.874	677.748
3	1	0	18	7	750	23	[722,1,783,98]					443.01	219.397	233.353	452.75	410.481	429.186	839.667
3	1	0	18	8	716	83	[693,24,765,109]					396.83	227.091	247.096	474.187	423.874	455.394	879.268
3	1	0	18	9	825	87	[766,1,915,129]					472.807	213.495	225.354	438.849	382.586	414.861	797.447
3	1	0	18	10	999	110	[965,83,1016,130]					458.019	197.023	198.774	395.797	338.612	353.311	691.923
3	1	0	18	11	956	121	[934,103,1006,157]					409.57	201.564	215.86	417.424	350.682	359.72	710.402
3	1	0	18	12	904	112	[886,89,936,133]					486.56	208.079	223.5	431.579	379.107	394.53	773.637
3	1	0	18	13	649	77	[589,1,725,142]					463.198	229.605	249.297	478.902	426.215	442.099	868.314
3	1	0	18	14	909	149	[845,46,951,176]					577.271	209.79	230.62	440.41	384.602	406.428	791.03
3	1	0	18	15	1058	133	[1052,127,1070,142]					350.97	189.31	188.945	378.255	313.203	313.22	626.423
3	1	0	18	16	159	142	[90,97,199,182]					361.154	202.993	210.242	413.235	435.184	589.879	1025.06
3	1	0	18	17	558	46	[497,1,801,176]					439.99	232.703	243.657	476.36	466.185	510.48	976.665
3	1	0	18	18	987	165	[963,140,1014,194]					419.628	199.072	206.287	405.359	346.377	360.851	707.228
3	1	0	18	19	867	191	[822,147,953,223]					557.165	217.401	229.714	447.115	416.15	431.769	847.919
3	1	0	18	20	967	193	[934,165,999,223]					625.832	204.387	223.129	427.516	375.511	383.46	758.971
3	1	0	18	21	810	148	[753,113,858,218]					372.756	226.826	238.878	465.704	434.079	435.356	869.435
3	1	0	18	22	937	235	[918,195,1011,263]					497.364	207.45	216.727	424.177	385.675	400.95	786.625
3	1	0	18	23	990	228	[972,203,1024,257]					568.991	202.334	218.352	420.686	359.979	388.481	748.46
3	1	0	18	24	145	219	[78,150,218,275]					423.704	209.442	223.417	432.859	429.605	441.548	871.153
3	1	0	18	25	673	216	[581,123,792,318]					800.028	244.646	270.383	515.029	478.848	505.692	984.54
3	1	0	18	26	490	165	[360,55,610,309]					316.598	244.718	258.897	503.615	499.014	476.165	975.179
3	1	0	18	27	432	342	[285,227,637,460]					1061.5	250.294	281.178	531.472	478.962	503.544	982.506
3	1	0	18	28	1006	283	[950,249,1029,335]					438.377	204.628	220.033	424.661	388.907	472.443	861.35
3	1	0	18	29	916	350	[885,326,947,370]					348.543	220.868	221.957	442.825	402.624	410.12	812.744
3	1	0	18	30	1005	336	[984,302,1049,363]					409.695	203.188	210.232	413.42	373.498	392.989	766.487
3	1	0	18	31	697	364	[553,217,892,461]					646.011	248.245	264.848	513.093	471.277	498.076	969.353
3	1	0	18	32	1019	395	[1010,385,1031,414]					474.225	203.739	208.415	412.154	346.798	347.507	694.305
3	1	0	18	33	833	370	[732,312,902,456]					425.796	236.734	250.34	487.074	438.105	452.252	890.357
3	1	0	18	34	1066	423	[1059,414,1075,431]					417.795	190.424	190.122	380.546	355.706	354.679	710.385
3	1	0	18	35	921	440	[761,328,1035,530]					512.203	222.987	245.212	468.199	435.161	463.059	898.22
3	1	0	18	36	67	470	[17,444,105,503]					653.313	204.808	220.527	425.335	403.162	410.241	813.403
3	1	0	18	37	876	533	[783,503,1020,565]					471.683	227.867	247.969	475.836	422.716	452.565	875.281
3	1	0	18	38	63	561	[21,513,155,608]					646.167	208.28	228.371	436.651	416.405	458.081	874.486
3	1	0	18	39	1066	546	[1063,541,1078,551]					425.537	193	193	386	330.632	330.632	661.264
3	1	0	18	40	180	527	[139,496,211,591]					415.438	222.539	231.115	453.654	464.397	461	925.397
3	1	0	18	41	973	554	[944,536,1040,576]					473.937	208.269	219.406	427.675	397.945	417.599	815.544
3	1	0	18	42	1021	583	[993,558,1041,603]					301.461	202.032	204.157	406.189	365.848	386.983	752.831
3	1	0	18	43	447	567	[217,424,576,867]					354.324	252.596	257.324	509.92	514.24	488.676	1002.92
3	1	0	18	44	721	649	[517,424,953,904]					321.753	253.675	257.652	511.327	477.946	482.36	960.306
3	1	0	18	45	1064	633	[1054,623,1078,642]					450.636	193.013	192.737	385.75	328.623	328.559	657.182
3	1	0	18	46	278	669	[46,574,368,757]					401.406	231.044	251.196	482.24	465.805	474.507	940.312
3	1	0	18	47	180	757	[159,736,202,781]					410.778	224.956	229.367	454.323	486.874	516.333	1003.21
3	1	0	18	48	103	769	[10,711,210,856]					598.265	214.997	237.827	452.824	461.473	538.81	1000.28
3	1	0	18	49	235	772	[46,669,294,846]					359.242	227.454	237.806	465.26	503.61	656.5	1160.11
3	1	0	18	50	314	889	[197,747,433,1078]					458.43	240.478	250.131	490.609	501.789	637.551	1139.34
3	1	0	18	51	173	847	[147,835,187,864]					473.248	222.11	225	447.11	495.741	492.188	987.929
3	1	0	18	52	201	859	[178,835,248,877]					366.289	231.935	233.73	465.665	622.694	683.006	1305.7
3	1	0	18	53	171	871	[146,862,183,886]					441.864	221.9	221.977	443.877	508.924	488.989	997.913
3	1	0	18	54	186	893	[151,872,209,934]					525.344	225.024	225.4	450.424	548.297	518.233	1066.53
3	1	0	18	55	168	907	[154,895,184,918]					455.392	221.954	223.615	445.569	495.616	510.554	1006.17
3	1	0	18	56	127	900	[89,842,169,948]					476.064	216.724	220.792	437.516	702.116	498.266	1200.38
3	1	0	18	57	159	937	[114,918,187,967]					492.697	216.515	219.285	435.8	484.632	483.412	968.044
3	1	0	18	58	241	942	[88,907,273,1026]					531.243	221.555	235.658	457.213	2400.48	15515.3	17915.8
3	1	0	18	59	876	951	[851,930,928,975]					351.109	214.04	221.416	435.456	377.157	377.604	754.761
3	1	0	18	60	240	1021	[129,954,298,1078]					8718.35	228.97	363.967	592.937	9302.33	64265.5	73567.8
3	1	0	18	61	173	1034	[137,1019,192,1049]					329.194	206.669	211.922	418.591	456.812	467.33	924.142
3	1	0	18	62	163	1062	[126,1040,190,1078]					542.526	205.179	215.159	420.338	425.059	469.594	894.653
3	1	0	18	63	312	1062	[290,1044,359,1078]					379.448	220.382	226.534	446.916	447.842	447.699	895.541
3	1	0	18	64	520	1042	[416,1007,630,1078]					464.242	231.272	235.636	466.908	406.45	407.131	813.581
3	1	0	18	65	79	935	[25,812,119,994]					4260.15	223.286	257.966	481.252	17020.9	37731.2	54752.1
3	1	0	19	1	969	218	[769,22,1078,589]					248.203	203.109	184.38	387.489	380.451	337.171	717.622
3	1	0	19	2	793	387	[753,314,1021,412]					220.992	227.051	204.946	431.997	435.33	362.2	797.53
3	1	0	19	3	526	506	[515,485,535,515]					235.693	259.122	259.122	518.244	508.404	508.404	1016.81
3	1	0	19	4	506	512	[498,506,516,518]					236.095	264.101	264.101	528.202	502.036	502.036	1004.07
3	1	0	19	5	474	578	[456,565,485,593]					233.346	256.202	256.202	512.404	491.531	491.531	983.062
3	1	0	19	6	496	584	[477,563,514,598]					233.766	253.105	256.168	509.273	503.534	522.546	1026.08
3	1	0	19	7	353	618	[333,571,406,644]					230.455	248.898	250.465	499.363	492.303	484.994	977.297
3	1	0	19	8	503	790	[493,781,513,805]					230.012	259.816	259.816	519.632	512.594	512.594	1025.19
3	1	0	19	9	510	832	[499,824,522,844]					233.201	252.887	254.626	507.513	493.331	496.435	989.766
3	1	0	19	10	955	749	[764,586,1078,900]					303.447	206.89	189.638	396.528	379.989	332.883	712.872
3	1	0	19	11	540	861	[527,852,553,876]					344.55	265.027	265.027	530.054	492.09	492.09	984.18
3	1	0	19	12	684	864	[660,853,733,900]					231.766	248.485	251.444	499.929	465.683	467.81	933.493
3	1	0	19	13	862	865	[749,826,955,903]					229.194	227.05	212.259	439.309	417.625	388.148	805.773
3	1	0	19	14	516	884	[497,869,525,905]					265.153	254.709	255.432	510.141	479.984	478.238	958.222
3	1	0	19	15	462	889	[444,879,475,902]					267.284	250.576	250.881	501.457	473.548	475.668	949.216
3	1	0	19	16	960	912	[909,877,1025,945]					324.922	202.196	189.652	391.848	361.274	323.774	685.048
3	1	0	19	17	1041	905	[985,877,1078,987]					199.04	185.718	183.16	368.878	318.55	315.36	633.91
3	1	0	19	18	1055	970	[1011,916,1078,993]					205.644	176.153	174.23	350.383	309.321	302.763	612.084
3	1	0	19	19	764	957	[680,907,890,1018]					245.115	230.481	222.938	453.419	413.154	388.146	801.3
3	1	0	19	20	1004	1032	[748,941,1078,1078]					256.096	195.714	169.798	365.512	333.845	296.862	630.707
3	1	0	19	21	172	172	[1,1,446,539]					433.966	210.774	211.315	422.089	414.474	412.36	826.834
3	1	0	19	22	828	925	[755,889,1002,1016]					268.582	215.629	200.846	416.475	385.254	349.176	734.43
3	1	0	19	23	463	246	[410,203,553,344]					228.04	246.125	245.738	491.863	503.217	470.2	973.417
3	1	0	19	24	505	485	[415,455,529,512]					232.016	259.49	259.831	519.321	505.094	505.743	1010.84
3	1	0	19	25	371	530	[322,505,408,548]					237.858	248.318	253.14	501.458	709.055	561.536	1270.59
3	1	0	19	26	453	559	[423,540,473,587]					230.115	257.159	258.43	515.589	492.613	492.03	984.643
3	1	0	19	27	637	610	[621,597,670,625]					232.546	261.669	261.669	523.338	491.644	491.644	983.288
3	1	0	19	28	627	663	[610,626,671,718]					229.88	260.713	261.517	522.23	505.297	504.848	1010.14
3	1	0	19	29	545	708	[524,694,582,722]					232.208	262.999	262.999	525.998	608.241	608.241	1216.48
3	1	0	19	30	467	721	[401,698,493,761]					245.807	251.681	254.125	505.806	490.345	492.817	983.162
3	1	0	19	31	522	728	[500,712,539,753]					250.798	260.427	261.184	521.611	501.58	502.75	1004.33
3	1	0	19	32	559	727	[536,713,581,738]					254.303	262.926	262.926	525.852	507.859	507.859	1015.72
3	1	0	19	33	583	742	[532,716,623,770]					231.376	263.859	263.859	527.718	549.168	549.168	1098.34
3	1	0	19	34	465	769	[442,740,499,798]					254.053	252.491	254.216	506.707	491.797	490.812	982.609
3	1	0	19	35	636	763	[619,749,657,796]					231.133	260.71	260.71	521.42	532.766	532.766	1065.53
3	1	0	19	36	552	769	[520,754,567,793]					237.542	261.686	261.686	523.372	502.363	502.363	1004.73
3	1	0	19	37	351	760	[215,698,442,925]					238.807	245.159	251.692	496.851	478.298	481.819	960.117
3	1	0	19	38	516	803	[501,790,530,822]					237.558	259.941	259.941	519.882	490.73	490.73	981.46
3	1	0	19	39	593	816	[576,802,621,834]					243.567	262.943	262.943	525.886	575.463	575.463	1150.93
3	1	0	19	40	452	824	[413,799,475,848]					231.039	248.484	250.777	499.261	481.764	480.223	961.987
3	1	0	19	41	456	865	[392,843,476,892]					244.146	248.966	250.359	499.325	767.82	510.146	1277.97
3	1	0	19	42	533	937	[478,851,594,975]					300.48	250.123	256.169	506.292	467.441	483.296	950.737
3	1	0	19	43	618	888	[598,853,662,928]					229.552	254.655	258.962	513.617	467.971	472.029	940
3	1	0	19	44	247	966	[187,877,504,1012]					268.357	239.9	251.298	491.198	442.353	470.421	912.774
3	1	0	19	45	290	329	[210,284,337,378]					284.731	237.512	233.888	471.4	464.396	464.947	929.343
3	1	0	19	46	653	980	[622,933,695,1018]					230.611	244.024	243.885	487.909	439.387	421.143	860.53
3	1	0	20	1	337	411	[81,88,558,719]					7834.3	239.301	339.46	578.762	2042.91	56039.2	58082.1
3	1	0	21	1	524	172	[226,1,820,339]					8335.26	241.27	472.358	713.628	1249.48	54375.2	55624.7
3	1	0	21	2	34	516	[4,458,66,551]					850.102	230.261	265.986	496.247	821.703	905.206	1726.91
3	1	0	21	3	13	552	[5,539,28,568]					627.394	256.41	277.394	533.804	989.912	1048.88	2038.79
3	1	0	21	4	170	601	[138,548,201,635]					683.591	263.457	508.619	772.076	920.333	2197.34	3117.67
3	1	0	21	5	88	604	[68,574,135,671]					10251.3	1461.2	1913.85	3375.05	40906	59376.1	100282
3	1	0	21	6	84	626	[78,618,90,638]					1098.67	583.7	614.318	1198.02	8592.25	9174.27	17766.5
3	1	0	21	7	22	661	[1,597,57,694]					6125.83	2470.52	1877.01	4347.53	12883.5	11920.4	24803.9
3	1	0	21	8	184	660	[162,631,201,681]					950.531	253.68	280.789	534.469	821.078	799.964	1621.04
3	1	0	21	9	222	669	[154,614,256,711]					1120.58	251.822	289.714	541.536	707.21	799.325	1506.54
3	1	0	21	10	22	727	[1,629,68,774]					2763.37	5273.04	5865.15	11138.2	756.412	527.121	1283.53
3	1	0	21	11	153	702	[138,683,198,722]					793.265	259.723	300.742	560.465	924.022	1209.28	2133.3
3	1	0	21	12	48	707	[26,692,65,728]					4986.88	2393.71	2244.4	4638.11	8419.93	11965.9	20385.8
3	1	0	21	13	190	722	[170,700,209,737]					685.368	260.39	278.105	538.495	935.504	1003.72	1939.22
3	1	0	21	14	558	655	[318,428,862,1001]					9662.56	267.216	350.454	617.67	1482.33	47063.1	48545.4
3	1	0	21	15	119	750	[55,708,145,780]					14049.7	3806.06	6490.17	10296.2	17513.4	41748	59261.4
3	1	0	21	16	208	761	[187,745,231,779]					902.779	616.806	1241.34	1858.15	13215.5	40162.6	53378.1
3	1	0	21	17	188	778	[177,769,198,791]					759.243	397.46	435.665	833.125	2332.95	2600.69	4933.64
3	1	0	21	18	170	789	[164,780,177,798]					609.267	1868.82	2005.58	3874.4	17250.9	17139.7	34390.6
3	1	0	21	19	273	759	[252,717,298,816]					1018.22	276.311	434.855	711.166	901.142	1641.48	2542.62
3	1	0	21	20	193	808	[185,789,208,824]					684.988	1319.03	1476.78	2795.81	29603.5	31553.8	61157.3
3	1	0	21	21	158	812	[126,771,195,848]					8240.47	2607.76	2576.99	5184.75	17051.8	16332.3	33384.1
3	1	0	21	22	321	841	[304,827,338,876]					19137.1	1708.14	1144.83	2852.97	46240.1	60187.5	106428
3	1	0	21	23	213	865	[188,842,242,886]					10206.3	2163.92	3342.51	5506.43	30174.9	62088.7	92263.6
3	1	0	21	24	263	885	[248,858,289,904]					795.919	1945.63	2116.79	4062.42	19517.5	23519.1	43036.6
3	1	0	21	25	295	897	[273,875,340,913]					721.308	1603.94	1642.31	3246.25	15859.3	10090.6	25949.9
3	1	0	21	26	371	920	[347,905,398,938]					723.202	273.759	298.847	572.606	940.505	1027.81	1968.32
3	1	0	21	27	282	932	[260,919,333,945]					610.394	1302.4	1063.73	2366.13	16064	10979.3	27043.3
3	1	0	21	28	292	949	[270,941,315,957]					696.531	1596.65	1941.39	3538.04	21934.6	26011.9	47946.5
3	1	0	21	29	399	943	[372,920,422,962]					674.961	274.481	302.654	577.135	866.365	1014.71	1881.08
3	1	0	21	30	448	1035	[431,985,477,1058]					643.617	293.799	443.066	736.865	877.851	1182.02	2059.87
3	1	0	21	31	397	1047	[354,1018,446,1078]					628.341	309.481	367.405	676.886	7584.64	3897.43	11482.1
3	1	0	21	32	501	1068	[479,1059,516,1078]					628.097	1448.82	1728.92	3177.74	19716.2	21631.8	41348
3	1	0	21	33	50	627	[16,596,81,668]					6024.27	1833.2	2755.34	4588.54	24049.6	43874.2	67923.8
3	1	0	21	34	97	802	[1,750,195,928]					3801.49	3983.17	3938.3	7921.47	1852.45	1109.95	2962.4
3	1	0	21	35	210	797	[191,779,253,846]					7213.42	2048.44	2201.23	4249.67	27855.1	31918.9	59774
3	1	0	21	36	270	843	[231,807,295,876]					6320.4	2609.05	2773.98	5383.03	22631.9	26400.9	49032.8
3	1	0	21	37	174	869	[150,839,198,894]					4834.37	2218.94	2274.63	4493.57	4128.44	2929.52	7057.96
3	1	0	21	38	303	868	[282,852,319,886]					6075.28	1887.83	2068.38	3956.21	39784.7	44013.3	83798
3	1	0	21	39	234	929	[210,903,263,952]					4568.99	3220	3520.73	6740.73	4322.93	3633.52	7956.45
3	1	0	21	40	202	957	[96,903,305,1001]					4089.09	4486.76	3033.37	7520.13	1627.4	1505.84	3133.24
3	1	0	21	41	352	989	[290,944,440,1022]					4469.33	1973.38	2218.04	4191.42	20042.8	27271.2	47314
3	1	0	22	1	535	257	[266,1,897,517]					9080.45	246.107	367.638	613.745	1675.35	55228.9	56904.2
3	1	0	22	2	701	670	[408,391,965,917]					11502.8	249.693	403.42	653.113	1615.33	54930	56545.3
3	1	0	23	1	989	104	[967,83,1000,134]					902.565	197.721	196.073	393.794	1352.47	3105.75	4458.22
3	1	0	23	2	964	112	[943,101,980,128]					996.71	203.904	208.49	412.394	1972.59	3192.97	5165.56
3	1	0	23	3	899	131	[846,1,984,195]					3972.94	209.024	240.898	449.922	1405.38	19593.9	20999.3
3	1	0	23	4	1027	144	[1013,137,1049,164]					1243.63	204.076	213.568	417.644	4223.74	6509.54	10733.3
3	1	0	23	5	996	155	[979,135,1024,188]					1658.18	204.027	227.717	431.744	3945.36	9105.43	13050.8
3	1	0	23	6	671	116	[530,1,847,232]					595.928	229.208	252.053	481.261	805.865	7534.45	8340.32
3	1	0	23	7	314	217	[135,1,531,425]					537.825	228.912	241.105	470.017	470.741	495.168	965.909
3	1	0	23	8	928	224	[872,168,1000,274]					543.221	211.093	214	425.093	1654.06	8408.62	10062.7
3	1	0	23	9	520	229	[380,78,582,440]					589.689	247.14	261.644	508.784	509.511	524.667	1034.18
3	1	0	23	10	541	405	[443,225,717,539]					7733.95	261.701	361.924	623.625	5964.77	60349.8	66314.6
3	1	0	23	11	768	408	[577,171,904,601]					716.095	245.215	263.095	508.31	1334.31	866.052	2200.36
3	1	0	23	12	757	761	[532,601,949,1027]					3813.9	245.256	338.505	583.761	967.283	23970.9	24938.2
3	1	0	23	13	553	937	[411,790,843,1078]					4600.06	247.539	360.115	607.654	1071.15	31355.7	32426.9
3	1	0	23	14	965	335	[892,248,1064,600]					3602.72	214.341	268.567	482.908	1600.88	32103	33703.9
3	1	0	24	1	187	21	[155,1,219,40]					443.159	200.207	206.596	406.803	341.128	345.444	686.572
3	1	0	24	2	240	21	[206,1,275,47]					364.783	203.923	204.511	408.434	884.901	379.522	1264.42
3	1	0	24	3	107	38	[102,34,113,51]					588.55	183.219	183.219	366.438	327.689	327.689	655.378
3	1	0	24	4	90	56	[77,50,101,67]					532.87	210.52	215.626	426.146	335.102	335.092	670.194
3	1	0	24	5	135	58	[125,50,142,65]					626.595	205.894	207.115	413.009	335.306	336.611	671.917
3	1	0	24	6	103	62	[94,56,116,76]					727.429	208.753	212.782	421.535	358.844	362.63	721.474
3	1	0	24	7	128	77	[109,42,164,102]					1033.83	213.293	219.563	432.856	368.005	367.727	735.732
3	1	0	24	8	947	80	[931,65,967,98]					416.263	199.656	201.657	401.313	340.719	346.707	687.426
3	1	0	24	9	251	61	[187,31,282,90]					631	209.361	219.408	428.769	1802.34	6356.2	8158.54
3	1	0	24	10	103	84	[84,71,113,97]					616.314	211.622	216.237	427.859	547.396	639.11	1186.51
3	1	0	24	11	299	95	[266,81,319,107]					506.18	221.722	220.247	441.969	909.144	2434.64	3343.78
3	1	0	24	12	260	103	[189,58,282,120]					440.12	212.53	224.337	436.867	3531.59	6570.23	10101.8
3	1	0	24	13	98	105	[63,96,114,118]					741.564	207.937	211.28	419.217	1074.17	397.32	1471.49
3	1	0	24	14	170	120	[108,93,189,137]					1073.38	214.09	231.681	445.771	405.684	377.843	783.527
3	1	0	24	15	103	128	[62,112,124,153]					1244.01	225.339	245.354	470.693	375.814	398.946	774.76
3	1	0	24	16	145	131	[129,116,163,152]					720.647	207.299	226.983	434.282	360.627	368.276	728.903
3	1	0	24	17	222	134	[166,71,256,173]					472.397	212.551	222.647	435.198	599.299	428.397	1027.7
3	1	0	24	18	940	159	[919,132,985,202]					397.719	203.863	212.615	416.478	351.381	357.531	708.912
3	1	0	24	19	172	157	[122,132,212,186]					521.811	206.874	214.943	421.817	434.904	425.858	860.762
3	1	0	24	20	272	172	[212,133,319,209]					440.366	225.152	224.497	449.649	458.25	487.109	945.359
3	1	0	24	21	365	169	[247,1,445,226]					428.217	229.003	237.217	466.22	686.832	517.217	1204.05
3	1	0	24	22	204	190	[187,181,219,202]					384.97	213.208	215.222	428.43	430.368	428.192	858.56
3	1	0	24	23	171	200	[124,174,201,223]					458.673	208.244	214.514	422.758	801.771	450.43	1252.2
3	1	0	24	24	733	91	[597,1,832,226]					365.245	229.978	247.306	477.284	441.449	475.439	916.888
3	1	0	24	25	649	228	[617,213,679,251]					420.419	245.058	246.935	491.993	478.685	487.935	966.62
3	1	0	24	26	497	297	[283,1,675,555]					603.218	247.294	254.509	501.803	531.506	587.864	1119.37
3	1	0	24	27	807	333	[642,77,994,592]					386.677	236.736	250.226	486.962	611.344	500.734	1112.08
3	1	0	24	28	968	433	[834,378,1022,492]					436.073	219.249	235.259	454.508	425.906	505.58	931.486
3	1	0	24	29	90	177	[52,138,131,221]					1917.13	225.101	251.716	476.817	393.236	389.623	782.859
3	1	0	24	30	329	560	[59,283,577,834]					9092.68	238.462	302.434	540.896	686.042	12715.8	13401.8
3	1	0	25	1	657	10	[642,1,680,24]					347.308	218.779	221.84	440.619	369.37	376.378	745.748
3	1	0	25	2	842	14	[828,1,870,28]					407.625	205.421	213.83	419.251	335	343.455	678.455
3	1	0	25	3	320	12	[286,1,341,29]					670.4	210.96	219.91	430.87	353.92	368.034	721.954
3	1	0	25	4	397	13	[373,1,434,36]					309.753	217.948	224.258	442.206	369.23	374.226	743.456
3	1	0	25	5	38	15	[32,9,45,22]					341.16	181.092	181.092	362.184	282.176	282.176	564.352
3	1	0	25	6	479	20	[454,1,504,52]					382.456	221.547	226.618	448.165	382.566	395.353	777.919
3	1	0	25	7	999	35	[993,25,1004,40]					340.198	189.786	189.786	379.572	305.802	305.802	611.604
3	1	0	25	8	896	32	[871,15,908,47]					399.908	200.357	204.853	405.21	327.603	339.927	667.53
3	1	0	25	9	1028	34	[1024,29,1038,39]					282.83	177.866	177.866	355.732	299.348	299.348	598.696
3	1	0	25	10	271	31	[239,1,298,65]					343.193	208.07	213.04	421.11	351.878	363.26	715.138
3	1	0	25	11	468	70	[420,1,505,121]					329.257	229.497	237.713	467.21	401.777	406.723	808.5
3	1	0	25	12	391	87	[329,1,442,141]					387.268	226.348	226.649	452.997	397.093	408.763	805.856
3	1	0	25	13	680	39	[607,1,728,78]					457.868	222.927	235.149	458.076	380.022	395.202	775.224
3	1	0	25	14	225	33	[189,2,284,99]					282.904	206.629	210.436	417.065	354.206	356.819	711.025
3	1	0	25	15	323	50	[289,17,363,99]					413.799	218.189	231.935	450.124	374.467	402.151	776.618
3	1	0	25	16	296	104	[133,42,332,148]					506.528	213.017	222.594	435.611	373.216	394.236	767.452
3	1	0	25	17	1044	105	[1039,101,1049,112]					335.451	188.011	188.011	376.022	314.802	314.802	629.604
3	1	0	25	18	878	90	[802,11,956,142]					391.896	211.697	231.781	443.478	360.788	389.781	750.569
3	1	0	25	19	666	116	[611,93,700,137]					407.839	235.996	239.645	475.641	418.786	427.847	846.633
3	1	0	25	20	1053	117	[1049,112,1060,128]					237.243	186.049	186.049	372.098	300.816	300.816	601.632
3	1	0	25	21	558	182	[410,1,844,319]					243.992	237.684	238.592	476.276	430.716	431.308	862.024
3	1	0	25	22	1000	173	[977,140,1014,196]					401.768	200.79	205.389	406.179	828.782	634.484	1463.27
3	1	0	25	23	933	154	[884,118,965,182]					422.422	207.601	219.652	427.253	369.681	387.593	757.274
3	1	0	25	24	920	193	[899,170,937,222]					343.377	211.409	216.648	428.057	388.363	388.631	776.994
3	1	0	25	25	1060	207	[1053,203,1065,212]					274.208	178.844	178.844	357.688	349.781	349.781	699.562
3	1	0	25	26	962	188	[924,151,1000,226]					324.977	203.972	212.261	416.233	584.244	398.409	982.653
3	1	0	25	27	860	204	[811,177,911,246]					304.714	222.855	235.388	458.243	435.18	465.888	901.068
3	1	0	25	28	745	259	[609,123,1039,346]					470.54	233.238	246.2	479.438	648.447	465.05	1113.5
3	1	0	25	29	63	281	[19,261,96,309]					381.291	200.141	197.6	397.741	362.671	374.609	737.28
3	1	0	25	30	1056	323	[1038,310,1076,335]					413.131	200.258	208.688	408.946	363.122	362.15	725.272
3	1	0	25	31	60	345	[39,327,119,396]					245.662	203.609	206.692	410.301	384.621	391.346	775.967
3	1	0	25	32	1031	363	[1024,357,1044,383]					336.526	199.108	202.742	401.85	735.714	856.67	1592.38
3	1	0	25	33	70	409	[30,359,129,438]					224.245	206.592	223.027	429.619	395.645	421.009	816.654
[truncated: 31,831 more rows]

## Sheet: 72hVIM-Phalloidin
Database Name	ODA			Cells		Media	columns
Database Link	http://localhost/ODA/OdaService.asmx			Row 2&3: C2C12		uncSFM	1&2
Evaluation GUID	4e649131-41b2-4503-95ba-8a267893833f			Row 6&7: MMM		uncSFM+10%AF	4&5
Plate Name	72h_C2C12-MMM_uncSFM-AF-coACCM-DMEM10FBS_Vim647-phalloidin488					coACCM	7&8
Measurement	Measurement1					DMEM10%FBS	10&11
Evaluation	Evaluation1
Population	Population - Nuclei
[Data]								DAPI	CellPhalloidin488	NuclPhalloidin488		CellVIM647	NuclVIM647
Row	Column	Timepoint	Field	Object No	X	Y	Bounding Box	Nuclei - Intensity Nucleus DAPI Mean	Nuclei - Intensity Cell Alexa 488 Mean	Nuclei - Intensity Nucleus Alexa 488 Mean	SUMphalloidin	Nuclei - Intensity Cell Alexa 647 Mean	Nuclei - Intensity Nucleus Alexa 647 Mean	sumVIM647
7	2	0	21	1	175	261	[154,185,197,283]	9468.69	289.442	360.602	650.044	12705.5	20153.7	32859.2
7	2	0	21	2	432	139	[282,1,734,356]	8427.85	232.345	299.99	532.335	1220.19	64922.3	66142.5
7	2	0	21	3	490	403	[306,267,653,528]	8257.12	246.827	292.31	539.137	1617.44	63411.1	65028.5
7	2	0	21	4	98	421	[39,354,134,531]	1130.64	226.439	316.751	543.19	3283.02	4340.37	7623.39
7	2	0	21	5	332	477	[210,286,469,628]	21509.7	238.973	438.05	677.023	2314.6	36591.8	38906.4
7	2	0	21	6	456	884	[427,789,473,928]	14782.2	588.565	634.985	1223.55	28099.7	36149.5	64249.2
7	2	0	21	7	277	872	[242,812,325,939]	8374.3	1181.76	1240.47	2422.23	52875.6	65535	118411
7	2	0	24	1	579	481	[532,460,598,502]	404.528	244.482	262.169	506.651	482.794	518.494	1001.29
7	2	0	24	2	707	741	[699,734,718,750]	841.915	272.085	272.085	544.17	717.767	717.767	1435.53
7	2	0	24	3	663	918	[567,684,780,1012]	646.812	238.515	268.34	506.855	681.649	1011.76	1693.41
7	2	0	24	4	892	618	[697,381,1078,1007]	2857.34	206.909	242.118	449.027	1086.18	9332.69	10418.9
7	2	0	20	1	907	139	[875,101,976,188]	222.606	195.752	204.117	399.869	363.557	393.649	757.206
7	2	0	20	2	950	165	[914,137,1015,200]	319.052	192.189	200.619	392.808	398.432	374.866	773.298
7	2	0	20	3	1030	184	[1024,178,1048,191]	198.872	176.477	176.477	352.954	707.041	707.041	1414.08
7	2	0	20	4	608	129	[470,1,822,265]	216.14	222.358	231.892	454.25	439.308	478.676	917.984
7	2	0	20	5	1022	263	[1010,254,1039,276]	293.476	189.975	195.291	385.266	345.619	352.767	698.386
7	2	0	20	6	655	463	[641,447,674,488]	231.781	242.33	242.082	484.412	534.354	533.898	1068.25
7	2	0	20	7	532	475	[316,399,610,556]	218.207	243.441	249.45	492.891	528.123	548.234	1076.36
7	2	0	20	8	649	494	[632,484,659,510]	275.097	246.974	246.754	493.728	552.376	553.035	1105.41
7	2	0	20	9	566	667	[509,619,631,769]	218.547	246.134	247.703	493.837	634.403	677.217	1311.62
7	2	0	20	10	1054	630	[1044,621,1063,642]	394.191	187.318	190.681	377.999	419.592	439.649	859.241
7	2	0	20	11	598	927	[429,673,934,1078]	217.857	231.727	237.611	469.338	500.308	573.673	1073.98
7	2	0	20	12	859	849	[721,720,1007,991]	216.569	214.121	236.284	450.405	494.641	568.524	1063.16
7	2	0	20	13	218	923	[192,907,231,939]	229.143	218.4	221.65	440.05	543.579	683.89	1227.47
7	2	0	20	14	142	862	[21,745,376,1078]	292.351	212.186	224.404	436.59	449.993	704.287	1154.28
7	2	0	20	15	1031	288	[1015,268,1056,306]	270.854	188.91	201.287	390.197	353.219	407	760.219
7	2	0	20	16	370	287	[190,10,781,467]	218.579	230.902	240.962	471.864	470.57	509.512	980.082
7	2	0	20	17	774	295	[576,216,867,493]	254.59	234.127	240.123	474.25	488.907	520.435	1009.34
7	2	0	20	18	617	470	[593,449,642,502]	256.958	245.98	246.837	492.817	551.519	558.643	1110.16
7	2	0	20	19	901	399	[695,294,1029,545]	220.898	219.155	235.033	454.188	448.806	494.149	942.955
7	2	0	20	20	614	515	[589,488,670,600]	268.015	246.936	248.999	495.935	571.812	577.451	1149.26
7	2	0	20	21	652	510	[638,491,669,557]	286.878	245.683	248.058	493.741	558.141	558.897	1117.04
7	2	0	20	22	811	596	[654,488,994,690]	233.383	226.743	241.532	468.275	497.492	525.477	1022.97
7	2	0	20	23	502	579	[435,522,751,723]	222.931	245.007	245.939	490.946	553.2	601.657	1154.86
7	2	0	20	24	341	668	[174,496,588,925]	236.351	235.763	245.079	480.842	498.312	531.231	1029.54
7	2	0	12	1	800	38	[759,1,839,79]	227.737	203.144	213.453	416.597	370.559	402.947	773.506
7	2	0	12	2	271	67	[174,1,337,129]	298.278	200.755	209.511	410.266	367.575	424.856	792.431
7	2	0	12	3	1049	70	[1044,64,1058,79]	262.377	170.906	170.906	341.812	334.522	334.522	669.044
7	2	0	12	4	98	81	[80,76,119,90]	228.031	186.241	181.198	367.439	343.963	364.719	708.682
7	2	0	12	5	803	99	[748,1,895,144]	259.552	205.858	216.411	422.269	411.906	433.337	845.243
7	2	0	12	6	1018	205	[990,167,1039,213]	219.75	187.467	183.087	370.554	364.806	350.827	715.633
7	2	0	12	7	952	259	[890,208,1010,316]	306.228	202.695	216.246	418.941	393.9	438.237	832.137
7	2	0	12	8	978	303	[934,267,1044,338]	245.077	201.06	211.299	412.359	385.039	402.41	787.449
7	2	0	12	9	898	324	[874,288,954,359]	248.028	211.399	219.275	430.674	411.512	464.477	875.989
7	2	0	12	10	1012	342	[988,312,1043,367]	276.872	193.268	206.771	400.039	371.312	389.22	760.532
7	2	0	12	11	959	365	[917,327,1022,419]	570.18	203.62	220.784	424.404	401.21	439.342	840.552
7	2	0	12	12	101	408	[30,357,132,447]	265.489	195.032	206.141	401.173	387.017	420.728	807.745
7	2	0	12	13	1037	567	[1019,538,1066,585]	464.038	209.116	268.379	477.495	409.024	480.8	889.824
7	2	0	12	14	1001	646	[934,606,1054,688]	216.546	197.737	210.583	408.32	469.072	412.472	881.544
7	2	0	12	15	795	729	[563,480,1017,1065]	236.688	223.425	218.183	441.608	439.133	575.785	1014.92
7	2	0	12	16	1061	762	[1036,757,1077,776]	323.205	185.387	184.898	370.285	398.087	410.524	808.611
7	2	0	12	17	48	790	[1,698,97,893]	250.661	198.392	195.696	394.088	379.866	573.723	953.589
7	2	0	12	18	948	974	[927,956,975,1001]	224.181	191.453	187.491	378.944	407.615	444.483	852.098
7	2	0	12	19	970	194	[959,180,986,208]	219.779	194.239	198.49	392.729	381.927	386.952	768.879
7	2	0	12	20	715	339	[552,69,1024,528]	267.804	223.911	218.931	442.842	486.517	444.982	931.499
7	2	0	18	1	727	105	[437,1,924,255]	217.045	216.33	211.874	428.204	413.493	395.269	808.762
7	2	0	18	2	927	31	[882,1,1022,71]	217.905	181.222	193.095	374.317	313.344	336.895	650.239
7	2	0	18	3	977	112	[746,15,1078,229]	245.879	192.213	193.305	385.518	362.874	350.126	713
7	2	0	18	4	87	93	[41,43,123,120]	426.194	178.425	195.29	373.715	335.872	364.14	700.012
7	2	0	18	5	575	185	[547,155,599,213]	227.108	230.71	228.135	458.845	462.061	467.858	929.919
7	2	0	18	6	525	206	[479,148,575,313]	225.776	234.845	232.759	467.604	468.943	465.689	934.632
7	2	0	18	7	620	202	[600,176,632,215]	239.108	232.433	234.484	466.917	473.554	467.413	940.967
7	2	0	18	8	577	251	[550,192,611,337]	248.706	236.831	236.05	472.881	474.288	472.484	946.772
7	2	0	18	9	243	123	[1,1,473,251]	317.181	199.873	215.143	415.016	398.747	457.771	856.518
7	2	0	18	10	1046	299	[1012,254,1069,328]	260.505	179.865	191.835	371.7	377.153	435.34	812.493
7	2	0	18	11	921	365	[669,164,1078,541]	359.882	207.787	211.097	418.884	435.394	610.201	1045.6
7	2	0	18	12	503	379	[475,341,571,418]	215.852	241.029	247.013	488.042	554.781	538.638	1093.42
7	2	0	18	13	590	449	[564,423,609,462]	216.357	246.921	248.964	495.885	491.764	493.29	985.054
7	2	0	18	14	542	460	[530,450,556,477]	215.464	246.378	246.378	492.756	493.743	493.743	987.486
7	2	0	18	15	543	492	[526,476,551,515]	217.14	246.77	246.77	493.54	499.65	499.65	999.3
7	2	0	18	16	475	493	[465,483,485,507]	216.368	241.92	242.97	484.89	498.45	495.846	994.296
7	2	0	18	17	622	510	[608,501,632,518]	216.687	250.399	250.399	500.798	491.915	491.915	983.83
7	2	0	18	18	172	557	[1,359,407,740]	281.297	209.47	203.813	413.283	425.03	426.407	851.437
7	2	0	18	19	543	520	[512,511,550,528]	217.406	249.192	249.192	498.384	500.989	500.989	1001.98
7	2	0	18	20	506	520	[487,514,512,527]	216.368	249.585	249.585	499.17	495.19	495.19	990.38
7	2	0	18	21	617	586	[607,576,649,606]	216.358	247.947	249.208	497.155	519.08	521.1	1040.18
7	2	0	18	22	586	598	[580,590,592,606]	216.655	247.814	247.814	495.628	592.662	592.662	1185.32
7	2	0	18	23	577	608	[567,594,591,618]	217.354	249.336	249.336	498.672	664.4	664.4	1328.8
7	2	0	18	24	616	610	[607,603,626,619]	220.514	248.673	248.673	497.346	650.875	650.875	1301.75
7	2	0	18	25	595	610	[588,604,620,626]	219.211	249.86	249.86	499.72	748.871	748.871	1497.74
7	2	0	18	26	1069	613	[1053,603,1078,626]	387.57	176.605	180.744	357.349	345.972	353.058	699.03
7	2	0	18	27	593	624	[581,615,608,634]	224.768	256.271	256.271	512.542	909.578	909.578	1819.16
7	2	0	18	28	564	629	[544,621,571,651]	216.451	250.366	250.366	500.732	866.625	866.625	1733.25
7	2	0	18	29	377	699	[351,621,411,743]	227.295	237.604	239.121	476.725	474.787	475.756	950.543
7	2	0	18	30	597	720	[591,714,608,736]	215.801	252.064	252.064	504.128	519.221	519.221	1038.44
7	2	0	18	31	233	860	[1,728,381,1078]	211.263	213.698	213.22	426.918	401.169	377.822	778.991
7	2	0	18	32	999	1040	[935,968,1075,1078]	195.735	174.369	168.823	343.192	299.748	288.707	588.455
7	2	0	18	33	382	995	[253,834,666,1078]	311.951	227.091	219.07	446.161	412.094	392.599	804.693
7	2	0	18	34	71	942	[1,737,151,1037]	193.236	191.223	201.481	392.704	350.193	361.481	711.674
7	2	0	18	35	625	166	[572,134,661,208]	247.873	231.161	231.233	462.394	456.248	467.161	923.409
7	2	0	18	36	654	248	[597,171,701,304]	219.874	234.38	235.711	470.091	475.118	471.254	946.372
7	2	0	18	37	607	437	[592,405,641,453]	216.508	243.006	245.021	488.027	482.247	482.303	964.55
7	2	0	18	38	764	462	[678,391,840,518]	218.839	233.973	231.04	465.013	472.741	459.628	932.369
7	2	0	18	39	573	489	[534,465,611,516]	218.452	248.701	249.013	497.714	499.061	499.464	998.525
7	2	0	18	40	517	498	[482,469,538,519]	233.117	246.028	247.677	493.705	502	502.061	1004.06
7	2	0	18	41	453	528	[417,486,486,574]	215.348	243.275	246.222	489.497	501.917	501.904	1003.82
7	2	0	18	42	607	541	[537,525,657,563]	216.162	249.841	250.491	500.332	507.578	508.743	1016.32
7	2	0	18	43	625	562	[595,548,648,578]	218.292	249.942	249.942	499.884	517.414	517.414	1034.83
7	2	0	18	44	584	564	[543,550,602,584]	216.819	249.576	249.576	499.152	528.234	528.234	1056.47
7	2	0	18	45	510	565	[473,542,548,581]	216.003	244.302	246.991	491.293	508.52	508.785	1017.31
7	2	0	18	46	598	591	[582,576,616,605]	219.898	250.365	250.365	500.73	627.111	627.111	1254.22
7	2	0	18	47	514	604	[481,580,579,630]	216.691	246.437	246.87	493.307	569.421	572.17	1141.59
7	2	0	18	48	540	628	[500,611,562,651]	215.949	247.488	248.388	495.876	743.309	748.478	1491.79
7	2	0	18	49	627	630	[551,617,654,653]	216.26	251.579	251.579	503.158	679.584	679.584	1359.17
7	2	0	18	50	917	664	[676,494,1078,947]	214.529	213.315	224.487	437.802	409.778	436.51	846.288
7	2	0	18	51	267	322	[1,168,484,428]	204.349	210.38	204.812	415.192	458.799	432.358	891.157
7	2	0	25	1	1025	18	[1005,1,1039,38]	6948.92	647.451	825.847	1473.3	35063.2	37366.6	72429.8
7	2	0	25	2	206	299	[90,85,351,454]	3149.01	219.258	260.909	480.167	1140.81	8491.81	9632.62
7	2	0	25	3	398	378	[193,184,549,540]	2773.75	235.651	262.864	498.515	1446.81	9921.65	11368.5
7	2	0	25	4	863	669	[666,512,1020,876]	745.162	217.104	226.276	443.38	484.092	440.19	924.282
7	2	0	25	5	1044	680	[1009,656,1072,771]	854.515	198.991	200.209	399.2	419.898	482.816	902.714
7	2	0	25	6	771	929	[745,891,797,958]	13633.7	507.632	760.086	1267.72	8215.21	13478.7	21693.9
7	2	0	25	7	996	15	[984,1,1014,37]	3884.22	303.408	230.393	533.801	28868.6	22747	51615.6
7	2	0	25	8	767	326	[549,50,1012,563]	2734.42	226.239	230.263	456.502	2053.44	15551.1	17604.5
7	2	0	25	9	60	485	[1,406,122,569]	7101.9	217.292	288.265	505.557	11213.8	61197.3	72411.1
7	2	0	25	10	310	626	[92,437,496,858]	5817.52	227.953	282.553	510.506	1224.06	7500.15	8724.21
7	2	0	17	1	682	13	[664,1,701,45]	223.037	210.078	219.78	429.858	372.987	382.193	755.18
7	2	0	17	2	648	60	[578,1,732,131]	420.561	220.693	245.949	466.642	402.933	424.173	827.106
7	2	0	17	3	173	84	[143,41,192,110]	441.942	194.181	201.684	395.865	503.706	1027.19	1530.9
7	2	0	17	4	124	94	[89,76,147,153]	202.402	191.267	188.124	379.391	355.246	358.918	714.164
7	2	0	17	5	150	104	[138,91,169,125]	310.991	194.646	198.071	392.717	368.192	374.616	742.808
7	2	0	17	6	54	125	[48,118,68,137]	261.716	183.982	183.195	367.177	381.215	394.521	775.736
7	2	0	17	7	398	174	[196,1,632,359]	250.234	257.366	252.926	510.292	462.024	471.649	933.673
7	2	0	17	8	682	214	[558,78,877,315]	301.546	230.698	239.052	469.75	445.533	474.34	919.873
7	2	0	17	9	465	278	[436,244,501,315]	417.844	249.827	259.067	508.894	474.812	513.2	988.012
7	2	0	17	10	452	316	[435,286,478,343]	490.129	245.688	252.362	498.05	469.638	488.966	958.604
7	2	0	17	11	518	276	[459,245,573,346]	350.803	245.488	255.115	500.603	474.089	494.796	968.885
7	2	0	17	12	538	315	[519,282,583,359]	365.457	244.439	257.913	502.352	479.866	502.478	982.344
7	2	0	17	13	430	432	[229,295,686,540]	270.11	241.545	249.634	491.179	490.198	478.103	968.301
7	2	0	17	14	25	328	[14,320,40,356]	312.323	185.159	182.298	367.457	697.168	984.015	1681.18
7	2	0	17	15	56	465	[14,437,104,489]	265.124	195.326	203.888	399.214	402.512	413.91	816.422
7	2	0	17	16	818	455	[793,436,827,484]	247.022	228.065	226.582	454.647	450.756	454.923	905.679
7	2	0	17	17	14	514	[1,488,33,548]	363.364	189.98	196.374	386.354	569.887	991.037	1560.92
7	2	0	17	18	809	594	[782,570,828,615]	251.852	230.064	228.287	458.351	506.245	536.23	1042.47
7	2	0	17	19	27	664	[7,646,42,682]	228.816	192.058	196.787	388.845	367.19	365.669	732.859
7	2	0	17	20	188	702	[54,597,317,813]	253.2	213.53	233.613	447.143	427.157	453.6	880.757
7	2	0	17	21	257	571	[109,533,364,630]	268.098	219.259	233.196	452.455	569.189	481.608	1050.8
7	2	0	17	22	943	347	[834,245,1071,449]	514.302	718.009	897.937	1615.95	545.404	597.696	1143.1
7	2	0	17	23	606	629	[376,301,970,914]	506.257	241.82	258.906	500.726	468.747	487.826	956.573
7	2	0	22	1	759	939	[551,705,937,1078]	4807.22	228.458	261.154	489.612	1005.95	4634.26	5640.21
7	2	0	22	2	536	828	[508,789,639,1037]	965.068	237.158	232.406	469.564	589.495	521.359	1110.85
7	2	0	22	3	610	1033	[535,885,628,1078]	874.937	227.681	234.968	462.649	711.466	1679.71	2391.18
7	2	0	22	4	465	935	[342,812,612,1078]	724.526	233.071	228.405	461.476	557.856	704.361	1262.22
7	2	0	22	5	347	1024	[263,971,597,1078]	684.78	217.314	224.538	441.852	446.731	518.952	965.683
7	2	0	9	1	1039	31	[1027,22,1049,40]	396.888	175.805	175.805	351.61	328.71	328.71	657.42
7	2	0	9	2	1038	45	[1030,39,1045,53]	366.848	179.127	179.127	358.254	327.861	327.861	655.722
7	2	0	9	3	1070	49	[1047,40,1077,67]	321.855	172.126	172.126	344.252	314.581	314.581	629.162
7	2	0	9	4	1036	69	[1026,58,1048,90]	329.358	176.834	176.834	353.668	327.169	327.169	654.338
7	2	0	9	5	1001	76	[984,66,1019,90]	364.051	184.039	184.604	368.643	343.086	349.387	692.473
7	2	0	9	6	655	77	[610,1,704,130]	703.871	216.741	234.583	451.324	429.423	489.504	918.927
7	2	0	9	7	584	49	[517,1,669,142]	329.11	218.83	233.98	452.81	423.47	463.08	886.55
7	2	0	9	8	319	82	[204,1,406,170]	515.943	209.269	241.657	450.926	431.702	528.41	960.112
7	2	0	9	9	827	100	[702,1,933,201]	476.515	207.926	234.223	442.149	427.424	479.438	906.862
7	2	0	9	10	114	224	[62,182,152,263]	264.613	194.265	199.559	393.824	554.285	434.839	989.124
7	2	0	9	11	208	185	[120,95,305,264]	641.231	207.576	239.701	447.277	472.238	611.726	1083.96
7	2	0	9	12	993	310	[952,271,1040,360]	246.541	193.746	204.443	398.189	410.497	422.792	833.289
7	2	0	9	13	91	300	[55,277,107,320]	520.691	193.275	205.691	398.966	407.266	422.382	829.648
7	2	0	9	14	76	349	[58,331,119,376]	339.703	193.685	196.455	390.14	419.005	474.317	893.322
7	2	0	9	15	224	365	[147,323,293,428]	364.708	218.655	233.238	451.893	482.652	555.454	1038.11
7	2	0	9	16	309	421	[235,341,339,485]	318.759	228.708	236.741	465.449	472.69	495.319	968.009
7	2	0	9	17	957	414	[900,373,1014,474]	286.174	203.855	220.087	423.942	505.541	574.63	1080.17
7	2	0	9	18	150	397	[72,329,204,484]	621.873	211.698	271.766	483.464	459.711	516.988	976.699
7	2	0	9	19	135	446	[117,429,148,468]	419.402	213.133	223.125	436.258	450.105	452.866	902.971
7	2	0	9	20	227	445	[185,392,268,489]	339.112	220.763	234.589	455.352	486.228	496.692	982.92
7	2	0	9	21	259	430	[245,411,296,464]	255.06	225.772	228.121	453.893	487.398	497.879	985.277
7	2	0	9	22	117	463	[105,442,131,481]	504.824	315.44	223.273	538.713	453.918	461.762	915.68
7	2	0	9	23	51	486	[12,438,73,520]	339.63	194.119	202.938	397.057	411.315	437.506	848.821
7	2	0	9	24	89	481	[57,455,121,504]	642.507	202.408	227.81	430.218	426.533	469.838	896.371
7	2	0	9	25	7	491	[1,484,20,524]	341.069	193.495	206.059	399.554	409.38	421.297	830.677
7	2	0	9	26	60	519	[23,500,115,546]	456.835	197.335	214.471	411.806	421.107	489.884	910.991
7	2	0	9	27	158	527	[56,457,283,604]	607.194	214.548	234.2	448.748	469.419	505.542	974.961
7	2	0	9	28	1010	576	[989,555,1039,612]	283.397	193.296	203.57	396.866	495.389	518.372	1013.76
7	2	0	9	29	1075	611	[1067,604,1078,618]	244.876	172.031	172.031	344.062	430.753	430.753	861.506
7	2	0	9	30	985	629	[941,585,1040,666]	311.344	197.602	207.903	405.505	555.576	591.065	1146.64
7	2	0	9	31	36	620	[2,594,66,649]	522.992	193.256	203.189	396.445	408.938	435.827	844.765
7	2	0	9	32	234	626	[198,599,272,670]	367.21	220.384	229.114	449.498	496.401	518.562	1014.96
7	2	0	9	33	1061	630	[1052,625,1071,637]	202.667	184.969	183.657	368.626	438.581	427.637	866.218
7	2	0	9	34	123	642	[31,588,206,700]	361.923	205.716	217.692	423.408	488.112	487.562	975.674
7	2	0	9	35	364	675	[303,627,483,758]	307.063	239.033	239.775	478.808	495.155	528.028	1023.18
7	2	0	9	36	167	675	[137,638,215,701]	454.512	211.477	222.667	434.144	462.038	514.423	976.461
7	2	0	9	37	277	662	[185,588,315,700]	706.418	225.289	247.014	472.303	505.404	586.192	1091.6
7	2	0	9	38	947	681	[912,632,1026,727]	429.209	203.8	213.628	417.428	546.21	770.519	1316.73
7	2	0	9	39	308	693	[284,677,346,721]	473.965	234.072	242.165	476.237	511.498	525.887	1037.38
7	2	0	9	40	1042	710	[1028,683,1054,719]	250.59	188.038	186.402	374.44	419.079	420.077	839.156
7	2	0	9	41	989	713	[963,698,1024,739]	389.54	199.692	211.035	410.727	456.796	505.257	962.053
7	2	0	9	42	1049	732	[1042,725,1057,743]	347.651	186.449	186.446	372.895	427.507	430.012	857.519
7	2	0	9	43	1026	731	[996,712,1042,742]	457.369	195.218	201.503	396.721	430.928	500.84	931.768
7	2	0	9	44	1037	746	[1030,739,1054,754]	498.031	197.9	200.177	398.077	464.661	461.781	926.442
7	2	0	9	45	1017	747	[1001,736,1036,767]	656.508	207.75	216.471	424.221	773.74	848.363	1622.1
7	2	0	9	46	238	723	[65,681,349,791]	375.811	221.681	241.916	463.597	534.727	647.305	1182.03
7	2	0	9	47	1055	760	[1045,750,1065,776]	398.933	184.996	184.527	369.523	473.75	470.406	944.156
7	2	0	9	48	1002	773	[967,753,1031,806]	518.06	198.062	207.912	405.974	493.878	535.062	1028.94
7	2	0	9	49	1035	770	[1026,761,1051,783]	405.947	190.911	192.55	383.461	533.08	536.53	1069.61
7	2	0	9	50	927	787	[890,752,1001,828]	364.841	204.141	221.257	425.398	440.3	485.522	925.822
7	2	0	9	51	235	787	[158,740,276,827]	693.298	224.675	254.774	479.449	552.807	531.543	1084.35
7	2	0	9	52	48	851	[13,812,70,912]	521.926	194.105	213.176	407.281	442.331	442.625	884.956
7	2	0	9	53	831	857	[725,678,976,1036]	540.254	218.912	247.322	466.234	481.085	1028.01	1509.1
7	2	0	9	54	122	929	[62,866,177,989]	688.968	202.362	229.694	432.056	478.414	510.766	989.18
7	2	0	9	55	347	939	[309,893,372,986]	747.937	232.797	256.627	489.424	451.527	493.549	945.076
7	2	0	9	56	299	938	[279,921,335,960]	367.386	228.999	231.406	460.405	448.388	445.287	893.675
7	2	0	9	57	264	998	[191,942,329,1078]	262.545	215.734	231.559	447.293	404.476	434.888	839.364
7	2	0	9	58	804	985	[773,952,933,1049]	242.636	210.673	221.053	431.726	423.991	434.28	858.271
7	2	0	9	59	447	1010	[358,934,605,1078]	521.435	227.118	247.304	474.422	427.913	470.804	898.717
7	2	0	9	60	81	989	[54,972,117,1012]	256.991	191.785	196.418	388.203	375.534	370.309	745.843
7	2	0	9	61	195	1001	[111,978,223,1075]	338.106	200.753	219.16	419.913	407.753	442.66	850.413
7	2	0	9	62	166	1017	[147,1004,180,1033]	348.773	203.559	223.75	427.309	427.018	442.761	869.779
7	2	0	9	63	870	1040	[826,993,930,1078]	319.392	199.192	214.856	414.048	390.125	390.475	780.6
7	2	0	9	64	70	1022	[54,1007,92,1040]	609.187	195.447	199.146	394.593	403.147	417.591	820.738
7	2	0	9	65	42	1037	[27,1029,61,1050]	378.165	183.563	181.981	365.544	343.026	343.427	686.453
7	2	0	9	66	92	1041	[59,1014,108,1070]	500.639	193.021	197.187	390.208	389.68	397.355	787.035
7	2	0	9	67	649	1043	[550,1008,729,1078]	388.463	220.795	240.042	460.837	405.643	428.116	833.759
7	2	0	9	68	46	1053	[38,1044,51,1063]	273.191	194.456	196.868	391.324	359.148	368.551	727.699
7	2	0	9	69	766	1065	[730,1049,781,1078]	401.717	209.359	215.891	425.25	379.446	387.641	767.087
7	2	0	9	70	85	1072	[77,1067,92,1078]	287.301	181.23	181.23	362.46	415.522	415.522	831.044
7	2	0	9	71	990	744	[966,726,1013,759]	325.632	199.947	203.981	403.928	579.629	471.255	1050.88
7	2	0	9	72	263	935	[163,902,293,985]	236.155	220.466	228.124	448.59	439.912	483.196	923.108
7	2	0	9	73	499	252	[188,1,812,488]	291.022	232.545	243.1	475.645	496.734	494.521	991.255
7	2	0	9	74	486	560	[125,420,661,671]	405.536	241.683	238.287	479.97	541.194	503.728	1044.92
7	2	0	9	75	536	818	[87,664,704,1078]	477.484	237.29	284.297	521.587	526.716	780.834	1307.55
7	2	0	7	1	427	37	[413,24,437,50]	238.7	208.287	210.422	418.709	391.075	400.889	791.964
7	2	0	7	2	452	23	[370,1,481,69]	544.341	208.041	221.317	429.358	385.175	448.039	833.214
7	2	0	7	3	547	28	[515,1,585,63]	275.587	210.226	222.565	432.791	385.08	393.761	778.841
7	2	0	7	4	64	58	[58,52,71,65]	312.424	175.826	175.826	351.652	313.402	313.402	626.804
7	2	0	7	5	125	57	[117,47,134,66]	291.536	189.128	192.455	381.583	364.396	374.018	738.414
7	2	0	7	6	478	75	[440,21,503,112]	316.181	217.077	225.716	442.793	408.868	438.819	847.687
7	2	0	7	7	332	41	[252,1,413,107]	475.533	203.579	225.667	429.246	372.253	430.933	803.186
7	2	0	7	8	395	93	[383,57,423,113]	288.102	214.84	220.539	435.379	409.148	411.023	820.171
7	2	0	7	9	929	100	[898,68,1006,138]	240.006	190.595	195.454	386.049	340.052	354.782	694.834
7	2	0	7	10	72	92	[67,87,78,97]	379.968	178.968	178.968	357.936	4650.82	4650.82	9301.64
7	2	0	7	11	502	21	[472,1,532,104]	301.259	212.482	226.167	438.649	395.401	429.426	824.827
7	2	0	7	12	37	100	[33,96,45,106]	239.838	183.798	183.798	367.596	318.404	318.404	636.808
7	2	0	7	13	136	104	[106,91,146,116]	336.146	186.879	189.271	376.15	338.853	359.188	698.041
7	2	0	7	14	133	127	[117,111,169,142]	346.017	191.613	197.426	389.039	353.123	370.661	723.784
7	2	0	7	15	333	111	[210,14,435,178]	319.951	210.738	225.147	435.885	395.8	450.393	846.193
7	2	0	7	16	558	92	[420,1,624,167]	417.5	220.962	236.233	457.195	420.682	463.289	883.971
7	2	0	7	17	87	141	[76,134,94,153]	265.685	188.477	192.371	380.848	334.326	339.629	673.955
7	2	0	7	18	159	145	[138,132,170,156]	376.667	193.829	196.675	390.504	375.61	399.479	775.089
7	2	0	7	19	138	159	[123,151,163,170]	269.403	192.585	193.075	385.66	366.524	368.269	734.793
7	2	0	7	20	136	200	[108,163,190,229]	286.013	194.815	202.195	397.01	384.547	427.758	812.305
7	2	0	7	21	122	175	[105,155,145,192]	375.102	189.041	197.277	386.318	366.771	398.735	765.506
7	2	0	7	22	92	196	[78,166,107,208]	322.088	186.878	185.659	372.537	348.505	349.541	698.046
7	2	0	7	23	222	182	[179,144,253,212]	234.991	204.696	204.821	409.517	401.927	412.624	814.551
7	2	0	7	24	172	189	[152,176,202,203]	318.79	198.401	203.154	401.555	397.264	411.965	809.229
7	2	0	7	25	178	205	[160,188,216,215]	288.063	200.53	203.69	404.22	408.235	424.944	833.179
7	2	0	7	26	195	215	[176,207,208,231]	359.418	202.967	208.896	411.863	412.723	434.873	847.596
7	2	0	7	27	156	226	[88,200,178,257]	219.607	194.363	203.798	398.161	387.558	402.663	790.221
7	2	0	7	28	68	255	[51,224,93,276]	292.4	187.267	184.54	371.807	357.871	364.05	721.921
7	2	0	7	29	177	372	[116,353,201,403]	467.179	204.719	231.321	436.04	415.076	445.567	860.643
7	2	0	7	30	936	395	[881,360,1030,428]	304.01	203.576	215.66	419.236	387.417	419.49	806.907
7	2	0	7	31	1027	385	[1008,368,1038,398]	308.007	188.85	191.823	380.673	347.861	364.823	712.684
7	2	0	7	32	60	387	[22,344,82,415]	389.891	189.981	201.03	391.011	372.21	402.475	774.685
7	2	0	7	33	275	431	[187,357,307,476]	265.158	218.432	229.758	448.19	447.5	478.737	926.237
7	2	0	7	34	105	396	[70,358,148,449]	416.91	196.537	210.369	406.906	400.712	466.135	866.847
7	2	0	7	35	208	422	[137,387,249,447]	508.411	209.796	229.421	439.217	441.458	465.617	907.075
7	2	0	7	36	95	448	[25,411,135,479]	253.028	197.631	269.306	466.937	392.302	453.028	845.33
7	2	0	7	37	159	473	[28,423,197,540]	297.727	201.252	213	414.252	425.208	431.927	857.135
7	2	0	7	38	191	523	[133,422,238,552]	465.839	209.954	231.643	441.597	439.63	485.33	924.96
7	2	0	7	39	1064	575	[1058,566,1072,584]	255.905	178.238	178.238	356.476	328.929	328.929	657.858
7	2	0	7	40	39	565	[1,525,67,614]	224.695	190.201	194.632	384.833	387.34	426.389	813.729
7	2	0	7	41	45	644	[6,615,64,670]	315.676	193.26	198.657	391.917	402.637	455.63	858.267
7	2	0	7	42	79	653	[55,628,128,684]	460.716	200.844	218.368	419.212	427.852	472.137	899.989
7	2	0	7	43	73	694	[33,662,118,728]	827.902	198.802	219.754	418.556	421.675	485.812	907.487
7	2	0	7	44	971	666	[931,640,1023,696]	231.222	201.766	211.122	412.888	381.858	418.267	800.125
7	2	0	7	45	27	688	[1,662,54,727]	341.746	191.048	206.619	397.667	411.183	430.119	841.302
7	2	0	7	46	81	761	[22,711,114,815]	379.609	197.996	209.361	407.357	412.527	459.05	871.577
7	2	0	7	47	30	757	[14,739,56,774]	267.88	193.639	192.519	386.158	371.644	384.157	755.801
7	2	0	7	48	204	796	[103,772,282,824]	362.211	215.641	237.571	453.212	498.046	572.612	1070.66
7	2	0	7	49	339	885	[248,806,420,1064]	400.832	231.933	243.712	475.645	572.534	565.976	1138.51
7	2	0	7	50	258	830	[231,812,274,852]	413.257	228.439	240.073	468.512	562.278	617.57	1179.85
7	2	0	7	51	280	834	[269,823,289,850]	299.463	232.41	235.731	468.141	589.6	613.037	1202.64
7	2	0	7	52	141	869	[56,805,220,951]	664.365	204.958	243.091	448.049	420.228	537.916	958.144
7	2	0	7	53	232	841	[213,813,245,854]	349.778	223.936	229.535	453.471	516.795	545.101	1061.9
7	2	0	7	54	248	855	[235,839,262,871]	440.828	230.417	236.503	466.92	600.369	579.687	1180.06
7	2	0	7	55	249	911	[115,842,297,953]	317.62	219.304	235.058	454.362	508.287	597.015	1105.3
7	2	0	7	56	227	860	[215,844,243,870]	310.933	224.053	228.808	452.861	505.15	528.875	1034.03
7	2	0	7	57	1011	868	[996,853,1038,896]	199.95	184.474	182.511	366.985	429.119	494.144	923.263
7	2	0	7	58	199	894	[174,869,238,917]	238.037	217.129	222.385	439.514	456.894	497.33	954.224
7	2	0	7	59	988	918	[973,898,1004,958]	200	189.733	186.871	376.604	367.876	449.605	817.481
7	2	0	7	60	197	944	[188,929,221,963]	241.84	213.146	215.426	428.572	506.815	597.638	1104.45
7	2	0	7	61	209	1018	[135,927,273,1078]	220.781	206.322	214.323	420.645	494.353	779.058	1273.41
7	2	0	7	62	147	972	[109,933,200,1010]	217.689	203.339	208.356	411.695	422.733	620.411	1043.14
7	2	0	7	63	338	975	[282,947,370,1051]	280.271	223.178	227.521	450.699	565.973	686.604	1252.58
7	2	0	7	64	272	1001	[246,959,328,1042]	547.732	220.636	237.512	458.148	670.366	550.416	1220.78
7	2	0	7	65	85	989	[37,960,141,1058]	365.841	191.603	207.402	399.005	356.498	374.29	730.788
7	2	0	7	66	292	1051	[250,1006,341,1078]	485.516	210.393	229.262	439.655	412.786	475.365	888.151
7	2	0	7	67	1048	1012	[1043,1008,1065,1016]	236.747	171.89	171.89	343.78	302.945	302.945	605.89
7	2	0	7	68	683	1042	[628,1006,770,1078]	224.461	214.895	215.294	430.189	381.753	379.951	761.704
7	2	0	7	69	182	144	[162,109,201,165]	264.844	194.889	202.165	397.054	373.288	390.55	763.838
7	2	0	7	70	445	310	[152,35,787,488]	235.344	230.448	235.451	465.899	453.008	456.043	909.051
7	2	0	7	71	740	521	[474,263,1013,911]	260.118	232.301	238.086	470.387	459.916	466.172	926.088
7	2	0	7	72	373	652	[82,476,590,961]	257.37	231.809	238.001	469.81	542.802	572.781	1115.58
7	2	0	14	1	736	37	[622,1,824,82]	519.76	226.274	220.589	446.863	393.962	414.823	808.785
7	2	0	14	2	142	17	[123,1,162,32]	273.526	182.963	190.484	373.447	410.081	481.653	891.734
7	2	0	14	3	550	33	[510,1,625,89]	311.146	215.296	223.715	439.011	399.13	413.431	812.561
7	2	0	14	4	108	44	[65,14,146,76]	270.906	179.397	189.135	368.532	394.335	475.875	870.21
7	2	0	14	5	642	34	[629,24,654,51]	426.985	222.763	226.686	449.449	405.819	416.599	822.418
7	2	0	14	6	609	39	[603,32,617,54]	438.053	227.319	233.973	461.292	424.898	449.54	874.438
7	2	0	14	7	623	46	[613,20,632,57]	412.38	223.087	230.197	453.284	406.231	427.768	833.999
7	2	0	14	8	675	52	[652,33,694,76]	304.79	228.864	233.097	461.961	405.143	411.969	817.112
7	2	0	14	9	611	73	[586,37,630,174]	307.412	224.765	223.427	448.192	423.829	407.74	831.569
7	2	0	14	10	151	46	[123,19,171,77]	258.319	186.571	196.066	382.637	420.848	525.462	946.31
7	2	0	14	11	643	59	[619,32,667,77]	566.875	226.005	232.499	458.504	411.655	423.971	835.626
7	2	0	14	12	189	36	[143,1,217,97]	467.156	190.512	199.987	390.499	367.654	372.922	740.576
7	2	0	14	13	556	139	[518,43,604,244]	629.866	229.117	238.874	467.991	445.35	460.087	905.437
7	2	0	14	14	698	65	[693,61,703,74]	488.513	256.957	256.957	513.914	447.59	447.59	895.18
7	2	0	14	15	654	157	[609,73,702,203]	492.751	229.687	237.96	467.647	440.205	462.623	902.828
7	2	0	14	16	669	83	[650,69,688,118]	385.323	234.026	238.513	472.539	422.683	428.923	851.606
7	2	0	14	17	981	72	[915,9,1025,113]	489.919	183.739	208.569	392.308	371.455	466.301	837.756
7	2	0	14	18	185	106	[154,92,206,120]	293.75	194.169	199.56	393.729	401.701	432.5	834.201
7	2	0	14	19	123	104	[41,65,175,149]	323.69	185.065	201.661	386.726	450.227	428.315	878.542
7	2	0	14	20	680	133	[670,111,701,144]	344.287	240.909	247.274	488.183	444.88	458.177	903.057
7	2	0	14	21	637	256	[572,172,681,346]	294.5	238.335	235.596	473.931	459.574	459.585	919.159
7	2	0	14	22	266	196	[3,1,491,368]	349.992	210.842	217.492	428.334	434.609	442.977	877.586
7	2	0	14	23	899	254	[865,198,933,290]	449.244	204.897	210.724	415.621	423.614	519.78	943.394
7	2	0	14	24	983	238	[911,196,1043,284]	456.987	191.893	212.484	404.377	394.953	409.569	804.522
7	2	0	14	25	1070	235	[1064,228,1078,258]	218.713	164.92	164.92	329.84	500.941	500.941	1001.88
7	2	0	14	26	87	321	[68,303,111,348]	248.775	193.783	198.922	392.705	395.484	416.969	812.453
7	2	0	14	27	170	368	[1,275,397,443]	425.776	208.725	222.112	430.837	448.932	456.04	904.972
7	2	0	14	28	25	349	[1,312,51,388]	371.862	183.096	195.371	378.467	376.248	400.578	776.826
7	2	0	14	29	55	365	[20,343,71,411]	398.458	191.566	198.547	390.113	393.596	410.776	804.372
7	2	0	14	30	12	394	[1,379,27,418]	363.471	184.296	187.041	371.337	1452.86	4312.86	5765.72
7	2	0	14	31	71	406	[39,384,90,431]	262.043	197.502	203.511	401.013	401.616	401.667	803.283
7	2	0	14	32	23	422	[1,408,47,440]	430.539	190.816	200.284	391.1	393.867	412.112	805.979
7	2	0	14	33	973	419	[667,340,1078,512]	379.801	206.27	225.429	431.699	436.474	488.814	925.288
7	2	0	14	34	34	445	[24,420,59,467]	566.316	203.029	212.883	415.912	427.862	461.5	889.362
7	2	0	14	35	16	469	[1,430,33,513]	528.781	190.588	201.364	391.952	389.6	423.217	812.817
7	2	0	14	36	61	447	[37,421,91,511]	386.915	199.307	208.398	407.705	414.298	448.786	863.084
7	2	0	14	37	781	453	[724,433,859,476]	298.443	232.191	229.918	462.109	482.726	497.246	979.972
7	2	0	14	38	329	452	[160,380,481,525]	568.217	231.548	233.058	464.606	566.746	532.819	1099.57
7	2	0	14	39	881	470	[682,438,948,522]	412.632	225.27	231.763	457.033	477.145	582.825	1059.97
7	2	0	14	40	46	500	[17,463,71,530]	424.107	193.891	201.126	395.017	403.737	423.408	827.145
7	2	0	14	41	127	445	[72,407,164,518]	325.943	204.35	213.162	417.512	434.103	431.819	865.922
7	2	0	14	42	264	508	[201,482,314,540]	446.146	226.722	239.437	466.159	527.131	540.825	1067.96
7	2	0	14	43	898	529	[863,501,926,566]	471.389	219.118	223.316	442.434	481.287	505.508	986.795
7	2	0	14	44	321	616	[44,456,468,719]	470.406	224.969	222.827	447.796	536.828	472.128	1008.96
7	2	0	14	45	153	571	[96,555,173,595]	342.483	206.542	240.669	447.211	431.064	476.636	907.7
7	2	0	14	46	989	549	[916,464,1078,628]	375.9	195.464	217.421	412.885	385.059	500.114	885.173
7	2	0	14	47	849	553	[710,497,911,625]	529.167	227.028	230.861	457.889	498.128	552.924	1051.05
7	2	0	14	48	915	580	[902,564,937,600]	467.432	213.803	219.282	433.085	510.638	528.725	1039.36
7	2	0	14	49	898	584	[888,575,915,603]	473.622	215.933	220.204	436.137	499.523	496.959	996.482
7	2	0	14	50	12	588	[1,562,27,602]	248.906	186.909	187.556	374.465	397.393	396.179	793.572
7	2	0	14	51	250	738	[111,582,314,811]	429.6	221.546	222.421	443.967	472.06	465.695	937.755
7	2	0	14	52	29	604	[1,575,42,622]	421.277	192.762	204.298	397.06	402.114	422.21	824.324
7	2	0	14	53	993	638	[922,592,1070,690]	503.232	195.582	218.966	414.548	389.428	514.03	903.458
7	2	0	14	54	87	593	[1,511,116,637]	251.965	197.43	213.351	410.781	413.712	415.342	829.054
7	2	0	14	55	47	590	[7,572,62,631]	439.702	200.311	217.506	417.817	412.23	452.343	864.573
7	2	0	14	56	881	661	[711,595,1071,777]	433.204	213.047	220.398	433.445	452.458	495.852	948.31
7	2	0	14	57	62	614	[54,602,79,631]	459.567	218.519	222.408	440.927	424.371	432.992	857.363
7	2	0	14	58	45	632	[22,621,57,648]	416.127	213.496	221.92	435.416	425.507	438.695	864.202
7	2	0	14	59	62	634	[55,626,69,644]	502.566	227.892	230.147	458.039	431.158	435.868	867.026
7	2	0	14	60	105	647	[69,624,132,667]	308.006	218.434	222.238	440.672	421.992	425.291	847.283
7	2	0	14	61	59	650	[51,639,82,660]	522.324	225.493	226.994	452.487	444.443	449.454	893.897
7	2	0	14	62	23	662	[1,619,63,711]	384.691	205.11	223.717	428.827	402.734	423.053	825.787
7	2	0	14	63	46	721	[1,651,144,923]	467.26	200.863	219.089	419.952	376.474	415.691	792.165
7	2	0	14	64	814	741	[722,679,887,811]	414.59	231.172	234.604	465.776	526.372	481.425	1007.8
7	2	0	14	65	955	795	[682,699,1059,939]	227.843	215.201	211.826	427.027	438.216	450.061	888.277
7	2	0	14	66	971	927	[878,879,1049,1024]	488.046	226.683	245.74	472.423	369.956	385.296	755.252
7	2	0	14	67	169	973	[1,865,353,1078]	198.195	202.095	190.517	392.612	398.242	625.389	1023.63
7	2	0	14	68	632	983	[426,831,1004,1078]	293.886	222.209	219.971	442.18	505.725	382.393	888.118
7	2	0	14	69	707	99	[682,83,714,111]	318.29	246.724	258.121	504.845	432.898	447.131	880.029
7	2	0	14	70	1007	313	[682,254,1077,430]	563.931	210.462	233.471	443.933	406.788	900.029	1306.82
7	2	0	14	71	873	141	[673,1,1044,280]	409.699	210.951	212.671	423.622	432.862	1125.29	1558.15
7	2	0	14	72	440	99	[237,1,542,276]	218.985	218.556	219.523	438.079	432.762	408.008	840.77
7	2	0	14	73	578	221	[505,186,613,344]	293.417	239.323	247.95	487.273	465.688	481.26	946.948
7	2	0	14	74	752	327	[609,242,920,409]	223.92	230.723	223.858	454.581	447.078	434.835	881.913
7	2	0	14	75	756	598	[627,507,844,699]	314.35	239.679	230.325	470.004	490.111	515.248	1005.36
7	2	0	2	1	145	14	[131,1,165,33]	352.309	186.726	185.8	372.526	358.956	342.121	701.077
7	2	0	2	2	329	21	[297,1,461,42]	361.348	205.43	199.614	405.044	578.128	1199.32	1777.45
7	2	0	2	3	854	120	[710,1,1002,320]	336.086	205.325	194.579	399.904	396.121	371.487	767.608
7	2	0	2	4	274	30	[235,1,309,66]	432.875	200.784	215.667	416.451	533.992	1257.63	1791.62
7	2	0	2	5	183	79	[152,18,223,109]	15495.7	843.635	1397.36	2240.99	2438.21	4638.33	7076.54
7	2	0	2	6	340	128	[235,14,456,228]	347.449	215.36	225.18	440.54	509.005	611.034	1120.04
7	2	0	2	7	595	175	[427,1,779,366]	331.957	227.26	240.387	467.647	498.83	459.301	958.131
7	2	0	2	8	89	112	[52,88,108,135]	459.676	196.056	199.172	395.228	508.106	426.52	934.626
7	2	0	2	9	144	176	[65,107,204,224]	503.231	192.924	192.648	385.572	473.824	459.472	933.296
7	2	0	2	10	114	261	[53,215,158,328]	324.972	194.811	205.028	399.839	476.67	831.093	1307.76
7	2	0	2	11	171	349	[44,195,264,537]	304.699	206.009	206.979	412.988	487.37	784.103	1271.47
7	2	0	2	12	427	349	[220,200,636,547]	312.019	233.249	242.877	476.126	480.735	481.896	962.631
7	2	0	2	13	454	618	[234,446,648,761]	353.885	238.602	244.15	482.752	497.333	578.77	1076.1
7	2	0	2	14	122	746	[1,503,240,950]	363.347	205.435	203.52	408.955	420.679	392.327	813.006
7	2	0	2	15	726	748	[533,461,938,980]	465.99	236.35	257	493.35	463.709	714.922	1178.63
7	2	0	2	16	422	910	[200,740,676,1078]	393.212	232.792	242.904	475.696	447.224	701.135	1148.36
7	2	0	13	1	378	40	[299,1,422,97]	624.282	215.108	234.89	449.998	433.339	510.282	943.621
7	2	0	13	2	287	79	[165,1,378,159]	650.692	210.431	232.341	442.772	422.852	508.742	931.594
7	2	0	13	3	32	144	[25,134,40,154]	670.04	190.017	190.802	380.819	413.838	403.349	817.187
7	2	0	13	4	696	74	[604,1,880,177]	662.013	216.536	240.229	456.765	444.529	578.318	1022.85
7	2	0	13	5	716	152	[661,133,750,214]	791.133	230.23	256.206	486.436	543.675	790.159	1333.83
7	2	0	13	6	811	99	[690,63,881,212]	590.14	216.035	247.71	463.745	500.472	711.187	1211.66
7	2	0	13	7	633	187	[578,120,678,226]	625.374	233.016	250.495	483.511	490.831	621.021	1111.85
7	2	0	13	8	675	214	[663,207,683,227]	674.881	249.33	251.182	500.512	644.361	656.126	1300.49
7	2	0	13	9	654	235	[628,217,671,248]	712.589	241.418	259.217	500.635	545.062	658.022	1203.08
7	2	0	13	10	847	167	[657,92,917,261]	745.781	219.919	255.813	475.732	623.813	1401.41	2025.22
7	2	0	13	11	114	234	[63,211,160,281]	705.092	199.905	213.961	413.866	400.266	444.355	844.621
7	2	0	13	12	700	261	[662,240,736,284]	661.983	239.357	249.972	489.329	912.791	1452.76	2365.55
7	2	0	13	13	211	286	[81,95,307,436]	704.476	213.087	237.403	450.49	439.585	457.637	897.222
7	2	0	13	14	961	280	[898,247,1026,324]	1922.91	203.545	220.177	423.722	3127.45	13951.5	17079
7	2	0	13	15	892	297	[887,293,903,302]	2238.83	213.532	213.527	427.059	11101.2	11161.9	22263.1
7	2	0	13	16	872	282	[816,242,927,320]	3944.19	225.98	242.461	468.441	8233.17	30919.1	39152.3
7	2	0	13	17	894	320	[886,311,900,326]	2166.02	224.671	226.327	450.998	7590.69	9275.16	16865.8
7	2	0	13	18	1010	320	[993,303,1035,350]	2433.65	200.909	238.901	439.81	1144.5	3698.98	4843.48
7	2	0	13	19	936	332	[896,313,956,361]	1153.91	210.197	212.893	423.09	3577.53	3990.68	7568.21
7	2	0	13	20	873	324	[859,315,887,344]	962.722	225.715	227.594	453.309	3936.5	4588.7	8525.2
7	2	0	13	21	973	325	[936,289,1012,369]	575.929	204.184	223.04	427.224	2339.17	6073.06	8412.23
7	2	0	13	22	52	354	[26,313,78,400]	648.252	192.1	213.739	405.839	386.919	398.369	785.288
7	2	0	13	23	889	333	[881,326,901,341]	1095.09	214.655	214.955	429.61	5692.23	6202.21	11894.4
7	2	0	13	24	786	345	[770,335,796,360]	1193.4	251.702	276.095	527.797	13340.3	24496.9	37837.2
7	2	0	13	25	842	336	[811,297,869,369]	666.125	238.258	264	502.258	7249.21	16828.8	24078
7	2	0	13	26	864	355	[854,341,874,365]	699.032	232.649	236.957	469.606	8494.19	9377.71	17871.9
7	2	0	13	27	882	346	[872,340,898,354]	606.059	218.748	219.339	438.087	4501.43	4198.25	8699.68
7	2	0	13	28	905	364	[874,342,928,391]	1449.44	221.13	245.042	466.172	9180.69	28320.1	37500.8
7	2	0	13	29	745	358	[728,331,776,392]	6893.2	294.979	382.22	677.199	33659.8	58651.6	92311.4
7	2	0	13	30	815	298	[780,274,850,377]	688.946	232	240.279	472.279	4821.07	5295.41	10116.5
7	2	0	13	31	947	400	[860,334,1024,474]	547.575	208.48	229.547	438.027	3775.05	17531.8	21306.8
7	2	0	13	32	778	372	[769,358,787,383]	804.37	244.569	248.099	492.668	14456.3	20684.6	35140.9
7	2	0	13	33	843	399	[800,364,872,429]	1628.21	239.055	251.464	490.519	14897.2	21415.3	36312.5
7	2	0	13	34	821	371	[809,348,842,390]	4180.75	280.61	379.743	660.353	23865.9	43708.9	67574.8
7	2	0	13	35	808	381	[800,368,816,393]	1625.19	240.672	242.416	483.088	3824.9	5085.41	8910.31
7	2	0	13	36	791	393	[777,374,803,406]	1521.58	243.406	249.774	493.18	8076.05	5175.23	13251.3
7	2	0	13	37	592	295	[464,193,883,412]	3927.88	242.045	256.297	498.342	2154.57	21741.2	23895.8
7	2	0	13	38	796	431	[764,398,833,482]	4860.65	252.465	325.014	577.479	20105	55273.4	75378.4
7	2	0	13	39	710	424	[657,390,747,466]	4718.86	252.253	270.916	523.169	11566.8	31873.9	43440.7
7	2	0	13	40	756	433	[731,408,777,465]	8620.09	261.543	299.557	561.1	23768	47917.1	71685.1
7	2	0	13	41	899	439	[840,406,958,479]	3385.82	217.579	241.237	458.816	2637.28	17147	19784.3
7	2	0	13	42	843	441	[834,426,856,460]	2032.64	227.707	224.589	452.296	5730.07	5477.94	11208
7	2	0	13	43	830	449	[817,430,852,471]	758	226.833	232.382	459.215	2958.24	4712.75	7670.99
7	2	0	13	44	498	489	[335,333,671,631]	541.745	246.513	261.039	507.552	1003.15	565.99	1569.14
7	2	0	13	45	861	480	[730,449,977,518]	1807.32	222.442	247.923	470.365	812.011	8161.44	8973.45
7	2	0	13	46	690	536	[602,455,947,620]	733.966	236.397	260.128	496.525	534.245	624.872	1159.12
7	2	0	13	47	56	658	[8,586,143,691]	603.433	199.899	219.546	419.445	597.295	525.936	1123.23
7	2	0	13	48	268	646	[64,518,483,815]	581.816	230.616	246.835	477.451	769.294	689.447	1458.74
7	2	0	13	49	746	764	[712,667,781,797]	8175.82	385.375	561.61	946.985	15189.6	26941.8	42131.4
7	2	0	13	50	803	862	[728,766,916,1009]	539.411	240.59	300.653	541.243	1832.83	10953.9	12786.7
7	2	0	13	51	262	921	[73,767,460,1078]	2735.71	254.479	250.286	504.765	477.928	2296.04	2773.97
7	2	0	13	52	503	832	[379,672,618,1078]	601.005	238.004	259.896	497.9	616.625	585.351	1201.98
7	2	0	13	53	537	43	[495,9,562,64]	15368.6	523.237	608.749	1131.99	3059.18	4467.32	7526.5
7	2	0	4	1	317	82	[139,1,530,163]	273.868	206.881	210.992	417.873	393	416.349	809.349
7	2	0	4	2	195	146	[124,102,218,169]	245.925	192.451	206.085	398.536	375.753	385.462	761.215
7	2	0	4	3	1003	193	[963,175,1021,225]	278.724	186.98	192.463	379.443	354.474	369.597	724.071
7	2	0	4	4	914	357	[886,332,955,393]	251.344	210.725	217.992	428.717	429.671	426.508	856.179
7	2	0	4	5	980	359	[921,310,1034,418]	330.061	197.272	207.561	404.833	394.571	421.449	816.02
7	2	0	4	6	835	243	[620,52,1043,491]	461.106	215.151	228.293	443.444	460.24	458.35	918.59
7	2	0	4	7	294	335	[84,177,526,504]	368.333	219.938	234.363	454.301	475.684	647.892	1123.58
7	2	0	4	8	164	448	[30,389,253,525]	415.542	198.515	223.729	422.244	431.473	484.856	916.329
7	2	0	4	9	179	487	[142,464,212,511]	557.598	207.366	217.863	425.229	457.966	473.598	931.564
7	2	0	4	10	368	558	[243,425,543,658]	856.45	234.067	241.372	475.439	496.234	533.103	1029.34
7	2	0	4	11	245	508	[231,495,256,517]	437.578	222.985	228.191	451.176	502.773	523.734	1026.51
7	2	0	4	12	235	525	[218,514,274,538]	452.55	224.115	231.677	455.792	483.88	494.138	978.018
7	2	0	4	13	135	645	[61,527,306,707]	650.86	209.521	237.413	446.934	474.405	527.028	1001.43
7	2	0	4	14	23	549	[1,508,51,574]	259	186.713	193.757	380.47	394.551	393.043	787.594
7	2	0	4	15	246	545	[237,532,258,569]	468.881	222.911	227.115	450.026	470.358	477.071	947.429
7	2	0	4	16	266	551	[253,536,279,573]	447.333	223.786	231.256	455.042	483.214	496.768	979.982
7	2	0	4	17	203	543	[109,495,238,589]	348.11	208.032	222.132	430.164	459.039	454.516	913.555
7	2	0	4	18	95	546	[30,509,180,601]	430.989	198.984	235.477	434.461	681.063	2257.33	2938.39
7	2	0	4	19	226	583	[156,553,259,619]	386.73	214.364	225.321	439.685	477.46	489.302	966.762
7	2	0	4	20	1016	613	[985,591,1037,639]	213.198	189.574	189.956	379.53	375.588	385.352	760.94
7	2	0	4	21	6	661	[1,654,12,671]	278.432	189.583	190.216	379.799	392.05	401.011	793.061
7	2	0	4	22	17	689	[1,666,42,718]	303.954	188.453	193.207	381.66	392.215	402.448	794.663
7	2	0	4	23	75	793	[7,748,153,852]	349.363	194.867	206.857	401.724	416.093	475.385	891.478
7	2	0	4	24	949	886	[925,860,977,921]	322.379	194.334	204.25	398.584	387.13	404.534	791.664
7	2	0	4	25	31	900	[1,845,46,937]	380.937	186.808	195.337	382.145	357.252	367.674	724.926
7	2	0	4	26	1059	922	[1049,909,1069,933]	193.971	176.532	176.532	353.064	920.079	920.079	1840.16
7	2	0	4	27	377	853	[184,706,547,986]	343.808	230.487	241.942	472.429	481.939	474.325	956.264
7	2	0	4	28	852	955	[820,920,995,1036]	343.369	198.049	222.748	420.797	375.504	457.563	833.067
7	2	0	4	29	505	985	[437,955,526,1010]	272.287	230.232	238.907	469.139	443.794	453.963	897.757
7	2	0	4	30	267	1019	[154,947,558,1078]	293.467	216.402	245.778	462.18	421.094	450.5	871.594
7	2	0	4	31	1044	1008	[1034,1004,1052,1014]	269.264	173.047	173.047	346.094	346.047	346.047	692.094
7	2	0	4	32	462	1030	[441,1007,484,1063]	236.868	222.515	221.604	444.119	417.099	422.132	839.231
7	2	0	4	33	372	1051	[330,1020,447,1078]	335.234	218.15	231.252	449.402	429.935	432.147	862.082
7	2	0	4	34	582	1052	[547,1018,629,1078]	352.271	219.953	228.103	448.056	403.546	419.944	823.49
7	2	0	4	35	443	1061	[419,1040,486,1078]	468.319	218.09	224.532	442.622	411.028	438.598	849.626
7	2	0	4	36	97	1057	[75,1045,115,1071]	247.366	184.041	188.008	372.049	330.739	350.301	681.04
7	2	0	4	37	405	1072	[395,1067,429,1078]	433.377	217.894	222.736	440.63	426.942	415.557	842.499
7	2	0	4	38	677	874	[431,598,872,1078]	375.277	234.131	242.547	476.678	472.691	580.05	1052.74
7	2	0	4	39	910	574	[860,543,984,623]	229.742	209.376	213.02	422.396	466.876	443.975	910.851
7	2	0	5	1	975	261	[941,229,1030,293]	382.89	192.494	207.394	399.888	360.787	401.917	762.704
7	2	0	5	2	931	274	[915,249,956,299]	237.129	198.532	201.603	400.135	382.459	380.276	762.735
7	2	0	5	3	720	287	[700,271,744,303]	226.603	230.376	230.18	460.556	500.093	536.243	1036.34
7	2	0	5	4	706	304	[675,283,741,331]	223.426	235.67	234.105	469.775	558.682	556.467	1115.15
7	2	0	5	5	893	300	[695,213,989,349]	227.373	211.876	235.287	447.163	427.087	591.438	1018.52
7	2	0	5	6	854	427	[628,331,1004,495]	223.519	222.321	237.499	459.82	448.369	566.209	1014.58
7	2	0	5	7	141	571	[63,535,177,607]	417.504	197.332	211.778	409.11	423.264	466.983	890.247
7	2	0	5	8	126	596	[111,583,150,611]	395.736	199.993	211.462	411.455	422.669	438.473	861.142
7	2	0	5	9	927	665	[901,642,944,683]	282.119	205.774	208.103	413.877	482.467	739.008	1221.47
7	2	0	5	10	972	699	[925,662,1031,735]	220.208	196.62	203.039	399.659	411.415	633.312	1044.73
7	2	0	5	11	191	774	[178,762,203,797]	348.373	211.756	216.497	428.253	460.028	467.843	927.871
7	2	0	5	12	60	781	[20,761,90,805]	365.474	193.957	199.917	393.874	379.6	399.083	778.683
7	2	0	5	13	131	792	[30,712,197,854]	466.967	202.201	231.041	433.242	422.868	489.82	912.688
7	2	0	5	14	970	954	[933,911,1006,1008]	274.582	189.662	193.027	382.689	340.876	348.609	689.485
7	2	0	5	15	490	960	[129,861,693,1078]	366.66	226.694	242.03	468.724	460.323	502.85	963.173
7	2	0	5	16	285	1021	[179,958,380,1078]	257.667	209.935	224.542	434.477	564.792	1092.4	1657.19
7	2	0	5	17	193	1023	[173,1006,219,1048]	274.798	198.144	201.194	399.338	412.223	425.508	837.731
7	2	0	5	18	56	593	[18,556,72,607]	218.385	188.906	187.949	376.855	392.792	396.838	789.63
7	2	0	5	19	384	987	[344,954,422,1078]	241.674	220.99	228.901	449.891	595.476	514.39	1109.87
7	2	0	5	20	716	115	[585,1,920,316]	222.362	217.831	233.797	451.628	440.239	496.086	936.325
7	2	0	5	21	476	136	[352,1,631,305]	233.225	225.051	237.438	462.489	436.331	477.293	913.624
7	2	0	5	22	782	254	[725,160,957,319]	261.614	216.301	232.342	448.643	435.132	510.022	945.154
7	2	0	5	23	635	310	[573,273,679,347]	227.507	240.488	240.215	480.703	513.19	539.575	1052.77
7	2	0	5	24	793	361	[686,329,1005,388]	222.499	218.167	236.466	454.633	442.531	582.664	1025.19
7	2	0	5	25	350	279	[160,157,581,422]	230.623	227.557	239.6	467.157	459.048	486.344	945.392
7	2	0	5	26	314	413	[230,372,533,468]	235.596	233.135	242.418	475.553	476.294	485.877	962.171
7	2	0	5	27	616	401	[528,297,672,483]	231.701	244.248	248.875	493.123	514.832	503.692	1018.52
7	2	0	5	28	206	435	[115,378,437,506]	232.445	218.751	238.956	457.707	470.763	491.746	962.509
7	2	0	5	29	477	497	[191,440,536,561]	245.863	231.099	243.231	474.33	544.541	537.945	1082.49
7	2	0	5	30	684	454	[616,405,796,501]	254.008	240.712	246.241	486.953	485.65	503.813	989.463
7	2	0	5	31	764	627	[595,440,882,713]	238.838	236.047	244.776	480.823	501.371	503.097	1004.47
7	2	0	5	32	575	527	[447,460,632,585]	226.546	243.668	245.952	489.62	497.727	495.587	993.314
7	2	0	5	33	885	533	[724,460,1020,606]	243.143	215.848	230.328	446.176	449.398	453.862	903.26
7	2	0	5	34	587	743	[274,554,779,908]	233.165	240.378	242.381	482.759	493.483	496.257	989.74
7	2	0	5	35	441	603	[288,535,509,693]	225.54	235.352	241.76	477.112	493.417	494.432	987.849
7	2	0	5	36	226	602	[64,534,388,679]	220.696	218.626	233.192	451.818	491.999	487.734	979.733
7	2	0	5	37	638	1037	[488,997,821,1078]	250.457	216.696	225.472	442.168	401.13	448.429	849.559
7	2	0	16	1	50	79	[1,1,93,140]	323.698	191.643	199.115	390.758	307.299	351.156	658.455
7	2	0	16	2	387	130	[204,1,580,292]	355.303	215.788	234.352	450.14	464.956	481.82	946.776
7	2	0	16	3	501	233	[419,1,641,293]	380.454	227.763	246.526	474.289	468.546	504.536	973.082
7	2	0	16	4	688	94	[566,1,830,217]	341.057	219.175	233.861	453.036	412.358	452.328	864.686
7	2	0	16	5	598	220	[577,211,624,229]	430.642	234.766	235.217	469.983	469.039	488.755	957.794
7	2	0	16	6	580	253	[516,145,776,306]	414.581	238.191	243.719	481.91	487.3	512.052	999.352
7	2	0	16	7	173	255	[83,80,262,375]	426.46	200.873	198.474	399.347	436.546	402.599	839.145
7	2	0	16	8	772	244	[608,126,944,375]	413.043	221.724	251.183	472.907	430.12	512.602	942.722
7	2	0	16	9	709	418	[544,275,859,527]	598.275	239.855	254.593	494.448	477.282	513.44	990.722
7	2	0	16	10	429	358	[285,275,662,488]	356.864	242.882	255.17	498.052	503.438	521.386	1024.82
7	2	0	16	11	251	435	[87,286,383,641]	394.582	220.979	237.255	458.234	680.603	546.071	1226.67
7	2	0	16	12	531	604	[377,439,701,805]	409.33	244.704	257.396	502.1	642.615	524.297	1166.91
7	2	0	16	13	56	520	[1,433,100,697]	480.728	191.492	200.264	391.756	393.082	408.552	801.634
7	2	0	16	14	240	735	[43,501,432,937]	393.473	218.556	222.785	441.341	768.281	486.247	1254.53
7	2	0	16	15	817	723	[634,399,1028,941]	361.182	221.542	224.847	446.389	469.002	528.8	997.802
7	2	0	16	16	1023	1039	[1008,982,1039,1069]	7787.35	438.193	572.14	1010.33	18055.9	17668.3	35724.2
7	2	0	19	1	850	132	[667,1,1078,263]	206.43	200.252	200.438	400.69	497.089	332.95	830.039
7	2	0	19	2	207	207	[1,1,511,413]	629.048	202.811	219.038	421.849	418.147	405.762	823.909
7	2	0	19	3	953	255	[855,159,1078,326]	183.31	193.351	184.29	377.641	371.7	364.88	736.58
7	2	0	19	4	1020	344	[925,273,1078,454]	241.5	186.37	189.489	375.859	377.63	921.543	1299.17
7	2	0	19	5	886	541	[652,253,1078,770]	399.462	214.827	224.152	438.979	433.026	439.966	872.992
7	2	0	19	6	236	647	[37,413,427,973]	286.669	217.812	209.277	427.089	476.557	448.56	925.117
7	2	0	19	7	38	673	[1,434,78,729]	417.386	187.623	192.734	380.357	456.498	492.31	948.808
7	2	0	19	8	10	737	[1,729,24,747]	372.528	190.977	193.528	384.505	458.378	465.613	923.991
7	2	0	19	9	83	907	[1,690,166,1058]	411.004	193.021	199.859	392.88	416.039	476.541	892.58
7	2	0	19	10	8	768	[1,743,16,802]	338.768	186.6	190.03	376.63	410.52	419.525	830.045
7	2	0	6	1	879	32	[736,1,969,69]	620.754	193.696	191.942	385.638	339.172	335.025	674.197
7	2	0	6	2	779	137	[648,11,1015,263]	611.013	207.106	203.468	410.574	391.98	372.539	764.519
7	2	0	6	3	76	363	[26,184,128,478]	802.523	191.153	194.138	385.291	441.917	1434.86	1876.78
7	2	0	6	4	412	350	[144,59,606,585]	498.647	226.313	240.547	466.86	490.013	506.101	996.114
7	2	0	6	5	221	545	[57,231,382,720]	564.209	214.261	236.682	450.943	462.311	484.309	946.62
7	2	0	6	6	838	348	[727,254,963,485]	12614.3	224.003	340.039	564.042	2370.46	64602.4	66972.9
7	2	0	6	7	819	547	[632,378,969,689]	10216.3	229.995	342.968	572.963	2069.02	65252.5	67321.5
7	2	0	6	8	747	859	[515,654,1003,1078]	566.125	223.458	231.068	454.526	419.957	457.364	877.321
7	2	0	23	1	410	165	[323,1,510,312]	214.872	223.437	209.512	432.949	429.081	378.888	807.969
7	2	0	23	2	267	64	[150,1,334,187]	216.932	203.471	191.5	394.971	371.138	336.636	707.774
7	2	0	23	3	639	110	[481,1,848,294]	416.303	221.271	216.523	437.794	425.946	397.798	823.744
7	2	0	23	4	190	195	[3,8,343,416]	210.311	199.047	194.356	393.403	400.003	357.544	757.547
7	2	0	23	5	917	492	[744,197,1078,687]	280.832	204.896	188.737	393.633	394.658	348.905	743.563
7	2	0	23	6	893	856	[683,674,1075,1078]	226.488	206.972	191.219	398.191	487.149	339.269	826.418
7	2	0	23	7	156	954	[1,750,382,1078]	190.914	199.601	179.767	379.368	399.488	310.353	709.841
7	2	0	10	1	1043	9	[1038,1,1052,17]	280.053	170.414	170.414	340.828	282.474	282.474	564.948
7	2	0	10	2	1034	21	[1014,15,1043,29]	331.463	180.532	180.111	360.643	298.16	298.764	596.924
7	2	0	10	3	743	42	[694,1,858,84]	232.551	205.438	217.276	422.714	378.082	401.133	779.215
7	2	0	10	4	126	154	[94,129,146,182]	281.626	189.99	196.981	386.971	361.878	391.916	753.794
7	2	0	10	5	5	156	[1,151,13,162]	398.444	180.522	180.522	361.044	326.5	326.5	653
7	2	0	10	6	177	127	[112,50,245,182]	589.383	197.567	222.103	419.67	388.03	419.234	807.264
7	2	0	10	7	929	166	[868,113,1005,213]	356.63	195.781	209.454	405.235	388.943	414.849	803.792
7	2	0	10	8	247	186	[124,142,275,219]	562.679	206.515	219.633	426.148	423.287	471.725	895.012
7	2	0	10	9	56	209	[39,181,75,234]	300.458	184.107	183.365	367.472	344.914	350.927	695.841
7	2	0	10	10	179	304	[64,251,249,367]	536.393	205.98	232.23	438.21	418.613	484.336	902.949
7	2	0	10	11	72	344	[29,324,93,366]	375.131	190.364	193.443	383.807	444.891	534.197	979.088
7	2	0	10	12	173	415	[66,348,302,510]	550.099	213.829	238.121	451.95	454.74	507.824	962.564
7	2	0	10	13	79	452	[26,421,116,488]	412.678	195.016	208.6	403.616	411.385	404.3	815.685
7	2	0	10	14	941	416	[799,333,1031,489]	321.382	209.681	240.391	450.072	426.706	500.418	927.124
7	2	0	10	15	23	496	[5,484,43,523]	431.984	187.401	194.381	381.782	417.288	425.508	842.796
7	2	0	10	16	50	540	[19,508,71,559]	647.51	192.307	214.021	406.328	440.187	462.156	902.343
7	2	0	10	17	1052	536	[1042,527,1071,559]	315.597	187.673	193.121	380.794	401.034	414.734	815.768
7	2	0	10	18	1031	561	[1010,539,1053,586]	214.34	191.94	192.479	384.419	420.006	401.84	821.846
7	2	0	10	19	108	585	[87,563,132,637]	429.454	201.237	213.354	414.591	494.654	522.098	1016.75
7	2	0	10	20	66	592	[1,558,97,666]	468.005	194.341	210.324	404.665	462.59	498.08	960.67
7	2	0	10	21	77	664	[19,577,161,711]	380.697	199.947	214.212	414.159	470.613	501.654	972.267
7	2	0	10	22	808	608	[628,537,935,678]	690.4	231.225	261.933	493.158	475.846	555.967	1031.81
7	2	0	10	23	658	699	[595,662,698,795]	408.633	247.562	253.34	500.902	522.916	531.44	1054.36
7	2	0	10	24	716	696	[678,649,748,728]	396.604	243.472	252.247	495.719	503.874	516.357	1020.23
7	2	0	10	25	858	716	[732,601,1020,792]	405.226	221.303	253.571	474.874	457.324	555.308	1012.63
7	2	0	10	26	960	690	[913,660,1039,749]	357.573	203.706	218.064	421.77	427.855	448.645	876.5
7	2	0	10	27	972	740	[953,715,1015,770]	310.957	200.011	206.009	406.02	391.765	397.362	789.127
7	2	0	10	28	1040	745	[1004,726,1056,760]	364.198	189.986	200.483	390.469	356.839	383.56	740.399
7	2	0	10	29	917	828	[844,769,1019,886]	445.729	207.262	241.677	448.939	441.481	471.896	913.377
7	2	0	10	30	1068	816	[1054,804,1078,834]	649.26	187.189	188.87	376.059	360.793	368.618	729.411
7	2	0	10	31	1045	831	[1040,827,1059,836]	257.864	182.568	182.568	365.136	364.695	364.695	729.39
7	2	0	10	32	976	880	[963,869,1011,911]	244.315	193.792	199.472	393.264	396.558	408.62	805.178
7	2	0	10	33	953	896	[927,869,979,921]	336	198.859	203.432	402.291	408.204	416.8	825.004
7	2	0	10	34	918	916	[904,885,939,926]	314.107	224.052	277.145	501.197	444.205	465.811	910.016
7	2	0	10	35	903	938	[881,907,926,964]	456.935	234.261	347.258	581.519	410.934	456.653	867.587
7	2	0	10	36	112	949	[18,892,164,1026]	448.855	199.012	220.043	419.055	439.423	473.462	912.885
7	2	0	10	37	120	1027	[73,906,199,1075]	530.307	202.597	230.773	433.37	456.914	495.08	951.994
7	2	0	10	38	1023	945	[1018,940,1029,951]	257.052	177.896	177.896	355.792	364.917	364.917	729.834
7	2	0	10	39	959	944	[923,907,995,986]	358.981	205.674	301.243	506.917	382.121	448.919	831.04
7	2	0	10	40	326	955	[287,909,360,1043]	480.523	227.395	246.15	473.545	553.868	650.084	1203.95
7	2	0	10	41	915	966	[886,946,984,1008]	398.123	208.248	309.29	517.538	378.124	453.961	832.085
7	2	0	10	42	791	970	[693,930,859,1013]	411.959	223.081	238.541	461.622	413.014	449.473	862.487
7	2	0	10	43	229	1012	[133,927,312,1078]	328.104	212.56	233.073	445.633	477.759	591.052	1068.81
7	2	0	10	44	499	1012	[457,985,557,1061]	373	231.652	239.957	471.609	501.379	464.322	965.701
7	2	0	10	45	900	1007	[864,985,960,1048]	372.128	197.873	213.466	411.339	369.182	386.308	755.49
7	2	0	10	46	576	1002	[540,969,627,1078]	331.171	230.769	230.88	461.649	429.167	434.772	863.939
7	2	0	10	47	852	1005	[820,976,871,1038]	536.131	209.821	222.071	431.892	380.834	423.273	804.107
7	2	0	10	48	777	1045	[746,1001,806,1078]	356.906	216.264	235.273	451.537	382.868	406.273	789.141
7	2	0	10	49	527	1044	[490,1019,547,1078]	301.645	233.105	241.561	474.666	479.982	532.047	1012.03
7	2	0	10	50	837	1032	[825,1022,851,1048]	478.221	212.829	218.506	431.335	387.029	399.424	786.453
7	2	0	10	51	647	1042	[596,1000,696,1078]	584.373	225.67	245.735	471.405	405.599	444.51	850.109
7	2	0	10	52	423	1038	[318,995,504,1078]	521.98	224.12	237.898	462.018	499.961	551.357	1051.32
7	2	0	10	53	910	1053	[881,1024,944,1078]	305.748	192.159	201.042	393.201	357.438	381.983	739.421
7	2	0	10	54	723	1054	[667,1027,765,1078]	381.839	216.571	233.556	450.127	392.942	412.435	805.377
7	2	0	10	55	821	1061	[791,998,843,1078]	412.608	210.633	219.377	430.01	381.818	434.069	815.887
7	2	0	10	56	873	1046	[855,1028,892,1078]	383.355	204.417	208.605	413.022	374.381	382.84	757.221
7	2	0	10	57	852	1052	[836,1034,868,1078]	352.509	204.027	212.653	416.68	374.165	406.554	780.719
7	2	0	10	58	539	1066	[510,1045,557,1078]	439.813	228.318	247.132	475.45	422.373	455.725	878.098
7	2	0	10	59	882	1070	[874,1062,893,1078]	273.073	195.496	199.257	394.753	349.919	360.468	710.387
7	2	0	10	60	572	370	[277,153,861,592]	247.203	246.907	250.479	497.386	514.608	505.758	1020.37
7	2	0	10	61	206	847	[98,758,454,1078]	367.785	227.472	249.21	476.682	527.807	564.726	1092.53
7	2	0	10	62	555	878	[278,728,757,1051]	541.754	240.967	262.892	503.859	527.895	582.48	1110.38
7	2	0	10	63	888	513	[645,455,1008,591]	308.268	225.291	245.918	471.209	488.797	550.606	1039.4
7	2	0	10	64	222	545	[67,474,346,607]	288.351	219.046	235.121	454.167	516.579	546.489	1063.07
7	2	0	10	65	616	586	[565,533,724,664]	620.711	245.706	268.492	514.198	535.767	563.317	1099.08
7	2	0	10	66	658	593	[643,566,681,611]	291.968	243.259	248.2	491.459	560.171	524.632	1084.8
7	2	0	10	67	526	676	[283,566,639,788]	439.77	244.548	262.796	507.344	557.49	584.854	1142.34
7	2	0	10	68	736	816	[612,709,916,965]	487.003	235.53	254.975	490.505	486.163	567.818	1053.98
7	2	0	1	1	121	14	[105,5,135,31]	578.316	193.55	194.158	387.708	443.613	454.577	898.19
7	2	0	1	2	21	49	[16,44,29,57]	491.179	182.927	182.927	365.854	407.13	407.13	814.26
7	2	0	1	3	931	80	[904,36,962,102]	541.849	195.939	205.164	401.103	607.575	833.582	1441.16
7	2	0	1	4	213	155	[162,105,255,201]	6788.93	229.957	295.143	525.1	19713.4	56897.5	76610.9
7	2	0	1	5	846	117	[774,74,902,204]	8438.03	220.289	320.107	540.396	4106.62	52340.4	56447
7	2	0	1	6	821	195	[812,182,834,217]	11514.5	1131.62	1025.8	2157.42	65164.6	65535	130700
7	2	0	1	7	20	188	[1,159,70,214]	13107.1	499.008	522.924	1021.93	19447.5	17482.8	36930.3
7	2	0	1	8	809	212	[797,196,823,227]	18939.2	1935.04	2575.7	4510.74	64939.9	65535	130475
7	2	0	1	9	76	211	[62,200,100,226]	11634.7	612.163	858.611	1470.77	57861	62065.5	119926
7	2	0	1	10	115	228	[99,208,134,248]	7613.08	708.159	1031.83	1739.99	54925.9	65421.5	120347
7	2	0	1	11	65	231	[54,219,81,246]	10605.2	359.963	434.578	794.541	19045.1	28159.4	47204.5
7	2	0	1	12	91	235	[71,225,107,257]	13606.1	620.975	779.435	1400.41	27355.2	30482.6	57837.8
7	2	0	1	13	835	232	[814,215,857,255]	17565.1	1632.88	1940.55	3573.43	64536	65534.1	130070
7	2	0	1	14	800	238	[776,214,814,260]	10347.9	1086.56	1501.06	2587.62	63705.4	62827.3	126533
7	2	0	1	15	143	237	[115,224,186,262]	2036.93	277.826	425.064	702.89	10769.4	26564.3	37333.7
7	2	0	1	16	808	261	[791,239,829,271]	6848.07	463.705	729.861	1193.57	54172.1	65517.6	119690
7	2	0	1	17	340	137	[216,6,471,482]	9495.17	230.23	418.717	648.947	816.176	24643	25459.2
7	2	0	1	18	854	255	[843,242,863,266]	1741.08	565.079	540.654	1105.73	62088.9	60888.4	122977
7	2	0	1	19	299	237	[235,182,345,312]	8242.85	260.052	399.171	659.223	14482.6	54951.1	69433.7
7	2	0	1	20	826	270	[817,250,841,290]	4108.02	277.861	360.513	638.374	26458.4	56967.5	83425.9
7	2	0	1	21	245	265	[196,221,281,324]	15303	287.889	463.715	751.604	23064.5	60416.7	83481.2
7	2	0	1	22	189	264	[131,243,221,293]	14145.1	231.852	381.774	613.626	9700.37	60987.4	70687.8
7	2	0	1	23	357	263	[336,252,374,277]	2537.77	486.882	793.886	1280.77	35575.5	40021.2	75596.7
7	2	0	1	24	775	276	[755,263,806,291]	578.256	239.757	259.14	498.897	5288.81	12792.9	18081.7
7	2	0	1	25	856	285	[833,277,864,293]	917.902	237.8	253.159	490.959	16308.9	29099.7	45408.6
7	2	0	1	26	266	303	[231,264,297,335]	1718.17	242.177	264.496	506.673	11963.9	18605.2	30569.1
7	2	0	1	27	873	271	[844,254,895,301]	1300.93	237.698	239.339	477.037	21217.1	30385.8	51602.9
7	2	0	1	28	904	267	[889,253,929,314]	1553.76	228.577	252.707	481.284	18163.2	43455.7	61618.9
7	2	0	1	29	894	296	[869,278,906,310]	1218.39	251.356	270.858	522.214	27696.2	35965.5	63661.7
7	2	0	1	30	591	239	[389,75,779,496]	1552.47	269.21	321.629	590.839	676.673	15483.8	16160.5
7	2	0	1	31	860	299	[853,291,869,317]	1230.41	221.339	220.067	441.406	9044.68	10011.3	19056
7	2	0	1	32	952	273	[919,222,1006,329]	3513.69	208.218	261.633	469.851	4868.89	31832.9	36701.8
7	2	0	1	33	844	298	[826,287,862,317]	677.576	225.137	229.639	454.776	3955.15	6682.65	10637.8
7	2	0	1	34	882	317	[867,305,897,340]	1759.62	235.362	261	496.362	18359.3	41067.7	59427
7	2	0	1	35	821	319	[778,287,873,344]	1687.44	232.117	259.803	491.92	6132.65	29308.1	35440.8
7	2	0	1	36	902	327	[887,305,912,339]	884.081	222.932	221.394	444.326	7884.48	11140.4	19024.9
7	2	0	1	37	915	320	[907,307,924,341]	1319.28	223.532	241.117	464.649	10286.4	21462.7	31749.1
7	2	0	1	38	975	329	[957,313,993,374]	580.956	259.485	457.094	716.579	792.344	1412.99	2205.33
7	2	0	1	39	945	336	[916,284,992,384]	1439.17	234.477	299.562	534.039	4233.26	12446.3	16679.6
7	2	0	1	40	664	344	[645,333,693,360]	545.33	248.447	255.702	504.149	533.348	552.968	1086.32
7	2	0	1	41	807	361	[751,288,851,398]	882.535	231.351	237.931	469.282	3027.77	6399.28	9427.05
7	2	0	1	42	916	365	[890,336,951,407]	902.991	217.037	226.184	443.221	3839.94	14371.5	18211.4
7	2	0	1	43	735	392	[637,346,816,431]	619.594	238.563	260.514	499.077	544.17	594.028	1138.2
7	2	0	1	44	868	362	[833,334,900,416]	1843.79	223.07	243.786	466.856	3115.25	16273.5	19388.8
7	2	0	1	45	662	536	[510,363,894,690]	608.856	244.957	273.922	518.879	545.679	558.8	1104.48
7	2	0	1	46	188	373	[106,322,295,417]	658.722	216.663	238.643	455.306	1512.08	579.722	2091.8
7	2	0	1	47	839	415	[807,385,890,451]	2288.04	225.64	263.344	488.984	1181.23	11902.5	13083.7
7	2	0	1	48	1072	401	[1067,391,1078,412]	530.202	163.653	163.653	327.306	362.948	362.948	725.896
7	2	0	1	49	1065	416	[1060,410,1078,427]	532.915	180.085	180.085	360.17	421.38	421.38	842.76
7	2	0	1	50	904	431	[877,388,940,459]	5828.28	234.235	358.057	592.292	6598.39	44291.5	50889.9
7	2	0	1	51	119	426	[43,377,186,485]	680.736	203.372	235.769	439.141	487.88	527.455	1015.34
7	2	0	1	52	326	584	[71,469,478,699]	523.011	231.63	256.159	487.789	568.09	515.284	1083.37
7	2	0	1	53	237	933	[82,807,357,1037]	634.625	220.365	252.414	472.779	456.296	507.547	963.843
7	2	0	1	54	502	846	[101,676,666,1078]	614.802	234.901	250.852	485.753	481.508	514.58	996.088
7	2	0	3	1	551	144	[266,1,806,288]	223.68	218.467	215.408	433.875	417.637	404.272	821.909
7	2	0	3	2	261	169	[41,1,377,342]	348.072	202.158	210.505	412.663	408.176	427.225	835.401
7	2	0	3	3	392	381	[176,184,601,605]	232.884	233.473	225.511	458.984	466.907	597.658	1064.57
7	2	0	3	4	1047	397	[1042,393,1052,410]	234.802	174.323	174.323	348.646	329.635	329.635	659.27
7	2	0	3	5	856	430	[744,322,1058,542]	297	210.001	185.224	395.225	452.093	360.673	812.766
7	2	0	3	6	178	485	[27,334,352,631]	564.679	207.266	214.519	421.785	425.453	453.057	878.51
7	2	0	3	7	980	582	[842,538,1069,660]	206.028	198.606	178.103	376.709	408.378	350.953	759.331
7	2	0	3	8	78	608	[1,536,128,699]	453.922	190.412	200.211	390.623	389.35	412.3	801.65
7	2	0	3	9	895	712	[730,562,1049,840]	293.645	211.178	189.884	401.062	435.772	378.109	813.881
7	2	0	3	10	1062	912	[1056,908,1067,917]	292.844	177.056	177.056	354.112	321.722	321.722	643.444
7	2	0	3	11	1044	961	[1039,953,1054,968]	244.984	172.813	172.813	345.626	308.977	308.977	617.954
7	2	0	3	12	126	1000	[61,959,332,1078]	256.787	197.625	197.66	395.285	347.356	366.138	713.494
7	2	0	3	13	1036	990	[1031,984,1041,995]	351.204	184.272	184.272	368.544	323.369	323.369	646.738
7	2	0	3	14	1027	1029	[1015,1024,1034,1035]	227.465	174.039	174.039	348.078	301.814	301.814	603.628
7	2	0	3	15	742	916	[471,747,917,1078]	279.58	222.569	218.084	440.653	427.236	397.529	824.765
7	2	0	3	16	19	976	[1,955,31,985]	210.806	182.003	174.72	356.723	394.605	528.667	923.272
7	2	0	3	17	244	823	[1,585,473,1060]	247.192	235.375	290.198	525.573	461.628	430.802	892.43
7	2	0	8	1	663	9	[652,1,677,18]	296.194	203.74	205.022	408.762	384.37	393.538	777.908
7	2	0	8	2	390	27	[282,1,429,68]	466.194	202.595	222.839	425.434	473.673	471.024	944.697
7	2	0	8	3	627	36	[576,1,679,82]	406.834	212.591	222.735	435.326	401.028	438.735	839.763
7	2	0	8	4	524	52	[446,1,597,111]	437.381	215.612	242.667	458.279	414.378	447.314	861.692
7	2	0	8	5	635	82	[604,67,649,94]	420.032	223.586	226.578	450.164	421.801	440.248	862.049
7	2	0	8	6	587	77	[576,70,595,108]	329.413	223.787	223.489	447.276	426.09	429.565	855.655
7	2	0	8	7	659	80	[641,62,672,109]	239.897	219.484	222.147	441.631	410.033	414.5	824.533
7	2	0	8	8	348	71	[170,1,417,123]	480.134	203.18	231.173	434.353	435.52	485.685	921.205
7	2	0	8	9	632	101	[617,91,647,114]	359.188	227.325	232.406	459.731	428.593	449.828	878.421
7	2	0	8	10	599	107	[572,91,610,138]	319.068	228.381	234.512	462.893	441.49	462.66	904.15
7	2	0	8	11	634	120	[589,81,661,132]	331.749	226.758	228.769	455.527	429.715	447.04	876.755
7	2	0	8	12	550	128	[517,91,604,208]	319.47	229.347	233.188	462.535	449.193	452.709	901.902
7	2	0	8	13	606	126	[595,114,627,138]	555.965	235.305	243.035	478.34	469.404	493.553	962.957
7	2	0	8	14	637	138	[625,127,650,149]	451.403	231.009	234.396	465.405	463.351	482.931	946.282
7	2	0	8	15	661	153	[596,128,696,177]	532.078	230.641	242.821	473.462	487.635	616.886	1104.52
7	2	0	8	16	34	153	[23,139,44,163]	216.122	178.952	178.833	357.785	354.428	358.967	713.395
7	2	0	8	17	257	85	[114,26,375,170]	288.086	200.368	215.409	415.777	405.706	472.677	878.383
7	2	0	8	18	26	182	[1,164,48,209]	354.135	180.203	187.654	367.857	389.65	377.746	767.396
7	2	0	8	19	229	145	[87,76,337,220]	455.472	204.513	224.954	429.467	446.53	517.028	963.558
7	2	0	8	20	606	184	[574,155,630,206]	417.312	232.095	235.204	467.299	696.828	886.172	1583
7	2	0	8	21	653	190	[616,164,699,213]	513.608	231	240.759	471.759	460.131	492.78	952.911
7	2	0	8	22	243	201	[221,186,267,214]	354.52	212.042	213.5	425.542	491.94	477.48	969.42
7	2	0	8	23	771	165	[684,119,825,235]	493.626	220.317	239.907	460.224	445.489	466.523	912.012
7	2	0	8	24	926	194	[730,108,1039,306]	560.331	204.802	241.252	446.054	402.639	567.079	969.718
7	2	0	8	25	7	267	[1,246,22,282]	462.775	179.166	183.742	362.908	431.838	524.18	956.018
7	2	0	8	26	165	257	[41,209,206,304]	329.111	194.196	210.205	404.401	461.358	510.735	972.093
7	2	0	8	27	1051	292	[1041,271,1057,306]	194.418	177.162	173.041	350.203	425.134	493.98	919.114
7	2	0	8	28	231	512	[1,341,532,643]	496.381	217.814	242.181	459.995	506.423	566.962	1073.38
7	2	0	8	29	978	540	[902,475,1067,743]	229.247	194.576	207.079	401.655	387.621	397.551	785.172
7	2	0	8	30	23	549	[1,526,60,600]	282.901	188.02	194.105	382.125	627.486	1003.32	1630.81
7	2	0	8	31	91	549	[71,539,109,575]	392.436	197.092	204.4	401.492	534.11	625.764	1159.87
7	2	0	8	32	70	561	[53,526,95,582]	335.527	194.442	197.72	392.162	536.007	528.785	1064.79
7	2	0	8	33	1052	565	[1044,549,1067,586]	212.959	180.663	183.742	364.405	444.977	517.701	962.678
7	2	0	8	34	8	592	[1,576,17,601]	447.961	192.392	198.947	391.339	507.935	521.539	1029.47
7	2	0	8	35	93	588	[57,571,106,616]	536.972	195.513	203.493	399.006	543.65	566.729	1110.38
7	2	0	8	36	70	629	[40,584,96,658]	525.202	198.317	207.509	405.826	548.789	542.349	1091.14
7	2	0	8	37	21	604	[1,571,55,622]	501.438	190.165	194.087	384.252	499.872	507.328	1007.2
7	2	0	8	38	40	624	[26,615,51,636]	314.986	193.965	197.786	391.751	505.973	517.593	1023.57
7	2	0	8	39	18	636	[1,616,51,656]	619.091	195.561	206.174	401.735	502.255	529.676	1031.93
7	2	0	8	40	142	652	[77,601,206,701]	399.664	206.9	224.042	430.942	577.517	653.37	1230.89
7	2	0	8	41	39	651	[32,645,58,657]	365.305	195.99	198.39	394.38	545.947	541.797	1087.74
7	2	0	8	42	70	659	[62,652,78,672]	346.333	198.585	205.948	404.533	561.432	557.635	1119.07
7	2	0	8	43	42	670	[17,652,64,696]	550.461	197.398	213.414	410.812	527.725	583.197	1110.92
7	2	0	8	44	96	704	[55,665,131,752]	382.287	202.303	212.222	414.525	573.231	657.889	1231.12
7	2	0	8	45	289	710	[93,616,426,806]	230.867	224.478	228.388	452.866	652.61	998.908	1651.52
7	2	0	8	46	25	791	[1,760,59,818]	283.665	191.759	202.3	394.059	471.363	640.271	1111.63
7	2	0	8	47	1017	782	[974,734,1059,826]	254.342	186.229	191.75	377.979	356.437	363.817	720.254
7	2	0	8	48	245	926	[1,685,356,1078]	448.604	209.221	223.389	432.61	479.938	486.701	966.639
7	2	0	8	49	212	831	[200,821,224,847]	446.847	221.278	227.806	449.084	484.549	481.888	966.437
7	2	0	8	50	962	793	[938,749,1067,864]	293.075	193.018	198.285	391.303	373.271	373.675	746.946
7	2	0	8	51	1071	869	[1061,862,1078,885]	536.428	181.667	182.803	364.47	470.354	498.486	968.84
7	2	0	8	52	951	906	[869,796,1053,1044]	389.716	198.933	206.937	405.87	363.214	379.084	742.298
7	2	0	8	53	80	1012	[14,948,165,1044]	238.692	190.507	200.659	391.166	388.161	419.736	807.897
7	2	0	8	54	586	933	[292,785,816,1078]	500.772	231.434	239.865	471.299	437.054	469.608	906.662
7	2	0	8	55	870	1059	[840,1033,920,1078]	398.865	193.299	200.281	393.58	341.596	364.615	706.211
7	2	0	8	56	314	1038	[213,998,385,1078]	287.315	212.136	227.269	439.405	416.802	492.046	908.848
7	2	0	8	57	854	69	[649,1,943,166]	296.183	203.942	227.923	431.865	372.83	440.837	813.667
7	2	0	8	58	331	196	[290,156,382,236]	263.194	219.229	219.898	439.127	484.325	512.082	996.407
7	2	0	8	59	578	271	[503,197,692,396]	242.397	238.567	239.095	477.662	477.393	469.921	947.314
7	2	0	8	60	510	205	[426,1,557,264]	361.634	227.521	239.642	467.163	455.652	483.116	938.768
7	2	0	8	61	431	170	[362,1,538,420]	339.357	229.593	232.986	462.579	471.53	484.686	956.216
7	2	0	8	62	241	315	[36,119,340,404]	451.618	206.208	226.427	432.635	500.033	783.987	1284.02
7	2	0	8	63	380	373	[279,210,504,481]	279.367	233.353	232.015	465.368	492.236	503.583	995.819
7	2	0	8	64	724	440	[520,224,1024,635]	298.085	230.261	240.632	470.893	464.997	477.789	942.786
7	2	0	8	65	501	703	[342,554,680,907]	401.453	242.961	248.138	491.099	565.563	610.428	1175.99
7	2	0	15	1	12	17	[4,5,18,24]	211.224	170.937	170.937	341.874	875.112	875.112	1750.22
7	2	0	15	2	149	24	[131,5,168,38]	245.387	185.837	186.82	372.657	372.56	332.667	705.227
7	2	0	15	3	882	30	[835,3,950,61]	262.322	193.079	211.948	405.027	376.339	790.478	1166.82
7	2	0	15	4	106	55	[94,41,115,74]	309.356	190.32	204.811	395.131	684.64	476.533	1161.17
7	2	0	15	5	308	60	[193,1,373,122]	449.29	202.929	228.71	431.639	391.373	443.91	835.283
7	2	0	15	6	228	102	[145,58,265,144]	276.916	196.785	205.537	402.322	467.801	385.705	853.506
7	2	0	15	7	92	144	[86,137,110,154]	370.163	184.324	184.905	369.229	361.059	373.068	734.127
7	2	0	15	8	72	153	[60,143,93,167]	477.163	188.163	188.764	376.927	356.855	360.772	717.627
7	2	0	15	9	100	165	[87,153,131,182]	479.306	191.483	194.554	386.037	361.114	373.988	735.102
7	2	0	15	10	79	169	[72,159,89,177]	384.773	189.865	190.563	380.428	363.969	366.891	730.86
7	2	0	15	11	202	172	[119,102,259,228]	514.213	199.743	225.734	425.477	726.072	510.074	1236.15
7	2	0	15	12	113	180	[102,170,132,190]	579.675	194.969	202.219	397.188	383.02	411.497	794.517
7	2	0	15	13	90	188	[65,177,102,215]	356.108	188.906	190.379	379.285	359.653	367.278	726.931
7	2	0	15	14	107	199	[89,186,126,215]	369.094	192.628	199.748	392.376	373.237	396.512	769.749
7	2	0	15	15	483	152	[177,1,685,310]	358.626	224.65	247.515	472.165	509.874	566.303	1076.18
7	2	0	15	16	820	242	[693,85,960,417]	392.475	222.204	249.364	471.568	453.642	473.788	927.43
7	2	0	15	17	256	344	[111,256,590,442]	507.478	228.266	257.511	485.777	517.223	614.228	1131.45
7	2	0	15	18	389	511	[118,401,516,615]	302.865	231.946	243.885	475.831	499.593	505.438	1005.03
7	2	0	15	19	918	393	[709,287,1027,497]	270.908	216.304	240.959	457.263	414.424	489	903.424
7	2	0	15	20	624	427	[439,243,975,644]	325.903	238.501	244.548	483.049	489.241	492.914	982.155
7	2	0	15	21	766	563	[751,552,802,590]	276.276	232.163	242.051	474.214	460.791	480.122	940.913
7	2	0	15	22	646	616	[549,553,930,686]	649.909	233.813	253.182	486.995	480.562	527.959	1008.52
7	2	0	15	23	813	592	[752,568,1004,626]	318.18	218.11	238.964	457.074	428.101	467.577	895.678
7	2	0	15	24	51	595	[4,552,77,641]	226.549	196.258	204.51	400.768	391.454	415.382	806.836
7	2	0	15	25	189	606	[21,475,384,743]	381.048	218.077	252.624	470.701	477.37	487.968	965.338
7	2	0	15	26	174	750	[122,712,210,792]	456.495	212.42	233.615	446.035	432.481	469.165	901.646
7	2	0	15	27	394	727	[191,600,503,837]	446.6	233.959	247.584	481.543	470.359	493.72	964.079
7	2	0	15	28	882	783	[752,671,1013,913]	297.861	209.859	241.396	451.255	404.225	456.149	860.374
7	2	0	15	29	685	878	[456,635,864,1078]	512.515	234.805	264.138	498.943	481.812	499.177	980.989
7	2	0	15	30	1066	803	[1058,797,1078,815]	346.906	179.866	179.058	358.924	319.187	319.95	639.137
7	2	0	15	31	1009	838	[990,825,1027,858]	258.978	189.657	197.87	387.527	360.057	382.207	742.264
7	2	0	15	32	112	791	[44,743,347,891]	558.87	213.401	243.57	456.971	422.363	492.342	914.705
7	2	0	15	33	172	862	[63,813,336,1020]	587.008	215.437	241.159	456.596	415.012	484.307	899.319
7	2	0	15	34	419	922	[276,814,530,1078]	579.979	228.5	258.875	487.375	458.368	686.917	1145.29
7	2	0	15	35	128	924	[63,860,241,965]	441.15	207.85	231.342	439.192	396.093	448.656	844.749
7	2	0	15	36	50	891	[14,867,65,927]	375.816	192.16	206.368	398.528	373.756	394.412	768.168
7	2	0	15	37	28	901	[17,889,43,914]	253.784	186.955	184.772	371.727	360.225	354.784	715.009
7	2	0	15	38	248	909	[237,897,275,927]	462.149	227.349	235.664	463.013	432.3	451.254	883.554
7	2	0	15	39	159	1002	[83,903,293,1077]	411.031	205.95	231.619	437.569	392.738	451.735	844.473
7	2	0	15	40	222	1046	[173,1011,289,1078]	259.942	205.09	219.616	424.706	372.768	384.017	756.785
7	2	0	15	41	767	1055	[745,1030,820,1078]	211.472	205.183	208.861	414.044	394.039	530.989	925.028
7	2	0	11	1	108	42	[103,37,114,47]	316.446	182.511	182.511	365.022	325.25	325.25	650.5
7	2	0	11	2	558	139	[240,1,777,289]	301.717	220.898	224.446	445.344	416.293	421.402	837.695
7	2	0	11	3	975	79	[951,38,986,91]	251.648	185.997	186.134	372.131	326.073	323.574	649.647
7	2	0	11	4	998	89	[983,72,1012,105]	244.766	185.78	185.527	371.307	317.771	323.027	640.798
7	2	0	11	5	980	99	[956,87,990,112]	287.75	189.663	190.174	379.837	324.32	327.098	651.418
7	2	0	11	6	984	117	[971,105,1006,126]	409.475	193.612	197.633	391.245	338.975	345.856	684.831
7	2	0	11	7	951	123	[915,97,983,158]	276.721	192.92	196.135	389.055	341.227	350.081	691.308
7	2	0	11	8	1030	123	[1024,117,1036,129]	254.333	179.833	179.833	359.666	324.711	324.711	649.422
7	2	0	11	9	995	138	[976,115,1014,158]	461.319	192.716	207.919	400.635	335.311	352.016	687.327
7	2	0	11	10	1021	148	[1016,143,1032,164]	206.811	177.476	177.476	354.952	324.372	324.372	648.744
7	2	0	11	11	880	170	[823,120,966,208]	245.079	202.615	218.733	421.348	416.796	476.554	893.35
7	2	0	11	12	1044	495	[1029,473,1062,510]	196.801	182.552	180.18	362.732	758.307	827.367	1585.67
7	2	0	11	13	943	594	[927,574,990,618]	222.889	206.1	215.202	421.302	465.864	429.071	894.935
7	2	0	11	14	1018	623	[981,554,1067,705]	362.865	196.41	213.011	409.421	388.852	435.416	824.268
7	2	0	11	15	900	689	[874,660,945,715]	336.544	214.885	235.049	449.934	440.619	459.437	900.056
7	2	0	11	16	79	815	[24,783,223,847]	434.602	206.404	231.352	437.756	400.442	446.414	846.856
7	2	0	11	17	961	858	[914,817,1022,917]	208.544	196.607	207.768	404.375	368.978	393.104	762.082
7	2	0	11	18	922	934	[838,890,996,985]	467.213	200.929	222.815	423.744	365.326	438.694	804.02
7	2	0	11	19	861	976	[841,951,877,994]	356.279	209.453	212.779	422.232	381.166	400.189	781.355
7	2	0	11	20	733	851	[463,679,945,1078]	266.255	231.668	232.103	463.771	431.945	495.917	927.862
7	2	0	11	21	937	996	[882,969,993,1040]	310.235	194.044	205.537	399.581	342.761	370.981	713.742
7	2	0	11	22	887	977	[859,962,918,1018]	314.393	204.784	210.737	415.521	371.34	388.508	759.848
7	2	0	11	23	870	1021	[861,1011,884,1031]	324.155	204.441	205.983	410.424	358.695	361.762	720.457
7	2	0	11	24	896	1015	[868,1001,926,1045]	331.877	199.922	206.162	406.084	357.042	374.123	731.165
7	2	0	11	25	724	1050	[702,1021,772,1078]	257.611	214.13	219.729	433.859	385.71	424.118	809.828
7	2	0	11	26	850	1040	[832,1021,872,1056]	237.191	200.438	199.222	399.66	350.06	351.025	701.085
7	2	0	11	27	908	1043	[887,1017,950,1067]	302.152	191.047	196.383	387.43	344.161	358.252	702.413
7	2	0	11	28	1013	1051	[1009,1046,1023,1057]	303.321	178.165	178.165	356.33	316.917	316.917	633.834
7	2	0	11	29	799	1060	[768,1039,863,1078]	317.362	204.675	218.074	422.749	355.563	385.415	740.978
7	2	0	11	30	881	1062	[847,1043,908,1078]	270.926	193.752	197.831	391.583	365.059	364.407	729.466
7	2	0	11	31	769	273	[613,1,1036,422]	242.109	216.078	220.885	436.963	417.267	469.569	886.836
7	2	0	11	32	326	900	[24,499,539,1078]	227.072	221.371	225.018	446.389	429.267	437.727	866.994
7	5	0	9	1	379	54	[284,1,459,134]	586.293	212.333	216.6	428.933	385.807	391.807	777.614
7	5	0	9	2	515	8	[496,1,540,17]	513.758	208.539	213.853	422.392	1129.18	3442.6	4571.78
7	5	0	9	3	543	100	[424,1,709,218]	489.203	223.587	225.807	449.394	499.757	6797.04	7296.8
7	5	0	9	4	235	45	[119,1,297,104]	382.928	194.021	202.672	396.693	347.018	372.72	719.738
7	5	0	9	5	62	86	[31,60,78,101]	520.923	180.689	182.865	363.554	315.764	330.433	646.197
7	5	0	9	6	1010	79	[977,40,1056,125]	370.029	180.332	181.912	362.244	306.779	321.02	627.799
7	5	0	9	7	934	154	[798,1,1050,329]	490.902	195.355	202.961	398.316	351.714	390.386	742.1
7	5	0	9	8	128	91	[62,18,282,161]	564.293	193.322	213.805	407.127	367.538	403.602	771.14
7	5	0	9	9	314	119	[249,66,380,190]	609.876	214.384	223.772	438.156	410.731	437.748	848.479
7	5	0	9	10	418	172	[365,116,513,240]	338.188	229.997	229.045	459.042	440.924	445.481	886.405
7	5	0	9	11	337	193	[301,157,451,283]	442.541	229.775	227.845	457.62	442.217	448.926	891.143
7	5	0	9	12	725	152	[566,1,924,357]	251.823	222.716	226.063	448.779	421.261	432.958	854.219
7	5	0	9	13	224	223	[41,136,329,323]	593.469	211.38	228.34	439.72	410.454	445.01	855.464
7	5	0	9	14	78	197	[22,185,89,243]	411.426	187.696	192.915	380.611	359.906	370.721	730.627
7	5	0	9	15	29	197	[1,157,68,239]	553.681	181.445	196.791	378.236	327.155	366.926	694.081
7	5	0	9	16	362	213	[350,204,371,225]	309.184	232.28	232.696	464.976	443.259	446.6	889.859
7	5	0	9	17	1071	247	[1060,241,1078,264]	208.665	172.507	170.401	342.908	306.056	301.743	607.799
7	5	0	9	18	485	249	[437,228,505,298]	799.828	238.927	255.598	494.525	468.791	522.719	991.51
7	5	0	9	19	45	260	[18,246,60,280]	601.487	184.3	191.992	376.292	349.196	369.109	718.305
7	5	0	9	20	549	261	[499,205,590,335]	258.81	239.901	243.876	483.777	459.931	463.8	923.731
7	5	0	9	21	498	321	[451,275,559,371]	248.009	242.359	244.187	486.546	467.708	468.673	936.381
7	5	0	9	22	345	293	[310,248,432,328]	574.613	235.758	244.904	480.662	452.785	474.374	927.159
7	5	0	9	23	118	283	[4,205,246,351]	262.906	200.283	207.281	407.564	389.128	407.635	796.763
7	5	0	9	24	761	303	[733,287,819,362]	1013.49	231.336	255.005	486.341	447.911	518.694	966.605
7	5	0	9	25	406	332	[352,283,468,413]	481.885	240.058	247.708	487.766	462.682	481.381	944.063
7	5	0	9	26	10	327	[1,314,22,344]	369.292	181.811	185.236	367.047	341.682	348.16	689.842
7	5	0	9	27	717	339	[656,312,813,387]	464.597	237.265	250.199	487.464	461.193	506.133	967.326
7	5	0	9	28	721	383	[703,363,783,401]	537.286	236.757	241.918	478.675	463.831	501.224	965.055
7	5	0	9	29	198	396	[7,302,375,502]	360.721	218.542	225.287	443.829	436.075	531.008	967.083
7	5	0	9	30	741	414	[677,378,799,453]	427.868	238.253	244.213	482.466	479.604	513.718	993.322
7	5	0	9	31	33	411	[1,343,69,486]	418.534	191.932	200.068	392	1581.63	658.169	2239.8
7	5	0	9	32	343	393	[281,370,379,453]	499.427	236.649	253.281	489.93	463.403	492.979	956.382
7	5	0	9	33	96	453	[12,399,157,518]	444.562	204.961	224.715	429.676	590.732	431.877	1022.61
7	5	0	9	34	385	430	[314,393,460,478]	590.698	238.742	243.857	482.599	466.677	499.841	966.518
7	5	0	9	35	740	457	[709,435,760,472]	790.785	241.734	250.685	492.419	553.681	695.456	1249.14
7	5	0	9	36	755	497	[693,442,786,544]	278.547	238.515	244.44	482.955	518.011	876.623	1394.63
7	5	0	9	37	253	496	[186,449,432,559]	431.338	232.124	224.723	456.847	458.502	475.507	934.009
7	5	0	9	38	48	488	[1,466,88,515]	248.541	195.283	200.367	395.65	1983.9	2972.66	4956.56
7	5	0	9	39	78	531	[1,503,106,560]	429.471	200.896	224.308	425.204	1042.71	3973.82	5016.53
7	5	0	9	40	38	545	[1,528,62,570]	383.667	195.702	204.537	400.239	479.039	444.917	923.956
7	5	0	9	41	158	556	[97,490,429,637]	756.613	223.129	230.807	453.936	445.575	461.047	906.622
7	5	0	9	42	29	561	[1,544,46,603]	382.993	193.073	202.208	395.281	373.053	396.255	769.308
7	5	0	9	43	40	591	[14,559,66,620]	825.473	196.913	214.298	411.211	386.15	423.532	809.682
7	5	0	9	44	844	558	[707,351,947,643]	282.414	226.237	227.812	454.049	482.926	1078.62	1561.55
7	5	0	9	45	986	464	[874,312,1078,644]	300.023	198.606	199.693	398.299	387.136	408.875	796.011
7	5	0	9	46	124	646	[1,556,177,702]	308.168	203.559	205.389	408.948	397.874	398.323	796.197
7	5	0	9	47	243	623	[214,599,316,658]	293.639	231.729	237.033	468.762	471.694	460.057	931.751
7	5	0	9	48	851	643	[821,631,867,658]	365.927	231.486	238.833	470.319	458.581	466.4	924.981
7	5	0	9	49	369	623	[307,543,546,665]	303.273	239.27	246.17	485.44	471.918	470	941.918
7	5	0	9	50	213	679	[164,625,312,756]	322.934	227.864	229.632	457.496	452.927	460.009	912.936
7	5	0	9	51	372	728	[293,634,501,808]	564.426	239.397	248.153	487.55	470.605	489.132	959.737
7	5	0	9	52	956	698	[735,599,1071,794]	554.473	209.645	226.187	435.832	437.35	476.923	914.273
7	5	0	9	53	50	695	[1,649,95,736]	498.115	197.142	211.525	408.667	372.877	405.566	778.443
7	5	0	9	54	1052	719	[1037,707,1072,747]	278.561	180.666	185.758	366.424	336.408	352.364	688.772
7	5	0	9	55	17	714	[1,697,29,745]	443.528	194.475	198.006	392.481	357.893	369.697	727.59
7	5	0	9	56	801	723	[772,709,813,737]	268.843	238.148	245.229	483.377	635.525	594.043	1229.57
7	5	0	9	57	27	733	[1,715,48,752]	296.703	195.286	199.508	394.794	362.03	368.475	730.505
7	5	0	9	58	227	740	[188,726,259,759]	321.128	229.136	233.419	462.555	443.461	450.197	893.658
7	5	0	9	59	76	769	[1,688,231,868]	452.549	207.416	208.352	415.768	389.805	381.979	771.784
7	5	0	9	60	258	766	[153,735,322,840]	617.931	229.168	241.574	470.742	442.929	457.798	900.727
7	5	0	9	61	266	840	[243,821,324,862]	491.458	234.198	237.344	471.542	447.845	467.099	914.944
7	5	0	9	62	293	805	[201,772,373,895]	234.533	232.865	236.356	469.221	445.067	430.422	875.489
7	5	0	9	63	140	866	[1,790,242,959]	528.382	208.791	232.098	440.889	385.629	420.755	806.384
7	5	0	9	64	945	844	[720,729,1057,968]	344.524	213.941	220.421	434.362	411.551	411.214	822.765
7	5	0	9	65	905	998	[788,872,1038,1078]	379.376	200.619	227.058	427.677	346.957	410.672	757.629
7	5	0	9	66	856	903	[844,891,865,913]	454.991	227.65	232.291	459.941	421.418	429.393	850.811
7	5	0	9	67	791	942	[697,871,872,995]	291.379	229.906	227.848	457.754	418.964	408.953	827.917
7	5	0	9	68	982	935	[956,915,1037,961]	330.369	187.148	196.098	383.246	343.891	368.874	712.765
7	5	0	9	69	429	923	[403,862,500,957]	315.792	238.007	237.671	475.678	469.811	480.55	950.361
7	5	0	9	70	861	942	[843,924,874,957]	326.408	218.438	226.786	445.224	393.567	408.582	802.149
7	5	0	9	71	168	940	[134,919,197,963]	206.462	213.366	210.515	423.881	384.365	373.254	757.619
7	5	0	9	72	224	945	[193,913,267,975]	257.621	221.826	225.155	446.981	403.568	395.672	799.24
7	5	0	9	73	719	945	[701,930,738,977]	540.711	239.23	246.414	485.644	435.543	448.566	884.109
7	5	0	9	74	59	959	[1,927,89,1003]	386.773	191.724	201.609	393.333	333.78	359.2	692.98
7	5	0	9	75	317	911	[234,805,442,1006]	394.986	233.161	232.357	465.518	443.067	436.252	879.319
7	5	0	9	76	609	951	[564,925,630,984]	449.141	241.142	244.461	485.603	447.799	462.875	910.674
7	5	0	9	77	121	972	[58,913,218,1057]	213.325	203.752	217.839	421.591	356.451	405.072	761.523
7	5	0	9	78	433	979	[389,902,500,1003]	323.787	234.419	241.324	475.743	454.79	443.11	897.9
7	5	0	9	79	467	985	[457,969,476,995]	421.376	234.481	240.446	474.927	449.255	459.079	908.334
7	5	0	9	80	484	965	[469,924,522,996]	460.853	237.405	243.126	480.531	518.201	456.684	974.885
7	5	0	9	81	512	983	[479,957,541,1016]	523.908	238.311	241.519	479.83	464.193	483.992	948.185
7	5	0	9	82	43	1001	[8,975,63,1030]	225.981	185.093	189.936	375.029	310.31	318.295	628.605
7	5	0	9	83	230	987	[205,968,257,1012]	500.202	220.324	229.596	449.92	391.757	403.879	795.636
7	5	0	9	84	771	1007	[720,961,803,1055]	320.83	229.821	237.798	467.619	392.5	395.894	788.394
7	5	0	9	85	224	1041	[116,955,302,1078]	667.48	205.67	231.824	437.494	359.216	402.069	761.285
7	5	0	9	86	113	1022	[100,1008,124,1033]	332.732	193.451	194.107	387.558	343.463	366.402	709.865
7	5	0	9	87	495	1025	[471,984,547,1057]	306.375	232.535	237.474	470.009	424.335	421.158	845.493
7	5	0	9	88	96	1048	[61,1021,123,1078]	255.783	187.092	189.326	376.418	313.944	319.171	633.115
7	5	0	9	89	35	1043	[5,1018,63,1074]	220.608	180.3	181.752	362.052	298.42	304.736	603.156
7	5	0	9	90	683	1021	[561,927,797,1078]	781.346	230.149	242.73	472.879	398.226	426.848	825.074
7	5	0	9	91	458	1050	[424,957,590,1078]	299.073	227.414	227.725	455.139	406.938	397.807	804.745
7	5	0	9	92	72	1071	[63,1063,87,1078]	281.4	181.13	181.08	362.21	303.189	307.94	611.129
7	5	0	9	93	360	1018	[265,930,441,1078]	291.545	220.803	209.556	430.359	397.232	369.212	766.444
7	5	0	9	94	542	928	[500,876,583,962]	246.357	241.021	242.883	483.904	465.666	461.73	927.396
7	5	0	9	95	650	392	[610,377,663,440]	276.473	248.8	250.571	499.371	479.497	479.535	959.032
7	5	0	9	96	640	470	[625,453,655,496]	481.633	255.262	259.013	514.275	498.176	504.103	1002.28
7	5	0	24	1	381	121	[173,1,681,254]	466.06	216.16	224.97	441.13	431.048	451.316	882.364
7	5	0	24	2	681	167	[496,34,856,321]	607.617	227.193	250.527	477.72	443.47	542.027	985.497
7	5	0	24	3	465	312	[314,219,581,402]	657.11	242.059	256.866	498.925	545.551	568.401	1113.95
7	5	0	24	4	697	394	[578,235,869,542]	607.579	236.344	261.456	497.8	470.115	580.289	1050.4
7	5	0	24	5	557	413	[464,352,652,486]	468.647	250.261	253.036	503.297	508.253	521.288	1029.54
7	5	0	24	6	310	420	[101,256,490,587]	510.737	235.154	247.599	482.753	530.263	520.317	1050.58
7	5	0	24	7	932	485	[887,446,957,506]	2703.66	233.71	285.738	519.448	27002.8	45860.6	72863.4
7	5	0	24	8	834	536	[729,334,1028,776]	6410.2	218.25	287.029	505.279	1850.86	47893.2	49744.1
7	5	0	24	9	534	569	[408,458,708,671]	512.288	251.87	657.876	909.746	501.43	879.142	1380.57
7	5	0	24	10	473	684	[266,576,534,839]	516.327	243.417	240.976	484.393	576.752	748.982	1325.73
7	5	0	24	11	271	721	[106,583,492,854]	551.64	228.859	243.153	472.012	494.161	696.55	1190.71
7	5	0	24	12	731	757	[501,537,941,1007]	523.043	239.65	252.145	491.795	467.818	501.319	969.137
7	5	0	24	13	493	958	[119,839,701,1078]	490.05	226.66	233.25	459.91	481.397	451.008	932.405
7	5	0	17	1	533	51	[446,1,612,117]	3059.91	222.238	237.421	459.659	5017.55	6485.25	11502.8
7	5	0	17	2	364	66	[235,1,463,153]	708.407	214.434	241.021	455.455	528.717	573.269	1101.99
7	5	0	17	3	875	109	[779,3,974,198]	498.614	205.064	231.352	436.416	382.886	429.955	812.841
7	5	0	17	4	729	153	[669,1,840,218]	546.697	219.529	245.406	464.935	420.851	474.867	895.718
7	5	0	17	5	231	112	[110,9,375,251]	518.655	213.622	237.479	451.101	1172.25	857.756	2030.01
7	5	0	17	6	655	77	[576,1,758,233]	512.128	224.737	244.927	469.664	486.281	481.367	967.648
7	5	0	17	7	504	251	[492,245,515,273]	663.455	311.602	315.68	627.282	555.488	543.77	1099.26
7	5	0	17	8	619	329	[318,77,923,439]	495.31	243.889	248.24	492.129	532.071	492.147	1024.22
7	5	0	17	9	1002	306	[952,267,1049,365]	701.244	198.018	215.458	413.476	395.855	467.567	863.422
7	5	0	17	10	191	287	[26,156,325,448]	548.118	213.903	276.412	490.315	1547.46	34405.1	35952.6
7	5	0	17	11	343	395	[262,303,462,525]	489.735	239.171	230.034	469.205	670.49	517.88	1188.37
7	5	0	17	12	214	437	[190,399,253,477]	502.055	223.754	234.327	458.081	862.995	488.593	1351.59
7	5	0	17	13	103	472	[23,428,245,518]	489.3	210.45	239.192	449.642	461.24	467.817	929.057
7	5	0	17	14	264	513	[1,434,326,598]	494.726	215.014	235.145	450.159	507.29	482.453	989.743
7	5	0	17	15	599	555	[362,400,866,708]	583	243.649	253.178	496.827	504.022	580.28	1084.3
7	5	0	17	16	845	647	[649,446,1033,900]	3350.06	225.922	250.864	476.786	1504.97	20180.4	21685.4
7	5	0	17	17	274	627	[51,545,365,709]	518.36	225.681	246.279	471.96	465.054	490.685	955.739
7	5	0	17	18	93	670	[1,608,144,718]	500.426	204.81	217.426	422.236	397.356	431.059	828.415
7	5	0	17	19	955	770	[890,739,1004,790]	497.962	209.109	228.632	437.741	611.197	514.189	1125.39
7	5	0	17	20	459	714	[342,581,692,837]	5400.67	246.308	284.045	530.353	1120.18	41331.2	42451.4
7	5	0	17	21	355	764	[318,706,393,827]	512.691	239.676	243.362	483.038	1949.75	641.011	2590.76
7	5	0	17	22	182	740	[21,642,332,862]	509.786	222.734	241.816	464.55	470.821	689.378	1160.2
7	5	0	17	23	443	969	[347,800,614,1078]	6253.27	238.887	279.868	518.755	1637.6	36299	37936.6
7	5	0	17	24	703	936	[493,789,929,1078]	504.462	228.73	247.369	476.099	468.565	646.523	1115.09
7	5	0	17	25	455	60	[422,1,487,94]	2616.16	219.452	230.591	450.043	3356.5	4634.24	7990.74
7	5	0	17	26	913	364	[824,223,1025,458]	4081.81	214.682	250.727	465.409	9610.62	44466.5	54077.1
7	5	0	17	27	208	945	[29,801,458,1078]	3763.6	221.057	258.25	479.307	2492.54	26479.3	28971.8
7	5	0	12	1	661	63	[439,1,731,133]	650.771	222.388	239.835	462.223	850.151	1967.83	2817.98
7	5	0	12	2	793	127	[698,1,920,275]	4499.93	219.785	271.357	491.142	2042.24	48365.4	50407.6
7	5	0	12	3	599	266	[381,41,868,437]	939.514	238.402	260.78	499.182	455.659	531.514	987.173
7	5	0	12	4	260	342	[29,82,478,544]	581.597	226.264	229.888	456.152	442.812	477.209	920.021
7	5	0	12	5	1016	519	[994,455,1038,564]	4462.86	304.84	327.827	632.667	45959.4	54401.8	100361
7	5	0	12	6	1005	580	[954,559,1069,650]	670.508	255.378	218.119	473.497	11204.6	1638.33	12842.9
7	5	0	12	7	856	595	[748,445,1003,713]	565.367	228.833	230.518	459.351	1940.95	17490.8	19431.8
7	5	0	12	8	190	623	[5,506,343,826]	880.915	217.639	235.72	453.359	2986.28	942.848	3929.13
7	5	0	12	9	637	548	[498,437,762,967]	639.315	252.398	273.342	525.74	581.346	519.495	1100.84
7	5	0	12	10	433	617	[323,439,599,921]	615.045	246.336	249.098	495.434	695.993	512.477	1208.47
7	5	0	12	11	970	738	[937,677,1030,814]	606.271	208.767	221.944	430.711	3803.91	7614.5	11418.4
7	5	0	12	12	831	885	[699,696,974,1075]	6723.98	224.742	252.71	477.452	2852.75	37710.1	40562.8
7	5	0	12	13	245	780	[16,624,367,911]	9307.43	233.774	284.031	517.805	5433.85	53146.2	58580
7	5	0	12	14	953	812	[916,754,989,879]	2087.1	212.361	239.124	451.485	6674.26	20667.7	27342
7	5	0	12	15	217	927	[120,854,281,1040]	519.804	221.643	239.489	461.132	5818.75	10047.2	15866
7	5	0	12	16	417	942	[231,751,612,1078]	3844.35	234.729	245.799	480.528	3662.74	16306.4	19969.1
7	5	0	7	1	345	175	[115,33,526,427]	524.375	228.625	245.784	474.409	437.595	602.716	1040.31
7	5	0	7	2	182	305	[73,265,352,418]	477.184	214.16	240.893	455.053	430.663	470.885	901.548
7	5	0	7	3	58	362	[27,343,92,391]	513.489	188.371	199.3	387.671	420.379	510.156	930.535
7	5	0	7	4	251	391	[95,330,316,436]	550.648	217.578	238.341	455.919	436.447	504.571	941.018
7	5	0	7	5	279	459	[235,422,319,512]	615.789	228.985	239.116	468.101	454.92	487.179	942.099
7	5	0	7	6	534	393	[305,198,681,567]	597.564	246.187	253.199	499.386	487.782	505.654	993.436
7	5	0	7	7	143	440	[26,365,259,521]	534.903	208.271	234.898	443.169	438.258	485.227	923.485
7	5	0	7	8	791	392	[630,206,1027,549]	584.36	227.102	244.927	472.029	462.019	618.972	1080.99
7	5	0	7	9	435	549	[99,481,556,619]	721.388	229.795	256.381	486.176	509.615	854.975	1364.59
7	5	0	7	10	654	594	[548,466,931,744]	6965.77	254.887	310.279	565.166	1595.65	64527.8	66123.4
7	5	0	7	11	976	575	[863,531,1043,622]	545.315	203.955	222.649	426.604	398.796	443.257	842.053
7	5	0	7	12	301	595	[169,569,335,633]	468.284	225.533	237.54	463.073	452.929	479.67	932.599
7	5	0	7	13	42	582	[3,550,92,629]	486.433	191.914	207.433	399.347	384.868	422.961	807.829
7	5	0	7	14	44	654	[1,612,90,696]	513.772	193.248	208.368	401.616	417.21	474.351	891.561
7	5	0	7	15	965	656	[894,606,1048,704]	466.442	200.925	221.085	422.01	386.958	429.206	816.164
7	5	0	7	16	510	641	[130,574,598,717]	3537.78	234.413	257.455	491.868	1157.13	11985.6	13142.7
7	5	0	7	17	89	669	[59,637,155,704]	633.428	203.506	221.405	424.911	404.116	439	843.116
7	5	0	7	18	61	715	[5,678,165,774]	601.759	200.62	220.497	421.117	391.777	446.297	838.074
7	5	0	7	19	278	805	[114,677,621,912]	6573.2	233.132	270.298	503.43	1263.88	20876.5	22140.4
7	5	0	7	20	844	963	[663,666,1026,1056]	544	218.956	235.887	454.843	414.735	481.866	896.601
7	5	0	7	21	863	855	[802,796,979,896]	501.664	211.799	232.328	444.127	405.632	450.164	855.796
7	5	0	7	22	574	920	[373,732,769,1078]	686.56	233.015	246.119	479.134	441.45	484.202	925.652
7	5	0	7	23	116	949	[43,908,184,1021]	615.143	196.595	220.219	416.814	357.504	413.973	771.477
7	5	0	7	24	357	983	[153,884,468,1078]	412.406	218.095	234.877	452.972	401.404	435.057	836.461
7	5	0	7	25	1032	933	[1006,897,1055,960]	2039.33	180.427	179.112	359.539	11109.8	12444.6	23554.4
7	5	0	5	1	11	26	[1,12,24,48]	1175.89	166.273	166.273	332.546	4448.22	4448.22	8896.44
7	5	0	5	2	10	48	[1,43,16,56]	1030.36	170.723	170.723	341.446	9409.09	9409.09	18818.2
7	5	0	5	3	664	146	[503,1,943,291]	518.654	221.332	233.032	454.364	579.102	453.705	1032.81
7	5	0	5	4	374	144	[190,1,528,294]	622.652	217.164	225.242	442.406	1208.32	455.788	1664.11
7	5	0	5	5	230	359	[54,166,388,555]	4220.07	212.049	238.198	450.247	1189.73	11330.5	12520.2
7	5	0	5	6	419	456	[295,276,537,599]	754.813	239.887	253.972	493.859	489.054	700.563	1189.62
7	5	0	5	7	635	415	[516,285,744,566]	563.855	246.355	256.394	502.749	485.693	512.83	998.523
7	5	0	5	8	686	587	[558,482,786,684]	555.731	242.93	264.613	507.543	503.974	2964.95	3468.92
7	5	0	5	9	277	667	[30,498,451,834]	554.543	224.408	241.068	465.476	466.608	531.019	997.627
7	5	0	5	10	832	671	[705,553,1029,818]	565.509	219.749	236.544	456.293	486.184	494.86	981.044
7	5	0	5	11	553	671	[423,552,704,779]	580.575	245.003	254.821	499.824	494.758	520.59	1015.35
7	5	0	5	12	704	787	[578,692,806,963]	3275.24	245.533	261.897	507.43	5231.99	31709.5	36941.5
7	5	0	5	13	485	879	[320,746,633,1078]	600.051	236.471	257.944	494.415	463.447	499.958	963.405
7	5	0	5	14	231	956	[91,835,503,1078]	497.652	218.182	224.064	442.246	410.546	406.603	817.149
7	5	0	5	15	153	121	[86,3,201,184]	1565.4	188.572	180.59	369.162	2861.52	4252.41	7113.93
7	5	0	5	16	33	117	[1,73,66,164]	1331.69	180.145	179.88	360.025	5008.39	4662.11	9670.5
7	5	0	5	17	865	427	[723,177,1037,578]	5929.88	216.169	242.82	458.989	903.492	36641.4	37544.9
7	5	0	5	18	864	881	[665,781,995,992]	3198.17	220.435	249.177	469.612	4416.81	12343.3	16760.1
7	5	0	5	19	753	1004	[558,930,938,1078]	2602.67	218.976	248.833	467.809	1016	11820.3	12836.3
7	5	0	1	1	259	8	[240,1,304,25]	382.588	198.771	203.344	402.115	348.072	353.321	701.393
7	5	0	1	2	444	17	[411,1,483,34]	418.7	215.81	217.8	433.61	384.067	395.93	779.997
7	5	0	1	3	495	10	[481,1,507,21]	321.44	214.646	218.866	433.512	392.575	394.469	787.044
7	5	0	1	4	858	10	[838,1,870,19]	425.294	197.616	200.365	397.981	338.344	345.529	683.873
7	5	0	1	5	831	14	[819,1,853,28]	500.348	203.165	211.647	414.812	353.562	366.498	720.06
7	5	0	1	6	989	22	[963,12,999,34]	397.932	189.259	190.037	379.296	331.606	335.596	667.202
7	5	0	1	7	675	26	[646,1,735,52]	266.287	211.151	214.158	425.309	376.366	377.257	753.623
7	5	0	1	8	804	16	[789,1,842,41]	528.808	202.279	215.017	417.296	354.011	387.25	741.261
7	5	0	1	9	180	33	[159,11,188,51]	215.443	190.213	183.534	373.747	334.422	332.852	667.274
7	5	0	1	10	257	30	[215,1,276,47]	290.44	198.136	202.429	400.565	350.287	362.473	712.76
7	5	0	1	11	477	31	[462,15,502,49]	373.739	221.615	228.364	449.979	396.599	406.398	802.997
7	5	0	1	12	295	30	[270,3,312,59]	380.276	206.004	213.677	419.681	370.377	406.212	776.589
7	5	0	1	13	1036	35	[1032,30,1042,46]	289.915	175.508	175.508	351.016	298.347	298.347	596.694
7	5	0	1	14	439	57	[404,32,477,81]	467.117	223.362	232.156	455.518	406.882	413.536	820.418
7	5	0	1	15	781	51	[763,3,805,79]	447.442	209.147	216.481	425.628	371.587	395.817	767.404
7	5	0	1	16	244	66	[184,10,283,101]	240.337	200.086	209.888	409.974	358.278	380.022	738.3
7	5	0	1	17	297	83	[262,48,323,123]	496.137	214.211	220.168	434.379	391.053	394.146	785.199
7	5	0	1	18	526	20	[504,1,565,92]	548.067	221.296	224.9	446.196	415.601	429.556	845.157
7	5	0	1	19	675	67	[635,44,703,88]	257.924	218.932	220.814	439.746	404.904	456.992	861.896
7	5	0	1	20	601	47	[536,1,704,124]	268.922	221.147	238.623	459.77	406.993	428.887	835.88
7	5	0	1	21	355	49	[304,1,465,164]	442.963	219.347	227.799	447.146	405.199	441.104	846.303
7	5	0	1	22	634	111	[626,102,664,127]	413.71	226.226	234.98	461.206	430.246	443.16	873.406
7	5	0	1	23	329	115	[288,71,361,141]	458.631	219.833	221.638	441.471	411.748	425.475	837.223
7	5	0	1	24	912	109	[884,66,996,156]	562.725	195.547	205.526	401.073	351.186	388.384	739.57
7	5	0	1	25	51	125	[17,103,70,148]	346.141	197.483	191.302	388.785	12209	697.752	12906.8
7	5	0	1	26	122	141	[71,112,147,170]	589.343	196.678	207.63	404.308	370.652	394.931	765.583
7	5	0	1	27	1017	153	[1010,146,1025,162]	371.5	189.514	188.877	378.391	329.267	330.202	659.469
7	5	0	1	28	305	144	[182,60,344,181]	512.309	211.474	225.129	436.603	399.092	436.794	835.886
7	5	0	1	29	751	98	[542,1,891,191]	288.091	218.01	233.734	451.744	406.667	452.14	858.807
7	5	0	1	30	517	205	[399,134,567,334]	428.932	238.913	244.041	482.954	455.473	464.466	919.939
7	5	0	1	31	782	167	[560,95,894,248]	527.732	225.736	242.491	468.227	433.62	469.616	903.236
7	5	0	1	32	198	150	[97,62,320,248]	267.144	209.757	226.053	435.81	402.74	428.909	831.649
7	5	0	1	33	83	197	[63,169,139,216]	393.76	195.627	204.346	399.973	378.117	408.058	786.175
7	5	0	1	34	126	235	[49,211,159,260]	428.885	200.563	213.754	414.317	388.151	403.516	791.667
7	5	0	1	35	1073	229	[1068,224,1078,235]	287.253	166.091	166.091	332.182	304.091	304.091	608.182
7	5	0	1	36	348	227	[263,149,388,291]	335.134	231.704	247.309	479.013	439.933	479.928	919.861
7	5	0	1	37	328	279	[287,262,365,330]	348.29	245.729	248.626	494.355	449.988	461.069	911.057
7	5	0	1	38	357	280	[338,259,393,326]	544.316	250.136	262.537	512.673	458.942	466.147	925.089
7	5	0	1	39	187	238	[129,184,320,392]	400.014	226.292	248.088	474.38	441.352	464.537	905.889
7	5	0	1	40	183	296	[138,267,215,317]	488.035	220.222	237.307	457.529	426.245	454.386	880.631
7	5	0	1	41	319	329	[289,291,357,361]	566.087	250.043	256.424	506.467	455.782	477.033	932.815
7	5	0	1	42	85	315	[27,286,134,364]	335.289	199.946	214.2	414.146	386.544	408.756	795.3
7	5	0	1	43	295	315	[280,304,305,344]	684.437	249.444	255.527	504.971	464.804	483.784	948.588
7	5	0	1	44	203	366	[60,241,281,428]	486.206	218.669	234.773	453.442	431.883	450.897	882.78
7	5	0	1	45	858	287	[680,218,1005,377]	475.246	222.224	251.627	473.851	431.061	489.799	920.86
7	5	0	1	46	415	388	[314,325,446,420]	466.564	255.953	264	519.953	469.207	484.957	954.164
7	5	0	1	47	384	368	[373,354,406,384]	505.044	260.032	263.149	523.181	472.528	479.395	951.923
7	5	0	1	48	94	389	[36,363,155,417]	547.748	205.643	228.676	434.319	416.008	442.58	858.588
7	5	0	1	49	647	416	[545,326,757,522]	592.422	259.75	264.839	524.589	485.272	509.365	994.637
7	5	0	1	50	1008	396	[979,370,1028,431]	373.791	198.288	206.604	404.892	369.365	390.903	760.268
7	5	0	1	51	1005	459	[974,417,1033,478]	386.39	199.626	208.654	408.28	378.845	385.535	764.38
7	5	0	1	52	303	467	[25,379,493,566]	560.103	236.693	246.862	483.555	470.278	489.786	960.064
7	5	0	1	53	96	489	[41,462,157,517]	498.011	208.462	222.662	431.124	431.879	589.886	1021.76
7	5	0	1	54	96	526	[74,508,165,555]	478.125	216.033	233.287	449.32	537.767	610.301	1148.07
7	5	0	1	55	1018	527	[976,488,1064,554]	228.644	200.101	213.622	413.723	379.255	401.478	780.733
7	5	0	1	56	46	524	[1,491,88,567]	322.082	199.747	208.102	407.849	423.141	401.796	824.937
7	5	0	1	57	960	537	[929,518,1038,570]	323.822	206.988	212.703	419.691	434.356	632.449	1066.8
7	5	0	1	58	13	548	[1,524,29,576]	483.086	198.637	209.396	408.033	378.488	430.95	809.438
7	5	0	1	59	117	550	[96,529,160,568]	945.068	217.519	230.449	447.968	434.23	458.835	893.065
7	5	0	1	60	146	563	[125,549,163,579]	478.311	220.284	226.07	446.354	432.026	435.619	867.645
7	5	0	1	61	1009	595	[918,552,1043,628]	461.77	205.911	226.37	432.281	409.499	486.18	895.679
7	5	0	1	62	85	576	[18,551,125,605]	591.137	205.367	228.789	434.156	403.682	427.2	830.882
7	5	0	1	63	129	588	[89,573,158,619]	367.719	214.705	222.79	437.495	420.507	435.981	856.488
7	5	0	1	64	18	590	[1,571,43,620]	470.516	200.746	209.652	410.398	379.704	418.614	798.318
7	5	0	1	65	34	611	[1,598,48,662]	461.95	199.694	208.206	407.9	379.229	413.017	792.246
7	5	0	1	66	219	601	[45,519,441,653]	364.581	230.37	243.206	473.576	446.782	498.441	945.223
7	5	0	1	67	867	607	[736,526,1002,689]	388.005	238.913	244.085	482.998	453.502	498.229	951.731
7	5	0	1	68	40	641	[15,630,53,652]	589.871	204.713	216.727	421.44	396.119	438.935	835.054
7	5	0	1	69	206	672	[178,621,305,706]	276.754	234.715	243.325	478.04	449.714	468.64	918.354
7	5	0	1	70	161	654	[105,633,184,686]	257.605	215.851	224.839	440.69	420.456	427.847	848.303
7	5	0	1	71	258	670	[238,659,275,684]	397.361	239.582	244.676	484.258	456.811	463.63	920.441
7	5	0	1	72	84	675	[5,635,122,731]	332.76	201.114	207.659	408.773	386.843	409.395	796.238
7	5	0	1	73	896	684	[874,622,1053,751]	661.62	215.35	232.493	447.843	405.95	473.465	879.415
7	5	0	1	74	21	675	[1,647,58,703]	215.211	196.642	199.528	396.17	373.283	372.325	745.608
7	5	0	1	75	951	673	[913,653,982,702]	587.216	214.726	226.505	441.231	408.038	442.135	850.173
7	5	0	1	76	166	681	[134,667,187,695]	311.077	218.015	223.481	441.496	426.332	430.538	856.87
7	5	0	1	77	1004	682	[915,646,1045,738]	373.46	205.838	222.411	428.249	382.452	420.27	802.722
7	5	0	1	78	143	709	[84,672,182,736]	489.328	212.581	229.918	442.499	414.331	453.107	867.438
7	5	0	1	79	68	737	[25,694,139,791]	349.801	203.776	214.759	418.535	390.741	422.819	813.56
7	5	0	1	80	1052	737	[1041,726,1073,750]	474.196	193.609	200.962	394.571	351.319	371.057	722.376
7	5	0	1	81	17	759	[1,736,38,797]	463.373	192.357	196.174	388.531	360.567	372.927	733.494
7	5	0	1	82	785	723	[681,586,830,782]	370.62	249.193	244.603	493.796	473.289	451.835	925.124
7	5	0	1	83	655	688	[568,569,767,837]	408.051	253.349	254.761	508.11	488.521	488.026	976.547
7	5	0	1	84	648	773	[637,761,669,791]	345.102	258.091	257.37	515.461	490.25	492.231	982.481
7	5	0	1	85	768	775	[751,760,779,812]	262.696	242.27	243.321	485.591	458.494	457.098	915.592
7	5	0	1	86	868	759	[804,680,1029,825]	399.478	223.378	235.239	458.617	417.657	453.424	871.081
7	5	0	1	87	42	781	[34,771,51,790]	725.224	199.029	206.569	405.598	389.352	409.578	798.93
7	5	0	1	88	40	812	[1,773,86,844]	616.455	197.384	215.942	413.326	367.014	412.178	779.192
7	5	0	1	89	802	807	[763,769,851,844]	478.53	236.252	248.2	484.452	446.067	467.48	913.547
7	5	0	1	90	521	759	[437,644,598,845]	276.147	254.558	258.745	513.303	494.391	485.078	979.469
7	5	0	1	91	145	814	[97,790,178,841]	591.66	212.889	231.864	444.753	409.524	448.068	857.592
7	5	0	1	92	632	818	[580,752,703,864]	607.13	254.372	259.355	513.727	485.141	492.957	978.098
7	5	0	1	93	80	824	[53,786,101,844]	651.714	206.005	214.78	420.785	390.718	424.929	815.647
7	5	0	1	94	139	775	[96,745,209,837]	276.421	216.915	229.944	446.859	417.574	426.873	844.447
7	5	0	1	95	244	798	[151,740,371,854]	231.255	233.442	227.472	460.914	449.085	438.217	887.302
7	5	0	1	96	981	809	[934,756,1034,875]	384.227	202.326	215.89	418.216	366.22	393.092	759.312
7	5	0	1	97	711	824	[648,803,743,868]	272.364	248.51	252.263	500.773	469.731	499.01	968.741
7	5	0	1	98	900	839	[877,804,936,864]	378.376	219.791	223.913	443.704	401.529	418.456	819.985
7	5	0	1	99	907	893	[836,808,990,960]	302.472	212.447	230.613	443.06	383.734	424.226	807.96
7	5	0	1	100	952	866	[906,823,1004,911]	325.323	204.946	224.1	429.046	371.315	397.646	768.961
7	5	0	1	101	875	834	[856,801,890,848]	778.274	230.74	248.083	478.823	426.681	451.541	878.222
7	5	0	1	102	568	818	[541,783,594,848]	306.068	256.198	257.455	513.653	494.268	496	990.268
7	5	0	1	103	171	836	[153,817,186,853]	494.434	221.765	233.061	454.826	419.549	440.051	859.6
7	5	0	1	104	569	861	[540,844,601,886]	434.215	255.855	264.376	520.231	486.908	513.613	1000.52
7	5	0	1	105	485	844	[440,793,508,874]	463.32	252.619	268.7	521.319	478.032	502.62	980.652
7	5	0	1	106	29	855	[4,833,58,896]	340.311	195.291	200.713	396.004	349.643	369.823	719.466
7	5	0	1	107	814	887	[729,831,988,990]	241.944	223.029	233.656	456.685	404.597	438.056	842.653
7	5	0	1	108	439	855	[385,793,473,901]	366.16	251.48	258.593	510.073	467.616	472.64	940.256
7	5	0	1	109	193	865	[55,833,249,899]	445.128	219.93	233.776	453.706	412.237	435.248	847.485
7	5	0	1	110	712	880	[636,847,742,919]	414.993	244.651	247.882	492.533	452.993	473.632	926.625
7	5	0	1	111	522	864	[471,840,546,894]	361.576	255.048	270.404	525.452	485.963	505.576	991.539
7	5	0	1	112	583	898	[541,844,625,922]	448.027	252.61	266.721	519.331	469.688	485.586	955.274
7	5	0	1	113	1033	883	[1018,872,1043,904]	251.857	189.031	186.571	375.602	334.25	337.648	671.898
7	5	0	1	114	957	897	[936,870,996,929]	256.11	199.355	203.085	402.44	398.715	490.398	889.113
7	5	0	1	115	294	864	[17,774,440,1050]	259.995	226.508	251.827	478.335	416.605	444.741	861.346
7	5	0	1	116	373	888	[333,861,401,918]	864.283	248.847	273.327	522.174	458.939	503.142	962.081
7	5	0	1	117	433	907	[394,879,471,945]	587.261	250.598	255.548	506.146	455.435	469.765	925.2
7	5	0	1	118	387	931	[347,902,426,958]	300.887	246.056	243.34	489.396	451.518	485.206	936.724
7	5	0	1	119	323	945	[269,908,372,1065]	257.73	231.619	242.393	474.012	427.361	440.449	867.81
7	5	0	1	120	264	936	[212,902,299,1052]	466.055	226.848	242.814	469.662	422.504	432.827	855.331
7	5	0	1	121	608	939	[575,901,641,987]	344.057	246.537	246.707	493.244	496.154	455.301	951.455
7	5	0	1	122	706	975	[610,861,842,1078]	473.59	232.553	245.27	477.823	412.775	445.157	857.932
7	5	0	1	123	142	954	[121,928,165,972]	312.889	212.466	218.211	430.677	378.035	381.389	759.424
7	5	0	1	124	621	1017	[560,929,659,1078]	345.228	237.959	252.485	490.444	434.027	512.426	946.453
7	5	0	1	125	370	1025	[275,932,468,1078]	356.816	229.504	247.064	476.568	421.667	456.264	877.931
7	5	0	1	126	85	967	[25,929,136,1009]	446.217	200.179	212.304	412.483	343.797	372.543	716.34
7	5	0	1	127	218	977	[178,940,259,1010]	243.931	217.296	231.951	449.247	395.686	400.451	796.137
7	5	0	1	128	504	996	[488,971,527,1017]	412.465	243.271	244.904	488.175	433.966	439.281	873.247
7	5	0	1	129	778	999	[746,981,817,1043]	399.974	223.033	234.198	457.231	396.549	579.931	976.48
7	5	0	1	130	460	1032	[418,877,542,1078]	362.189	240.362	243.248	483.61	433.787	434.092	867.879
7	5	0	1	131	549	994	[507,888,616,1078]	383.105	240.395	247.172	487.567	436.878	433.167	870.045
7	5	0	1	132	233	1035	[177,998,271,1078]	322.88	210.243	217.609	427.852	410.862	381.967	792.829
7	5	0	1	133	782	1035	[769,1018,817,1078]	390.793	215.762	227.655	443.417	368.168	386.523	754.691
7	5	0	1	134	83	1039	[55,1021,102,1062]	389.24	192.395	195.393	387.788	324.346	330.827	655.173
7	5	0	1	135	176	1035	[153,1016,188,1054]	292.705	201.195	206.977	408.172	361.493	363.147	724.64
7	5	0	1	136	919	1020	[848,965,998,1078]	214.49	208.462	216.265	424.727	341.344	350.049	691.393
7	5	0	1	137	191	1055	[167,1029,221,1073]	828.54	198.516	195.973	394.489	543.997	559.79	1103.79
7	5	0	1	138	10	1070	[4,1057,24,1077]	405.599	178.032	178.032	356.064	304.724	304.724	609.448
7	5	0	1	139	142	1066	[124,1054,156,1078]	386.834	190.785	190.752	381.537	569.242	617.332	1186.57
7	5	0	1	140	163	1065	[154,1051,180,1078]	407.071	195.413	194.78	390.193	634.569	662.048	1296.62
7	5	0	1	141	932	1068	[918,1056,945,1078]	266.735	207.872	213.874	421.746	334.293	341.464	675.757
7	5	0	1	142	205	1069	[174,1061,225,1078]	545.731	197.791	196.214	394.005	482.301	463.207	945.508
7	5	0	1	143	254	1068	[238,1055,277,1078]	553.205	208.416	217.591	426.007	378.633	405.598	784.231
7	5	0	1	144	530	125	[432,23,568,175]	302.726	230.153	232.403	462.556	432.638	431.677	864.315
7	5	0	1	145	837	1023	[790,969,888,1078]	305.164	216.768	228.06	444.828	368.169	378.328	746.497
7	5	0	1	146	534	1055	[465,1029,566,1078]	519.352	228.982	241.11	470.092	408.075	421.169	829.244
7	5	0	1	147	809	458	[593,328,1036,599]	298.003	234.805	231.18	465.985	448.49	459.924	908.414
7	5	0	1	148	448	577	[136,517,548,773]	305.798	245.495	250.116	495.611	517.505	472.882	990.387
7	5	0	1	149	450	306	[365,147,553,414]	343.467	248.813	239.265	488.078	466.761	464.63	931.391
7	5	0	1	150	629	296	[540,144,901,397]	296.968	238.744	247.6	486.344	461.035	470.446	931.481
7	5	0	1	151	502	451	[437,386,583,525]	279.961	268.957	270.556	539.513	488.33	490.764	979.094
7	5	0	1	152	439	698	[301,594,575,779]	278.394	251.942	249.614	501.556	500.237	468.591	968.828
7	5	0	3	1	1040	7	[1033,2,1046,14]	299.061	169.965	169.965	339.93	289.763	289.763	579.526
7	5	0	3	2	92	47	[79,32,122,85]	578.636	185.865	189.413	375.278	319.083	329.935	649.018
7	5	0	3	3	960	64	[918,19,1008,92]	294.857	187.836	187.816	375.652	331.865	329.296	661.161
7	5	0	3	4	912	105	[847,47,1011,153]	404.036	196.814	204.982	401.796	348.808	368.268	717.076
7	5	0	3	5	284	158	[240,139,302,172]	328.214	209.592	215.612	425.204	420.79	477.306	898.096
7	5	0	3	6	964	165	[926,125,1023,206]	309.746	193.798	199.519	393.317	343.397	355.659	699.056
7	5	0	3	7	831	190	[764,135,942,248]	273.467	212.05	223.348	435.398	394.713	432.304	827.017
7	5	0	3	8	696	301	[541,1,1010,448]	412.287	226.287	235.775	462.062	426.84	1976.65	2403.49
7	5	0	3	9	91	262	[44,230,129,297]	232.139	192.637	205.267	397.904	367.958	384.594	752.552
7	5	0	3	10	1016	297	[991,262,1051,367]	588.323	191.773	200.262	392.035	345.967	370.506	716.473
7	5	0	3	11	396	233	[102,36,567,397]	447.359	225.15	241.431	466.581	447.869	458.065	905.934
7	5	0	3	12	135	335	[39,282,217,408]	441.815	202.796	219.608	422.404	573.658	439.862	1013.52
7	5	0	3	13	119	426	[20,337,292,500]	279.368	206.374	224.009	430.383	416.381	452.333	868.714
7	5	0	3	14	1021	495	[982,443,1063,529]	376.168	195.855	203.325	399.18	355.402	374.892	730.294
7	5	0	3	15	333	482	[61,339,633,576]	268.742	234.905	236.918	471.823	467.77	971.704	1439.47
7	5	0	3	16	38	533	[1,477,81,587]	454.984	192.603	197.602	390.205	375.701	477.817	853.518
7	5	0	3	17	874	487	[680,354,1040,593]	586.474	221.286	235.879	457.165	426.195	459.319	885.514
7	5	0	3	18	1030	672	[1008,657,1054,689]	350.03	191.356	196.667	388.023	349.125	360.626	709.751
7	5	0	3	19	1033	693	[1007,682,1056,716]	308.891	189.627	194.233	383.86	345.011	355.233	700.244
7	5	0	3	20	1010	727	[968,666,1041,757]	263.164	195.29	198.189	393.479	374.979	388.377	763.356
7	5	0	3	21	132	709	[8,650,189,758]	563.247	207.558	227.404	434.962	437.759	474.548	912.307
7	5	0	3	22	82	718	[7,682,111,744]	238.515	201.439	223.447	424.886	1185.63	4123.3	5308.93
7	5	0	3	23	881	729	[870,708,909,753]	467.727	216.17	229.136	445.306	418.571	506.568	925.139
7	5	0	3	24	158	737	[144,728,171,748]	431.931	221.855	230.508	452.363	482.703	483.723	966.426
7	5	0	3	25	60	756	[1,710,102,793]	314.385	199.388	213.249	412.637	2259.12	1516.38	3775.5
7	5	0	3	26	141	832	[24,761,220,877]	371.238	212.235	231.869	444.104	515.719	543.836	1059.56
7	5	0	3	27	69	800	[1,772,102,827]	558.864	200.041	206.812	406.853	390.33	407.587	797.917
7	5	0	3	28	447	790	[310,709,557,869]	440.509	248.254	254.861	503.115	470.691	479.242	949.933
7	5	0	3	29	339	848	[320,802,365,871]	265.17	243.706	238.968	482.674	450.584	449.234	899.818
7	5	0	3	30	267	776	[36,685,328,945]	402.338	224.155	244.375	468.53	685.356	453.221	1138.58
7	5	0	3	31	891	909	[805,828,1019,970]	565.573	207.776	241.469	449.245	412.749	446.656	859.405
7	5	0	3	32	964	915	[936,874,1007,952]	487.282	192.899	208.362	401.261	361.951	376	737.951
7	5	0	3	33	1029	905	[1010,886,1043,918]	278.5	184.188	183.676	367.864	323.535	325.669	649.204
7	5	0	3	34	795	943	[691,888,962,1078]	729.528	217.103	244.83	461.933	378.949	450.283	829.232
7	5	0	3	35	264	1035	[155,903,359,1078]	469.954	218.344	244.426	462.77	402.344	456.676	859.02
7	5	0	3	36	104	969	[53,937,180,1029]	222.281	201.678	204.89	406.568	348.574	372.486	721.06
7	5	0	3	37	678	1000	[499,800,827,1078]	471.624	244.359	250.134	494.493	433.005	446.777	879.782
7	5	0	3	38	130	1013	[101,966,180,1059]	242.833	196.628	205.75	402.378	340.111	366.824	706.935
7	5	0	3	39	552	1001	[504,969,605,1078]	614.407	229.687	247.356	477.043	422.08	457.4	879.48
7	5	0	3	40	474	1023	[414,961,527,1078]	254.835	226.512	231.948	458.46	409.636	422.423	832.059
7	5	0	3	41	854	1014	[840,994,875,1027]	298.131	203.889	204.78	408.669	360.427	361.018	721.445
7	5	0	3	42	874	1028	[862,1010,893,1045]	270.707	198.477	204.162	402.639	342.647	351.434	694.081
7	5	0	3	43	851	1034	[841,1024,870,1048]	315.046	200.086	204.537	404.623	347.334	353.398	700.732
7	5	0	3	44	746	1041	[729,1023,760,1056]	408.213	216.798	224.082	440.88	377.174	394.238	771.412
7	5	0	3	45	789	1056	[738,1027,849,1078]	327.33	204.938	215.058	419.996	352.466	369.777	722.243
7	5	0	3	46	996	1057	[981,1045,1004,1071]	298.394	179.914	177.373	357.287	299.146	300.81	599.956
7	5	0	3	47	276	75	[146,1,362,149]	247.131	203.74	211.778	415.518	1031.09	793.905	1824.99
7	5	0	3	48	428	908	[324,835,522,1078]	238.153	237.679	252.857	490.536	436.181	455.034	891.215
7	5	0	3	49	226	948	[155,864,361,1053]	264.339	221.809	245.339	467.148	471.316	457.911	929.227
7	5	0	3	50	329	1025	[302,995,371,1078]	246.447	218.475	228.845	447.32	390.492	406.728	797.22
7	5	0	3	51	31	1022	[26,1012,36,1027]	345.202	185.289	185.371	370.66	310.421	310.101	620.522
7	5	0	3	52	569	1052	[529,1015,612,1078]	270.559	223.286	225.276	448.562	410.666	403.937	814.603
7	5	0	3	53	701	587	[598,471,1045,746]	260.309	228.515	229.121	457.636	441.508	516.395	957.903
7	5	0	3	54	504	618	[62,494,610,748]	416.705	234.793	248.038	482.831	469.624	479.972	949.596
7	5	0	3	55	702	805	[543,648,1025,925]	242.69	239.318	246.512	485.83	448.065	479.336	927.401
7	5	0	25	1	602	27	[526,1,657,60]	307.422	210.772	216.941	427.713	381.413	402.971	784.384
7	5	0	25	2	121	76	[116,70,130,83]	259.284	178.326	178.326	356.652	330.645	330.645	661.29
7	5	0	25	3	93	77	[88,73,101,85]	192.236	176.775	176.775	353.55	318.258	318.258	636.516
7	5	0	25	4	157	98	[133,62,199,113]	350.566	189.032	191.474	380.506	348.197	362.179	710.376
7	5	0	25	5	249	96	[163,1,306,154]	267.811	205.86	216.441	422.301	372.436	398.693	771.129
7	5	0	25	6	383	82	[238,1,480,175]	402.953	217.145	223.506	440.651	404.425	444.012	848.437
7	5	0	25	7	871	86	[822,6,954,134]	455.52	198.507	214.5	413.007	355.288	430.275	785.563
7	5	0	25	8	931	134	[853,107,987,158]	474.609	197.711	213.64	411.351	360.542	430.329	790.871
7	5	0	25	9	134	198	[86,162,172,251]	255.761	192.766	193.645	386.411	376.668	395.913	772.581
7	5	0	25	10	922	188	[865,153,987,248]	429.065	199.636	205.943	405.579	371.629	417.732	789.361
7	5	0	25	11	356	214	[268,148,418,274]	268.64	223.464	229.461	452.925	435.322	449.337	884.659
7	5	0	25	12	838	225	[788,204,875,257]	390.794	216.205	218.657	434.862	421.221	450.853	872.074
7	5	0	25	13	875	256	[803,206,992,310]	463.304	208.581	226.478	435.059	405.839	484.122	889.961
7	5	0	25	14	238	257	[135,138,399,425]	674.212	218.374	238.283	456.657	436.843	476.881	913.724
7	5	0	25	15	913	317	[819,273,1006,387]	297.67	207.353	220.202	427.555	406.272	464.457	870.729
7	5	0	25	16	1000	334	[969,301,1036,375]	272.089	194.086	207.049	401.135	362.139	365.154	727.293
7	5	0	25	17	271	366	[210,331,327,407]	471.45	221.226	234.67	455.896	450.074	464.991	915.065
7	5	0	25	18	188	340	[152,300,216,388]	427.584	208.631	215.463	424.094	430.068	452.7	882.768
7	5	0	25	19	75	437	[43,420,90,461]	230.129	199.739	211.849	411.588	406.787	408.495	815.282
7	5	0	25	20	198	458	[74,306,346,588]	487.895	220.647	234.574	455.221	451.912	493.259	945.171
7	5	0	25	21	1013	501	[994,478,1054,530]	554.084	192.239	199.73	391.969	379.165	395.107	774.272
7	5	0	25	22	90	524	[38,452,132,564]	241.912	201.02	214.745	415.765	428.831	428.49	857.321
7	5	0	25	23	1021	565	[991,538,1039,593]	421.62	191.691	198.884	390.575	372.706	389.922	762.628
7	5	0	25	24	866	639	[808,590,1003,680]	231.766	211.815	225.106	436.921	422.856	455.213	878.069
7	5	0	25	25	1021	599	[1014,590,1059,627]	221.44	188.659	186.945	375.604	361.807	363.956	725.763
7	5	0	25	26	147	673	[118,658,168,687]	263.113	207.298	211.361	418.659	414.285	422.699	836.984
7	5	0	25	27	1052	682	[1042,670,1064,693]	670.424	190.886	193.179	384.065	365.402	374.947	740.349
7	5	0	25	28	67	687	[19,656,117,718]	345.333	195.869	203.989	399.858	399.958	440.097	840.055
7	5	0	25	29	83	733	[53,702,117,752]	240.533	201.152	202.962	404.114	399.219	408.267	807.486
7	5	0	25	30	140	711	[105,670,169,743]	334.023	207.88	210.143	418.023	416.929	437.18	854.109
7	5	0	25	31	39	737	[8,713,67,766]	221.329	191.01	191.712	382.722	375.591	389.541	765.132
7	5	0	25	32	930	759	[900,739,979,786]	377.098	208.838	220.587	429.425	412.933	538.272	951.205
7	5	0	25	33	183	808	[93,769,205,897]	387.267	211.432	214.658	426.09	420.721	444.925	865.646
7	5	0	25	34	249	824	[85,743,316,916]	431.041	219.261	229.566	448.827	435.348	465.74	901.088
7	5	0	25	35	91	827	[23,773,161,893]	225.08	201.284	212.159	413.443	386.439	419.455	805.894
7	5	0	25	36	329	834	[301,812,389,860]	437.429	233.061	251.752	484.813	462.309	490.15	952.459
7	5	0	25	37	1010	849	[1000,842,1037,865]	435.667	190.184	193.159	383.343	354.381	375.705	730.086
7	5	0	25	38	203	943	[115,692,545,1012]	506.42	228.247	244.17	472.417	465.847	482.071	947.918
7	5	0	25	39	719	783	[575,632,996,1065]	563.33	232.6	243.651	476.251	450.139	469.358	919.497
7	5	0	25	40	802	892	[793,882,833,901]	342.925	234.443	239.484	473.927	437.908	450.699	888.607
7	5	0	25	41	492	941	[229,720,623,1078]	369.28	234.119	240.16	474.279	456.846	499.072	955.918
7	5	0	25	42	843	911	[756,887,908,941]	443.564	224.238	241.366	465.604	415.566	461.129	876.695
7	5	0	25	43	848	1034	[741,889,910,1078]	268.904	218.151	235.412	453.563	388.359	442.395	830.754
7	5	0	25	44	819	935	[806,913,881,956]	429.891	223.134	238.417	461.551	409.408	435.962	845.37
7	5	0	25	45	1048	932	[1043,922,1053,939]	308.565	175.351	175.351	350.702	304.458	304.458	608.916
7	5	0	25	46	908	959	[791,916,964,1022]	542.139	208.587	237.611	446.198	377.725	442.806	820.531
7	5	0	25	47	727	992	[687,959,764,1059]	613.762	224.559	239.545	464.104	407.864	437.538	845.402
7	5	0	25	48	779	1032	[744,1002,832,1078]	465.625	212.789	227.85	440.639	380.243	407.331	787.574
7	5	0	25	49	453	1062	[411,1022,468,1078]	252.448	221.313	231.324	452.637	434.09	420.657	854.747
7	5	0	25	50	424	1061	[388,1040,443,1078]	353.243	216.713	224.272	440.985	429.641	421.631	851.272
7	5	0	25	51	361	1056	[334,1028,395,1078]	342.814	213.529	221.866	435.395	420.763	420.206	840.969
7	5	0	25	52	781	564	[674,471,1001,647]	341.284	221.826	232.265	454.091	446.963	475.655	922.618
7	5	0	25	53	327	681	[81,544,522,821]	244.116	231.401	235.743	467.144	464.123	470.518	934.641
7	5	0	25	54	607	370	[359,82,971,667]	651.981	236.522	258.526	495.048	468.843	519.703	988.546
7	5	0	22	1	402	81	[273,1,751,162]	295.541	220.749	222.945	443.694	422.229	398.028	820.257
7	5	0	22	2	892	114	[752,1,1003,275]	351.244	200.599	186.697	387.296	351.226	331.9	683.126
7	5	0	22	3	213	159	[39,1,366,378]	228.544	206.621	210.16	416.781	380.844	409.288	790.132
7	5	0	22	4	433	456	[279,374,503,543]	220.962	247.94	258.066	506.006	470.295	479.175	949.47
7	5	0	22	5	558	486	[549,478,566,494]	221.585	255.808	255.808	511.616	475.782	475.782	951.564
7	5	0	22	6	560	503	[550,494,568,523]	222.749	255.45	256.049	511.499	481.353	482.131	963.484
7	5	0	22	7	534	550	[502,527,564,596]	221.241	252.846	258.446	511.292	477.544	483.458	961.002
7	5	0	22	8	462	551	[371,519,518,587]	220.722	248.953	247.96	496.913	472.54	471.206	943.746
7	5	0	22	9	138	538	[1,361,262,722]	214.348	206.073	197.326	403.399	409.257	400.303	809.56
7	5	0	22	10	182	836	[12,674,377,1077]	293.011	210.823	207.913	418.736	410.976	797.5	1208.48
7	5	0	22	11	574	241	[434,71,766,385]	242.612	240.129	248.627	488.756	453.439	523.699	977.138
7	5	0	22	12	298	357	[104,153,470,522]	225.995	232.827	238.46	471.287	445.656	452.399	898.055
7	5	0	22	13	775	345	[561,175,1004,574]	223.401	229.326	245.908	475.234	437.859	469.673	907.532
7	5	0	22	14	600	457	[497,372,862,613]	228.276	246.845	251.162	498.007	470.021	481.401	951.422
7	5	0	22	15	514	501	[465,466,557,535]	222.119	255.896	256.241	512.137	480.081	478.588	958.669
7	5	0	22	16	708	671	[542,515,866,822]	221.321	244.328	250.23	494.558	465.988	488.254	954.242
7	5	0	22	17	472	759	[253,516,655,949]	237.469	240.209	245.322	485.531	474.434	483.044	957.478
7	5	0	18	1	8	10	[1,1,18,23]	601.703	176.432	176.432	352.864	409.256	409.256	818.512
7	5	0	18	2	104	6	[97,1,115,14]	500.253	175.61	175.61	351.22	4307.64	4307.64	8615.28
7	5	0	18	3	46	13	[37,7,61,20]	586.266	170.064	170.064	340.128	7760.75	7760.75	15521.5
7	5	0	18	4	337	49	[228,1,413,99]	402.735	210.823	225.637	436.46	419.814	411.257	831.071
7	5	0	18	5	171	112	[153,83,194,132]	442.66	198.201	200.223	398.424	363.08	375.947	739.027
7	5	0	18	6	134	123	[108,97,187,154]	595.844	197.007	212.74	409.747	361.741	404.636	766.377
7	5	0	18	7	836	167	[797,145,903,192]	452.443	213.142	221.88	435.022	401.559	423.016	824.575
7	5	0	18	8	371	130	[222,56,407,195]	521.54	217.006	233.341	450.347	423.572	482.413	905.985
7	5	0	18	9	44	197	[37,187,70,213]	389.257	192.921	192.594	385.515	342.984	344.96	687.944
7	5	0	18	10	978	255	[959,205,1022,282]	410.675	198.35	202.107	400.457	1478.56	1163.18	2641.74
7	5	0	18	11	225	257	[145,225,295,287]	541.73	214.915	226.061	440.976	421.266	455.704	876.97
7	5	0	18	12	992	290	[957,271,1023,318]	463.102	204.933	219.611	424.544	12660.5	19753.6	32414.1
7	5	0	18	13	944	306	[926,288,966,324]	486.246	210.973	217.91	428.883	10715	11178.1	21893.1
7	5	0	18	14	124	286	[78,235,169,342]	426.007	202.522	212.979	415.501	395.365	428.789	824.154
7	5	0	18	15	787	322	[752,300,857,349]	527.076	230.826	247.924	478.75	465.945	484.818	950.763
7	5	0	18	16	717	211	[593,29,908,357]	719.047	233.684	277.738	511.422	463.688	537.822	1001.51
7	5	0	18	17	986	327	[942,303,1009,352]	2407.27	211.372	216.851	428.223	14920.1	14600.6	29520.7
7	5	0	18	18	904	348	[882,329,940,373]	411.463	213.77	215.661	429.431	659.835	494.091	1153.93
7	5	0	18	19	407	361	[304,334,456,391]	422.813	243.103	252.791	495.894	525.274	528.099	1053.37
7	5	0	18	20	443	241	[231,63,576,390]	455.438	241.769	264.3	506.069	533.716	1037.83	1571.55
7	5	0	18	21	205	341	[112,272,284,407]	808.122	217.326	243.237	460.563	432.105	475.396	907.501
7	5	0	18	22	976	404	[930,332,1031,494]	5073.74	211.304	234.847	446.151	9652.83	22693.4	32346.2
7	5	0	18	23	455	421	[361,382,496,458]	6801.97	256.993	290.19	547.183	11835	53599.2	65434.2
7	5	0	18	24	658	441	[641,420,679,463]	658.984	253.279	252.111	505.39	525.045	529.617	1054.66
7	5	0	18	25	877	415	[678,354,959,484]	604.301	228.983	263.184	492.167	602.13	534.718	1136.85
7	5	0	18	26	256	447	[130,368,414,508]	478.197	227.418	251.992	479.41	470.553	565.82	1036.37
7	5	0	18	27	618	444	[606,436,629,455]	1284.63	255.086	255.395	510.481	2194.99	2283.67	4478.66
7	5	0	18	28	114	463	[66,412,149,500]	618.295	200.1	218.841	418.941	402.849	436.852	839.701
7	5	0	18	29	621	464	[608,453,636,475]	894.383	264.238	272.179	536.417	643.687	586.235	1229.92
7	5	0	18	30	648	498	[594,439,748,546]	724.101	257.327	258.908	516.235	933.019	581.752	1514.77
7	5	0	18	31	498	491	[482,469,566,515]	429.014	254.858	256.624	511.482	680.112	675.617	1355.73
7	5	0	18	32	579	532	[515,495,647,590]	715.15	258.083	258.53	516.613	833.599	876.265	1709.86
7	5	0	18	33	441	523	[292,494,479,557]	495.241	244.819	250.405	495.224	516.885	536.319	1053.2
7	5	0	18	34	498	543	[447,487,624,610]	663.279	253.883	259.043	512.926	555.161	1128.76	1683.92
7	5	0	18	35	790	521	[639,436,966,615]	1914.12	237.668	259.64	497.308	495.044	1189.72	1684.76
7	5	0	18	36	554	592	[532,583,588,609]	1191.09	256.403	259.167	515.57	902.622	2414.28	3316.9
7	5	0	18	37	245	544	[166,499,497,624]	444.664	235.378	265.145	500.523	486.534	552.282	1038.82
7	5	0	18	38	677	631	[616,570,962,711]	2947.73	249.576	279.65	529.226	2750.58	22374.6	25125.2
7	5	0	18	39	595	629	[504,592,638,689]	3079.91	256.185	265.847	522.032	701.941	1991.72	2693.66
7	5	0	18	40	860	599	[823,573,945,624]	506.178	227.629	232.6	460.229	681.551	492.644	1174.2
7	5	0	18	41	221	631	[86,572,340,686]	403.576	220.67	249.394	470.064	468.587	1722.57	2191.16
7	5	0	18	42	377	630	[236,575,521,679]	430.193	242.22	251.818	494.038	506.124	714.932	1221.06
7	5	0	18	43	486	674	[436,643,514,707]	450.883	252.375	253.126	505.501	602.476	554.816	1157.29
7	5	0	18	44	559	662	[515,642,595,689]	3302.91	254.541	256.028	510.569	1488.49	1858.73	3347.22
7	5	0	18	45	943	707	[818,652,1002,766]	410.118	217.213	239.473	456.686	485.568	481.245	966.813
7	5	0	18	46	715	681	[692,664,748,697]	601.53	261.457	263.785	525.242	2350.05	2202.15	4552.2
7	5	0	18	47	354	709	[153,659,491,756]	583.369	234.896	248.434	483.33	497.822	833.951	1331.77
7	5	0	18	48	581	706	[504,661,628,736]	1244.31	252.446	252.721	505.167	873.693	1715.59	2589.28
7	5	0	18	49	753	719	[711,679,947,814]	823.176	238.241	301.344	539.585	4015.31	8761.55	12776.9
7	5	0	18	50	554	718	[542,709,567,729]	856.188	249.23	250.396	499.626	901.684	1020.44	1922.12
7	5	0	18	51	858	716	[781,685,954,782]	513.667	223.963	242.933	466.896	450.729	514.747	965.476
7	5	0	18	52	510	723	[475,697,536,751]	870.403	250.578	249.204	499.782	517.121	554.778	1071.9
7	5	0	18	53	464	732	[408,717,477,759]	507.476	247.127	248.305	495.432	519.938	536.288	1056.23
7	5	0	18	54	99	733	[79,718,111,749]	1026.48	227.1	230.867	457.967	2781.29	3277.56	6058.85
7	5	0	18	55	126	739	[103,672,150,757]	4811.45	232.582	286.184	518.766	4787.98	18833.7	23621.7
7	5	0	18	56	658	731	[647,720,682,755]	606.045	251.467	262.252	513.719	879.1	1539.2	2418.3
7	5	0	18	57	67	718	[22,622,112,796]	2583.75	230.112	272.183	502.295	10006.7	40086.8	50093.5
7	5	0	18	58	137	768	[87,746,173,792]	6971	328.922	406.201	735.123	10960.7	6586.15	17546.8
7	5	0	18	59	448	765	[431,749,467,797]	627.349	248.823	249.764	498.587	544.881	573.91	1118.79
7	5	0	18	60	565	756	[518,710,624,787]	1158.47	250.146	253.344	503.49	597.121	1093.66	1690.78
7	5	0	18	61	805	798	[727,745,920,845]	1435.1	233.449	249.696	483.145	942.064	4569.14	5511.2
7	5	0	18	62	644	812	[604,741,684,912]	615.937	249.488	298.029	547.517	727.814	5205.47	5933.28
7	5	0	18	63	267	788	[153,717,330,886]	770.997	227.645	247.149	474.794	2900.82	35940.9	38841.7
7	5	0	18	64	538	794	[508,775,609,809]	889.725	251.769	257.988	509.757	551.739	1032.35	1584.09
7	5	0	18	65	195	807	[116,765,236,882]	649.71	220.868	237.473	458.341	898.246	3680.62	4578.87
7	5	0	18	66	321	785	[311,776,339,810]	1136.91	243.83	252.857	496.687	16586.2	22189.1	38775.3
7	5	0	18	67	348	794	[314,780,370,845]	577.321	241.48	247.623	489.103	6039.23	12569.6	18608.8
7	5	0	18	68	344	766	[274,738,398,837]	582.242	240.964	253.817	494.781	3877.09	20503	24380.1
7	5	0	18	69	416	784	[355,744,451,833]	929.758	248.593	254.713	503.306	2905.18	6760.89	9666.07
7	5	0	18	70	333	816	[303,806,345,831]	767.906	236.994	241.504	478.498	2475.55	6507.79	8983.34
7	5	0	18	71	593	822	[520,802,619,839]	528.519	252.06	253.669	505.729	504.158	546.506	1050.66
7	5	0	18	72	737	814	[721,806,747,824]	1417.36	245.229	247.064	492.293	1211.1	1366.6	2577.7
7	5	0	18	73	377	820	[367,812,386,843]	455.837	246.709	248.51	495.219	3377.25	4532.77	7910.02
7	5	0	18	74	790	907	[674,810,948,1023]	1814.07	227.87	251.699	479.569	434.165	1221.12	1655.28
7	5	0	18	75	455	817	[395,795,486,864]	1087.05	257.896	275.011	532.907	8919.12	19774.2	28693.3
7	5	0	18	76	582	889	[510,829,648,1078]	501.053	244.678	265.646	510.324	466.931	552.549	1019.48
7	5	0	18	77	75	842	[52,821,98,863]	4503.97	622.054	494.099	1116.15	59767.4	63278.7	123046
7	5	0	18	78	358	850	[339,829,368,862]	557.594	243.037	246.973	490.01	1548.69	2513.74	4062.43
7	5	0	18	79	387	851	[366,824,405,870]	716.716	248.291	252.468	500.759	2748.43	5175.22	7923.65
7	5	0	18	80	467	1002	[361,802,564,1078]	5843.39	240.863	337.977	578.84	2813.02	44026	46839
7	5	0	18	81	371	857	[357,852,377,870]	935.921	245.782	247.888	493.67	3050.15	3406.3	6456.45
7	5	0	18	82	431	867	[407,841,453,892]	982.27	250.554	253.441	503.995	4303.42	6688.73	10992.1
7	5	0	18	83	334	1016	[266,866,427,1078]	592.106	228.92	243.088	472.008	457.558	1593.51	2051.07
7	5	0	18	84	448	877	[434,865,459,889]	2595.68	258.662	264.797	523.459	15709.7	23809.6	39519.3
7	5	0	18	85	239	952	[95,815,381,1077]	711.143	224.164	272.422	496.586	1242.98	35806.7	37049.7
7	5	0	18	86	420	903	[398,865,454,959]	599.048	245.408	251.095	496.503	907.231	5275.29	6182.52
7	5	0	18	87	675	994	[584,904,846,1078]	1158.87	228.113	248.209	476.322	431.955	1198.34	1630.29
7	5	0	18	88	183	1062	[147,1046,212,1078]	433.229	205.072	227.938	433.01	1221.31	2355.44	3576.75
7	5	0	18	89	629	399	[557,314,894,520]	901.107	247.834	254.761	502.595	561.199	672.661	1233.86
7	5	0	18	90	559	324	[464,180,615,418]	6573.24	267.961	321.282	589.243	5387.49	61506.4	66893.9
7	5	0	18	91	533	439	[284,400,580,508]	5290.43	265.381	360.023	625.404	9826.57	60438.8	70265.4
7	5	0	18	92	700	726	[622,681,743,781]	1139.96	252.374	256.834	509.208	1203.87	1521.89	2725.76
7	5	0	18	93	491	775	[458,739,540,820]	762.286	251.341	251.184	502.525	583.664	652.773	1236.44
7	5	0	18	94	700	797	[665,764,732,829]	1393.52	254.63	256.111	510.741	6056.95	8577.25	14634.2
7	5	0	16	1	502	204	[330,1,744,405]	629.095	229.821	250.941	480.762	436.711	477.491	914.202
7	5	0	16	2	794	243	[539,38,962,475]	645.535	228.044	249.338	477.382	439.693	524.089	963.782
7	5	0	16	3	341	439	[86,226,595,744]	760.435	231.679	243.739	475.418	525.475	518.885	1044.36
7	5	0	16	4	904	484	[750,313,1045,796]	614.386	210.383	226.723	437.106	406.83	463.255	870.085
7	5	0	16	5	746	737	[527,446,958,947]	615.984	236.718	241.119	477.837	1682.3	9487.93	11170.2
7	5	0	16	6	366	782	[112,512,487,933]	10788	227.437	317.889	545.326	1229.4	58912	60141.4
7	5	0	16	7	175	876	[21,532,332,1049]	6290.5	207.942	251.217	459.159	2202.26	59930.3	62132.6
7	5	0	19	1	942	17	[937,2,964,30]	422.198	186.052	181.165	367.217	1196.76	1862.1	3058.86
7	5	0	19	2	985	9	[971,2,1000,27]	1096.47	183.113	182.561	365.674	5617.03	6050.79	11667.8
7	5	0	19	3	1068	23	[1038,17,1078,31]	533.031	167.755	167.755	335.51	1816.36	1816.36	3632.72
7	5	0	19	4	625	43	[554,1,685,85]	429.732	217.607	230.474	448.081	389.815	432.196	822.011
7	5	0	19	5	182	55	[136,14,223,107]	583.843	218.46	238.411	456.871	374.249	409.124	783.373
7	5	0	19	6	269	46	[177,1,337,123]	461.196	222.724	246.283	469.007	1753.14	2228.28	3981.42
7	5	0	19	7	204	97	[184,48,236,112]	471	227.62	243.196	470.816	397.608	404.32	801.928
7	5	0	19	8	412	106	[376,59,449,149]	539.594	223.982	234.089	458.071	532.375	899.337	1431.71
7	5	0	19	9	507	66	[398,1,635,155]	469.607	224.694	240.078	464.772	644.212	467.866	1112.08
7	5	0	19	10	835	83	[742,2,946,176]	576.667	211.762	238.492	450.254	380.885	452.113	832.998
7	5	0	19	11	710	71	[633,1,792,176]	459.094	220.344	239.18	459.524	452.713	2669.12	3121.83
7	5	0	19	12	242	130	[136,82,299,231]	564.202	225.981	257.524	483.505	464.26	588.032	1052.29
7	5	0	19	13	521	153	[451,126,584,181]	676.906	232.994	252.813	485.807	453.503	541.982	995.485
7	5	0	19	14	310	179	[222,86,349,236]	604.964	223.912	236.436	460.348	2911.18	2278.08	5189.26
7	5	0	19	15	178	184	[85,147,229,234]	522.55	206.133	224.56	430.693	391.888	432.495	824.383
7	5	0	19	16	400	219	[146,136,485,309]	547.63	227.913	239.898	467.811	443.775	471.37	915.145
7	5	0	19	17	971	275	[952,259,988,290]	1834.83	326.03	468.81	794.84	10804.9	24803.9	35608.8
7	5	0	19	18	1015	279	[990,238,1036,293]	2411.61	257.15	434.971	692.121	4188.79	15605.5	19794.3
7	5	0	19	19	991	290	[981,269,1002,304]	2462.14	351.051	481.85	832.901	12016.6	21226.3	33242.9
7	5	0	19	20	1006	307	[992,287,1041,331]	2883.01	231.526	300.921	532.447	2367.6	6782.89	9150.49
7	5	0	19	21	956	299	[922,276,988,340]	1702.33	326.012	538.623	864.635	15750.1	47174.5	62924.6
7	5	0	19	22	988	313	[977,304,1009,333]	3366.17	257.127	389.111	646.238	4867.96	15797.5	20665.5
7	5	0	19	23	543	294	[288,115,651,409]	555.228	241.945	261.208	503.153	463.265	514.941	978.206
7	5	0	19	24	779	322	[549,118,972,524]	501.711	246.059	258.053	504.112	458.859	478.73	937.589
7	5	0	19	25	430	431	[242,325,526,506]	452.197	240.555	246.541	487.096	465.254	485.68	950.934
7	5	0	19	26	771	517	[662,449,1001,589]	711.221	231.979	260.049	492.028	446.129	488.071	934.2
7	5	0	19	27	559	526	[236,390,706,631]	609.322	247.723	262.713	510.436	476.086	499.408	975.494
7	5	0	19	28	45	520	[21,500,62,542]	430.695	196.12	199.563	395.683	386.809	396.438	783.247
7	5	0	19	29	17	530	[3,509,32,548]	551.401	195.229	201.707	396.936	420.551	408.144	828.695
7	5	0	19	30	355	570	[315,535,392,618]	468.25	238.542	244.021	482.563	482.056	486.986	969.042
7	5	0	19	31	203	513	[73,418,334,616]	508.291	220.275	245.16	465.435	436.969	473.034	910.003
7	5	0	19	32	957	575	[900,535,1029,628]	467.783	207.562	222.507	430.069	391.879	442.036	833.915
7	5	0	19	33	837	580	[801,553,983,629]	518.388	222.971	242.698	465.669	426.28	474.829	901.109
7	5	0	19	34	188	622	[48,562,268,691]	700.959	214.134	246.524	460.658	435.27	483.8	919.07
7	5	0	19	35	290	666	[79,584,347,751]	653.895	226.621	244.219	470.84	451.028	492.667	943.695
7	5	0	19	36	49	696	[8,662,83,735]	443.808	196.913	206.859	403.772	384.315	441.778	826.093
7	5	0	19	37	1073	762	[1069,753,1078,776]	745.837	173.376	173.376	346.752	2877.9	2877.9	5755.8
7	5	0	19	38	509	719	[237,602,606,850]	566.705	248.695	269.568	518.263	674.349	515.832	1190.18
7	5	0	19	39	694	671	[565,576,876,844]	439.989	247.655	259.057	506.712	493.154	496.932	990.086
7	5	0	19	40	674	813	[633,783,701,866]	2466.55	255.866	277.405	533.271	1215.73	5193.4	6409.13
7	5	0	19	41	803	816	[645,742,968,921]	8181.38	230.853	273.891	504.744	599.374	6758.69	7358.06
7	5	0	19	42	441	823	[314,765,570,888]	458.495	247.701	255.747	503.448	724.166	6742.67	7466.84
7	5	0	19	43	667	1003	[558,835,765,1078]	792.455	237.586	267.846	505.432	882.787	3923.63	4806.42
7	5	0	19	44	703	881	[660,867,724,938]	639.221	247.547	252.322	499.869	5240	9201.68	14441.7
7	5	0	19	45	344	916	[226,804,555,1040]	520.243	239.919	253.009	492.928	650.619	6872.5	7523.12
7	5	0	19	46	809	953	[714,865,956,1078]	402.713	220.605	243.775	464.38	759.482	4618.91	5378.39
7	5	0	19	47	703	923	[682,893,756,987]	2039.07	239.529	253.561	493.09	2312.23	17703.8	20016
7	5	0	19	48	36	920	[14,895,69,951]	475.845	193.697	194.464	388.161	339.482	387.155	726.637
7	5	0	19	49	131	1001	[68,941,181,1078]	4876.62	203.398	225.458	428.856	959.345	4075.11	5034.45
7	5	0	19	50	898	1033	[842,978,937,1077]	637.91	204.079	208.943	413.022	350.284	370.377	720.661
7	5	0	19	51	409	1029	[361,974,505,1078]	448.83	230.761	245.362	476.123	456.486	467.372	923.858
7	5	0	19	52	462	1045	[412,1006,543,1078]	454.726	230.024	241.528	471.552	421.718	562.274	983.992
7	5	0	19	53	512	1063	[485,1045,550,1078]	429.938	226.593	234.928	461.521	397.322	414.495	811.817
7	5	0	19	54	540	960	[401,883,614,1078]	873.832	241.211	254.12	495.331	3310.67	31538.5	34849.2
7	5	0	19	55	363	59	[313,1,411,172]	3302.41	220.917	238.522	459.439	4536.54	11205.7	15742.2
7	5	0	19	56	908	213	[859,146,978,276]	3624.75	220.898	261.745	482.643	12044.7	26370.3	38415
7	5	0	19	57	1002	854	[968,835,1025,871]	3861.23	198.325	199.84	398.165	563.231	666.322	1229.55
7	5	0	10	1	745	10	[726,1,762,20]	366.655	207.577	214.44	422.017	376.722	379.181	755.903
7	5	0	10	2	864	17	[853,4,897,28]	306.358	191.386	185.835	377.221	326.105	329.78	655.885
7	5	0	10	3	177	19	[160,1,206,43]	306.425	190.789	192.142	382.931	327.054	329.53	656.584
7	5	0	10	4	558	26	[506,1,596,64]	566.259	216.036	226.778	442.814	387.755	415.988	803.743
7	5	0	10	5	431	33	[395,1,462,76]	426.809	212.41	225.944	438.354	519.992	748.957	1268.95
7	5	0	10	6	488	28	[456,1,515,59]	415.815	214.519	227.413	441.932	394.7	441.272	835.972
7	5	0	10	7	159	60	[145,42,184,78]	325.618	191.504	194.337	385.841	332.784	336.18	668.964
7	5	0	10	8	294	35	[234,1,349,78]	529.029	201.714	215.197	416.911	363.174	415.624	778.798
7	5	0	10	9	459	66	[437,47,483,89]	340.286	221.563	224	445.563	659.866	1165.79	1825.66
7	5	0	10	10	600	45	[579,1,645,86]	349.719	217.137	226.052	443.189	421.924	429.686	851.61
7	5	0	10	11	609	72	[598,62,621,84]	315.066	224.962	227.95	452.912	409.539	415.256	824.795
7	5	0	10	12	518	71	[480,41,580,104]	414.313	225.741	234.673	460.414	412.524	430.147	842.671
7	5	0	10	13	813	57	[747,1,887,124]	382.521	207.379	222.851	430.23	370.887	396.091	766.978
7	5	0	10	14	559	119	[503,19,653,142]	322.367	227.646	237.933	465.579	421.04	420.111	841.151
7	5	0	10	15	378	79	[188,1,458,136]	371.473	211.836	230.473	442.309	441.88	567.791	1009.67
7	5	0	10	16	704	58	[618,1,773,142]	430.191	219.564	237.18	456.744	424.785	453.978	878.763
7	5	0	10	17	1023	120	[999,101,1044,171]	379.363	193.891	201.047	394.938	497.502	1056.17	1553.67
7	5	0	10	18	924	126	[874,80,957,166]	449.069	202.284	215.208	417.492	367.533	401.03	768.563
7	5	0	10	19	960	148	[909,85,1016,204]	452.546	197.987	205.374	403.361	350.46	359.006	709.466
7	5	0	10	20	727	151	[564,77,899,212]	1185.72	226.357	258.064	484.421	422.354	510.245	932.599
7	5	0	10	21	959	198	[937,183,975,213]	341.899	196.424	201.787	398.211	373.085	365.708	738.793
7	5	0	10	22	292	143	[224,69,493,215]	463.226	221.736	234.963	456.699	425.814	525.305	951.119
7	5	0	10	23	519	159	[351,89,550,257]	613.271	235.005	251.226	486.231	447.177	484.241	931.418
7	5	0	10	24	134	221	[82,177,168,260]	476.539	201.28	214.892	416.172	384.221	406.696	790.917
7	5	0	10	25	959	234	[904,214,1010,266]	410.496	201.298	218.316	419.614	366.827	390.162	756.989
7	5	0	10	26	860	235	[813,181,951,308]	388.243	213.332	227.565	440.897	461.458	2290.46	2751.92
7	5	0	10	27	25	267	[20,262,30,273]	396.485	186.649	186.649	373.298	349.701	349.701	699.402
7	5	0	10	28	115	271	[74,246,145,283]	421.585	200.168	208.809	408.977	388.394	400.372	788.766
7	5	0	10	29	566	228	[516,138,618,298]	400.538	239.273	243.635	482.908	454.37	470.692	925.062
7	5	0	10	30	130	311	[56,242,198,352]	506.26	207.57	225.729	433.299	413.592	453.531	867.123
7	5	0	10	31	692	300	[545,163,893,414]	555.688	238.851	259.473	498.324	474.609	625.045	1099.65
7	5	0	10	32	463	309	[317,200,554,384]	437.172	241.149	259.868	501.017	469.16	488.563	957.723
7	5	0	10	33	1012	360	[993,335,1024,376]	541.12	196.633	200.479	397.112	353.754	363.957	717.711
7	5	0	10	34	287	314	[96,145,404,427]	344.157	225.499	243	468.499	464.025	471.981	936.006
7	5	0	10	35	957	387	[902,306,1028,487]	562.186	204.039	223.48	427.519	429.735	1867.5	2297.24
7	5	0	10	36	194	443	[73,346,415,498]	435.261	225.853	243.841	469.694	509.991	487.057	997.048
7	5	0	10	37	431	427	[344,354,478,507]	483.052	245.077	253.278	498.355	497.593	502.371	999.964
7	5	0	10	38	294	532	[95,464,377,603]	553.906	229.486	240.792	470.278	708.915	528.235	1237.15
7	5	0	10	39	849	416	[679,357,965,507]	331.85	229.401	238.636	468.037	528.161	477.421	1005.58
7	5	0	10	40	61	490	[40,478,93,508]	381.019	197.675	201.843	399.518	417.939	432.972	850.911
7	5	0	10	41	773	523	[668,458,922,588]	474.358	233.129	251.306	484.435	751.173	483.784	1234.96
7	5	0	10	42	406	531	[334,442,488,583]	491.261	245.309	257.007	502.316	536.47	731.13	1267.6
7	5	0	10	43	122	549	[27,492,153,613]	370.447	201.753	207.266	409.019	406.785	453.851	860.636
7	5	0	10	44	552	445	[458,369,701,545]	456.395	251.362	270.395	521.757	531.116	624.217	1155.33
7	5	0	10	45	623	525	[568,463,717,604]	371.258	248.069	254.141	502.21	491.697	510.891	1002.59
7	5	0	10	46	172	554	[150,530,191,587]	335.615	212.699	214.844	427.543	506.937	552.413	1059.35
7	5	0	10	47	508	558	[411,526,625,590]	395.89	249.852	255.21	505.062	504.619	503.98	1008.6
7	5	0	10	48	54	552	[15,521,94,583]	492.126	198.427	208.2	406.627	389.951	425.295	815.246
7	5	0	10	49	217	564	[187,536,255,588]	400.761	221.959	222.358	444.317	468.412	451.642	920.054
7	5	0	10	50	930	524	[794,463,1011,604]	557.375	214.313	237.192	451.505	773.256	503.019	1276.28
7	5	0	10	51	1023	577	[1005,567,1038,595]	601.295	201.509	208.369	409.878	387.82	407.055	794.875
7	5	0	10	52	993	574	[980,560,1012,595]	314.035	198.26	199.301	397.561	719.434	688.646	1408.08
7	5	0	10	53	1028	599	[1009,590,1040,614]	406.236	194.949	196.385	391.334	361.026	368.012	729.038
7	5	0	10	54	853	622	[727,577,1005,674]	471.614	222.895	242.661	465.556	519.979	480.333	1000.31
7	5	0	10	55	777	586	[746,536,810,613]	454.2	234.485	239.175	473.66	451.769	480.008	931.777
7	5	0	10	56	523	614	[303,564,694,663]	550.8	248.301	271.513	519.814	774.086	543.452	1317.54
7	5	0	10	57	709	615	[651,577,735,688]	344.412	242.692	252.77	495.462	1232.86	7030.8	8263.66
7	5	0	10	58	753	682	[688,621,878,734]	414.162	237.099	254.085	491.184	518.646	1531.19	2049.84
7	5	0	10	59	430	637	[276,595,566,699]	422.102	245.231	250.732	495.963	484.704	516.882	1001.59
7	5	0	10	60	922	717	[858,623,1026,780]	431.69	210.641	231.14	441.781	408.28	433.74	842.02
7	5	0	10	61	156	701	[46,660,220,732]	558.625	208.172	221.602	429.774	411.884	449.125	861.009
7	5	0	10	62	554	750	[490,639,655,811]	502.927	252.111	263.848	515.959	597.19	608.984	1206.17
7	5	0	10	63	464	714	[264,635,540,758]	390.481	243.229	249.846	493.075	704.07	488.452	1192.52
7	5	0	10	64	656	719	[596,668,896,802]	718.588	240.822	268.664	509.486	457.555	514.08	971.635
7	5	0	10	65	253	739	[112,627,339,824]	475.336	225.475	250.738	476.213	662.593	486.159	1148.75
7	5	0	10	66	101	762	[23,705,201,837]	324.431	207.504	217.872	425.376	433.763	427.743	861.506
7	5	0	10	67	928	820	[833,750,1016,884]	429.983	211.926	234.463	446.389	386.585	447.694	834.279
7	5	0	10	68	616	827	[541,753,897,1026]	387.913	242.93	254.365	497.295	467.616	475.127	942.743
7	5	0	10	69	80	855	[19,813,191,920]	403.549	207.604	226.239	433.843	427.126	432.375	859.501
7	5	0	10	70	456	845	[177,678,612,1078]	719.988	243.857	271.78	515.637	519.04	494.601	1013.64
7	5	0	10	71	747	913	[657,822,919,1009]	487.536	231.629	251.986	483.615	442.453	463.686	906.139
7	5	0	10	72	1001	877	[987,850,1020,898]	419.462	193.593	198.985	392.578	354.086	359.077	713.163
7	5	0	10	73	374	908	[326,877,411,953]	483.708	240.933	247.292	488.225	494.459	473.885	968.344
7	5	0	10	74	274	985	[85,864,373,1078]	327.877	220.475	252.525	473	630.361	13693.9	14324.3
7	5	0	10	75	886	971	[785,921,985,1011]	433.657	209.461	229.052	438.513	376.06	418.145	794.205
7	5	0	10	76	420	997	[320,932,476,1078]	520.084	233.07	258.641	491.711	445.522	473.844	919.366
7	5	0	10	77	838	992	[805,979,868,1008]	574.265	211.91	222.199	434.109	385.208	406.846	792.054
7	5	0	10	78	564	1024	[525,977,609,1078]	325.4	232.823	250.7	483.523	490.85	443.671	934.521
7	5	0	10	79	88	1002	[38,958,114,1065]	5711.27	216.076	248.728	464.804	12003.3	32135.4	44138.7
7	5	0	10	80	710	1045	[599,980,775,1078]	460.043	228.188	246.305	474.493	389.321	422.901	812.222
7	5	0	10	81	626	1037	[602,1027,650,1078]	628.253	229.754	247.753	477.507	436.08	591.883	1027.96
7	5	0	10	82	657	1054	[627,1028,685,1078]	346.698	226.965	231.168	458.133	440.642	873.436	1314.08
7	5	0	10	83	458	1061	[378,1038,492,1078]	338.952	224.243	235.096	459.339	390.709	427.269	817.978
7	5	0	10	84	138	970	[42,923,187,1078]	4202.26	209.2	232.752	441.952	7362	24106.7	31468.7
7	5	0	10	85	185	1061	[152,1044,224,1078]	512.449	203.99	212.159	416.149	381.112	394.906	776.018
7	5	0	13	1	662	9	[648,1,684,17]	599.917	214.032	222.667	436.699	382.164	400.828	782.992
7	5	0	13	2	138	21	[123,15,148,31]	377.029	194.432	196.781	391.213	391.237	394.131	785.368
7	5	0	13	3	653	40	[608,1,741,66]	506.106	215.624	229.381	445.005	383.237	420.248	803.485
7	5	0	13	4	906	27	[888,13,934,52]	566.338	195.079	200.128	395.207	333.982	368.008	701.99
7	5	0	13	5	1062	46	[1058,41,1074,51]	407.547	175.663	175.663	351.326	304.768	304.768	609.536
7	5	0	13	6	390	57	[309,1,456,121]	547.552	219.198	234.592	453.79	393.997	435.384	829.381
7	5	0	13	7	1015	79	[1008,71,1019,84]	362.791	187.099	187.099	374.198	342.769	342.769	685.538
7	5	0	13	8	975	87	[950,72,993,102]	365.008	192.87	190.272	383.142	335.243	341.344	676.587
7	5	0	13	9	281	55	[195,1,341,113]	575.54	207.453	228.54	435.993	370.134	418.19	788.324
7	5	0	13	10	807	53	[756,1,894,125]	439.602	207.547	229.049	436.596	366.373	423.301	789.674
7	5	0	13	11	227	108	[165,58,310,146]	666.133	207.218	222.344	429.562	384.061	423.222	807.283
7	5	0	13	12	528	80	[483,1,555,157]	619.395	226.539	247.575	474.114	432.091	479.503	911.594
7	5	0	13	13	437	124	[399,91,484,174]	488.319	232.62	249.44	482.06	436.595	502.44	939.035
7	5	0	13	14	110	167	[70,140,132,188]	464.599	198.437	203.235	401.672	377.797	380.681	758.478
7	5	0	13	15	1068	168	[1057,148,1078,182]	1691.85	194.443	194.508	388.951	16523.7	17243.9	33767.6
7	5	0	13	16	333	149	[314,127,352,167]	495.691	223.307	232.835	456.142	427.424	457.34	884.764
7	5	0	13	17	467	37	[431,1,548,185]	426.746	226.954	247.77	474.724	414.483	485.27	899.753
7	5	0	13	18	705	129	[608,1,896,213]	450.753	223.125	246.158	469.283	416.959	469.705	886.664
7	5	0	13	19	319	177	[304,149,337,194]	554.293	226.694	240.301	466.995	440.214	471.128	911.342
7	5	0	13	20	278	162	[242,124,321,192]	412.732	216.887	229.979	446.866	418.812	441.412	860.224
7	5	0	13	21	388	156	[304,98,496,211]	425.169	231.063	243.75	474.813	436.698	491.494	928.192
7	5	0	13	22	947	180	[900,131,1000,212]	445.138	214.558	355.309	569.867	1037.83	3965.79	5003.62
7	5	0	13	23	586	58	[489,1,634,233]	417.843	229.093	249.812	478.905	541.739	467.949	1009.69
7	5	0	13	24	11	192	[3,185,18,203]	367.368	188.592	187.599	376.191	324.897	324.941	649.838
7	5	0	13	25	999	202	[981,179,1024,230]	374.8	201.196	209.693	410.889	4635.76	3376.68	8012.44
7	5	0	13	26	977	238	[955,213,1000,261]	352.347	210.169	220.851	431.02	8530.21	12833	21363.2
7	5	0	13	27	500	229	[478,206,522,255]	522.11	244.234	251.575	495.809	463.05	485.26	948.31
7	5	0	13	28	753	229	[697,102,918,270]	651.847	221.85	247.521	469.371	429.578	469.563	899.141
7	5	0	13	29	459	230	[386,194,483,252]	551.286	239.001	250.027	489.028	454.901	484.625	939.526
7	5	0	13	30	855	233	[790,183,980,285]	517.707	215.504	230.773	446.277	1489.84	465.68	1955.52
7	5	0	13	31	285	249	[124,134,358,328]	388.869	218.463	234.832	453.295	437.634	469.898	907.532
7	5	0	13	32	139	286	[71,229,228,337]	443.249	206.512	218.266	424.778	446.277	477.905	924.182
7	5	0	13	33	63	268	[48,251,72,282]	392.971	194.227	197.718	391.945	381.495	400.544	782.039
7	5	0	13	34	392	259	[329,166,436,317]	432.967	236.251	249.63	485.881	491.201	506.761	997.962
7	5	0	13	35	608	201	[516,139,678,296]	659.272	241.394	279.584	520.978	457.283	535.816	993.099
7	5	0	13	36	678	255	[500,201,732,400]	505.65	246.886	267.876	514.762	477.119	492.606	969.725
7	5	0	13	37	222	299	[163,258,264,337]	785.613	219.196	245.924	465.12	508.112	556.311	1064.42
7	5	0	13	38	473	301	[396,244,565,385]	969.732	247.58	273.561	521.141	474.751	528.417	1003.17
7	5	0	13	39	750	291	[605,260,797,365]	380.576	241.558	255.891	497.449	458.694	482.554	941.248
7	5	0	13	40	899	309	[820,266,1009,365]	374.772	213.149	232.957	446.106	695.183	453.772	1148.95
7	5	0	13	41	798	341	[754,268,960,414]	598.942	225.66	239.283	464.943	432.545	483.072	915.617
7	5	0	13	42	282	365	[233,302,331,407]	570.22	229.176	246.753	475.929	553.357	589.241	1142.6
7	5	0	13	43	208	372	[117,350,246,481]	15982.3	279.381	384.35	663.731	21128.2	62148.3	83276.5
7	5	0	13	44	618	375	[575,292,798,403]	633.042	246.877	268.774	515.651	468.716	523.054	991.77
7	5	0	13	45	382	370	[301,310,461,449]	707.474	240.376	258.076	498.452	496.592	519.398	1015.99
7	5	0	13	46	100	381	[26,330,133,404]	411.116	202.902	219.126	422.028	510.878	813.526	1324.4
7	5	0	13	47	185	401	[166,379,220,422]	10180.7	240.216	296.833	537.049	18806.1	54642.6	73448.7
7	5	0	13	48	711	442	[568,332,826,543]	547.083	245.899	264.628	510.527	470.601	519.615	990.216
7	5	0	13	49	431	422	[396,341,499,450]	767.76	247.33	257.519	504.849	487.364	499.606	986.97
7	5	0	13	50	1000	432	[971,367,1039,463]	387.336	201.228	215.564	416.792	373.678	431.919	805.597
7	5	0	13	51	974	377	[940,330,1028,439]	426.929	206.689	215.738	422.427	383.275	417.497	800.772
7	5	0	13	52	244	427	[185,391,307,472]	466.403	225.158	235.629	460.787	523.381	606.968	1130.35
7	5	0	13	53	871	435	[793,388,946,490]	451.324	224.583	239.238	463.821	543.907	510.743	1054.65
7	5	0	13	54	325	453	[288,399,360,481]	634.908	233.933	244.889	478.822	496.578	507.026	1003.6
7	5	0	13	55	961	458	[920,426,998,496]	421.182	209.229	216.768	425.997	405.573	410.131	815.704
7	5	0	13	56	190	458	[163,419,227,479]	449	219.37	227.704	447.074	592.628	590.453	1183.08
7	5	0	13	57	53	451	[25,419,71,493]	490.414	200.553	202.131	402.684	581.805	533.258	1115.06
7	5	0	13	58	520	432	[359,377,571,502]	404.129	250.325	250.172	500.497	486.57	495.484	982.054
7	5	0	13	59	836	488	[799,468,871,532]	610.484	230.569	244.164	474.733	440.363	456.352	896.715
7	5	0	13	60	875	532	[816,471,944,591]	679.432	221.9	244.56	466.46	427.497	468.24	895.737
7	5	0	13	61	984	531	[908,460,1068,642]	417.851	211.426	242.553	453.979	393.918	459.34	853.258
7	5	0	13	62	115	574	[1,469,165,646]	3520.51	221.236	254.889	476.125	14003.5	46331.8	60335.3
7	5	0	13	63	209	517	[157,451,402,584]	407.969	229.365	244.892	474.257	1208.28	490.309	1698.59
7	5	0	13	64	74	525	[43,440,112,560]	4906.93	211.045	242.153	453.198	12517.1	32472.3	44989.4
7	5	0	13	65	416	514	[357,459,450,573]	477.389	247.068	255.296	502.364	483.353	496.62	979.973
7	5	0	13	66	34	536	[20,522,54,571]	406.293	199.069	207.909	406.978	1415.56	1769.23	3184.79
7	5	0	13	67	568	520	[435,449,651,589]	539.866	253.343	261.929	515.272	491.832	514.488	1006.32
7	5	0	13	68	30	564	[5,556,44,584]	515.762	198.344	206.286	404.63	1994.79	2273.26	4268.05
7	5	0	13	69	273	582	[181,536,483,617]	743.852	233.257	266.394	499.651	482.164	510.979	993.143
7	5	0	13	70	683	559	[620,514,766,608]	822.029	245.128	263.245	508.373	481.668	515.51	997.178
7	5	0	13	71	515	573	[502,560,545,587]	491.175	252.387	263.087	515.474	500.418	511.417	1011.84
7	5	0	13	72	419	596	[404,581,437,610]	400.038	252.122	262.264	514.386	498.441	487.962	986.403
7	5	0	13	73	807	592	[751,532,970,652]	433.159	229.629	245.567	475.196	440.908	460.777	901.685
7	5	0	13	74	330	615	[151,569,491,662]	551.754	238.893	257.653	496.546	478.663	496.72	975.383
7	5	0	13	75	562	629	[485,578,691,674]	630.967	252.797	269.34	522.137	486.5	530.873	1017.37
7	5	0	13	76	722	618	[690,561,766,669]	550.327	242.515	252.815	495.33	471.179	517.728	988.907
7	5	0	13	77	627	675	[578,654,669,706]	567.909	253.832	260.435	514.267	491.809	519.713	1011.52
7	5	0	13	78	49	664	[24,640,69,685]	757.985	202.155	209.376	411.531	1871.2	609.556	2480.76
7	5	0	13	79	84	669	[58,637,114,698]	453.915	207.006	215.191	422.197	489.915	541.872	1031.79
7	5	0	13	80	1027	666	[995,634,1062,737]	478.577	203.754	213.39	417.144	360.16	388.862	749.022
7	5	0	13	81	532	683	[481,654,564,772]	397.606	255.863	263.798	519.661	489.611	518.49	1008.1
7	5	0	13	82	455	658	[408,613,504,742]	654.722	252.49	268.031	520.521	489.062	533.299	1022.36
7	5	0	13	83	53	686	[17,675,71,720]	382.905	198.956	204.053	403.009	423.646	443.779	867.425
7	5	0	13	84	348	667	[289,640,393,700]	559.674	240.962	257.685	498.647	476.049	504.935	980.984
7	5	0	13	85	492	719	[459,666,514,774]	495.041	254.885	268.327	523.212	487.866	501.422	989.288
7	5	0	13	86	698	699	[628,614,791,763]	433.16	246.797	257.276	504.073	484.229	508.757	992.986
7	5	0	13	87	270	682	[83,608,336,806]	1317.43	229.394	382.905	612.299	612.266	10698	11310.3
7	5	0	13	88	365	714	[315,686,398,739]	409.804	244.087	257.155	501.242	479.994	495.845	975.839
7	5	0	13	89	852	693	[784,653,1004,737]	570.314	221.704	244.059	465.763	423.933	521.907	945.84
7	5	0	13	90	584	748	[486,672,763,810]	594.281	253.974	269.59	523.564	510.339	561.41	1071.75
7	5	0	13	91	957	646	[756,612,1006,793]	443.093	223.615	253.099	476.714	421.486	504.894	926.38
7	5	0	13	92	413	762	[303,654,491,869]	618	247.026	267.694	514.72	479.08	518.25	997.33
7	5	0	13	93	765	724	[751,710,775,745]	522.807	243.55	248.62	492.17	479.854	496.449	976.303
7	5	0	13	94	175	724	[47,656,290,794]	380.505	218.894	231.505	450.399	452.484	479.78	932.264
7	5	0	13	95	745	747	[724,724,765,795]	506.294	244.629	249.26	493.889	479.186	493.319	972.505
7	5	0	13	96	787	778	[758,746,836,802]	428.922	236.314	254.598	490.912	449.866	477.088	926.954
7	5	0	13	97	921	775	[898,768,932,783]	418.837	215.249	218.667	433.916	411.572	427.382	838.954
7	5	0	13	98	964	781	[928,730,1029,828]	401.677	204.634	217.881	422.515	384.463	417.813	802.276
7	5	0	13	99	300	820	[222,770,364,874]	610.764	233.692	257.421	491.113	482.911	500.528	983.439
7	5	0	13	100	915	798	[886,776,950,832]	359.286	213.076	229.704	442.78	395.48	410.602	806.082
7	5	0	13	101	121	800	[82,779,179,820]	535.968	214.566	227.774	442.34	428.281	460.742	889.023
7	5	0	13	102	186	803	[149,779,212,831]	450.704	220.899	227.878	448.777	448.557	463.571	912.128
7	5	0	13	103	450	804	[417,786,471,835]	443.754	248.368	263.708	512.076	485.429	529.362	1014.79
7	5	0	13	104	854	801	[758,770,949,874]	427.376	222.439	241.288	463.727	420.786	481.696	902.482
7	5	0	13	105	604	847	[538,774,671,1078]	8353.04	249.596	374.854	624.45	3894.16	47750.2	51644.4
7	5	0	13	106	75	807	[39,777,107,847]	426.459	205.599	214.018	419.617	405.873	419.165	825.038
7	5	0	13	107	848	856	[769,817,895,892]	550.89	224.725	249.159	473.884	422.614	486.531	909.145
7	5	0	13	108	167	838	[155,826,181,858]	661.992	222.63	230.333	452.963	454.036	475.127	929.163
7	5	0	13	109	128	843	[88,790,237,884]	520.74	220.839	235.599	456.438	448.266	490.75	939.016
7	5	0	13	110	446	829	[431,819,493,859]	450.88	249.653	256.85	506.503	483.762	507.98	991.742
7	5	0	13	111	669	929	[603,776,774,1078]	8830.35	242.843	327.417	570.26	2440.99	42805	45246
7	5	0	13	112	429	857	[324,829,465,893]	402.429	252.661	458.399	711.06	498.329	651.448	1149.78
7	5	0	13	113	515	825	[464,788,566,1035]	561.512	246.172	259.274	505.446	474.243	524.476	998.719
7	5	0	13	114	996	870	[978,853,1022,893]	490.461	194.384	196.194	390.578	348.533	362.534	711.067
7	5	0	13	115	479	860	[474,855,485,875]	620.641	253.619	257.37	510.989	495.536	511.467	1007
7	5	0	13	116	462	885	[444,855,524,1005]	397.518	242.868	253.573	496.441	461.095	501.555	962.65
7	5	0	13	117	942	873	[916,834,978,895]	478.381	203.955	214.295	418.25	374.532	390.669	765.201
7	5	0	13	118	741	883	[728,869,764,901]	442.893	243.924	254.852	498.776	472.741	483.082	955.823
7	5	0	13	119	800	888	[762,843,885,930]	642.372	230.215	245.9	476.115	433.299	473.906	907.205
7	5	0	13	120	307	898	[249,849,339,949]	482.899	232.214	238.987	471.201	537.251	630.101	1167.35
7	5	0	13	121	392	912	[320,869,480,957]	594	239.397	254.273	493.67	471.851	520.37	992.221
7	5	0	13	122	244	881	[216,834,274,915]	640.542	231.767	252.725	484.492	998.918	870.017	1868.93
7	5	0	13	123	814	969	[732,874,931,1056]	476.859	219.603	241.859	461.462	426.46	477.778	904.238
7	5	0	13	124	904	895	[877,869,992,947]	505.897	205.204	218.701	423.905	370.785	419.383	790.168
7	5	0	13	125	1043	904	[1027,892,1049,911]	363.4	191.137	190.536	381.673	333.443	341.245	674.688
7	5	0	13	126	1038	939	[1025,920,1046,950]	383.273	186.223	182.955	369.178	335.049	322.836	657.885
7	5	0	13	127	154	922	[57,830,294,1065]	2725.78	225.844	248.61	474.454	6887.32	19434.7	26322
7	5	0	13	128	184	1028	[157,944,224,1065]	3111.41	220.852	243.797	464.649	7644.44	17227.9	24872.3
7	5	0	13	129	743	1032	[689,964,800,1078]	523.43	220.157	237.871	458.028	388.699	424.032	812.731
7	5	0	13	130	410	1012	[320,946,516,1078]	436.939	231.761	251.636	483.397	437.999	449.356	887.355
7	5	0	13	131	78	995	[39,972,94,1029]	5203.38	225.308	257.522	482.83	26020.5	49588.5	75609
7	5	0	13	132	306	986	[216,945,343,1078]	2862.52	226.648	245.332	471.98	6086.42	25105.1	31191.5
7	5	0	13	133	280	1028	[264,1003,294,1048]	1732.51	227.746	230.544	458.29	9122.03	9999.39	19121.4
7	5	0	13	134	505	1045	[452,1003,545,1078]	518.815	229.012	242.253	471.265	420.6	504.096	924.696
7	5	0	13	135	312	1052	[292,1016,334,1078]	3783.59	225.231	248.564	473.795	8724.63	29031.3	37755.9
7	5	0	13	136	285	1062	[259,1035,303,1078]	1298.7	217.848	230.878	448.726	8784.88	8487.19	17272.1
7	5	0	13	137	883	1045	[839,1001,937,1078]	470.199	201.876	202.503	404.379	712.751	1233.22	1945.97
7	5	0	13	138	933	1046	[912,1023,957,1064]	424.995	196.964	201.061	398.025	331.022	344.64	675.662
7	5	0	13	139	559	1056	[534,1028,608,1078]	574.656	223.868	242.09	465.958	404.163	444.836	848.999
7	5	0	13	140	826	1060	[790,1038,856,1078]	550.813	207.99	214.229	422.219	366.923	387.958	754.881
7	5	0	13	141	1051	184	[1024,161,1068,205]	1511.34	193.893	193.15	387.043	15698.8	20552.4	36251.2
7	5	0	15	1	203	232	[132,192,254,298]	729.538	207.939	224.168	432.107	414.713	444.874	859.587
7	5	0	15	2	822	164	[692,60,952,322]	9239.94	217.61	264.77	482.38	2635	53363.2	55998.2
7	5	0	15	3	824	277	[797,240,869,307]	738	225.128	239.374	464.502	11246.8	39334.5	50581.3
7	5	0	15	4	472	189	[238,1,705,538]	810.615	234.694	269.304	503.998	768.548	713.407	1481.95
7	5	0	15	5	832	331	[790,240,925,361]	1022.26	233.805	345.054	578.859	3448.52	12783.8	16232.3
7	5	0	15	6	857	371	[822,317,916,447]	7403.99	273.782	393.536	667.318	17752.9	46775.7	64528.6
7	5	0	15	7	285	401	[94,216,502,552]	628.262	227.007	244.727	471.734	1497.06	550.953	2048.01
7	5	0	15	8	709	425	[512,268,866,703]	2639.46	243.412	259.22	502.632	2196.44	19600.9	21797.3
7	5	0	15	9	18	531	[1,503,41,555]	753.629	192.452	200.233	392.685	395.138	413.987	809.125
7	5	0	15	10	103	531	[39,500,129,557]	626.654	200.775	213.932	414.707	1393.17	4163.68	5556.85
7	5	0	15	11	146	543	[21,499,181,622]	2906.75	207.672	218.043	425.715	8713.16	17832.1	26545.3
7	5	0	15	12	358	570	[275,521,429,629]	768.947	234.947	239.874	474.821	537.07	508.905	1045.97
7	5	0	15	13	77	620	[6,598,118,674]	722.989	196.744	197.888	394.632	523.296	520.708	1044
7	5	0	15	14	448	591	[326,537,520,697]	737.924	238.718	242.247	480.965	517.865	529.312	1047.18
7	5	0	15	15	221	657	[97,535,343,783]	770.816	236.808	267.386	504.194	541.058	552.986	1094.04
7	5	0	15	16	97	765	[38,660,152,867]	3998.73	208.177	239.881	448.058	10543.3	46701.3	57244.6
7	5	0	15	17	172	774	[133,745,206,819]	657.922	216.479	237.913	454.392	585.623	522.078	1107.7
7	5	0	15	18	119	878	[63,812,172,951]	8406.02	213.431	259.673	473.104	12401.2	57631	70032.2
7	5	0	15	19	256	950	[111,796,413,1078]	4094.01	224.569	267.418	491.987	2557.97	46149.5	48707.5
7	5	0	15	20	510	803	[443,714,561,909]	2385.2	244.74	258.607	503.347	4195.06	15427.5	19622.6
7	5	0	15	21	32	1043	[1,1009,53,1074]	2132.74	183.64	182.343	365.983	5212.8	4944.47	10157.3
7	5	0	15	22	859	534	[752,445,954,629]	3604.04	273.41	403.962	677.372	24919.5	44706.2	69625.7
7	5	0	15	23	810	713	[752,603,934,766]	2730.41	230.692	245.156	475.848	2957.54	6329.66	9287.2
7	5	0	15	24	910	770	[802,649,1003,890]	4108.47	214.814	245.308	460.122	7798.36	39078.4	46876.8
7	5	0	15	25	434	745	[205,594,585,915]	2540.04	242.214	267.346	509.56	3977.86	10638.2	14616.1
7	5	0	15	26	628	907	[362,683,798,1078]	5662.53	237.625	323.457	561.082	2053.3	45426	47479.3
7	5	0	4	1	858	14	[839,1,903,28]	531.101	191.651	193.485	385.136	344.975	359.024	703.999
7	5	0	4	2	1070	51	[1059,29,1078,62]	1139.85	174.313	174.313	348.626	3129.67	3129.67	6259.34
7	5	0	4	3	771	34	[729,1,846,96]	484.052	201.682	210.113	411.795	369.474	419.082	788.556
7	5	0	4	4	457	183	[245,1,723,420]	541.531	227.072	246.959	474.031	439.725	486.929	926.654
7	5	0	4	5	84	181	[43,155,104,230]	452.271	187.974	191.178	379.152	347.17	363.972	711.142
7	5	0	4	6	181	155	[90,54,277,262]	425.911	201.853	211.95	413.803	386.797	429.693	816.49
7	5	0	4	7	830	158	[587,22,998,343]	5542.13	219.556	257.183	476.739	906.731	30205.4	31112.1
7	5	0	4	8	757	430	[555,305,921,580]	692.983	239.409	250.492	489.901	466.719	502.661	969.38
7	5	0	4	9	937	276	[829,217,1040,453]	6171.44	207.302	248.433	455.735	1525.72	23910.7	25436.4
7	5	0	4	10	972	348	[906,312,1026,386]	6155.7	204.664	254.02	458.684	3097.04	30379.8	33476.8
7	5	0	4	11	114	404	[33,366,254,490]	439.949	205.068	223.714	428.782	411.743	463	874.743
7	5	0	4	12	121	467	[80,430,162,503]	500.598	200.752	212.527	413.279	405.359	427.241	832.6
7	5	0	4	13	334	406	[41,240,529,576]	536.853	226.656	232.821	459.477	454.566	1894.33	2348.9
7	5	0	4	14	736	616	[613,510,845,729]	791.977	241.621	267.828	509.449	467.913	511.647	979.56
7	5	0	4	15	56	562	[1,487,95,604]	510.706	191.338	204.794	396.132	378.281	409.941	788.222
7	5	0	4	16	448	536	[374,427,627,628]	761.077	248.366	255.93	504.296	485.496	506.077	991.573
7	5	0	4	17	273	575	[235,531,289,596]	556.74	225.712	238.056	463.768	453.572	475.768	929.34
7	5	0	4	18	955	614	[878,519,1049,686]	547.05	202.542	213.512	416.054	389.026	432.314	821.34
7	5	0	4	19	318	659	[19,535,492,767]	662.856	221.997	233.096	455.093	443.441	481.808	925.249
7	5	0	4	20	514	637	[412,549,629,768]	492.83	248.561	245.202	493.763	482.694	507.436	990.13
7	5	0	4	21	660	724	[569,597,751,853]	624.865	247.352	267.988	515.34	471.794	510.092	981.886
7	5	0	4	22	110	782	[27,747,150,825]	599.335	204.625	229.324	433.949	413.303	479.723	893.026
7	5	0	4	23	157	744	[15,687,197,834]	561.123	205.669	223.086	428.755	399.777	445.85	845.627
7	5	0	4	24	852	845	[679,662,1058,1078]	522.082	215.249	223.827	439.076	395.775	412.064	807.839
7	5	0	4	25	90	837	[19,801,235,880]	490.895	206.481	236.211	442.692	420.208	452.453	872.661
7	5	0	4	26	49	888	[21,867,74,910]	494.345	193.733	203.98	397.713	352.655	374.176	726.831
7	5	0	4	27	315	918	[45,744,588,1078]	523.924	224.433	244.667	469.1	417.172	450.462	867.634
7	5	0	4	28	375	1068	[355,1058,387,1078]	444.154	213.758	220.048	433.806	377.179	386.692	763.871
7	5	0	21	1	37	13	[30,7,46,22]	557.297	176.086	176.086	352.172	337.731	337.731	675.462
7	5	0	21	2	224	33	[183,1,259,75]	230.892	196.927	198.171	395.098	353.098	363.351	716.449
7	5	0	21	3	26	48	[13,42,35,54]	242.438	165.259	165.259	330.518	278.358	278.358	556.716
7	5	0	21	4	165	74	[135,22,187,109]	239.152	192.856	194.159	387.015	336.097	343.955	680.052
7	5	0	21	5	573	78	[421,1,735,156]	317.554	220.456	223.911	444.367	408.231	432.515	840.746
7	5	0	21	6	328	59	[257,1,362,108]	301.966	207.652	212.966	420.618	383.748	407.305	791.053
7	5	0	21	7	271	77	[233,28,364,133]	252.648	210.265	223.773	434.038	392.543	411.739	804.282
7	5	0	21	8	710	93	[650,1,825,182]	373.86	215.879	227.51	443.389	391.885	439.24	831.125
7	5	0	21	9	808	156	[716,10,977,239]	255.282	210.485	221.397	431.882	382.275	427.527	809.802
7	5	0	21	10	105	204	[82,183,118,222]	261.926	191.873	188.667	380.54	370.305	364.546	734.851
7	5	0	21	11	217	136	[118,65,334,231]	310	210.475	219.931	430.406	397.643	437.657	835.3
7	5	0	21	12	163	196	[119,173,244,232]	240.208	202.901	207.354	410.255	402.911	413.573	816.484
7	5	0	21	13	123	242	[73,211,161,276]	310.774	195.653	201.22	396.873	392.766	415.36	808.126
7	5	0	21	14	396	143	[331,1,450,278]	372.737	222.798	237.412	460.21	420.263	476.079	896.342
7	5	0	21	15	926	276	[889,240,1026,310]	410.708	201.066	212	413.066	371.161	401.924	773.085
7	5	0	21	16	544	251	[421,54,668,404]	452.013	237.838	248.581	486.419	478.027	510.335	988.362
7	5	0	21	17	717	265	[621,169,849,408]	327.28	234.679	250.817	485.496	552.19	3404.58	3956.77
7	5	0	21	18	840	345	[573,257,953,445]	532.978	229.242	265.713	494.955	720.056	15271.8	15991.9
7	5	0	21	19	969	402	[919,374,1014,447]	365.436	201.886	207.557	409.443	383.134	405.943	789.077
7	5	0	21	20	99	398	[43,364,199,440]	339.451	206.03	216.255	422.285	417.352	457.961	875.313
7	5	0	21	21	154	430	[138,411,177,449]	449.673	210.929	217.684	428.613	427.732	442.061	869.793
7	5	0	21	22	777	493	[729,460,863,519]	270.944	232.466	244.289	476.755	460.673	496.633	957.306
7	5	0	21	23	695	472	[590,407,963,519]	511.66	233.378	247.129	480.507	658.944	613.218	1272.16
7	5	0	21	24	604	515	[536,400,697,597]	279.079	251.392	252.778	504.17	1729.22	9660.05	11389.3
7	5	0	21	25	1017	533	[985,475,1050,571]	274.553	193.145	195.348	388.493	372.627	367.298	739.925
7	5	0	21	26	862	531	[659,480,996,609]	287.621	221.252	251.168	472.42	643.463	3585.08	4228.54
7	5	0	21	27	1014	571	[991,549,1044,593]	289.209	191.78	192.627	384.407	373.501	402.527	776.028
7	5	0	21	28	306	568	[285,550,327,586]	455.207	237.454	242.153	479.607	477.04	490.32	967.36
7	5	0	21	29	770	602	[640,535,964,699]	278.424	229.225	256.652	485.877	2652.85	36584.6	39237.4
7	5	0	21	30	230	607	[217,595,251,628]	823.383	231.592	248.887	480.479	479.365	526.13	1005.5
7	5	0	21	31	170	605	[83,558,226,660]	523.37	211.824	227.63	439.454	443.338	477.522	920.86
7	5	0	21	32	295	609	[243,581,332,640]	328.655	235.359	242.127	477.486	474.957	478.973	953.93
7	5	0	21	33	88	620	[24,582,149,662]	405.176	201.554	205.755	407.309	416.909	429.99	846.899
7	5	0	21	34	200	662	[151,606,250,703]	646.453	222.285	238.391	460.676	464.754	498.456	963.21
7	5	0	21	35	239	633	[226,618,250,643]	352.491	235.427	239.722	475.149	478.049	482.306	960.355
7	5	0	21	36	280	678	[59,630,326,745]	367.415	223.114	238.104	461.218	523.887	491.567	1015.45
7	5	0	21	37	60	675	[5,632,76,691]	455.797	197.865	205.264	403.129	485.888	630.689	1116.58
7	5	0	21	38	34	663	[1,650,47,680]	454.695	193.411	196.962	390.373	384.137	450.638	834.775
7	5	0	21	39	536	597	[312,501,765,706]	324.197	246.836	249.415	496.251	1013.85	522.68	1536.53
7	5	0	21	40	81	768	[1,677,143,854]	300.807	203.307	213.052	416.359	414.486	905.437	1319.92
7	5	0	21	41	618	780	[330,675,871,958]	699.758	245.346	339.826	585.172	1840.4	63937	65777.4
7	5	0	21	42	461	857	[445,806,562,872]	416.031	244.171	249.542	493.713	644.283	1083.78	1728.06
7	5	0	21	43	349	808	[238,721,454,875]	295.881	242.257	246.468	488.725	487.971	508.752	996.723
7	5	0	21	44	169	829	[27,719,223,926]	430.475	216.71	241.307	458.017	522.499	678.723	1201.22
7	5	0	21	45	250	840	[206,744,286,883]	274.015	233.638	232.893	466.531	562.313	791.862	1354.17
7	5	0	21	46	985	841	[960,818,1023,881]	394.275	193.722	194.908	388.63	363.259	409.35	772.609
7	5	0	21	47	210	889	[103,853,251,945]	448.355	219.172	238.196	457.368	410.87	472.654	883.524
7	5	0	21	48	737	834	[633,801,830,890]	323.626	241.577	243.165	484.742	523.348	534.945	1058.29
7	5	0	21	49	413	916	[231,843,470,1011]	751.992	236.554	256.2	492.754	590.983	675.08	1266.06
7	5	0	21	50	831	924	[646,835,954,1023]	274.56	223.884	249.604	473.488	442.866	513.077	955.943
7	5	0	21	51	591	922	[525,869,670,1078]	291.702	240.099	250.319	490.418	610.173	557.043	1167.22
7	5	0	21	52	518	927	[497,905,543,946]	665.676	243.251	253.028	496.279	490.346	502.547	992.893
7	5	0	21	53	197	966	[124,907,361,1012]	293.294	222.217	238.361	460.578	573.947	1472.61	2046.56
7	5	0	21	54	440	1005	[383,930,520,1049]	382.949	231.564	243.335	474.899	460.764	475.875	936.639
7	5	0	21	55	525	1002	[441,930,571,1078]	639.624	232.022	253.597	485.619	449.504	553.336	1002.84
7	5	0	21	56	333	949	[322,941,341,961]	509.469	235.419	240.723	476.142	2727.09	3305.3	6032.39
7	5	0	21	57	686	992	[634,942,741,1045]	267.89	229.947	242.439	472.386	709.219	469	1178.22
7	5	0	21	58	286	1023	[180,936,396,1078]	331.015	220.064	232.604	452.668	541.856	2923.49	3465.35
7	5	0	21	59	525	1055	[482,1031,550,1078]	267.802	225.409	233.019	458.428	417.113	425.425	842.538
7	5	0	21	60	718	1060	[700,1030,744,1078]	594.067	219.814	233.346	453.16	457.724	475.937	933.661
7	5	0	21	61	588	1047	[544,1008,651,1078]	420.73	244.799	558.776	803.575	445.847	590.616	1036.46
7	5	0	21	62	800	1033	[722,986,897,1078]	3842.99	219.462	289.212	508.674	7932.38	35643.2	43575.6
7	5	0	21	63	1040	1067	[1030,1057,1064,1078]	1658.69	171.109	171.109	342.218	5638.4	5638.4	11276.8
7	5	0	21	64	683	1053	[659,1027,704,1078]	511.523	218.279	219.685	437.964	407.544	411.414	818.958
7	5	0	21	65	874	1064	[865,1055,897,1078]	235.537	194.103	194.056	388.159	491.925	485.176	977.101
7	5	0	21	66	394	1052	[324,1026,452,1078]	8300.28	255.668	523	778.668	2547.23	10918.8	13466
7	5	0	21	67	184	392	[177,386,214,423]	287.75	215.28	217.261	432.541	440.043	450.837	890.88
7	5	0	21	68	204	431	[192,420,234,443]	305.705	222.708	222.5	445.208	445.603	443.33	888.933
7	5	0	21	69	115	453	[59,416,232,493]	377.675	210.877	230.495	441.372	483.246	486.42	969.666
7	5	0	21	70	385	451	[129,145,556,618]	309.637	280.232	382.989	663.221	508.644	563.134	1071.78
7	5	0	6	1	666	19	[590,1,718,69]	2187.05	213.692	234.146	447.838	811.016	3516.17	4327.19
7	5	0	6	2	1032	29	[1016,1,1052,49]	416.491	219.76	205.582	425.342	14998.8	6445.23	21444
7	5	0	6	3	723	25	[697,1,781,58]	567.32	205.303	210.537	415.84	379.08	464.272	843.352
7	5	0	6	4	670	50	[629,29,702,85]	397.13	215.441	222.02	437.461	407.164	416.22	823.384
7	5	0	6	5	736	58	[714,45,767,95]	721.765	211.017	212.717	423.734	427.517	582.554	1010.07
7	5	0	6	6	775	59	[753,1,813,86]	1202.62	205.835	215.883	421.718	402.97	646.667	1049.64
7	5	0	6	7	831	49	[763,1,901,102]	2015.68	203.185	231.919	435.104	426.653	3350.13	3776.78
7	5	0	6	8	1046	109	[1013,102,1057,122]	485.117	189.689	190.258	379.947	511.521	477.395	988.916
7	5	0	6	9	1038	124	[1032,115,1048,134]	430.147	189.6	190.734	380.334	386.042	395.517	781.559
7	5	0	6	10	745	155	[675,64,949,232]	567.421	215.029	233.582	448.611	417.661	547.2	964.861
7	5	0	6	11	967	230	[928,200,1000,250]	607.618	197.664	207.844	405.508	377.995	404.915	782.91
7	5	0	6	12	150	216	[78,169,187,281]	431.179	196.547	202.479	399.026	390.035	433.043	823.078
7	5	0	6	13	810	238	[748,178,954,285]	572.383	213.458	233.865	447.323	421.564	486.203	907.767
7	5	0	6	14	146	371	[43,278,198,435]	400.734	201.044	214.742	415.786	422.508	438.055	860.563
7	5	0	6	15	713	452	[449,217,1012,696]	448.52	234.416	243.352	477.768	497.175	473.624	970.799
7	5	0	6	16	49	567	[18,536,71,591]	478.06	191.509	196.799	388.308	391.066	394.462	785.528
7	5	0	6	17	1060	594	[1038,578,1078,620]	2909.51	188.066	187.278	375.344	29568.6	33986.5	63555.1
7	5	0	6	18	169	524	[75,427,279,647]	5112.61	210.558	260.345	470.903	2316.63	46028.9	48345.5
7	5	0	6	19	889	648	[862,621,1004,748]	517.305	213.246	225.175	438.421	411.747	446.721	858.468
7	5	0	6	20	960	664	[909,614,1026,704]	645.833	205.095	230.543	435.638	403.062	485.759	888.821
7	5	0	6	21	821	863	[788,831,869,900]	469.688	224.983	239.57	464.553	989.527	5090.17	6079.7
7	5	0	6	22	576	865	[308,645,922,1078]	575.92	233.981	248.812	482.793	533.354	473.971	1007.33
7	5	0	6	23	140	636	[78,585,255,703]	3215.43	207.872	226.369	434.241	2077.3	21174.2	23251.5
7	5	0	14	1	669	51	[581,1,854,206]	1603.18	240.971	335.118	576.089	6701.11	23848.1	30549.2
7	5	0	14	2	864	23	[847,1,885,35]	436.537	195.259	200.165	395.424	392.575	409.165	801.74
7	5	0	14	3	428	26	[400,1,460,54]	487.571	212.132	219.741	431.873	575.962	556.544	1132.51
7	5	0	14	4	841	42	[817,10,934,93]	444.803	204.68	222.318	426.998	5213.46	18090.8	23304.3
7	5	0	14	5	821	100	[811,90,840,117]	493.039	214.4	218.636	433.036	2830.96	3705.13	6536.09
7	5	0	14	6	279	74	[224,10,320,138]	535.508	205.955	222.371	428.326	392.353	435.427	827.78
7	5	0	14	7	1048	181	[1030,171,1055,191]	467.528	188.216	189.214	377.43	326.489	333.44	659.929
7	5	0	14	8	18	209	[10,199,25,227]	467.868	186.938	186.572	373.51	362.478	358.736	721.214
7	5	0	14	9	367	234	[346,210,391,259]	639.449	234.502	248.275	482.777	497.569	537.536	1035.11
7	5	0	14	10	127	156	[57,83,300,278]	679.097	221.734	234.409	456.143	403.818	494.352	898.17
7	5	0	14	11	195	258	[116,236,265,279]	917.504	210.121	240.033	450.154	429.255	730.496	1159.75
7	5	0	14	12	1072	262	[1068,256,1078,267]	497.723	184.745	184.745	369.49	332.245	332.245	664.49
7	5	0	14	13	985	276	[958,253,1022,294]	449.652	199.035	206.25	405.285	373.735	399.576	773.311
7	5	0	14	14	965	283	[952,274,972,291]	718.128	210.887	215.383	426.27	425.516	449.466	874.982
7	5	0	14	15	288	310	[118,230,333,359]	532.318	218.29	250.48	468.77	441.841	475.975	917.816
7	5	0	14	16	1010	298	[925,265,1041,330]	544.679	199.794	216.829	416.623	386.507	528.833	915.34
7	5	0	14	17	858	322	[741,199,1009,497]	814.812	222.926	243.913	466.839	437.337	497.478	934.815
7	5	0	14	18	341	408	[136,345,446,473]	526.214	228.1	249.714	477.814	459.106	512.327	971.433
7	5	0	14	19	1009	434	[981,402,1050,462]	408.515	195.796	202.021	397.817	372.986	384.227	757.213
7	5	0	14	20	64	409	[40,388,121,441]	441.445	195.104	207.328	402.432	395.05	417.647	812.697
7	5	0	14	21	915	453	[797,414,1011,494]	488.865	214.111	234.966	449.077	423.229	470.911	894.14
7	5	0	14	22	363	466	[330,453,380,480]	441.53	239.121	247.64	486.761	491.163	567.14	1058.3
7	5	0	14	23	85	483	[44,457,118,507]	415.932	196.026	205.459	401.485	398.454	426.459	824.913
7	5	0	14	24	370	490	[322,469,385,505]	510.694	238.635	251.278	489.913	478.148	487.287	965.435
7	5	0	14	25	426	467	[356,412,472,543]	563.978	242.929	251.906	494.835	488.387	525.058	1013.44
7	5	0	14	26	594	400	[351,214,849,612]	4049.61	244.654	268.814	513.468	1085.41	13320.8	14406.2
7	5	0	14	27	925	521	[851,474,1042,575]	602.382	208.422	227.509	435.931	424.394	465.127	889.521
7	5	0	14	28	41	527	[1,491,68,564]	545.5	193.137	204.238	397.375	386.319	413.196	799.515
7	5	0	14	29	202	495	[79,387,371,610]	782.53	218.48	257.535	476.015	441.819	522.211	964.03
7	5	0	14	30	265	594	[94,529,330,657]	794.242	224.254	249.525	473.779	450.544	499.005	949.549
7	5	0	14	31	70	640	[1,584,112,673]	432.808	198.434	210.172	408.606	422.226	611.556	1033.78
7	5	0	14	32	478	640	[308,562,715,699]	533.78	245.605	253.505	499.11	492.111	528.56	1020.67
7	5	0	14	33	819	610	[602,563,908,716]	778.42	237.807	270.341	508.148	471.158	531.5	1002.66
7	5	0	14	34	736	707	[633,651,963,771]	1067.91	235.767	272.681	508.448	530.081	532.52	1062.6
7	5	0	14	35	546	699	[531,679,648,747]	452.766	249.671	252.938	502.609	494.233	507.207	1001.44
7	5	0	14	36	658	740	[637,720,717,768]	490.297	250.088	262.661	512.749	479.082	505.695	984.777
7	5	0	14	37	430	750	[308,648,523,841]	727.611	240.007	262.389	502.396	473.256	525.852	999.108
7	5	0	14	38	578	779	[488,690,785,870]	527.391	247.415	262.112	509.527	482.06	503.783	985.843
7	5	0	14	39	895	742	[872,725,919,774]	482.245	218.357	226.129	444.486	444.236	431.043	875.279
7	5	0	14	40	957	739	[908,700,1031,772]	462.863	206.661	225.4	432.061	403.197	430.074	833.271
7	5	0	14	41	791	753	[740,714,964,850]	499.337	229.443	250.865	480.308	443.987	468.978	912.965
7	5	0	14	42	1061	759	[1051,752,1071,766]	530.396	188.486	189.613	378.099	353.966	352.225	706.191
7	5	0	14	43	951	794	[891,749,1003,831]	550.498	208.409	223.665	432.074	403.509	421.211	824.72
7	5	0	14	44	154	680	[42,614,327,784]	517.624	221.063	250.957	472.02	438.221	485.505	923.726
7	5	0	14	45	322	814	[133,701,371,883]	560.11	233.363	249.585	482.948	478.296	514.401	992.697
7	5	0	14	46	855	827	[779,792,951,888]	512.579	220.308	232.178	452.486	423.676	455.684	879.36
7	5	0	14	47	209	854	[26,729,292,961]	581.982	220.782	237.839	458.621	432.425	514.133	946.558
7	5	0	14	48	82	845	[20,794,149,913]	440.039	204.527	221.674	426.201	380.907	416.644	797.551
7	5	0	14	49	1023	880	[1009,867,1034,893]	462.338	191.596	194.264	385.86	402.167	413.468	815.635
7	5	0	14	50	729	934	[540,810,932,1078]	733.625	230.616	268.591	499.207	439.339	506.875	946.214
7	5	0	14	51	646	889	[640,883,654,897]	781.421	252.38	257.412	509.792	481.211	487.737	968.948
7	5	0	14	52	460	901	[334,810,565,1078]	447.475	235.505	247.508	483.013	485.803	610.619	1096.42
7	5	0	14	53	149	902	[106,874,184,931]	444.181	212.565	221.128	433.693	392.46	407.33	799.79
7	5	0	14	54	73	942	[37,902,134,977]	431.031	198.161	210.907	409.068	363.496	392.62	756.116
7	5	0	14	55	153	950	[71,922,195,1019]	476.84	205.188	230.352	435.54	380.054	467.096	847.15
7	5	0	14	56	319	952	[136,865,401,1078]	499.87	227.297	242.748	470.045	442.903	451.537	894.44
7	5	0	14	57	193	956	[177,926,213,971]	446.627	217.946	227.085	445.031	405.191	423.739	828.93
7	5	0	14	58	244	1032	[167,986,313,1078]	572.281	211.351	226.51	437.861	369.192	408.209	777.401
7	5	0	14	59	470	1034	[421,991,496,1078]	606.455	225.661	241.205	466.866	413.097	441.321	854.418
7	5	0	14	60	775	1051	[739,1021,825,1078]	6968.4	230.742	332.708	563.45	11275.1	62191.7	73466.8
7	5	0	14	61	781	67	[704,1,865,147]	2043.85	237.503	246.099	483.602	13855.3	13952.2	27807.5
7	5	0	14	62	653	163	[609,82,680,203]	2806.81	241.39	270.361	511.751	6714.71	25218	31932.7
7	5	0	14	63	582	85	[533,1,661,226]	2928.04	234.037	281.307	515.344	8331.95	41349.8	49681.8
7	5	0	14	64	450	169	[219,1,600,368]	3900.81	231.849	253.576	485.425	2870.38	21123.5	23993.9
7	5	0	8	1	803	100	[666,1,983,213]	697.817	209.935	226.532	436.467	403.489	445.754	849.243
7	5	0	8	2	194	135	[146,74,265,176]	497.087	198.983	211.33	410.313	378.009	416.835	794.844
7	5	0	8	3	397	254	[124,85,608,456]	775.856	231.266	249.575	480.841	461.73	502.678	964.408
7	5	0	8	4	79	495	[13,437,146,573]	562.545	202.785	217.645	420.43	11115.9	1624.21	12740.1
7	5	0	8	5	210	459	[95,362,439,603]	561.54	225.264	256.12	481.384	483.914	513.04	996.954
7	5	0	8	6	509	495	[376,336,632,602]	735.772	247.548	248.863	496.411	490.662	547.658	1038.32
7	5	0	8	7	228	620	[64,543,321,703]	9096.72	218.621	294.375	512.996	1488.8	37741.7	39230.5
7	5	0	8	8	500	641	[312,580,566,699]	550.148	244.007	256.259	500.266	568.285	553.164	1121.45
7	5	0	8	9	713	676	[688,642,759,702]	705.756	252.116	274.945	527.061	495.665	543.528	1039.19
7	5	0	8	10	698	537	[434,403,899,865]	671.202	247.271	299.067	546.338	538.309	565.908	1104.22
7	5	0	8	11	855	691	[729,602,1017,792]	542.82	221.559	255.263	476.822	440.828	532.599	973.427
7	5	0	8	12	880	782	[800,744,987,829]	517.637	215.323	248.584	463.907	459.642	538.381	998.023
7	5	0	8	13	329	824	[126,659,521,1078]	815.077	233.964	262.747	496.711	538.239	516.723	1054.96
7	5	0	8	14	593	828	[476,714,756,957]	534.189	254.629	291.432	546.061	635.998	744.399	1380.4
7	5	0	8	15	738	876	[623,788,846,979]	8981.2	245.796	330.555	576.351	7117.91	51931.9	59049.8
7	5	0	8	16	818	912	[795,888,849,936]	1144.06	227.612	230.847	458.459	6626.19	7295.4	13921.6
7	5	0	8	17	787	917	[766,902,800,932]	1025.02	232.912	233.66	466.572	9998.32	9413.89	19412.2
7	5	0	8	18	882	953	[845,828,968,992]	1429.88	222.115	235.192	457.307	10592.2	14630	25222.2
7	5	0	8	19	860	1021	[763,871,932,1064]	1462.37	218.623	233.882	452.505	6560.53	12885	19445.5
7	5	0	8	20	755	947	[720,927,801,974]	613.107	235.662	244.007	479.669	7831.76	13868	21699.8
7	5	0	8	21	962	966	[916,923,995,1046]	3932.28	206.658	218.14	424.798	17919.1	38990.8	56909.9
7	5	0	8	22	689	1008	[638,967,733,1078]	2663.43	244.201	267.124	511.325	9900.38	17784.8	27685.2
7	5	0	8	23	582	1009	[498,925,655,1078]	2787.73	237.771	273.945	511.716	4195.82	21237.5	25433.3
7	5	0	8	24	649	1051	[629,1027,662,1066]	3399.68	233.355	248.431	481.786	13259.8	20535.4	33795.2
7	5	0	8	25	762	1040	[686,966,844,1078]	1890.84	229.223	237.667	466.89	11248.1	18305.4	29553.5
7	5	0	8	26	929	918	[892,857,1004,957]	1851.86	213.824	223.371	437.195	16372.6	23587.2	39959.8
7	5	0	20	1	1056	116	[1050,110,1062,124]	533.2	179.044	179.044	358.088	340.911	340.911	681.822
7	5	0	20	2	771	63	[709,1,893,157]	777.217	215.002	292.87	507.872	4298.33	52029.6	56327.9
7	5	0	20	3	797	166	[762,63,889,193]	3954.71	217.362	257.194	474.556	3110.16	28254.4	31364.6
7	5	0	20	4	620	99	[375,1,734,199]	600.683	225.268	242.323	467.591	442.827	582.093	1024.92
7	5	0	20	5	898	119	[793,64,964,216]	3238.78	208.9	232.003	440.903	521.073	2218.78	2739.85
7	5	0	20	6	815	231	[796,192,852,247]	3407.61	226.796	235.126	461.922	830.63	1264.8	2095.43
7	5	0	20	7	892	198	[827,154,962,257]	657.53	211.621	237.949	449.57	455.107	631.028	1086.13
7	5	0	20	8	929	247	[799,210,980,285]	1331.84	212.423	233.197	445.62	753.102	969.643	1722.74
7	5	0	20	9	759	265	[722,242,789,292]	672.921	248.404	274.914	523.318	30119.5	40229.6	70349.1
7	5	0	20	10	813	302	[797,279,834,341]	619.777	237.313	259.809	497.122	8636.06	26312.7	34948.8
7	5	0	20	11	1023	477	[1005,463,1060,501]	566.735	195.131	201.924	397.055	386.594	407.611	794.205
7	5	0	20	12	859	555	[771,516,987,625]	9839.23	231.978	299.624	531.602	10268.1	43493.7	53761.8
7	5	0	20	13	854	629	[810,584,891,675]	608.471	230.629	250.557	481.186	530.807	520.368	1051.18
7	5	0	20	14	189	682	[42,640,249,726]	562.485	213.272	222.455	435.727	425.47	465.522	890.992
7	5	0	20	15	573	717	[299,477,876,1078]	606.665	245.523	268.076	513.599	481.01	524.394	1005.4
7	5	0	20	16	261	858	[117,735,407,1054]	8667.03	230.606	391.957	622.563	1709.13	57716	59425.1
7	5	0	20	17	440	992	[304,811,539,1075]	4197.09	241.207	354.603	595.81	3216.28	40300.9	43517.2
7	5	0	20	18	639	311	[438,123,829,457]	2513.48	244.618	275.532	520.15	4144.42	41927.3	46071.7
7	5	0	20	19	869	315	[797,275,966,402]	7113.58	229.706	350.739	580.445	5968.93	46489.2	52458.1
7	5	0	20	20	822	465	[745,335,962,560]	2820.5	240.519	285.591	526.11	7200.54	20360.9	27561.4
7	5	0	2	1	751	9	[740,1,759,27]	324.64	205.494	207	412.494	353.68	355.748	709.428
7	5	0	2	2	731	15	[703,1,746,30]	505.153	208.329	213.084	421.413	363.91	376.522	740.432
7	5	0	2	3	633	14	[618,1,662,30]	250.036	212.702	215.703	428.405	368.922	387.811	756.733
7	5	0	2	4	418	29	[384,1,465,60]	328.49	210.92	212.255	423.175	377.915	390.275	768.19
7	5	0	2	5	597	20	[572,1,623,44]	266.351	215.423	214.404	429.827	377.105	386.868	763.973
7	5	0	2	6	782	23	[753,1,833,46]	352.709	201.554	205.509	407.063	345.846	378.055	723.901
7	5	0	2	7	639	41	[617,1,681,61]	224.915	215.245	219.382	434.627	381.411	430.655	812.066
7	5	0	2	8	542	30	[462,1,620,90]	475.901	217.752	228.541	446.293	388.699	484.171	872.87
7	5	0	2	9	742	45	[706,23,765,70]	293.514	210.842	210.739	421.581	370.115	386.92	757.035
7	5	0	2	10	265	57	[207,1,289,83]	557.248	202.038	222.267	424.305	360.434	384.416	744.85
7	5	0	2	11	682	45	[653,1,832,96]	343.788	213.18	220.747	433.927	398.749	968.559	1367.31
7	5	0	2	12	959	77	[946,52,980,104]	315.642	189.552	186.27	375.822	319.326	326.027	645.353
7	5	0	2	13	189	51	[142,1,251,107]	526.31	198.672	213.143	411.815	347.242	375.206	722.448
7	5	0	2	14	344	49	[243,1,445,139]	501.585	211.243	226	437.243	384.286	426.239	810.525
7	5	0	2	15	213	104	[200,94,231,114]	396.75	201.359	204.023	405.382	368.94	379.636	748.576
7	5	0	2	16	1027	111	[1021,105,1033,118]	279.302	181.207	181.207	362.414	310.017	310.017	620.034
7	5	0	2	17	587	101	[555,64,612,133]	414.352	226.716	233.398	460.114	421.144	444.5	865.644
7	5	0	2	18	205	155	[126,62,260,200]	555.513	203.753	229.841	433.594	375.3	395.451	770.751
7	5	0	2	19	309	110	[271,51,337,144]	625.419	212.313	229.619	441.932	392.772	427.124	819.896
7	5	0	2	20	362	127	[323,99,395,178]	866.768	221.389	233.665	455.054	422.485	443.552	866.037
7	5	0	2	21	547	140	[520,54,600,176]	283.422	227.411	230.078	457.489	426.169	433.797	859.966
7	5	0	2	22	103	108	[78,76,140,154]	606.701	192.418	195.748	388.166	343.081	370.682	713.763
7	5	0	2	23	881	115	[824,14,974,180]	245.484	200.07	210.462	410.532	352.381	377.473	729.854
7	5	0	2	24	153	159	[139,150,168,176]	560.744	199.533	210.378	409.911	380.773	403.722	784.495
7	5	0	2	25	284	159	[221,81,333,210]	292.252	214.594	218.963	433.557	469.843	973.28	1443.12
7	5	0	2	26	107	164	[78,147,132,177]	462.425	195.491	201.246	396.737	397.549	475.904	873.453
7	5	0	2	27	119	190	[90,155,155,210]	553.397	198.138	207.102	405.24	383.416	405.815	789.231
7	5	0	2	28	475	120	[405,21,577,203]	360.768	225.916	232.155	458.071	424.364	454.652	879.016
7	5	0	2	29	923	180	[869,147,996,211]	304.43	198.992	203.83	402.822	355.683	383.74	739.423
7	5	0	2	30	155	211	[100,193,179,234]	453.838	204.38	221.387	425.767	784.747	1422.8	2207.55
7	5	0	2	31	189	207	[163,193,213,244]	491.92	206.972	213.845	420.817	464.191	484.508	948.699
7	5	0	2	32	123	232	[104,220,169,252]	924.871	205.978	223.76	429.738	2474.18	3714.53	6188.71
7	5	0	2	33	150	276	[109,244,176,316]	500.987	209.678	220.226	429.904	2718.16	6942.84	9661
7	5	0	2	34	62	271	[43,242,80,295]	397.432	190.916	186.808	377.724	362.088	361.601	723.689
7	5	0	2	35	105	267	[55,243,126,317]	293.509	195.171	200.491	395.662	395.857	428.972	824.829
7	5	0	2	36	186	309	[118,264,231,362]	317.971	216.14	222.569	438.709	431.46	451.127	882.587
7	5	0	2	37	37	347	[18,324,58,359]	297.5	191.367	196.068	387.435	359.903	369.17	729.073
7	5	0	2	38	101	331	[60,298,208,376]	248.565	204.894	221.048	425.942	406.963	547.958	954.921
7	5	0	2	39	115	388	[70,357,219,437]	265.85	208.086	220.14	428.226	416.272	635.332	1051.6
7	5	0	2	40	935	364	[822,253,1034,463]	379.617	208.85	222.247	431.097	391.426	443.235	834.661
7	5	0	2	41	1040	419	[1028,405,1052,427]	184.835	188.458	183.549	372.007	336.533	336.451	672.984
7	5	0	2	42	154	467	[60,400,249,538]	346.142	211.544	226.085	437.629	414.203	439.892	854.095
7	5	0	2	43	277	431	[179,349,333,537]	274.221	227.2	232.53	459.73	486.998	456.984	943.982
7	5	0	2	44	984	494	[913,435,1051,583]	337.094	204.723	211.365	416.088	375.119	404.835	779.954
7	5	0	2	45	932	554	[899,525,1008,612]	235.262	209.188	216.541	425.729	390.234	403.779	794.013
7	5	0	2	46	137	555	[39,516,208,594]	335.617	205.053	215.228	420.281	400.276	418.275	818.551
7	5	0	2	47	1055	589	[1050,584,1062,595]	248.59	180.16	180.16	360.32	338.93	338.93	677.86
[truncated: 72,031 more rows]
