# Supplementary material for: Comparative Analysis of Co-Cultured Amniotic Cell-Conditioned Media with Cell-Free Amniotic Fluid Reveals Differential Effects on Epithelial–Mesenchymal Transition and Myofibroblast Activation
Source: Biomedicines. 2022 Sep 5;10(9):2189. doi: 10.3390/biomedicines10092189 (PMC9495976; doi:10.3390/biomedicines10092189)
Supplement: Supplementary file 1 [file biomedicines-10-02189-s001.zip › Table S3.xlsx]

## Sheet: Sheet1
AF_fair_v1, Samples report created on 01/29/2020
Experiment: AF_fair_v1
	Peak List Generator: unknown
		Version: unknown
		Charge States Calculated: unknown
		Deisotoped: unknown
		Textual Annotation: unknown
	Database Set: 10 Databases
		Database Name: Human_06112019_reviewed.fasta
			Version: unknown
			Taxonomy: All Entries
			Number of Proteins: 20369
		Database Name: a reverse concatenated subset of the Human_06112019_reviewed database
			Version: unknown
			Taxonomy: All Entries
			Number of Proteins: 13698
		Database Name: a reverse concatenated subset of the Human_06112019_reviewed database
			Version: unknown
			Taxonomy: All Entries
			Number of Proteins: 14072
		Database Name: a reverse concatenated subset of the Human_06112019_reviewed database
			Version: unknown
			Taxonomy: All Entries
			Number of Proteins: 15112
		Database Name: a reverse concatenated subset of the Human_06112019_reviewed database
			Version: unknown
			Taxonomy: All Entries
			Number of Proteins: 15450
		Database Name: a reverse concatenated subset of the Human_06112019_reviewed database
			Version: unknown
			Taxonomy: All Entries
			Number of Proteins: 15636
		Database Name: a reverse concatenated subset of the Human_06112019_reviewed database
			Version: unknown
			Taxonomy: All Entries
			Number of Proteins: 15640
		Database Name: a reverse concatenated subset of the Human_06112019_reviewed database
			Version: unknown
			Taxonomy: All Entries
			Number of Proteins: 15660
		Database Name: a reverse concatenated subset of the Human_06112019_reviewed database
			Version: unknown
			Taxonomy: All Entries
			Number of Proteins: 16516
		Database Name: a reverse concatenated subset of the Human_06112019_reviewed database
			Version: unknown
			Taxonomy: All Entries
			Number of Proteins: 16728
		Does database contain common contaminants?: unknown
	Search Engine Set: 2 Search Engines
		Search Engine: Sequest
			Version: IseNode in Proteome Discoverer 2.3.0.523
			Samples: All Samples
			Fragment Tolerance: 0.60 Da (Monoisotopic)
			Parent Tolerance: 10.0 PPM (Monoisotopic)
			Fixed Modifications: +57 on C (Carbamidomethyl)
			Variable Modifications: -131 on M (Met-loss), +1 on N (Deamidated), +16 on M (Oxidation), +42 on Peptide N-Terminal (Acetyl)
			Database: Human_06112019_reviewed.fasta (unknown version, 20369 entries)
			Digestion Enzyme: Trypsin
			Max Missed Cleavages: 2
			Probability Model:
				07162019_Fair_Exosome_1-(1): LFDR Model, Classifier data: Bayes, Good (50%) m:6.21/s:1.35 m:0.442/s:0.0992 m:3.85/s:0.927 m:NA m:NA m:NA, Bad (50%) m:1.64/s:0.861 m:0.110/s:0.0956 m:2.32/s:0.539 m:NA m:NA m:NA [all charge states]
				07162019_Fair_Exosome_2-(1): LFDR Model, Classifier data: Bayes, Good (50%) m:6.24/s:1.35 m:0.447/s:0.100 m:3.84/s:0.953 m:NA m:NA m:NA, Bad (50%) m:1.59/s:0.875 m:0.110/s:0.100 m:2.28/s:0.548 m:NA m:NA m:NA [all charge states]
				07162019_Fair_Exosome_3-(1): LFDR Model, Classifier data: Bayes, Good (50%) m:6.30/s:1.36 m:0.448/s:0.1000 m:3.90/s:0.964 m:NA m:NA m:NA, Bad (50%) m:1.66/s:0.868 m:0.115/s:0.0989 m:2.30/s:0.547 m:NA m:NA m:NA [all charge states]
				07162019_Fair_Exosome_4-(1): LFDR Model, Classifier data: Bayes, Good (50%) m:6.39/s:1.33 m:0.453/s:0.0969 m:3.96/s:0.965 m:NA m:NA m:NA, Bad (50%) m:1.70/s:0.879 m:0.118/s:0.101 m:2.32/s:0.546 m:NA m:NA m:NA [all charge states]
				07162019_Fair_Exosome_5-(1): LFDR Model, Classifier data: Bayes, Good (50%) m:6.29/s:1.37 m:0.448/s:0.101 m:3.89/s:0.950 m:NA m:NA m:NA, Bad (50%) m:1.71/s:0.857 m:0.117/s:0.0969 m:2.33/s:0.545 m:NA m:NA m:NA [all charge states]
				07162019_Fair_Exosome_6-(1): LFDR Model, Classifier data: Bayes, Good (50%) m:6.41/s:1.36 m:0.454/s:0.0988 m:3.98/s:0.978 m:NA m:NA m:NA, Bad (50%) m:1.73/s:0.871 m:0.118/s:0.0985 m:2.34/s:0.554 m:NA m:NA m:NA [all charge states]
				07162019_Fair_Exosome_7-(1): LFDR Model, Classifier data: Bayes, Good (50%) m:5.83/s:1.21 m:0.424/s:0.0942 m:3.53/s:0.840 m:NA m:NA m:NA, Bad (50%) m:1.75/s:0.869 m:0.138/s:0.119 m:2.10/s:0.559 m:NA m:NA m:NA [all charge states]
				07162019_Fair_Exosome_8-(1): LFDR Model, Classifier data: Bayes, Good (51%) m:5.91/s:1.44 m:0.430/s:0.109 m:3.71/s:0.966 m:NA m:NA m:NA, Bad (49%) m:0.915/s:1.35 m:0.0930/s:0.101 m:1.94/s:0.693 m:NA m:NA m:NA [all charge states]
				07162019_Fair_Exosome_9-(1): LFDR Model, Classifier data: Bayes, Good (50%) m:5.66/s:1.27 m:0.423/s:0.107 m:3.45/s:0.817 m:NA m:NA m:NA, Bad (50%) m:1.37/s:0.923 m:0.115/s:0.112 m:2.00/s:0.549 m:NA m:NA m:NA [all charge states]
		Search Engine: X! Tandem
			Version: X! Tandem Alanine (2017.2.1.4)
			Samples: All Samples
			Fragment Tolerance: 0.60 Da (Monoisotopic)
			Parent Tolerance: 10.0 PPM (Monoisotopic)
			Fixed Modifications: +57 on C (Carbamidomethyl)
			Variable Modifications: -131 on M (Met-loss), -18 on Peptide N-Terminal (Glu->pyro-Glu), -17 on Peptide N-Terminal (Ammonia-loss), -17 on Peptide N-Terminal (Gln->pyro-Glu), +1 on N (Deamidated), +16 on M (Oxidation), +42 on Peptide N-Terminal (Acetyl)
			Database: a reverse concatenated subset of the Human_06112019_reviewed database (unknown version, 13698 entries) (07162019_Fair_Exosome_9-(1)), a reverse concatenated subset of the Human_06112019_reviewed database (unknown version, 14072 entries) (07162019_Fair_Exosome_7-(1)), a reverse concatenated subset of the Human_06112019_reviewed database (unknown version, 15112 entries) (07162019_Fair_Exo…
			Digestion Enzyme: Trypsin (07162019_Fair_Exosome_9-(1)), Trypsin (07162019_Fair_Exosome_7-(1)), Trypsin (07162019_Fair_Exosome_1-(1)), Trypsin (07162019_Fair_Exosome_3-(1)), Trypsin (07162019_Fair_Exosome_5-(1)), Trypsin (07162019_Fair_Exosome_2-(1)), Trypsin (07162019_Fair_Exosome_6-(1)), Trypsin (07162019_Fair_Exosome_8-(1)), Trypsin (07162019_Fair_Exosome_4-(1))
			Max Missed Cleavages: 2 (07162019_Fair_Exosome_9-(1)), 2 (07162019_Fair_Exosome_7-(1)), 2 (07162019_Fair_Exosome_1-(1)), 2 (07162019_Fair_Exosome_3-(1)), 2 (07162019_Fair_Exosome_5-(1)), 2 (07162019_Fair_Exosome_2-(1)), 2 (07162019_Fair_Exosome_6-(1)), 2 (07162019_Fair_Exosome_8-(1)), 2 (07162019_Fair_Exosome_4-(1))
			Probability Model:
				07162019_Fair_Exosome_1-(1): LFDR Model, Classifier data: Bayes, Good (50%) m:6.82/s:1.77 m:58.2/s:11.1 m:6.82/s:1.77 m:0.434/s:0.180 m:0.543/s:0.147, Bad (50%) m:1.65/s:1.79 m:40.5/s:8.19 m:1.65/s:1.79 m:0.125/s:0.0840 m:0.378/s:0.125 [all charge states]
				07162019_Fair_Exosome_2-(1): LFDR Model, Classifier data: Bayes, Good (50%) m:6.28/s:1.95 m:56.3/s:11.2 m:6.28/s:1.95 m:0.433/s:0.166 m:0.534/s:0.140, Bad (50%) m:1.31/s:1.58 m:39.0/s:8.28 m:1.31/s:1.58 m:0.113/s:0.0801 m:0.378/s:0.123 [all charge states]
				07162019_Fair_Exosome_3-(1): LFDR Model, Classifier data: Bayes, Good (50%) m:6.12/s:2.05 m:56.5/s:11.1 m:6.12/s:2.05 m:0.436/s:0.153 m:0.545/s:0.139, Bad (50%) m:1.25/s:1.55 m:39.3/s:8.20 m:1.25/s:1.55 m:0.114/s:0.0787 m:0.379/s:0.123 [all charge states]
				07162019_Fair_Exosome_4-(1): LFDR Model, Classifier data: Bayes, Good (50%) m:6.26/s:2.00 m:56.6/s:11.4 m:6.26/s:2.00 m:0.427/s:0.167 m:0.537/s:0.145, Bad (50%) m:1.30/s:1.63 m:39.8/s:8.21 m:1.30/s:1.63 m:0.113/s:0.0778 m:0.378/s:0.123 [all charge states]
				07162019_Fair_Exosome_5-(1): LFDR Model, Classifier data: Bayes, Good (50%) m:6.65/s:1.98 m:58.1/s:11.6 m:6.65/s:1.98 m:0.439/s:0.166 m:0.553/s:0.147, Bad (50%) m:1.43/s:1.59 m:40.5/s:8.13 m:1.43/s:1.59 m:0.119/s:0.0788 m:0.389/s:0.126 [all charge states]
				07162019_Fair_Exosome_6-(1): LFDR Model, Classifier data: Bayes, Good (50%) m:6.20/s:2.05 m:56.9/s:11.4 m:6.20/s:2.05 m:0.427/s:0.158 m:0.548/s:0.143, Bad (50%) m:1.21/s:1.46 m:39.7/s:8.04 m:1.21/s:1.46 m:0.114/s:0.0757 m:0.382/s:0.127 [all charge states]
				07162019_Fair_Exosome_7-(1): LFDR Model, Classifier data: Bayes, Good (50%) m:6.64/s:1.84 m:52.8/s:11.7 m:6.64/s:1.84 m:0.332/s:0.222 m:0.495/s:0.167, Bad (50%) m:3.38/s:2.54 m:40.6/s:8.36 m:3.38/s:2.54 m:0.122/s:0.106 m:0.380/s:0.118 [all charge states]
				07162019_Fair_Exosome_8-(1): LFDR Model, Classifier data: Bayes, Good (50%) m:5.41/s:1.96 m:53.3/s:10.4 m:5.41/s:1.96 m:0.422/s:0.145 m:0.518/s:0.132, Bad (50%) m:0.791/s:1.49 m:36.6/s:8.01 m:0.791/s:1.49 m:0.0937/s:0.0658 m:0.332/s:0.126 [all charge states]
				07162019_Fair_Exosome_9-(1): LFDR Model, Classifier data: Bayes, Good (50%) m:5.04/s:1.71 m:49.3/s:8.97 m:5.04/s:1.71 m:0.405/s:0.164 m:0.510/s:0.144, Bad (50%) m:1.62/s:2.00 m:37.6/s:7.57 m:1.62/s:2.00 m:0.115/s:0.0785 m:0.363/s:0.141 [all charge states]
	Scaffold: Version: Scaffold_4.8.7
		Modification Metadata Set: 2334 modifications
			Source: C:\Program Files\Scaffold 4\parameters\unimod.xml
			Comment:
		Protein Grouping Strategy: Experiment-wide grouping with protein cluster analysis
		Peptide Thresholds: 95.0% minimum
		Protein Thresholds: 99.0% minimum and 2 peptides minimum
		Peptide FDR: 0.3% (Decoy)
		Protein FDR: 8.2% (Decoy)
		GO Annotation Source(s):
		Alternate ID Source(s): FASTA:UniProt/Swiss-Prot (UniProtKB)
									1	2	3	1	2	3	1	2	3
									Quantitative Value (Normalized Average TIC)	Quantitative Value (Normalized Average TIC)	Quantitative Value (Normalized Average TIC)	Quantitative Value (Normalized Average TIC)	Quantitative Value (Normalized Average TIC)	Quantitative Value (Normalized Average TIC)	Quantitative Value (Normalized Average TIC)	Quantitative Value (Normalized Average TIC)	Quantitative Value (Normalized Average TIC)												Sample2
AF_fair_v1									amnio	amnio	amnio	depleted	depleted	depleted	exosome	exosome	exosome
									AF_donor1	AF_donor2	AF_donor3	EV- AF_donor1	EV- AF_donor 2	EV- AF_donor3	AF EVs_donor1	AF EVs_donor2	AF EVs_donor3
#	Visible?	Starred?	Identified Proteins (763)	Accession Number	Alternate ID	Molecular Weight	Protein Grouping Ambiguity	Taxonomy	07162019_Fair_Exosome_1-(1)	07162019_Fair_Exosome_2-(1)	07162019_Fair_Exosome_3-(1)	07162019_Fair_Exosome_4-(1)	07162019_Fair_Exosome_5-(1)	07162019_Fair_Exosome_6-(1)	07162019_Fair_Exosome_7-(1)	07162019_Fair_Exosome_8-(1)	07162019_Fair_Exosome_9-(1)
1	TRUE	Empty	Mucin-7 OS=Homo sapiens OX=9606 GN=MUC7 PE=1 SV=2	MUC7_HUMAN	MUC7	39 kDa		unknown	0	0	0	0	0	0	0	81444	0
2	TRUE	Empty	C-reactive protein OS=Homo sapiens OX=9606 GN=CRP PE=1 SV=1	CRP_HUMAN	CRP	25 kDa		unknown	0	0	0	0	0	0	0	63158	55993
9.1	TRUE	Empty	Immunoglobulin heavy constant gamma 3 OS=Homo sapiens OX=9606 GN=IGHG3 PE=1 SV=2	IGHG3_HUMAN	IGHG3	41 kDa	TRUE	unknown	55275	71791	61696	58391	58384	62166	0	59631	0										245								223
3	TRUE	Empty	Galectin-3 OS=Homo sapiens OX=9606 GN=LGALS3 PE=1 SV=5	LEG3_HUMAN	LGALS3	26 kDa		unknown	0	0	0	0	0	0	0	58251	0
4	TRUE	Empty	G-protein coupled receptor family C group 5 member B OS=Homo sapiens OX=9606 GN=GPRC5B PE=2 SV=2	GPC5B_HUMAN	GPRC5B	45 kDa		unknown	0	0	0	0	0	0	16743	56190	26246
5	TRUE	Empty	Protein S100-A4 OS=Homo sapiens OX=9606 GN=S100A4 PE=1 SV=1	S10A4_HUMAN	S100A4	12 kDa		unknown	0	0	0	0	0	0	0	52560	0
9.2	TRUE	Empty	Immunoglobulin gamma-1 heavy chain OS=Homo sapiens OX=9606 PE=1 SV=2	IGG1_HUMAN		49 kDa	TRUE	unknown	51062	60314	51580	56045	53779	48419	19500	52183	42392
6	TRUE	Empty	Histone H4 OS=Homo sapiens OX=9606 GN=HIST1H4A PE=1 SV=2	H4_HUMAN	HIST1H4A	11 kDa		unknown	0	0	0	0	0	0	22498	51917	39459
7	TRUE	Empty	Serpin B12 OS=Homo sapiens OX=9606 GN=SERPINB12 PE=1 SV=1	SPB12_HUMAN	SERPINB12	46 kDa	TRUE	unknown	11804	21631	19966	11713	0	0	29296	50928	0
8	TRUE	Empty	Hemoglobin subunit alpha OS=Homo sapiens OX=9606 GN=HBA1 PE=1 SV=2	HBA_HUMAN	HBA1	15 kDa		unknown	37199	43738	0	37087	42097	0	0	49255	0
9	TRUE	Empty	Cluster of Immunoglobulin gamma-1 heavy chain OS=Homo sapiens OX=9606 PE=1 SV=2 (IGG1_HUMAN)	IGG1_HUMAN [3]		49 kDa	TRUE	unknown	48840	56639	51371	52216	52642	49391	17526	49185	36631
10	TRUE	Empty	Annexin A1 OS=Homo sapiens OX=9606 GN=ANXA1 PE=1 SV=2	ANXA1_HUMAN	ANXA1	39 kDa		unknown	17303	19027	15580	13268	17981	11693	23037	48786	33727
11	TRUE	Empty	Lumican OS=Homo sapiens OX=9606 GN=LUM PE=1 SV=2	LUM_HUMAN	LUM	38 kDa		unknown	25693	33357	20316	23474	25949	18507	19550	48577	17161
12	TRUE	Empty	Uromodulin OS=Homo sapiens OX=9606 GN=UMOD PE=1 SV=1	UROM_HUMAN	UMOD	70 kDa		unknown	9835.1	36447	30115	9280.1	10295	0	0	48325	10987
13.1	TRUE	Empty	Annexin A2 OS=Homo sapiens OX=9606 GN=ANXA2 PE=1 SV=2	ANXA2_HUMAN	ANXA2	39 kDa	TRUE	unknown	20651	27767	21028	16912	19824	0	24692	47638	34324
13	TRUE	Empty	Cluster of Annexin A2 OS=Homo sapiens OX=9606 GN=ANXA2 PE=1 SV=2 (ANXA2_HUMAN)	ANXA2_HUMAN	ANXA2	39 kDa	TRUE	unknown	20651	27767	21028	16912	19824	0	24692	47637	34324
9.3	TRUE	Empty	Immunoglobulin heavy constant gamma 2 OS=Homo sapiens OX=9606 GN=IGHG2 PE=1 SV=2	IGHG2_HUMAN	IGHG2	36 kDa	TRUE	unknown	52415	55404	54826	51152	58130	55407	15469	47364	34441
51.1	TRUE	Empty	Keratin, type II cytoskeletal 78 OS=Homo sapiens OX=9606 GN=KRT78 PE=1 SV=2	K2C78_HUMAN	KRT78	57 kDa	TRUE	unknown	0	0	0	71092	0	0	47831	46691	0
14	TRUE	Empty	Aquaporin-5 OS=Homo sapiens OX=9606 GN=AQP5 PE=1 SV=1	AQP5_HUMAN	AQP5	28 kDa		unknown	0	0	0	0	0	0	0	46667	0
15	TRUE	Empty	Carboxypeptidase B2 OS=Homo sapiens OX=9606 GN=CPB2 PE=1 SV=2	CBPB2_HUMAN	CPB2	48 kDa		unknown	0	25573	25494	0	25086	0	0	46349	0
25.1	TRUE	Empty	HLA class II histocompatibility antigen, DRB1-4 beta chain OS=Homo sapiens OX=9606 GN=HLA-DRB1 PE=1 SV=1	2B14_HUMAN	HLA-DRB1	30 kDa	TRUE	unknown	0	0	0	0	0	0	0	45105	0
16	TRUE	Empty	Apolipoprotein A-I OS=Homo sapiens OX=9606 GN=APOA1 PE=1 SV=1	APOA1_HUMAN	APOA1	31 kDa		unknown	33306	38243	31849	31698	29745	27058	22388	44785	27393														574
17	TRUE	Empty	Cluster of Ras-related C3 botulinum toxin substrate 1 OS=Homo sapiens OX=9606 GN=RAC1 PE=1 SV=1 (RAC1_HUMAN)	RAC1_HUMAN	RAC1	21 kDa	TRUE	unknown	0	0	0	0	0	0	21689	44048	0
17.1	TRUE	Empty	Ras-related C3 botulinum toxin substrate 1 OS=Homo sapiens OX=9606 GN=RAC1 PE=1 SV=1	RAC1_HUMAN	RAC1	21 kDa	TRUE	unknown	0	0	0	0	0	0	21689	44048	0
51.2	TRUE	Empty	Keratin, type II cytoskeletal 8 OS=Homo sapiens OX=9606 GN=KRT8 PE=1 SV=7	K2C8_HUMAN	KRT8	54 kDa	TRUE	unknown	0	0	0	0	0	0	0	42179	35870
45.1	TRUE	Empty	Elongation factor 1-alpha 2 OS=Homo sapiens OX=9606 GN=EEF1A2 PE=1 SV=1	EF1A2_HUMAN	EEF1A2	50 kDa	TRUE	unknown	0	0	0	0	0	0	0	41862	0
18	TRUE	Empty	Annexin A3 OS=Homo sapiens OX=9606 GN=ANXA3 PE=1 SV=3	ANXA3_HUMAN	ANXA3	36 kDa		unknown	0	0	0	0	0	0	13180	41712	26818
19	TRUE	Empty	Pulmonary surfactant-associated protein B OS=Homo sapiens OX=9606 GN=SFTPB PE=1 SV=3	PSPB_HUMAN	SFTPB	42 kDa		unknown	21934	27990	25374	14443	28960	12572	21952	41670	54246
20	TRUE	Empty	Bone marrow proteoglycan OS=Homo sapiens OX=9606 GN=PRG2 PE=1 SV=2	PRG2_HUMAN	PRG2	25 kDa		unknown	49328	52906	47485	44225	54942	47892	11189	41173	25780
58.1	TRUE	Empty	Beta-actin-like protein 2 OS=Homo sapiens OX=9606 GN=ACTBL2 PE=1 SV=2	ACTBL_HUMAN	ACTBL2	42 kDa	TRUE	unknown	0	0	0	29209	0	0	0	40909	0
21	TRUE	Empty	Immunoglobulin alpha-2 heavy chain OS=Homo sapiens OX=9606 PE=1 SV=2	IGA2_HUMAN		49 kDa	TRUE	unknown	32141	35760	27599	27035	32226	32438	0	40790	0
22	TRUE	Empty	Tumor susceptibility gene 101 protein OS=Homo sapiens OX=9606 GN=TSG101 PE=1 SV=2	TS101_HUMAN	TSG101	44 kDa		unknown	0	0	0	0	0	0	17566	40640	0
23	TRUE	Empty	Peroxiredoxin-1 OS=Homo sapiens OX=9606 GN=PRDX1 PE=1 SV=1	PRDX1_HUMAN	PRDX1	22 kDa	TRUE	unknown	0	26507	0	0	0	0	19167	40461	0
24	TRUE	Empty	Ubiquitin-60S ribosomal protein L40 OS=Homo sapiens OX=9606 GN=UBA52 PE=1 SV=2	RL40_HUMAN	UBA52	15 kDa		unknown	0	0	0	0	0	0	21184	40298	32338
25.2	TRUE	Empty	HLA class II histocompatibility antigen, DRB1-8 beta chain OS=Homo sapiens OX=9606 GN=HLA-DRB1 PE=1 SV=2	2B18_HUMAN	HLA-DRB1	30 kDa	TRUE	unknown	0	0	0	0	0	0	0	39871	0
25	TRUE	Empty	Cluster of HLA class II histocompatibility antigen, DRB1-4 beta chain OS=Homo sapiens OX=9606 GN=HLA-DRB1 PE=1 SV=1 (2B14_HUMAN)	2B14_HUMAN [2]	HLA-DRB1	30 kDa	TRUE	unknown	0	0	0	0	0	0	0	39637	0
26	TRUE	Empty	Retinoic acid-induced protein 3 OS=Homo sapiens OX=9606 GN=GPRC5A PE=1 SV=2	RAI3_HUMAN	GPRC5A	40 kDa		unknown	0	0	0	14207	0	0	20188	39615	38091
27	TRUE	Empty	Vitronectin OS=Homo sapiens OX=9606 GN=VTN PE=1 SV=1	VTNC_HUMAN	VTN	54 kDa		unknown	26513	25925	32949	23752	17931	22988	28711	39559	31298
28	TRUE	Empty	Immunoglobulin heavy constant gamma 4 OS=Homo sapiens OX=9606 GN=IGHG4 PE=1 SV=1	IGHG4_HUMAN	IGHG4	36 kDa	TRUE	unknown	36086	42954	40867	39322	36156	36502	0	39444	0
29	TRUE	Empty	F-actin-capping protein subunit alpha-2 OS=Homo sapiens OX=9606 GN=CAPZA2 PE=1 SV=3	CAZA2_HUMAN	CAPZA2	33 kDa	TRUE	unknown	0	0	0	0	0	0	0	39284	0
30	TRUE	Empty	Protein MAL2 OS=Homo sapiens OX=9606 GN=MAL2 PE=1 SV=1	MAL2_HUMAN	MAL2	19 kDa		unknown	0	0	0	0	0	0	0	39212	0
31	TRUE	Empty	ADP-ribosylation factor 6 OS=Homo sapiens OX=9606 GN=ARF6 PE=1 SV=2	ARF6_HUMAN	ARF6	20 kDa		unknown	0	0	0	0	0	0	0	39041	0
161.1	TRUE	Empty	Immunoglobulin heavy variable 3-21 OS=Homo sapiens OX=9606 GN=IGHV3-21 PE=1 SV=1	HV321_HUMAN	IGHV3-21	13 kDa	TRUE	unknown	43442	40933	22968	31394	47679	36392	0	37936	0
51.3	TRUE	Empty	Keratin, type II cytoskeletal 1 OS=Homo sapiens OX=9606 GN=KRT1 PE=1 SV=6	K2C1_HUMAN	KRT1	66 kDa	TRUE	unknown	31553	33585	36589	37318	31909	32264	34827	37018	28600
51.4	TRUE	Empty	Keratin, type II cytoskeletal 6B OS=Homo sapiens OX=9606 GN=KRT6B PE=1 SV=5	K2C6B_HUMAN	KRT6B	60 kDa	TRUE	unknown	37488	0	45951	42122	0	0	56054	36894	0
32	TRUE	Empty	Programmed cell death protein 10 OS=Homo sapiens OX=9606 GN=PDCD10 PE=1 SV=1	PDC10_HUMAN	PDCD10	25 kDa		unknown	0	0	0	0	0	0	0	36783	0
33	TRUE	Empty	Complement factor D OS=Homo sapiens OX=9606 GN=CFD PE=1 SV=5	CFAD_HUMAN	CFD	27 kDa		unknown	28806	47390	30547	29530	54104	43504	0	36431	0
45.2	TRUE	Empty	Elongation factor 1-alpha 1 OS=Homo sapiens OX=9606 GN=EEF1A1 PE=1 SV=1	EF1A1_HUMAN	EEF1A1	50 kDa	TRUE	unknown	0	0	0	0	0	0	25295	35838	0
34	TRUE	Empty	Endoplasmin OS=Homo sapiens OX=9606 GN=HSP90B1 PE=1 SV=1	ENPL_HUMAN	HSP90B1	92 kDa	TRUE	unknown	0	0	10767	0	0	0	0	35580	0
35	TRUE	Empty	Plastin-3 OS=Homo sapiens OX=9606 GN=PLS3 PE=1 SV=4	PLST_HUMAN	PLS3	71 kDa	TRUE	unknown	0	0	0	0	0	0	0	35373	0
36	TRUE	Empty	Heparin cofactor 2 OS=Homo sapiens OX=9606 GN=SERPIND1 PE=1 SV=3	HEP2_HUMAN	SERPIND1	57 kDa		unknown	18483	14295	19601	8837.5	24189	23402	0	35371	10549
37	TRUE	Empty	Dipeptidyl peptidase 4 OS=Homo sapiens OX=9606 GN=DPP4 PE=1 SV=2	DPP4_HUMAN	DPP4	88 kDa		unknown	0	0	0	0	0	0	0	35212	20363
134.1	TRUE	Empty	Keratin, type I cytoskeletal 13 OS=Homo sapiens OX=9606 GN=KRT13 PE=1 SV=4	K1C13_HUMAN	KRT13	50 kDa	TRUE	unknown	38273	0	0	0	0	0	0	35189	0
38	TRUE	Empty	Acid ceramidase OS=Homo sapiens OX=9606 GN=ASAH1 PE=1 SV=5	ASAH1_HUMAN	ASAH1	45 kDa		unknown	0	0	0	0	0	0	0	35165	0
39	TRUE	Empty	Alpha-1-antitrypsin OS=Homo sapiens OX=9606 GN=SERPINA1 PE=1 SV=3	A1AT_HUMAN	SERPINA1	47 kDa	TRUE	unknown	34632	39640	40572	35034	40357	36564	16445	35097	28309
40	TRUE	Empty	Choline transporter-like protein 2 OS=Homo sapiens OX=9606 GN=SLC44A2 PE=1 SV=3	CTL2_HUMAN	SLC44A2	80 kDa		unknown	0	0	0	0	0	0	0	35048	0
41	TRUE	Empty	Napsin-A OS=Homo sapiens OX=9606 GN=NAPSA PE=1 SV=1	NAPSA_HUMAN	NAPSA	45 kDa		unknown	0	0	0	0	0	0	28401	34497	27318
51.5	TRUE	Empty	Keratin, type II cytoskeletal 6A OS=Homo sapiens OX=9606 GN=KRT6A PE=1 SV=3	K2C6A_HUMAN	KRT6A	60 kDa	TRUE	unknown	30013	0	37720	35415	0	0	52658	33871	29962
42	TRUE	Empty	Programmed cell death protein 6 OS=Homo sapiens OX=9606 GN=PDCD6 PE=1 SV=1	PDCD6_HUMAN	PDCD6	22 kDa		unknown	0	0	0	0	0	0	0	33808	0
43	TRUE	Empty	Cluster of Hemoglobin subunit beta OS=Homo sapiens OX=9606 GN=HBB PE=1 SV=2 (HBB_HUMAN)	HBB_HUMAN [3]	HBB	16 kDa	TRUE	unknown	22526	25453	0	27553	19986	0	17279	33735	0
43.1	TRUE	Empty	Hemoglobin subunit beta OS=Homo sapiens OX=9606 GN=HBB PE=1 SV=2	HBB_HUMAN	HBB	16 kDa	TRUE	unknown	22574	25453	0	27445	19986	0	0	33735	0
51.6	TRUE	Empty	Keratin, type II cytoskeletal 2 epidermal OS=Homo sapiens OX=9606 GN=KRT2 PE=1 SV=2	K22E_HUMAN	KRT2	65 kDa	TRUE	unknown	26020	28246	29836	34357	25354	23653	37467	33710	32577
44	TRUE	Empty	Annexin A4 OS=Homo sapiens OX=9606 GN=ANXA4 PE=1 SV=4	ANXA4_HUMAN	ANXA4	36 kDa		unknown	0	0	0	0	0	0	0	33702	14306
45	TRUE	Empty	Cluster of Elongation factor 1-alpha 1 OS=Homo sapiens OX=9606 GN=EEF1A1 PE=1 SV=1 (EF1A1_HUMAN)	EF1A1_HUMAN [2]	EEF1A1	50 kDa	TRUE	unknown	0	0	0	0	0	0	25295	33404	0
46	TRUE	Empty	Complement C3 OS=Homo sapiens OX=9606 GN=C3 PE=1 SV=2	CO3_HUMAN	C3	187 kDa		unknown	26174	27573	28072	24765	23834	22607	13509	33212	25278
58.2	TRUE	Empty	Actin, cytoplasmic 2 OS=Homo sapiens OX=9606 GN=ACTG1 PE=1 SV=1	ACTG_HUMAN	ACTG1	42 kDa	TRUE	unknown	31190	30506	28380	22547	24004	16240	29807	33116	29142
47	TRUE	Empty	Keratin, type II cytoskeletal 4 OS=Homo sapiens OX=9606 GN=KRT4 PE=1 SV=4	K2C4_HUMAN	KRT4	57 kDa	TRUE	unknown	0	0	94355	104080	0	44505	77500	32972	73127
48	TRUE	Empty	Cluster of Heat shock cognate 71 kDa protein OS=Homo sapiens OX=9606 GN=HSPA8 PE=1 SV=1 (HSP7C_HUMAN)	HSP7C_HUMAN	HSPA8	71 kDa	TRUE	unknown	0	0	0	0	0	0	18258	32951	18301
48.1	TRUE	Empty	Heat shock cognate 71 kDa protein OS=Homo sapiens OX=9606 GN=HSPA8 PE=1 SV=1	HSP7C_HUMAN	HSPA8	71 kDa	TRUE	unknown	0	0	0	0	0	0	18258	32951	18301
49	TRUE	Empty	CD9 antigen OS=Homo sapiens OX=9606 GN=CD9 PE=1 SV=4	CD9_HUMAN	CD9	25 kDa		unknown	0	0	0	0	0	0	0	32905	26861
50	TRUE	Empty	Tetraspanin-1 OS=Homo sapiens OX=9606 GN=TSPAN1 PE=1 SV=2	TSN1_HUMAN	TSPAN1	26 kDa		unknown	0	0	0	0	0	0	8821.7	32671	0
51	TRUE	Empty	Cluster of Keratin, type II cytoskeletal 1 OS=Homo sapiens OX=9606 GN=KRT1 PE=1 SV=6 (K2C1_HUMAN)	K2C1_HUMAN [13]	KRT1	66 kDa	TRUE	unknown	27921	30325	32177	33972	27004	27707	37155	32645	27713
52	TRUE	Empty	Cystatin-B OS=Homo sapiens OX=9606 GN=CSTB PE=1 SV=2	CYTB_HUMAN	CSTB	11 kDa		unknown	27606	38567	21371	35189	24292	21023	0	32329	0
53	TRUE	Empty	Serotransferrin OS=Homo sapiens OX=9606 GN=TF PE=1 SV=3	TRFE_HUMAN	TF	77 kDa	TRUE	unknown	38512	43245	37190	35531	37996	38974	11536	32210	28170
54	TRUE	Empty	Cluster of Histone H2B type 1-C/E/F/G/I OS=Homo sapiens OX=9606 GN=HIST1H2BC PE=1 SV=4 (H2B1C_HUMAN)	H2B1C_HUMAN [5]	HIST1H2BC	14 kDa	TRUE	unknown	0	0	0	0	0	0	0	32197	0
54.1	TRUE	Empty	Histone H2B type 1-C/E/F/G/I OS=Homo sapiens OX=9606 GN=HIST1H2BC PE=1 SV=4	H2B1C_HUMAN (+4)	HIST1H2BC	14 kDa	TRUE	unknown	0	0	0	0	0	0	0	32197	0
134.2	TRUE	Empty	Keratin, type I cytoskeletal 17 OS=Homo sapiens OX=9606 GN=KRT17 PE=1 SV=2	K1C17_HUMAN	KRT17	48 kDa	TRUE	unknown	25747	0	35499	22316	0	0	45009	32182	0
55	TRUE	Empty	Dipeptidyl peptidase 1 OS=Homo sapiens OX=9606 GN=CTSC PE=1 SV=2	CATC_HUMAN	CTSC	52 kDa		unknown	0	0	0	0	0	0	0	32113	0
58.3	TRUE	Empty	Actin, cytoplasmic 1 OS=Homo sapiens OX=9606 GN=ACTB PE=1 SV=1	ACTB_HUMAN	ACTB	42 kDa	TRUE	unknown	30821	29653	28380	22767	24004	0	28241	32060	28688
123.1	TRUE	Empty	Tubulin beta-4A chain OS=Homo sapiens OX=9606 GN=TUBB4A PE=1 SV=2	TBB4A_HUMAN	TUBB4A	50 kDa	TRUE	unknown	0	0	0	0	0	0	0	31872	0
61.1	TRUE	Empty	Complement C4-B OS=Homo sapiens OX=9606 GN=C4B PE=1 SV=2	CO4B_HUMAN	C4B	193 kDa	TRUE	unknown	22591	22957	21271	17911	18978	13569	13601	31832	16928
56	TRUE	Empty	Mucin-5AC OS=Homo sapiens OX=9606 GN=MUC5AC PE=1 SV=4	MUC5A_HUMAN	MUC5AC	586 kDa	TRUE	unknown	17059	29960	28602	22653	24311	0	0	31816	31999
57	TRUE	Empty	Solute carrier family 2, facilitated glucose transporter member 1 OS=Homo sapiens OX=9606 GN=SLC2A1 PE=1 SV=2	GTR1_HUMAN	SLC2A1	54 kDa	TRUE	unknown	0	0	0	0	0	0	0	31806	0
58	TRUE	Empty	Cluster of Actin, cytoplasmic 1 OS=Homo sapiens OX=9606 GN=ACTB PE=1 SV=1 (ACTB_HUMAN)	ACTB_HUMAN [4]	ACTB	42 kDa	TRUE	unknown	29779	29654	29813	22864	25073	17734	28241	31803	28375
59	TRUE	Empty	Prelamin-A/C OS=Homo sapiens OX=9606 GN=LMNA PE=1 SV=1	LMNA_HUMAN	LMNA	74 kDa		unknown	0	0	0	0	0	0	0	31567	0
60	TRUE	Empty	Zymogen granule protein 16 homolog B OS=Homo sapiens OX=9606 GN=ZG16B PE=1 SV=3	ZG16B_HUMAN	ZG16B	23 kDa		unknown	35341	36682	34421	36805	45142	40419	19382	31459	39335
61	TRUE	Empty	Cluster of Complement C4-A OS=Homo sapiens OX=9606 GN=C4A PE=1 SV=2 (CO4A_HUMAN)	CO4A_HUMAN [2]	C4A	193 kDa	TRUE	unknown	22093	22899	21271	17911	18978	13569	13601	31444	16923
61.2	TRUE	Empty	Complement C4-A OS=Homo sapiens OX=9606 GN=C4A PE=1 SV=2	CO4A_HUMAN	C4A	193 kDa	TRUE	unknown	22487	23186	22229	18136	19364	14247	0	31411	16979
62	TRUE	Empty	Adenosylhomocysteinase OS=Homo sapiens OX=9606 GN=AHCY PE=1 SV=4	SAHH_HUMAN	AHCY	48 kDa		unknown	0	0	0	0	0	0	0	31335	0
63	TRUE	Empty	Fibrinogen gamma chain OS=Homo sapiens OX=9606 GN=FGG PE=1 SV=3	FIBG_HUMAN	FGG	52 kDa		unknown	21192	20588	21309	24855	33761	0	18428	31326	23680
64	TRUE	Empty	Kininogen-1 OS=Homo sapiens OX=9606 GN=KNG1 PE=1 SV=2	KNG1_HUMAN	KNG1	72 kDa		unknown	31245	35189	31428	24197	27780	28366	0	31304	16219
65	TRUE	Empty	Cluster of Glyceraldehyde-3-phosphate dehydrogenase OS=Homo sapiens OX=9606 GN=GAPDH PE=1 SV=3 (G3P_HUMAN)	G3P_HUMAN	GAPDH	36 kDa	TRUE	unknown	21365	17205	16164	15212	0	0	16242	31138	12336
65.1	TRUE	Empty	Glyceraldehyde-3-phosphate dehydrogenase OS=Homo sapiens OX=9606 GN=GAPDH PE=1 SV=3	G3P_HUMAN	GAPDH	36 kDa	TRUE	unknown	21365	17205	16164	15212	0	0	16242	31138	12336
66	TRUE	Empty	Mucin-5B OS=Homo sapiens OX=9606 GN=MUC5B PE=1 SV=3	MUC5B_HUMAN	MUC5B	596 kDa	TRUE	unknown	16422	18909	15900	14312	16635	14903	0	30987	16664
67	TRUE	Empty	Transthyretin OS=Homo sapiens OX=9606 GN=TTR PE=1 SV=1	TTHY_HUMAN	TTR	16 kDa		unknown	26958	29776	29566	25060	26445	31217	11810	30951	0
68	TRUE	Empty	Serum amyloid P-component OS=Homo sapiens OX=9606 GN=APCS PE=1 SV=2	SAMP_HUMAN	APCS	25 kDa		unknown	0	0	0	0	0	0	0	30811	0
69	TRUE	Empty	Fascin OS=Homo sapiens OX=9606 GN=FSCN1 PE=1 SV=3	FSCN1_HUMAN	FSCN1	55 kDa		unknown	0	0	0	0	0	0	0	30698	0
70	TRUE	Empty	Cysteine-rich tail protein 1 OS=Homo sapiens OX=9606 GN=CYSRT1 PE=1 SV=1	CRTP1_HUMAN	CYSRT1	15 kDa		unknown	0	0	0	0	0	0	0	30594	0
71	TRUE	Empty	Cluster of Phosphoglycerate kinase 1 OS=Homo sapiens OX=9606 GN=PGK1 PE=1 SV=3 (PGK1_HUMAN)	PGK1_HUMAN	PGK1	45 kDa	TRUE	unknown	26126	0	0	0	0	0	12429	30540	0
71.1	TRUE	Empty	Phosphoglycerate kinase 1 OS=Homo sapiens OX=9606 GN=PGK1 PE=1 SV=3	PGK1_HUMAN	PGK1	45 kDa	TRUE	unknown	26126	0	0	0	0	0	12429	30540	0
72	TRUE	Empty	Cluster of Fatty acid-binding protein 5 OS=Homo sapiens OX=9606 GN=FABP5 PE=1 SV=3 (FABP5_HUMAN)	FABP5_HUMAN	FABP5	15 kDa	TRUE	unknown	23088	30089	0	16681	21344	0	0	30499	0
72.1	TRUE	Empty	Fatty acid-binding protein 5 OS=Homo sapiens OX=9606 GN=FABP5 PE=1 SV=3	FABP5_HUMAN	FABP5	15 kDa	TRUE	unknown	23088	30089	0	16681	21344	0	0	30499	0
51.7	TRUE	Empty	Keratin, type II cytoskeletal 5 OS=Homo sapiens OX=9606 GN=KRT5 PE=1 SV=3	K2C5_HUMAN	KRT5	62 kDa	TRUE	unknown	33717	32061	41111	36749	28346	29626	37798	30375	33873
73	TRUE	Empty	Peptidyl-prolyl cis-trans isomerase A OS=Homo sapiens OX=9606 GN=PPIA PE=1 SV=2	PPIA_HUMAN	PPIA	18 kDa		unknown	22941	23398	17757	19237	17364	0	20815	30323	17160
74	TRUE	Empty	Complement component C8 gamma chain OS=Homo sapiens OX=9606 GN=C8G PE=1 SV=3	CO8G_HUMAN	C8G	22 kDa		unknown	19217	25145	21790	15965	21391	0	0	30101	0
75	TRUE	Empty	Pyruvate kinase PKM OS=Homo sapiens OX=9606 GN=PKM PE=1 SV=4	KPYM_HUMAN	PKM	58 kDa	TRUE	unknown	20651	19938	0	0	0	0	13646	30063	20727
76	TRUE	Empty	Annexin A11 OS=Homo sapiens OX=9606 GN=ANXA11 PE=1 SV=1	ANX11_HUMAN	ANXA11	54 kDa		unknown	0	0	0	0	0	0	12901	29989	20639
77	TRUE	Empty	Alpha-2-antiplasmin OS=Homo sapiens OX=9606 GN=SERPINF2 PE=1 SV=3	A2AP_HUMAN	SERPINF2	55 kDa		unknown	15363	29851	24735	20408	22929	19545	0	29915	0
78	TRUE	Empty	Complement C5 OS=Homo sapiens OX=9606 GN=C5 PE=1 SV=4	CO5_HUMAN	C5	188 kDa		unknown	20458	23442	16085	0	0	0	0	29915	19796
105.1	TRUE	Empty	Vacuolar protein sorting-associated protein 4B OS=Homo sapiens OX=9606 GN=VPS4B PE=1 SV=2	VPS4B_HUMAN	VPS4B	49 kDa	TRUE	unknown	0	0	0	0	0	0	0	29647	16639
79	TRUE	Empty	Gastric triacylglycerol lipase OS=Homo sapiens OX=9606 GN=LIPF PE=1 SV=1	LIPG_HUMAN	LIPF	45 kDa		unknown	17515	27703	0	0	0	0	11448	29567	11831
80	TRUE	Empty	Methanethiol oxidase OS=Homo sapiens OX=9606 GN=SELENBP1 PE=1 SV=2	SBP1_HUMAN	SELENBP1	52 kDa		unknown	0	0	0	0	0	0	11409	29533	0
134.3	TRUE	Empty	Keratin, type I cytoskeletal 19 OS=Homo sapiens OX=9606 GN=KRT19 PE=1 SV=4	K1C19_HUMAN	KRT19	44 kDa	TRUE	unknown	0	0	0	0	0	0	0	29505	0
81	TRUE	Empty	BPI fold-containing family A member 1 OS=Homo sapiens OX=9606 GN=BPIFA1 PE=1 SV=1	BPIA1_HUMAN	BPIFA1	27 kDa		unknown	0	0	0	0	0	0	0	29430	0
82	TRUE	Empty	Protein S100-A10 OS=Homo sapiens OX=9606 GN=S100A10 PE=1 SV=2	S10AA_HUMAN	S100A10	11 kDa		unknown	0	0	0	0	0	0	0	29212	0
123.2	TRUE	Empty	Tubulin beta-4B chain OS=Homo sapiens OX=9606 GN=TUBB4B PE=1 SV=1	TBB4B_HUMAN	TUBB4B	50 kDa	TRUE	unknown	0	0	0	0	0	0	0	29196	0
83	TRUE	Empty	Hemopexin OS=Homo sapiens OX=9606 GN=HPX PE=1 SV=2	HEMO_HUMAN	HPX	52 kDa		unknown	39961	38896	35376	38453	35660	36570	13412	29110	29087
84	TRUE	Empty	Fibronectin OS=Homo sapiens OX=9606 GN=FN1 PE=1 SV=4	FINC_HUMAN	FN1	263 kDa		unknown	21381	25100	24164	20514	20335	22315	11515	29029	21182
85	TRUE	Empty	Charged multivesicular body protein 2a OS=Homo sapiens OX=9606 GN=CHMP2A PE=1 SV=1	CHM2A_HUMAN	CHMP2A	25 kDa		unknown	0	0	0	0	0	0	0	28750	16800
86	TRUE	Empty	Small proline-rich protein 3 OS=Homo sapiens OX=9606 GN=SPRR3 PE=1 SV=2	SPRR3_HUMAN	SPRR3	18 kDa		unknown	0	0	0	0	9131.7	0	9991.8	28749	0
134.4	TRUE	Empty	Keratin, type I cytoskeletal 16 OS=Homo sapiens OX=9606 GN=KRT16 PE=1 SV=4	K1C16_HUMAN	KRT16	51 kDa	TRUE	unknown	23164	18354	21462	26516	21833	25577	41165	28684	18099
87	TRUE	Empty	Plasminogen activator inhibitor 2 OS=Homo sapiens OX=9606 GN=SERPINB2 PE=1 SV=2	PAI2_HUMAN	SERPINB2	47 kDa		unknown	0	11957	0	0	11257	13607	0	28543	0
88	TRUE	Empty	Fibrinogen alpha chain OS=Homo sapiens OX=9606 GN=FGA PE=1 SV=2	FIBA_HUMAN	FGA	95 kDa		unknown	14359	17491	20274	15895	17726	16573	10149	28491	19274
89	TRUE	Empty	Prothrombin OS=Homo sapiens OX=9606 GN=F2 PE=1 SV=2	THRB_HUMAN	F2	70 kDa		unknown	20519	20011	20022	21168	22462	17945	0	28338	13396
90	TRUE	Empty	Cluster of Alpha-actinin-4 OS=Homo sapiens OX=9606 GN=ACTN4 PE=1 SV=2 (ACTN4_HUMAN)	ACTN4_HUMAN [2]	ACTN4	105 kDa	TRUE	unknown	0	10712	0	0	0	0	7755.5	28051	14195
120.1	TRUE	Empty	Cofilin-1 OS=Homo sapiens OX=9606 GN=CFL1 PE=1 SV=3	COF1_HUMAN	CFL1	19 kDa	TRUE	unknown	12766	0	0	0	0	0	0	27976	21029
91	TRUE	Empty	Prostasin OS=Homo sapiens OX=9606 GN=PRSS8 PE=1 SV=1	PRSS8_HUMAN	PRSS8	36 kDa		unknown	22995	0	0	0	20973	19168	0	27935	0
92	TRUE	Empty	Protein S100-A11 OS=Homo sapiens OX=9606 GN=S100A11 PE=1 SV=2	S10AB_HUMAN	S100A11	12 kDa		unknown	0	0	0	0	0	0	0	27892	0
175.1	TRUE	Empty	Ras-related protein Rab-14 OS=Homo sapiens OX=9606 GN=RAB14 PE=1 SV=4	RAB14_HUMAN	RAB14	24 kDa	TRUE	unknown	0	0	0	0	0	0	0	27877	0
175.2	TRUE	Empty	Ras-related protein Rab-10 OS=Homo sapiens OX=9606 GN=RAB10 PE=1 SV=1	RAB10_HUMAN	RAB10	23 kDa	TRUE	unknown	0	0	0	0	0	0	0	27760	0
93	TRUE	Empty	Fibrinogen beta chain OS=Homo sapiens OX=9606 GN=FGB PE=1 SV=2	FIBB_HUMAN	FGB	56 kDa		unknown	11155	16411	14410	10157	0	0	8653	27708	19885
94	TRUE	Empty	BPI fold-containing family B member 1 OS=Homo sapiens OX=9606 GN=BPIFB1 PE=1 SV=1	BPIB1_HUMAN	BPIFB1	52 kDa		unknown	17046	25127	23130	12725	19190	24432	14067	27680	24304
95	TRUE	Empty	Lysosome membrane protein 2 OS=Homo sapiens OX=9606 GN=SCARB2 PE=1 SV=2	SCRB2_HUMAN	SCARB2	54 kDa		unknown	0	0	0	0	0	0	0	27660	22076
175.3	TRUE	Empty	Ras-related protein Rab-1A OS=Homo sapiens OX=9606 GN=RAB1A PE=1 SV=3	RAB1A_HUMAN	RAB1A	23 kDa	TRUE	unknown	0	0	0	0	0	0	0	27564	0
108.1	TRUE	Empty	L-lactate dehydrogenase A chain OS=Homo sapiens OX=9606 GN=LDHA PE=1 SV=2	LDHA_HUMAN	LDHA	37 kDa	TRUE	unknown	0	0	0	0	0	0	0	27542	8332.6
90.1	TRUE	Empty	Alpha-actinin-4 OS=Homo sapiens OX=9606 GN=ACTN4 PE=1 SV=2	ACTN4_HUMAN	ACTN4	105 kDa	TRUE	unknown	0	14587	0	0	0	0	7755.5	27375	14195
96	TRUE	Empty	Pulmonary surfactant-associated protein A1 OS=Homo sapiens OX=9606 GN=SFTPA1 PE=1 SV=2	SFTA1_HUMAN	SFTPA1	26 kDa		unknown	12691	15966	18025	11077	10159	10604	20089	27289	27180
194.1	TRUE	Empty	Radixin OS=Homo sapiens OX=9606 GN=RDX PE=1 SV=1	RADI_HUMAN	RDX	69 kDa	TRUE	unknown	0	0	0	0	0	0	22949	27224	29590
97	TRUE	Empty	Complement C2 OS=Homo sapiens OX=9606 GN=C2 PE=1 SV=2	CO2_HUMAN	C2	83 kDa		unknown	24022	26255	28033	21282	28680	16737	0	27185	0
98	TRUE	Empty	Plectin OS=Homo sapiens OX=9606 GN=PLEC PE=1 SV=3	PLEC_HUMAN	PLEC	532 kDa	TRUE	unknown	0	0	0	0	0	0	0	27176	0
99	TRUE	Empty	Pigment epithelium-derived factor OS=Homo sapiens OX=9606 GN=SERPINF1 PE=1 SV=4	PEDF_HUMAN	SERPINF1	46 kDa		unknown	28036	29758	27131	27220	23830	25341	0	27132	0
100	TRUE	Empty	Thioredoxin OS=Homo sapiens OX=9606 GN=TXN PE=1 SV=3	THIO_HUMAN	TXN	12 kDa		unknown	23695	27523	21339	0	23169	9684.3	0	27041	0
101	TRUE	Empty	Inter-alpha-trypsin inhibitor heavy chain H2 OS=Homo sapiens OX=9606 GN=ITIH2 PE=1 SV=2	ITIH2_HUMAN	ITIH2	106 kDa		unknown	17498	21845	20708	14918	18850	16170	0	26942	0
139.1	TRUE	Empty	Immunoglobulin lambda constant 3 OS=Homo sapiens OX=9606 GN=IGLC3 PE=1 SV=1	IGLC3_HUMAN	IGLC3	11 kDa	TRUE	unknown	33012	29116	29723	26445	30333	28179	0	26905	0
123.3	TRUE	Empty	Tubulin beta chain OS=Homo sapiens OX=9606 GN=TUBB PE=1 SV=2	TBB5_HUMAN	TUBB	50 kDa	TRUE	unknown	0	0	0	0	0	0	0	26840	0
102	TRUE	Empty	Cluster of EH domain-containing protein 1 OS=Homo sapiens OX=9606 GN=EHD1 PE=1 SV=2 (EHD1_HUMAN)	EHD1_HUMAN	EHD1	61 kDa	TRUE	unknown	0	0	0	0	0	0	13757	26822	16399
102.1	TRUE	Empty	EH domain-containing protein 1 OS=Homo sapiens OX=9606 GN=EHD1 PE=1 SV=2	EHD1_HUMAN	EHD1	61 kDa	TRUE	unknown	0	0	0	0	0	0	13757	26822	16399
103	TRUE	Empty	Immunoglobulin kappa variable 3-20 OS=Homo sapiens OX=9606 GN=IGKV3-20 PE=1 SV=2	KV320_HUMAN	IGKV3-20	13 kDa	TRUE	unknown	26856	33919	20303	23904	29569	20805	0	26765	0
104.1	TRUE	Empty	Plasminogen OS=Homo sapiens OX=9606 GN=PLG PE=1 SV=2	PLMN_HUMAN	PLG	91 kDa	TRUE	unknown	22408	22870	27295	23423	22900	19328	0	26670	15841
104	TRUE	Empty	Cluster of Plasminogen OS=Homo sapiens OX=9606 GN=PLG PE=1 SV=2 (PLMN_HUMAN)	PLMN_HUMAN	PLG	91 kDa	TRUE	unknown	22408	22870	27295	23423	22900	19328	0	26669	15841
105	TRUE	Empty	Cluster of Vacuolar protein sorting-associated protein 4B OS=Homo sapiens OX=9606 GN=VPS4B PE=1 SV=2 (VPS4B_HUMAN)	VPS4B_HUMAN [2]	VPS4B	49 kDa	TRUE	unknown	0	0	0	0	0	0	0	26636	16639
167.1	TRUE	Empty	Tubulin alpha-3D chain OS=Homo sapiens OX=9606 GN=TUBA3D PE=1 SV=1	TBA3D_HUMAN	TUBA3D	50 kDa	TRUE	unknown	0	0	0	0	0	0	0	26497	0
106	TRUE	Empty	Carbonic anhydrase 2 OS=Homo sapiens OX=9606 GN=CA2 PE=1 SV=2	CAH2_HUMAN	CA2	29 kDa		unknown	0	0	0	0	0	0	0	26489	0
107	TRUE	Empty	CD59 glycoprotein OS=Homo sapiens OX=9606 GN=CD59 PE=1 SV=1	CD59_HUMAN	CD59	14 kDa		unknown	0	16030	18514	31343	26454	26101	24201	26476	28494
120.2	TRUE	Empty	Cofilin-2 OS=Homo sapiens OX=9606 GN=CFL2 PE=1 SV=1	COF2_HUMAN	CFL2	19 kDa	TRUE	unknown	0	0	0	0	0	0	0	26363	18092
198.1	TRUE	Empty	Carcinoembryonic antigen-related cell adhesion molecule 5 OS=Homo sapiens OX=9606 GN=CEACAM5 PE=1 SV=3	CEAM5_HUMAN	CEACAM5	77 kDa	TRUE	unknown	0	0	0	0	0	0	9967	26215	0
108	TRUE	Empty	Cluster of L-lactate dehydrogenase A chain OS=Homo sapiens OX=9606 GN=LDHA PE=1 SV=2 (LDHA_HUMAN)	LDHA_HUMAN [2]	LDHA	37 kDa	TRUE	unknown	0	0	0	0	0	0	0	26211	8415.9
127.1	TRUE	Empty	Heat shock protein HSP 90-beta OS=Homo sapiens OX=9606 GN=HSP90AB1 PE=1 SV=4	HS90B_HUMAN	HSP90AB1	83 kDa	TRUE	unknown	0	0	0	0	0	0	12890	26191	14755
109	TRUE	Empty	Mannan-binding lectin serine protease 2 OS=Homo sapiens OX=9606 GN=MASP2 PE=1 SV=4	MASP2_HUMAN	MASP2	76 kDa		unknown	0	17326	18289	0	0	14749	0	26082	0
110	TRUE	Empty	Neuroblast differentiation-associated protein AHNAK OS=Homo sapiens OX=9606 GN=AHNAK PE=1 SV=2	AHNK_HUMAN	AHNAK	629 kDa		unknown	0	0	0	0	0	0	10226	25983	0
134.5	TRUE	Empty	Keratin, type I cytoskeletal 14 OS=Homo sapiens OX=9606 GN=KRT14 PE=1 SV=4	K1C14_HUMAN	KRT14	52 kDa	TRUE	unknown	22045	21595	24143	26509	20709	19072	42799	25952	23362
111	TRUE	Empty	Bleomycin hydrolase OS=Homo sapiens OX=9606 GN=BLMH PE=1 SV=1	BLMH_HUMAN	BLMH	53 kDa		unknown	0	0	28091	0	0	0	15063	25952	0
112	TRUE	Empty	Puromycin-sensitive aminopeptidase OS=Homo sapiens OX=9606 GN=NPEPPS PE=1 SV=2	PSA_HUMAN	NPEPPS	103 kDa		unknown	0	0	0	0	0	0	0	25849	0
113	TRUE	Empty	Extracellular matrix protein 1 OS=Homo sapiens OX=9606 GN=ECM1 PE=1 SV=2	ECM1_HUMAN	ECM1	61 kDa		unknown	0	22638	20497	19527	16200	0	0	25784	0
114	TRUE	Empty	Epidermal growth factor receptor kinase substrate 8-like protein 2 OS=Homo sapiens OX=9606 GN=EPS8L2 PE=1 SV=2	ES8L2_HUMAN	EPS8L2	81 kDa		unknown	0	0	0	0	0	0	17370	25709	24610
194.2	TRUE	Empty	Moesin OS=Homo sapiens OX=9606 GN=MSN PE=1 SV=3	MOES_HUMAN	MSN	68 kDa	TRUE	unknown	0	0	0	0	0	0	24449	25701	23475
115	TRUE	Empty	6-phosphogluconate dehydrogenase, decarboxylating OS=Homo sapiens OX=9606 GN=PGD PE=1 SV=3	6PGD_HUMAN	PGD	53 kDa		unknown	0	0	0	0	0	0	9654.6	25691	0
116	TRUE	Empty	Transmembrane protease serine 11B OS=Homo sapiens OX=9606 GN=TMPRSS11B PE=2 SV=3	TM11B_HUMAN	TMPRSS11B	46 kDa		unknown	0	0	0	0	0	0	0	25617	0
117	TRUE	Empty	Palmitoleoyl-protein carboxylesterase NOTUM OS=Homo sapiens OX=9606 GN=NOTUM PE=1 SV=2	NOTUM_HUMAN	NOTUM	56 kDa		unknown	0	35593	14339	26748	0	0	0	25469	12716
118	TRUE	Empty	Cluster of HLA class II histocompatibility antigen, DR alpha chain OS=Homo sapiens OX=9606 GN=HLA-DRA PE=1 SV=1 (DRA_HUMAN)	DRA_HUMAN	HLA-DRA	29 kDa	TRUE	unknown	0	0	0	0	0	0	0	25409	0
118.1	TRUE	Empty	HLA class II histocompatibility antigen, DR alpha chain OS=Homo sapiens OX=9606 GN=HLA-DRA PE=1 SV=1	DRA_HUMAN	HLA-DRA	29 kDa	TRUE	unknown	0	0	0	0	0	0	0	25409	0
119	TRUE	Empty	Brain-specific angiogenesis inhibitor 1-associated protein 2 OS=Homo sapiens OX=9606 GN=BAIAP2 PE=1 SV=1	BAIP2_HUMAN	BAIAP2	61 kDa		unknown	0	0	0	0	0	0	14400	25380	11824
127.2	TRUE	Empty	Heat shock protein HSP 90-alpha OS=Homo sapiens OX=9606 GN=HSP90AA1 PE=1 SV=5	HS90A_HUMAN	HSP90AA1	85 kDa	TRUE	unknown	0	0	0	0	0	0	11868	25377	0
120	TRUE	Empty	Cluster of Cofilin-1 OS=Homo sapiens OX=9606 GN=CFL1 PE=1 SV=3 (COF1_HUMAN)	COF1_HUMAN [2]	CFL1	19 kDa	TRUE	unknown	12766	0	0	0	0	0	0	25344	16066
121	TRUE	Empty	Proteasome subunit alpha type-6 OS=Homo sapiens OX=9606 GN=PSMA6 PE=1 SV=1	PSA6_HUMAN	PSMA6	27 kDa		unknown	0	0	0	0	0	0	0	25341	0
122	TRUE	Empty	Cluster of Heat shock 70 kDa protein 1B OS=Homo sapiens OX=9606 GN=HSPA1B PE=1 SV=1 (HS71B_HUMAN)	HS71B_HUMAN [2]	HSPA1B	70 kDa	TRUE	unknown	0	0	0	0	0	0	14674	25338	19516
123	TRUE	Empty	Cluster of Tubulin beta chain OS=Homo sapiens OX=9606 GN=TUBB PE=1 SV=2 (TBB5_HUMAN)	TBB5_HUMAN [5]	TUBB	50 kDa	TRUE	unknown	0	0	0	0	0	0	11982	25305	0
124	TRUE	Empty	Glia-derived nexin OS=Homo sapiens OX=9606 GN=SERPINE2 PE=1 SV=1	GDN_HUMAN	SERPINE2	44 kDa	TRUE	unknown	13342	24039	14691	4636.3	19256	9381.1	0	25260	12319
108.2	TRUE	Empty	L-lactate dehydrogenase B chain OS=Homo sapiens OX=9606 GN=LDHB PE=1 SV=2	LDHB_HUMAN	LDHB	37 kDa	TRUE	unknown	0	0	0	0	0	0	0	25230	0
125	TRUE	Empty	Dihydropyrimidinase-related protein 2 OS=Homo sapiens OX=9606 GN=DPYSL2 PE=1 SV=1	DPYL2_HUMAN	DPYSL2	62 kDa	TRUE	unknown	0	0	0	0	0	0	0	25222	0
167.2	TRUE	Empty	Tubulin alpha-1C chain OS=Homo sapiens OX=9606 GN=TUBA1C PE=1 SV=1	TBA1C_HUMAN	TUBA1C	50 kDa	TRUE	unknown	0	0	0	0	0	0	10447	25186	0
126.1	TRUE	Empty	Haptoglobin OS=Homo sapiens OX=9606 GN=HP PE=1 SV=1	HPT_HUMAN	HP	45 kDa	TRUE	unknown	26101	22398	0	24649	28238	0	0	25175	0
126	TRUE	Empty	Cluster of Haptoglobin OS=Homo sapiens OX=9606 GN=HP PE=1 SV=1 (HPT_HUMAN)	HPT_HUMAN [2]	HP	45 kDa	TRUE	unknown	26101	22398	0	24649	22124	0	0	25175	0
122.1	TRUE	Empty	Heat shock 70 kDa protein 1B OS=Homo sapiens OX=9606 GN=HSPA1B PE=1 SV=1	HS71B_HUMAN	HSPA1B	70 kDa	TRUE	unknown	0	0	0	0	0	0	14674	25106	19389
127	TRUE	Empty	Cluster of Heat shock protein HSP 90-alpha OS=Homo sapiens OX=9606 GN=HSP90AA1 PE=1 SV=5 (HS90A_HUMAN)	HS90A_HUMAN [2]	HSP90AA1	85 kDa	TRUE	unknown	0	0	0	0	0	0	11079	25071	14755
128	TRUE	Empty	Complement component C9 OS=Homo sapiens OX=9606 GN=C9 PE=1 SV=2	CO9_HUMAN	C9	63 kDa	TRUE	unknown	14986	13885	25461	10729	12662	17376	0	25053	19650
129	TRUE	Empty	Mucin-1 OS=Homo sapiens OX=9606 GN=MUC1 PE=1 SV=3	MUC1_HUMAN	MUC1	122 kDa		unknown	0	0	0	0	0	0	23770	24938	31674
130	TRUE	Empty	Cluster of Complement factor H OS=Homo sapiens OX=9606 GN=CFH PE=1 SV=4 (CFAH_HUMAN)	CFAH_HUMAN	CFH	139 kDa	TRUE	unknown	13332	14607	15247	21526	0	5696	0	24936	15921
130.1	TRUE	Empty	Complement factor H OS=Homo sapiens OX=9606 GN=CFH PE=1 SV=4	CFAH_HUMAN	CFH	139 kDa	TRUE	unknown	13332	14607	15247	21526	0	5696	0	24936	15921
131	TRUE	Empty	Actin-related protein 2/3 complex subunit 1A OS=Homo sapiens OX=9606 GN=ARPC1A PE=2 SV=2	ARC1A_HUMAN	ARPC1A	42 kDa	TRUE	unknown	0	0	0	0	0	0	0	24894	0
161.2	TRUE	Empty	Immunoglobulin heavy variable 3-30-5 OS=Homo sapiens OX=9606 GN=IGHV3-30-5 PE=3 SV=1	HV335_HUMAN	IGHV3-30-5	13 kDa	TRUE	unknown	0	31595	0	0	31704	0	0	24884	0
132	TRUE	Empty	Keratin, type I cytoskeletal 9 OS=Homo sapiens OX=9606 GN=KRT9 PE=1 SV=3	K1C9_HUMAN	KRT9	62 kDa	TRUE	unknown	24542	21296	24558	27066	23676	19352	34374	24805	26136
134.6	TRUE	Empty	Keratin, type I cytoskeletal 10 OS=Homo sapiens OX=9606 GN=KRT10 PE=1 SV=6	K1C10_HUMAN	KRT10	59 kDa	TRUE	unknown	19976	21639	29159	29771	20589	24296	40097	24705	29044
133	TRUE	Empty	Lipopolysaccharide-binding protein OS=Homo sapiens OX=9606 GN=LBP PE=1 SV=3	LBP_HUMAN	LBP	53 kDa		unknown	0	0	0	0	0	0	0	24698	0
134	TRUE	Empty	Cluster of Keratin, type I cytoskeletal 10 OS=Homo sapiens OX=9606 GN=KRT10 PE=1 SV=6 (K1C10_HUMAN)	K1C10_HUMAN [10]	KRT10	59 kDa	TRUE	unknown	20162	21312	26264	27723	20429	23502	38893	24596	25955
369.1	TRUE	Empty	Guanine nucleotide-binding protein G(i) subunit alpha-2 OS=Homo sapiens OX=9606 GN=GNAI2 PE=1 SV=3	GNAI2_HUMAN	GNAI2	40 kDa	TRUE	unknown	0	0	0	0	0	0	0	24563	20708
136.1	TRUE	Empty	Immunoglobulin kappa constant OS=Homo sapiens OX=9606 GN=IGKC PE=1 SV=2	IGKC_HUMAN	IGKC	12 kDa	TRUE	unknown	26818	31850	27627	26291	27258	27006	14382	24528	22759
135	TRUE	Empty	Metalloreductase STEAP4 OS=Homo sapiens OX=9606 GN=STEAP4 PE=1 SV=1	STEA4_HUMAN	STEAP4	52 kDa		unknown	0	0	0	0	0	0	0	24509	0
147.1	TRUE	Empty	Ras-related protein Rap-1A OS=Homo sapiens OX=9606 GN=RAP1A PE=1 SV=1	RAP1A_HUMAN	RAP1A	21 kDa	TRUE	unknown	0	0	0	0	0	0	21993	24500	0
194.3	TRUE	Empty	Ezrin OS=Homo sapiens OX=9606 GN=EZR PE=1 SV=4	EZRI_HUMAN	EZR	69 kDa	TRUE	unknown	0	23888	0	0	19782	0	22469	24493	28848
136	TRUE	Empty	Cluster of Immunoglobulin kappa constant OS=Homo sapiens OX=9606 GN=IGKC PE=1 SV=2 (IGKC_HUMAN)	IGKC_HUMAN [2]	IGKC	12 kDa	TRUE	unknown	26002	30996	27421	25757	26889	26771	14382	24477	22472
137	TRUE	Empty	Plasminogen activator inhibitor 1 OS=Homo sapiens OX=9606 GN=SERPINE1 PE=1 SV=1	PAI1_HUMAN	SERPINE1	45 kDa		unknown	17560	22756	22523	21499	26750	21404	0	24348	0
138	TRUE	Empty	Apolipoprotein D OS=Homo sapiens OX=9606 GN=APOD PE=1 SV=1	APOD_HUMAN	APOD	21 kDa		unknown	0	12950	0	0	0	0	0	24269	19572
139	TRUE	Empty	Cluster of Immunoglobulin lambda constant 3 OS=Homo sapiens OX=9606 GN=IGLC3 PE=1 SV=1 (IGLC3_HUMAN)	IGLC3_HUMAN	IGLC3	11 kDa	TRUE	unknown	29454	27840	26519	23728	26348	25424	0	24206	0
140	TRUE	Empty	Carcinoembryonic antigen-related cell adhesion molecule 6 OS=Homo sapiens OX=9606 GN=CEACAM6 PE=1 SV=3	CEAM6_HUMAN	CEACAM6	37 kDa	TRUE	unknown	0	0	0	0	0	0	0	24203	14172
141	TRUE	Empty	Tenascin-X OS=Homo sapiens OX=9606 GN=TNXB PE=1 SV=5	TENX_HUMAN	TNXB	458 kDa		unknown	0	0	0	0	0	0	0	24186	0
147.2	TRUE	Empty	Ras-related protein Rap-1b OS=Homo sapiens OX=9606 GN=RAP1B PE=1 SV=1	RAP1B_HUMAN	RAP1B	21 kDa	TRUE	unknown	0	0	0	0	0	0	22695	24173	0
105.2	TRUE	Empty	Vacuolar protein sorting-associated protein 4A OS=Homo sapiens OX=9606 GN=VPS4A PE=1 SV=1	VPS4A_HUMAN	VPS4A	49 kDa	TRUE	unknown	0	0	0	0	0	0	0	24138	0
142	TRUE	Empty	Calpain-1 catalytic subunit OS=Homo sapiens OX=9606 GN=CAPN1 PE=1 SV=1	CAN1_HUMAN	CAPN1	82 kDa		unknown	0	0	0	0	0	0	0	24005	0
143	TRUE	Empty	Complement decay-accelerating factor OS=Homo sapiens OX=9606 GN=CD55 PE=1 SV=4	DAF_HUMAN	CD55	41 kDa		unknown	0	15497	7647.2	0	0	0	0	23988	21737
144	TRUE	Empty	Programmed cell death 6-interacting protein OS=Homo sapiens OX=9606 GN=PDCD6IP PE=1 SV=1	PDC6I_HUMAN	PDCD6IP	96 kDa		unknown	0	0	0	0	0	0	12762	23929	18479
145	TRUE	Empty	Cysteine-rich protein 2 OS=Homo sapiens OX=9606 GN=CRIP2 PE=1 SV=1	CRIP2_HUMAN	CRIP2	22 kDa		unknown	0	0	0	0	0	0	0	23855	8608.5
146	TRUE	Empty	BPI fold-containing family B member 2 OS=Homo sapiens OX=9606 GN=BPIFB2 PE=1 SV=2	BPIB2_HUMAN	BPIFB2	49 kDa		unknown	12798	15566	9271.4	0	0	0	0	23796	8732.6
147	TRUE	Empty	Cluster of Ras-related protein Rap-1A OS=Homo sapiens OX=9606 GN=RAP1A PE=1 SV=1 (RAP1A_HUMAN)	RAP1A_HUMAN [2]	RAP1A	21 kDa	TRUE	unknown	0	0	0	0	0	0	18981	23791	0
148	TRUE	Empty	Cluster of Immunoglobulin heavy variable 5-51 OS=Homo sapiens OX=9606 GN=IGHV5-51 PE=3 SV=1 (HV551_HUMAN)	HV551_HUMAN	IGHV5-51	13 kDa	TRUE	unknown	21383	36261	19700	28440	34048	26075	0	23786	0
148.1	TRUE	Empty	Immunoglobulin heavy variable 5-51 OS=Homo sapiens OX=9606 GN=IGHV5-51 PE=3 SV=1	HV551_HUMAN	IGHV5-51	13 kDa	TRUE	unknown	21383	36261	19700	28440	34048	26075	0	23786	0
149	TRUE	Empty	Galectin-7 OS=Homo sapiens OX=9606 GN=LGALS7 PE=1 SV=2	LEG7_HUMAN	LGALS7	15 kDa		unknown	0	0	0	0	0	0	16390	23749	0
150	TRUE	Empty	Plasma protease C1 inhibitor OS=Homo sapiens OX=9606 GN=SERPING1 PE=1 SV=2	IC1_HUMAN	SERPING1	55 kDa		unknown	20892	38469	26869	27488	29232	24647	0	23748	0
151	TRUE	Empty	Lysozyme C OS=Homo sapiens OX=9606 GN=LYZ PE=1 SV=1	LYSC_HUMAN	LYZ	17 kDa		unknown	21483	25518	23608	18067	18555	23560	11619	23717	15156
152	TRUE	Empty	Amiloride-sensitive amine oxidase [copper-containing] OS=Homo sapiens OX=9606 GN=AOC1 PE=1 SV=4	AOC1_HUMAN	AOC1	85 kDa		unknown	23691	32326	27253	31281	29036	26970	0	23704	0
153	TRUE	Empty	Pulmonary surfactant-associated protein D OS=Homo sapiens OX=9606 GN=SFTPD PE=1 SV=3	SFTPD_HUMAN	SFTPD	38 kDa		unknown	39031	27325	26357	21482	21083	25618	0	23649	17503
154	TRUE	Empty	Gelsolin OS=Homo sapiens OX=9606 GN=GSN PE=1 SV=1	GELS_HUMAN	GSN	86 kDa		unknown	19685	21652	22183	16204	19307	19152	3114.3	23576	9899
136.2	TRUE	Empty	Immunoglobulin kappa light chain OS=Homo sapiens OX=9606 PE=1 SV=1	IGK_HUMAN		23 kDa	TRUE	unknown	25251	29152	25054	23611	24666	26220	15363	23515	22562
155	TRUE	Empty	Lysosomal alpha-glucosidase OS=Homo sapiens OX=9606 GN=GAA PE=1 SV=4	LYAG_HUMAN	GAA	105 kDa		unknown	0	0	0	0	0	0	0	23477	0
156	TRUE	Empty	Glutathione S-transferase P OS=Homo sapiens OX=9606 GN=GSTP1 PE=1 SV=2	GSTP1_HUMAN	GSTP1	23 kDa		unknown	18755	19250	15766	24550	18930	0	0	23463	7701.7
167.3	TRUE	Empty	Tubulin alpha-4A chain OS=Homo sapiens OX=9606 GN=TUBA4A PE=1 SV=1	TBA4A_HUMAN	TUBA4A	50 kDa	TRUE	unknown	0	0	0	0	0	0	0	23438	0
157	TRUE	Empty	Coagulation factor XII OS=Homo sapiens OX=9606 GN=F12 PE=1 SV=3	FA12_HUMAN	F12	68 kDa		unknown	24188	37792	15312	32615	34540	16251	0	23398	0
158	TRUE	Empty	Fructose-bisphosphate aldolase A OS=Homo sapiens OX=9606 GN=ALDOA PE=1 SV=2	ALDOA_HUMAN	ALDOA	39 kDa	TRUE	unknown	34587	26697	25801	0	29935	0	0	23362	0
159	TRUE	Empty	Deleted in malignant brain tumors 1 protein OS=Homo sapiens OX=9606 GN=DMBT1 PE=1 SV=2	DMBT1_HUMAN	DMBT1	261 kDa		unknown	15802	20465	16126	14079	12127	15485	19433	23324	17370
160	TRUE	Empty	Clusterin OS=Homo sapiens OX=9606 GN=CLU PE=1 SV=1	CLUS_HUMAN	CLU	52 kDa		unknown	19185	17515	20416	13127	12719	13133	0	23281	22014
161	TRUE	Empty	Cluster of Immunoglobulin heavy variable 3-21 OS=Homo sapiens OX=9606 GN=IGHV3-21 PE=1 SV=1 (HV321_HUMAN)	HV321_HUMAN [7]	IGHV3-21	13 kDa	TRUE	unknown	25627	28165	26174	28350	29400	23494	0	23209	0
162	TRUE	Empty	Lactoperoxidase OS=Homo sapiens OX=9606 GN=LPO PE=1 SV=2	PERL_HUMAN	LPO	80 kDa		unknown	23074	21592	0	28249	14162	0	0	23156	0
163	TRUE	Empty	Zinc-alpha-2-glycoprotein OS=Homo sapiens OX=9606 GN=AZGP1 PE=1 SV=2	ZA2G_HUMAN	AZGP1	34 kDa		unknown	33924	35633	33033	34007	33397	33753	15323	23152	19838
164	TRUE	Empty	Immunoglobulin heavy constant alpha 1 OS=Homo sapiens OX=9606 GN=IGHA1 PE=1 SV=2	IGHA1_HUMAN	IGHA1	38 kDa	TRUE	unknown	22684	24040	22757	27457	24685	24160	0	23106	20081
277.1	TRUE	Empty	Transforming protein RhoA OS=Homo sapiens OX=9606 GN=RHOA PE=1 SV=1	RHOA_HUMAN	RHOA	22 kDa	TRUE	unknown	0	0	0	0	0	0	0	23098	0
165	TRUE	Empty	Coagulation factor IX OS=Homo sapiens OX=9606 GN=F9 PE=1 SV=2	FA9_HUMAN	F9	52 kDa		unknown	0	0	0	0	0	0	0	23001	0
166	TRUE	Empty	Annexin A5 OS=Homo sapiens OX=9606 GN=ANXA5 PE=1 SV=2	ANXA5_HUMAN	ANXA5	36 kDa		unknown	0	0	0	0	0	0	21265	22976	13121
175.4	TRUE	Empty	Ras-related protein Rab-1B OS=Homo sapiens OX=9606 GN=RAB1B PE=1 SV=1	RAB1B_HUMAN	RAB1B	22 kDa	TRUE	unknown	0	0	0	0	0	0	0	22976	0
167	TRUE	Empty	Cluster of Tubulin alpha-1C chain OS=Homo sapiens OX=9606 GN=TUBA1C PE=1 SV=1 (TBA1C_HUMAN)	TBA1C_HUMAN [3]	TUBA1C	50 kDa	TRUE	unknown	0	0	0	0	0	0	10447	22863	0
168	TRUE	Empty	Prostatic acid phosphatase OS=Homo sapiens OX=9606 GN=ACPP PE=1 SV=3	PPAP_HUMAN	ACPP	45 kDa		unknown	0	0	0	0	0	0	0	22743	0
169	TRUE	Empty	Galectin-3-binding protein OS=Homo sapiens OX=9606 GN=LGALS3BP PE=1 SV=1	LG3BP_HUMAN	LGALS3BP	65 kDa		unknown	17660	22202	12480	16277	0	0	0	22685	0
134.7	TRUE	Empty	Keratin, type I cytoskeletal 18 OS=Homo sapiens OX=9606 GN=KRT18 PE=1 SV=2	K1C18_HUMAN	KRT18	48 kDa	TRUE	unknown	0	0	0	0	0	0	0	22679	0
170	TRUE	Empty	Neutral alpha-glucosidase AB OS=Homo sapiens OX=9606 GN=GANAB PE=1 SV=3	GANAB_HUMAN	GANAB	107 kDa		unknown	0	0	0	0	0	0	0	22677	0
171	TRUE	Empty	Cluster of Alpha-enolase OS=Homo sapiens OX=9606 GN=ENO1 PE=1 SV=2 (ENOA_HUMAN)	ENOA_HUMAN	ENO1	47 kDa	TRUE	unknown	14210	19797	0	14409	19317	0	9007.8	22632	11123
171.1	TRUE	Empty	Alpha-enolase OS=Homo sapiens OX=9606 GN=ENO1 PE=1 SV=2	ENOA_HUMAN	ENO1	47 kDa	TRUE	unknown	14210	19797	0	14409	19317	0	9007.8	22632	11123
172	TRUE	Empty	Cluster of Thrombospondin-1 OS=Homo sapiens OX=9606 GN=THBS1 PE=1 SV=2 (TSP1_HUMAN)	TSP1_HUMAN	THBS1	129 kDa	TRUE	unknown	19082	16808	22667	14300	22015	17002	0	22579	12687
172.1	TRUE	Empty	Thrombospondin-1 OS=Homo sapiens OX=9606 GN=THBS1 PE=1 SV=2	TSP1_HUMAN	THBS1	129 kDa	TRUE	unknown	19082	16808	22667	14300	22015	17002	0	22579	12687
173	TRUE	Empty	Cluster of Copine-3 OS=Homo sapiens OX=9606 GN=CPNE3 PE=1 SV=1 (CPNE3_HUMAN)	CPNE3_HUMAN	CPNE3	60 kDa	TRUE	unknown	0	0	0	0	0	0	13334	22527	0
173.1	TRUE	Empty	Copine-3 OS=Homo sapiens OX=9606 GN=CPNE3 PE=1 SV=1	CPNE3_HUMAN	CPNE3	60 kDa	TRUE	unknown	0	0	0	0	0	0	13334	22527	0
174	TRUE	Empty	Specifically androgen-regulated gene protein OS=Homo sapiens OX=9606 GN=SARG PE=1 SV=2	SARG_HUMAN	SARG	64 kDa		unknown	0	0	0	0	0	0	10854	22402	13081
175	TRUE	Empty	Cluster of Ras-related protein Rab-3D OS=Homo sapiens OX=9606 GN=RAB3D PE=1 SV=1 (RAB3D_HUMAN)	RAB3D_HUMAN [5]	RAB3D	24 kDa	TRUE	unknown	0	0	0	0	0	0	0	22326	0
176	TRUE	Empty	Serine protease HTRA1 OS=Homo sapiens OX=9606 GN=HTRA1 PE=1 SV=1	HTRA1_HUMAN	HTRA1	51 kDa		unknown	0	0	0	0	0	0	0	22241	0
177	TRUE	Empty	Calcium-binding protein 39 OS=Homo sapiens OX=9606 GN=CAB39 PE=1 SV=1	CAB39_HUMAN	CAB39	40 kDa	TRUE	unknown	0	0	0	0	0	0	0	22018	0
178	TRUE	Empty	Peroxiredoxin-4 OS=Homo sapiens OX=9606 GN=PRDX4 PE=1 SV=1	PRDX4_HUMAN	PRDX4	31 kDa	TRUE	unknown	0	0	0	0	0	0	0	22008	0
179	TRUE	Empty	Peroxiredoxin-2 OS=Homo sapiens OX=9606 GN=PRDX2 PE=1 SV=5	PRDX2_HUMAN	PRDX2	22 kDa	TRUE	unknown	0	21300	0	0	0	0	0	21842	0
180	TRUE	Empty	Peroxiredoxin-6 OS=Homo sapiens OX=9606 GN=PRDX6 PE=1 SV=3	PRDX6_HUMAN	PRDX6	25 kDa		unknown	0	0	0	0	0	0	0	21667	0
210.1	TRUE	Empty	ADP-ribosylation factor 5 OS=Homo sapiens OX=9606 GN=ARF5 PE=1 SV=2	ARF5_HUMAN	ARF5	21 kDa	TRUE	unknown	0	0	0	0	0	0	0	21661	0
195.1	TRUE	Empty	Annexin A8-like protein 1 OS=Homo sapiens OX=9606 GN=ANXA8L1 PE=2 SV=2	AXA81_HUMAN	ANXA8L1	37 kDa	TRUE	unknown	0	0	0	0	0	0	0	21577	9925.6
228.1	TRUE	Empty	Pregnancy zone protein OS=Homo sapiens OX=9606 GN=PZP PE=1 SV=4	PZP_HUMAN	PZP	164 kDa	TRUE	unknown	0	0	0	0	0	0	0	21521	0
181	TRUE	Empty	Ceruloplasmin OS=Homo sapiens OX=9606 GN=CP PE=1 SV=1	CERU_HUMAN	CP	122 kDa		unknown	23264	27121	27430	23202	26217	26988	12070	21466	17201
182	TRUE	Empty	C4b-binding protein alpha chain OS=Homo sapiens OX=9606 GN=C4BPA PE=1 SV=2	C4BPA_HUMAN	C4BPA	67 kDa		unknown	0	0	0	0	0	0	16041	21434	15786
183	TRUE	Empty	Metalloproteinase inhibitor 1 OS=Homo sapiens OX=9606 GN=TIMP1 PE=1 SV=1	TIMP1_HUMAN	TIMP1	23 kDa		unknown	30754	30073	27762	30254	28988	27127	0	21409	0
184	TRUE	Empty	Protein NDRG1 OS=Homo sapiens OX=9606 GN=NDRG1 PE=1 SV=1	NDRG1_HUMAN	NDRG1	43 kDa		unknown	0	0	0	0	0	0	0	21302	0
90.2	TRUE	Empty	Alpha-actinin-1 OS=Homo sapiens OX=9606 GN=ACTN1 PE=1 SV=2	ACTN1_HUMAN	ACTN1	103 kDa	TRUE	unknown	0	0	0	0	0	0	0	21176	0
185	TRUE	Empty	Cluster of Cytoplasmic FMR1-interacting protein 1 OS=Homo sapiens OX=9606 GN=CYFIP1 PE=1 SV=1 (CYFP1_HUMAN)	CYFP1_HUMAN	CYFIP1	145 kDa	TRUE	unknown	0	0	0	0	0	0	0	21145	0
185.1	TRUE	Empty	Cytoplasmic FMR1-interacting protein 1 OS=Homo sapiens OX=9606 GN=CYFIP1 PE=1 SV=1	CYFP1_HUMAN	CYFIP1	145 kDa	TRUE	unknown	0	0	0	0	0	0	0	21145	0
195.2	TRUE	Empty	Annexin A8 OS=Homo sapiens OX=9606 GN=ANXA8 PE=1 SV=3	ANXA8_HUMAN	ANXA8	37 kDa	TRUE	unknown	0	0	0	0	0	0	0	21114	0
186	TRUE	Empty	Leukotriene A-4 hydrolase OS=Homo sapiens OX=9606 GN=LTA4H PE=1 SV=2	LKHA4_HUMAN	LTA4H	69 kDa		unknown	0	0	0	0	0	0	0	21015	0
187	TRUE	Empty	Protein AMBP OS=Homo sapiens OX=9606 GN=AMBP PE=1 SV=1	AMBP_HUMAN	AMBP	39 kDa		unknown	22115	24490	24328	20985	21976	21348	9814.1	20977	12996
188	TRUE	Empty	Prominin-2 OS=Homo sapiens OX=9606 GN=PROM2 PE=1 SV=1	PROM2_HUMAN	PROM2	92 kDa		unknown	0	0	0	0	0	0	11694	20944	0
189	TRUE	Empty	Endoplasmic reticulum chaperone BiP OS=Homo sapiens OX=9606 GN=HSPA5 PE=1 SV=2	BIP_HUMAN	HSPA5	72 kDa	TRUE	unknown	0	0	0	0	0	0	0	20839	0
190	TRUE	Empty	Monocyte differentiation antigen CD14 OS=Homo sapiens OX=9606 GN=CD14 PE=1 SV=2	CD14_HUMAN	CD14	40 kDa		unknown	13467	13796	13427	10256	10358	13356	0	20801	0
191	TRUE	Empty	Desmoglein-3 OS=Homo sapiens OX=9606 GN=DSG3 PE=1 SV=2	DSG3_HUMAN	DSG3	108 kDa	TRUE	unknown	0	0	0	0	0	0	0	20646	0
192	TRUE	Empty	Transaldolase OS=Homo sapiens OX=9606 GN=TALDO1 PE=1 SV=2	TALDO_HUMAN	TALDO1	38 kDa		unknown	0	0	0	0	0	0	0	20596	0
193	TRUE	Empty	Ras-related protein R-Ras OS=Homo sapiens OX=9606 GN=RRAS PE=1 SV=1	RRAS_HUMAN	RRAS	23 kDa	TRUE	unknown	0	0	0	0	0	0	0	20595	0
194	TRUE	Empty	Cluster of Moesin OS=Homo sapiens OX=9606 GN=MSN PE=1 SV=3 (MOES_HUMAN)	MOES_HUMAN [3]	MSN	68 kDa	TRUE	unknown	0	23888	0	0	19782	0	21762	20578	21954
195	TRUE	Empty	Cluster of Annexin A8-like protein 1 OS=Homo sapiens OX=9606 GN=ANXA8L1 PE=2 SV=2 (AXA81_HUMAN)	AXA81_HUMAN [2]	ANXA8L1	37 kDa	TRUE	unknown	0	0	0	0	0	0	0	20550	9925.6
196	TRUE	Empty	IgGFc-binding protein OS=Homo sapiens OX=9606 GN=FCGBP PE=1 SV=3	FCGBP_HUMAN	FCGBP	572 kDa		unknown	0	15702	0	0	0	0	0	20527	10179
197	TRUE	Empty	Inter-alpha-trypsin inhibitor heavy chain H1 OS=Homo sapiens OX=9606 GN=ITIH1 PE=1 SV=3	ITIH1_HUMAN	ITIH1	101 kDa		unknown	22647	29776	21332	24216	25258	23548	0	20526	0
198	TRUE	Empty	Cluster of Carcinoembryonic antigen-related cell adhesion molecule 5 OS=Homo sapiens OX=9606 GN=CEACAM5 PE=1 SV=3 (CEAM5_HUMAN)	CEAM5_HUMAN [2]	CEACAM5	77 kDa	TRUE	unknown	0	0	0	0	0	0	10461	20519	0
199	TRUE	Empty	Ras-related protein Rab-11A OS=Homo sapiens OX=9606 GN=RAB11A PE=1 SV=3	RB11A_HUMAN (+1)	RAB11A	24 kDa		unknown	0	0	0	0	0	0	0	20508	0
161.3	TRUE	Empty	Immunoglobulin heavy variable 3-49 OS=Homo sapiens OX=9606 GN=IGHV3-49 PE=3 SV=1	HV349_HUMAN	IGHV3-49	13 kDa	TRUE	unknown	23973	0	0	0	0	0	0	20464	0
200	TRUE	Empty	Glutathione peroxidase 3 OS=Homo sapiens OX=9606 GN=GPX3 PE=1 SV=2	GPX3_HUMAN	GPX3	26 kDa		unknown	0	0	0	0	0	0	0	20413	0
201	TRUE	Empty	Serum albumin OS=Homo sapiens OX=9606 GN=ALB PE=1 SV=2	ALBU_HUMAN	ALB	69 kDa		unknown	23784	22024	22869	23469	23630	23982	15485	20374	37961
202	TRUE	Empty	UTP--glucose-1-phosphate uridylyltransferase OS=Homo sapiens OX=9606 GN=UGP2 PE=1 SV=5	UGPA_HUMAN	UGP2	57 kDa		unknown	0	0	0	0	0	0	0	20285	0
203	TRUE	Empty	BRO1 domain-containing protein BROX OS=Homo sapiens OX=9606 GN=BROX PE=1 SV=1	BROX_HUMAN	BROX	46 kDa		unknown	0	0	0	0	0	0	0	20284	14216
204	TRUE	Empty	Triosephosphate isomerase OS=Homo sapiens OX=9606 GN=TPI1 PE=1 SV=3	TPIS_HUMAN	TPI1	31 kDa		unknown	0	11459	0	0	0	0	0	20195	0
205	TRUE	Empty	Beta-2-glycoprotein 1 OS=Homo sapiens OX=9606 GN=APOH PE=1 SV=3	APOH_HUMAN	APOH	38 kDa		unknown	31643	22796	21371	26621	24899	24401	12975	20183	11516
206	TRUE	Empty	Laminin subunit gamma-2 OS=Homo sapiens OX=9606 GN=LAMC2 PE=1 SV=2	LAMC2_HUMAN	LAMC2	131 kDa		unknown	0	0	0	0	0	0	0	20167	0
314.1	TRUE	Empty	14-3-3 protein epsilon OS=Homo sapiens OX=9606 GN=YWHAE PE=1 SV=1	1433E_HUMAN	YWHAE	29 kDa	TRUE	unknown	0	0	0	0	0	0	0	20086	0
210.2	TRUE	Empty	ADP-ribosylation factor 3 OS=Homo sapiens OX=9606 GN=ARF3 PE=1 SV=2	ARF3_HUMAN	ARF3	21 kDa	TRUE	unknown	0	0	0	0	0	0	0	19924	0
210.3	TRUE	Empty	ADP-ribosylation factor 4 OS=Homo sapiens OX=9606 GN=ARF4 PE=1 SV=3	ARF4_HUMAN	ARF4	21 kDa	TRUE	unknown	0	0	0	0	0	0	0	19916	0
175.5	TRUE	Empty	Ras-related protein Rab-3D OS=Homo sapiens OX=9606 GN=RAB3D PE=1 SV=1	RAB3D_HUMAN	RAB3D	24 kDa	TRUE	unknown	0	0	0	0	0	0	0	19832	0
207	TRUE	Empty	T-complex protein 1 subunit theta OS=Homo sapiens OX=9606 GN=CCT8 PE=1 SV=4	TCPQ_HUMAN	CCT8	60 kDa		unknown	0	0	0	0	0	0	0	19823	0
208	TRUE	Empty	Serpin B5 OS=Homo sapiens OX=9606 GN=SERPINB5 PE=1 SV=2	SPB5_HUMAN	SERPINB5	42 kDa		unknown	0	0	0	0	0	0	0	19812	0
209	TRUE	Empty	Calcium-activated chloride channel regulator 4 OS=Homo sapiens OX=9606 GN=CLCA4 PE=1 SV=2	CLCA4_HUMAN	CLCA4	101 kDa		unknown	0	0	0	0	0	0	0	19748	0
210	TRUE	Empty	Cluster of ADP-ribosylation factor 4 OS=Homo sapiens OX=9606 GN=ARF4 PE=1 SV=3 (ARF4_HUMAN)	ARF4_HUMAN [3]	ARF4	21 kDa	TRUE	unknown	0	0	0	0	0	0	0	19691	0
211	TRUE	Empty	BPI fold-containing family B member 3 OS=Homo sapiens OX=9606 GN=BPIFB3 PE=2 SV=2	BPIB3_HUMAN	BPIFB3	50 kDa		unknown	0	0	0	0	0	0	0	19625	0
212	TRUE	Empty	Phosphoglucomutase-2 OS=Homo sapiens OX=9606 GN=PGM2 PE=1 SV=4	PGM2_HUMAN	PGM2	68 kDa		unknown	0	0	0	0	0	0	0	19601	0
213	TRUE	Empty	Complement factor B OS=Homo sapiens OX=9606 GN=CFB PE=1 SV=2	CFAB_HUMAN	CFB	86 kDa		unknown	20856	20565	17707	17918	24733	22951	10818	19392	16267
314.2	TRUE	Empty	14-3-3 protein sigma OS=Homo sapiens OX=9606 GN=SFN PE=1 SV=1	1433S_HUMAN	SFN	28 kDa	TRUE	unknown	0	0	0	0	0	0	0	19382	0
214	TRUE	Empty	Phospholipid transfer protein OS=Homo sapiens OX=9606 GN=PLTP PE=1 SV=1	PLTP_HUMAN	PLTP	55 kDa		unknown	0	0	0	0	0	0	0	19380	20775
215	TRUE	Empty	Profilin-1 OS=Homo sapiens OX=9606 GN=PFN1 PE=1 SV=2	PROF1_HUMAN	PFN1	15 kDa		unknown	26943	24972	0	26568	29275	0	0	19377	0
216	TRUE	Empty	Actin-related protein 2/3 complex subunit 1B OS=Homo sapiens OX=9606 GN=ARPC1B PE=1 SV=3	ARC1B_HUMAN	ARPC1B	41 kDa	TRUE	unknown	0	0	0	0	0	0	0	19350	0
217	TRUE	Empty	Serum paraoxonase/arylesterase 1 OS=Homo sapiens OX=9606 GN=PON1 PE=1 SV=3	PON1_HUMAN	PON1	40 kDa		unknown	0	0	0	0	0	0	0	19314	0
218	TRUE	Empty	Unconventional myosin-Ic OS=Homo sapiens OX=9606 GN=MYO1C PE=1 SV=4	MYO1C_HUMAN	MYO1C	122 kDa		unknown	0	0	0	0	0	0	7563.5	19224	0
219	TRUE	Empty	Basement membrane-specific heparan sulfate proteoglycan core protein OS=Homo sapiens OX=9606 GN=HSPG2 PE=1 SV=4	PGBM_HUMAN	HSPG2	469 kDa		unknown	40039	26690	32945	26249	33476	37113	0	19196	0
220	TRUE	Empty	Cytosolic non-specific dipeptidase OS=Homo sapiens OX=9606 GN=CNDP2 PE=1 SV=2	CNDP2_HUMAN	CNDP2	53 kDa		unknown	0	0	0	0	0	0	0	19194	0
222	TRUE	Empty	Protein-glutamine gamma-glutamyltransferase E OS=Homo sapiens OX=9606 GN=TGM3 PE=1 SV=4	TGM3_HUMAN	TGM3	77 kDa		unknown	8716.6	10192	11068	11594	0	0	16536	19188	0
221	TRUE	Empty	Arrestin domain-containing protein 1 OS=Homo sapiens OX=9606 GN=ARRDC1 PE=1 SV=1	ARRD1_HUMAN	ARRDC1	46 kDa		unknown	0	0	0	0	0	0	0	19188	0
223	TRUE	Empty	Fibulin-1 OS=Homo sapiens OX=9606 GN=FBLN1 PE=1 SV=4	FBLN1_HUMAN	FBLN1	77 kDa		unknown	0	16344	0	0	0	0	0	19162	0
224	TRUE	Empty	Procollagen-lysine,2-oxoglutarate 5-dioxygenase 1 OS=Homo sapiens OX=9606 GN=PLOD1 PE=1 SV=2	PLOD1_HUMAN	PLOD1	84 kDa		unknown	0	0	0	0	0	0	0	19146	0
225	TRUE	Empty	Cornulin OS=Homo sapiens OX=9606 GN=CRNN PE=1 SV=1	CRNN_HUMAN	CRNN	54 kDa		unknown	15957	12972	0	11945	10462	0	0	19116	0
229.1	TRUE	Empty	Immunoglobulin mu heavy chain OS=Homo sapiens OX=9606 PE=1 SV=2	IGM_HUMAN		63 kDa	TRUE	unknown	0	0	0	0	0	0	0	19069	0
198.2	TRUE	Empty	Carcinoembryonic antigen-related cell adhesion molecule 1 OS=Homo sapiens OX=9606 GN=CEACAM1 PE=1 SV=2	CEAM1_HUMAN	CEACAM1	58 kDa	TRUE	unknown	0	0	0	0	0	0	0	18999	0
226	TRUE	Empty	Carbonyl reductase [NADPH] 1 OS=Homo sapiens OX=9606 GN=CBR1 PE=1 SV=3	CBR1_HUMAN	CBR1	30 kDa		unknown	0	0	0	0	0	0	0	18962	0
227	TRUE	Empty	Apolipoprotein E OS=Homo sapiens OX=9606 GN=APOE PE=1 SV=1	APOE_HUMAN	APOE	36 kDa		unknown	0	0	0	0	0	0	0	18940	0
228	TRUE	Empty	Cluster of Alpha-2-macroglobulin OS=Homo sapiens OX=9606 GN=A2M PE=1 SV=3 (A2MG_HUMAN)	A2MG_HUMAN [2]	A2M	163 kDa	TRUE	unknown	10648	16873	13047	12696	14894	10798	7770.7	18930	7179.6
229	TRUE	Empty	Cluster of Immunoglobulin heavy constant mu OS=Homo sapiens OX=9606 GN=IGHM PE=1 SV=4 (IGHM_HUMAN)	IGHM_HUMAN [2]	IGHM	49 kDa	TRUE	unknown	0	0	0	0	0	0	0	18901	0
230	TRUE	Empty	Rho GDP-dissociation inhibitor 1 OS=Homo sapiens OX=9606 GN=ARHGDIA PE=1 SV=3	GDIR1_HUMAN	ARHGDIA	23 kDa		unknown	0	0	0	0	0	0	0	18825	0
229.2	TRUE	Empty	Immunoglobulin heavy constant mu OS=Homo sapiens OX=9606 GN=IGHM PE=1 SV=4	IGHM_HUMAN	IGHM	49 kDa	TRUE	unknown	0	0	0	0	0	0	0	18791	0
228.2	TRUE	Empty	Alpha-2-macroglobulin OS=Homo sapiens OX=9606 GN=A2M PE=1 SV=3	A2MG_HUMAN	A2M	163 kDa	TRUE	unknown	10648	16873	13047	12696	14894	10798	7770.7	18775	7179.6
231	TRUE	Empty	Syntenin-1 OS=Homo sapiens OX=9606 GN=SDCBP PE=1 SV=1	SDCB1_HUMAN	SDCBP	32 kDa		unknown	8124.8	0	0	0	0	0	20246	18769	23074
232	TRUE	Empty	STE20-like serine/threonine-protein kinase OS=Homo sapiens OX=9606 GN=SLK PE=1 SV=1	SLK_HUMAN	SLK	143 kDa		unknown	0	0	0	0	0	0	0	18686	0
233	TRUE	Empty	Retinal dehydrogenase 1 OS=Homo sapiens OX=9606 GN=ALDH1A1 PE=1 SV=2	AL1A1_HUMAN	ALDH1A1	55 kDa		unknown	0	0	0	0	0	0	0	18673	0
234	TRUE	Empty	Complement component C8 beta chain OS=Homo sapiens OX=9606 GN=C8B PE=1 SV=3	CO8B_HUMAN	C8B	67 kDa		unknown	24495	23847	10237	0	21014	0	0	18610	16857
235	TRUE	Empty	Cell division control protein 42 homolog OS=Homo sapiens OX=9606 GN=CDC42 PE=1 SV=2	CDC42_HUMAN	CDC42	21 kDa	TRUE	unknown	0	0	0	0	0	0	0	18554	12334
236	TRUE	Empty	Insulin-like growth factor-binding protein 1 OS=Homo sapiens OX=9606 GN=IGFBP1 PE=1 SV=1	IBP1_HUMAN	IGFBP1	28 kDa		unknown	25306	38000	20288	29029	34329	22705	0	18532	0
237	TRUE	Empty	Mannosyl-oligosaccharide 1,2-alpha-mannosidase IA OS=Homo sapiens OX=9606 GN=MAN1A1 PE=1 SV=3	MA1A1_HUMAN	MAN1A1	73 kDa		unknown	0	0	0	0	0	0	0	18447	0
238	TRUE	Empty	Sodium-dependent phosphate transport protein 2B OS=Homo sapiens OX=9606 GN=SLC34A2 PE=1 SV=3	NPT2B_HUMAN	SLC34A2	76 kDa		unknown	0	0	0	0	0	0	0	18410	31086
369.2	TRUE	Empty	Guanine nucleotide-binding protein G(k) subunit alpha OS=Homo sapiens OX=9606 GN=GNAI3 PE=1 SV=3	GNAI3_HUMAN	GNAI3	41 kDa	TRUE	unknown	0	0	0	0	0	0	0	18404	0
239	TRUE	Empty	4-trimethylaminobutyraldehyde dehydrogenase OS=Homo sapiens OX=9606 GN=ALDH9A1 PE=1 SV=3	AL9A1_HUMAN	ALDH9A1	54 kDa		unknown	0	0	0	0	0	0	0	18397	0
240	TRUE	Empty	Alkaline phosphatase, placental type OS=Homo sapiens OX=9606 GN=ALPP PE=1 SV=2	PPB1_HUMAN	ALPP	58 kDa		unknown	0	0	0	0	0	0	0	18375	0
241	TRUE	Empty	EH domain-containing protein 4 OS=Homo sapiens OX=9606 GN=EHD4 PE=1 SV=1	EHD4_HUMAN	EHD4	61 kDa	TRUE	unknown	0	0	0	0	0	0	14901	18330	0
242	TRUE	Empty	Uroplakin-1b OS=Homo sapiens OX=9606 GN=UPK1B PE=1 SV=5	UPK1B_HUMAN	UPK1B	30 kDa		unknown	0	0	0	0	0	0	0	18311	0
243	TRUE	Empty	Receptor-type tyrosine-protein phosphatase eta OS=Homo sapiens OX=9606 GN=PTPRJ PE=1 SV=3	PTPRJ_HUMAN	PTPRJ	146 kDa		unknown	0	0	0	0	0	0	0	18295	0
244	TRUE	Empty	Laminin subunit alpha-3 OS=Homo sapiens OX=9606 GN=LAMA3 PE=1 SV=2	LAMA3_HUMAN	LAMA3	367 kDa		unknown	0	0	0	0	0	0	0	18288	0
245	TRUE	Empty	Glutathione hydrolase 1 proenzyme OS=Homo sapiens OX=9606 GN=GGT1 PE=1 SV=2	GGT1_HUMAN	GGT1	61 kDa		unknown	0	0	0	0	0	0	0	18287	0
246	TRUE	Empty	Catalase OS=Homo sapiens OX=9606 GN=CAT PE=1 SV=3	CATA_HUMAN	CAT	60 kDa		unknown	0	0	0	0	0	0	13600	18237	0
247	TRUE	Empty	Fructose-bisphosphate aldolase C OS=Homo sapiens OX=9606 GN=ALDOC PE=1 SV=2	ALDOC_HUMAN	ALDOC	39 kDa	TRUE	unknown	0	0	0	0	0	0	0	18226	0
248	TRUE	Empty	Ras-related protein Rab-5C OS=Homo sapiens OX=9606 GN=RAB5C PE=1 SV=2	RAB5C_HUMAN	RAB5C	23 kDa	TRUE	unknown	0	0	0	0	0	0	0	18187	0
249	TRUE	Empty	Isthmin-2 OS=Homo sapiens OX=9606 GN=ISM2 PE=2 SV=1	ISM2_HUMAN	ISM2	64 kDa		unknown	0	13829	0	0	0	0	0	18129	0
250	TRUE	Empty	Creatine kinase B-type OS=Homo sapiens OX=9606 GN=CKB PE=1 SV=1	KCRB_HUMAN	CKB	43 kDa		unknown	0	0	0	0	0	0	0	18052	0
251	TRUE	Empty	Complement component C7 OS=Homo sapiens OX=9606 GN=C7 PE=1 SV=2	CO7_HUMAN	C7	94 kDa		unknown	12406	9403.2	10639	0	11665	11124	0	18047	0
277.2	TRUE	Empty	Rho-related GTP-binding protein RhoC OS=Homo sapiens OX=9606 GN=RHOC PE=1 SV=1	RHOC_HUMAN	RHOC	22 kDa	TRUE	unknown	0	0	0	0	0	0	0	17910	0
252	TRUE	Empty	Cytochrome b reductase 1 OS=Homo sapiens OX=9606 GN=CYBRD1 PE=1 SV=1	CYBR1_HUMAN	CYBRD1	32 kDa		unknown	0	0	0	0	0	0	0	17897	0
253	TRUE	Empty	Protein Z-dependent protease inhibitor OS=Homo sapiens OX=9606 GN=SERPINA10 PE=1 SV=1	ZPI_HUMAN	SERPINA10	51 kDa		unknown	0	0	0	0	0	0	0	17858	0
254	TRUE	Empty	Poly(rC)-binding protein 1 OS=Homo sapiens OX=9606 GN=PCBP1 PE=1 SV=2	PCBP1_HUMAN	PCBP1	37 kDa	TRUE	unknown	0	0	0	0	0	0	0	17836	0
255	TRUE	Empty	FRAS1-related extracellular matrix protein 2 OS=Homo sapiens OX=9606 GN=FREM2 PE=1 SV=2	FREM2_HUMAN	FREM2	351 kDa		unknown	0	0	0	0	0	0	0	17802	0
256	TRUE	Empty	Phospholipase D3 OS=Homo sapiens OX=9606 GN=PLD3 PE=1 SV=1	PLD3_HUMAN	PLD3	55 kDa		unknown	0	0	0	0	0	0	0	17799	0
257	TRUE	Empty	Actin-related protein 2 OS=Homo sapiens OX=9606 GN=ACTR2 PE=1 SV=1	ARP2_HUMAN	ACTR2	45 kDa		unknown	0	0	0	0	0	0	0	17747	0
258	TRUE	Empty	Perilipin-3 OS=Homo sapiens OX=9606 GN=PLIN3 PE=1 SV=3	PLIN3_HUMAN	PLIN3	47 kDa		unknown	0	0	0	0	0	0	0	17661	0
259	TRUE	Empty	Vacuolar protein sorting-associated protein VTA1 homolog OS=Homo sapiens OX=9606 GN=VTA1 PE=1 SV=1	VTA1_HUMAN	VTA1	34 kDa		unknown	0	0	0	0	0	0	0	17615	0
314.3	TRUE	Empty	14-3-3 protein beta/alpha OS=Homo sapiens OX=9606 GN=YWHAB PE=1 SV=3	1433B_HUMAN	YWHAB	28 kDa	TRUE	unknown	0	0	0	0	0	0	0	17591	0
260	TRUE	Empty	Protein-glutamine gamma-glutamyltransferase 2 OS=Homo sapiens OX=9606 GN=TGM2 PE=1 SV=2	TGM2_HUMAN	TGM2	77 kDa		unknown	0	0	0	0	0	0	0	17544	0
261	TRUE	Empty	Proteasome activator complex subunit 1 OS=Homo sapiens OX=9606 GN=PSME1 PE=1 SV=1	PSME1_HUMAN	PSME1	29 kDa		unknown	0	0	0	0	0	0	0	17512	0
314.4	TRUE	Empty	14-3-3 protein zeta/delta OS=Homo sapiens OX=9606 GN=YWHAZ PE=1 SV=1	1433Z_HUMAN	YWHAZ	28 kDa	TRUE	unknown	8833	0	0	0	8815.5	0	0	17457	12394
262	TRUE	Empty	Annexin A7 OS=Homo sapiens OX=9606 GN=ANXA7 PE=1 SV=3	ANXA7_HUMAN	ANXA7	53 kDa		unknown	0	0	0	0	0	0	0	17454	0
263	TRUE	Empty	Spectrin beta chain, non-erythrocytic 1 OS=Homo sapiens OX=9606 GN=SPTBN1 PE=1 SV=2	SPTB2_HUMAN	SPTBN1	275 kDa	TRUE	unknown	0	0	0	0	0	0	0	17453	0
264	TRUE	Empty	Glycogen phosphorylase, brain form OS=Homo sapiens OX=9606 GN=PYGB PE=1 SV=5	PYGB_HUMAN	PYGB	97 kDa	TRUE	unknown	0	0	0	0	0	0	0	17428	0
265	TRUE	Empty	IST1 homolog OS=Homo sapiens OX=9606 GN=IST1 PE=1 SV=1	IST1_HUMAN	IST1	40 kDa		unknown	0	0	0	0	0	0	30623	17320	18519
266	TRUE	Empty	Coagulation factor XIII A chain OS=Homo sapiens OX=9606 GN=F13A1 PE=1 SV=4	F13A_HUMAN	F13A1	83 kDa		unknown	0	0	0	0	0	0	0	17259	0
267	TRUE	Empty	Sorting nexin-18 OS=Homo sapiens OX=9606 GN=SNX18 PE=1 SV=2	SNX18_HUMAN	SNX18	69 kDa		unknown	0	0	0	0	0	0	0	17258	0
268	TRUE	Empty	Cluster of Actin-related protein 3 OS=Homo sapiens OX=9606 GN=ACTR3 PE=1 SV=3 (ARP3_HUMAN)	ARP3_HUMAN	ACTR3	47 kDa	TRUE	unknown	0	0	0	0	0	0	0	17257	0
268.1	TRUE	Empty	Actin-related protein 3 OS=Homo sapiens OX=9606 GN=ACTR3 PE=1 SV=3	ARP3_HUMAN	ACTR3	47 kDa	TRUE	unknown	0	0	0	0	0	0	0	17257	0
269	TRUE	Empty	Chloride intracellular channel protein 1 OS=Homo sapiens OX=9606 GN=CLIC1 PE=1 SV=4	CLIC1_HUMAN	CLIC1	27 kDa		unknown	0	0	0	0	0	0	0	17099	0
270	TRUE	Empty	Lactotransferrin OS=Homo sapiens OX=9606 GN=LTF PE=1 SV=6	TRFL_HUMAN	LTF	78 kDa	TRUE	unknown	24847	24744	23472	20667	20325	18658	10470	17086	13246
271	TRUE	Empty	Complement C1r subcomponent OS=Homo sapiens OX=9606 GN=C1R PE=1 SV=2	C1R_HUMAN	C1R	80 kDa		unknown	0	0	19433	0	0	0	0	17070	0
272	TRUE	Empty	Isocitrate dehydrogenase [NADP] cytoplasmic OS=Homo sapiens OX=9606 GN=IDH1 PE=1 SV=2	IDHC_HUMAN	IDH1	47 kDa		unknown	0	0	0	0	0	0	0	17052	0
273	TRUE	Empty	Polymeric immunoglobulin receptor OS=Homo sapiens OX=9606 GN=PIGR PE=1 SV=4	PIGR_HUMAN	PIGR	83 kDa		unknown	20925	23991	23515	23281	25008	20697	15288	17028	11483
274	TRUE	Empty	Cluster of Clathrin heavy chain 1 OS=Homo sapiens OX=9606 GN=CLTC PE=1 SV=5 (CLH1_HUMAN)	CLH1_HUMAN	CLTC	192 kDa	TRUE	unknown	0	0	0	0	0	0	0	16995	0
274.1	TRUE	Empty	Clathrin heavy chain 1 OS=Homo sapiens OX=9606 GN=CLTC PE=1 SV=5	CLH1_HUMAN	CLTC	192 kDa	TRUE	unknown	0	0	0	0	0	0	0	16995	0
275	TRUE	Empty	Ribonuclease inhibitor OS=Homo sapiens OX=9606 GN=RNH1 PE=1 SV=2	RINI_HUMAN	RNH1	50 kDa		unknown	0	0	0	0	0	0	0	16986	0
276	TRUE	Empty	Collagen alpha-1(V) chain OS=Homo sapiens OX=9606 GN=COL5A1 PE=1 SV=3	CO5A1_HUMAN	COL5A1	184 kDa		unknown	11036	7961.6	6722.6	7407.1	0	12330	0	16971	0
277	TRUE	Empty	Cluster of Transforming protein RhoA OS=Homo sapiens OX=9606 GN=RHOA PE=1 SV=1 (RHOA_HUMAN)	RHOA_HUMAN [2]	RHOA	22 kDa	TRUE	unknown	0	0	0	0	0	0	0	16932	0
278	TRUE	Empty	Cluster of Hsc70-interacting protein OS=Homo sapiens OX=9606 GN=ST13 PE=1 SV=2 (F10A1_HUMAN)	F10A1_HUMAN	ST13	41 kDa	TRUE	unknown	0	0	0	0	0	0	0	16917	0
278.1	TRUE	Empty	Hsc70-interacting protein OS=Homo sapiens OX=9606 GN=ST13 PE=1 SV=2	F10A1_HUMAN	ST13	41 kDa	TRUE	unknown	0	0	0	0	0	0	0	16917	0
279	TRUE	Empty	Guanylate-binding protein 6 OS=Homo sapiens OX=9606 GN=GBP6 PE=2 SV=1	GBP6_HUMAN	GBP6	72 kDa	TRUE	unknown	0	0	0	0	0	0	0	16914	0
280	TRUE	Empty	Inter-alpha-trypsin inhibitor heavy chain H4 OS=Homo sapiens OX=9606 GN=ITIH4 PE=1 SV=4	ITIH4_HUMAN	ITIH4	103 kDa		unknown	18478	21778	17654	21439	16984	20178	0	16905	0
281	TRUE	Empty	UDP-glucose 6-dehydrogenase OS=Homo sapiens OX=9606 GN=UGDH PE=1 SV=1	UGDH_HUMAN	UGDH	55 kDa		unknown	0	0	0	0	0	0	0	16902	0
282	TRUE	Empty	F-actin-capping protein subunit beta OS=Homo sapiens OX=9606 GN=CAPZB PE=1 SV=4	CAPZB_HUMAN	CAPZB	31 kDa		unknown	0	0	0	0	0	0	0	16880	0
283	TRUE	Empty	Complement component C6 OS=Homo sapiens OX=9606 GN=C6 PE=1 SV=3	CO6_HUMAN	C6	105 kDa		unknown	12150	17734	11225	6400.1	24627	0	0	16769	0
284	TRUE	Empty	Protein S100-A9 OS=Homo sapiens OX=9606 GN=S100A9 PE=1 SV=1	S10A9_HUMAN	S100A9	13 kDa		unknown	29631	32114	0	33156	32751	0	32030	16681	0
285	TRUE	Empty	Ras-related protein Rab-27B OS=Homo sapiens OX=9606 GN=RAB27B PE=1 SV=4	RB27B_HUMAN	RAB27B	25 kDa	TRUE	unknown	0	0	0	0	0	0	0	16680	0
286	TRUE	Empty	Beta-1,4-galactosyltransferase 1 OS=Homo sapiens OX=9606 GN=B4GALT1 PE=1 SV=5	B4GT1_HUMAN	B4GALT1	44 kDa		unknown	0	0	0	0	0	0	0	16640	0
287	TRUE	Empty	Complement C1q subcomponent subunit C OS=Homo sapiens OX=9606 GN=C1QC PE=1 SV=3	C1QC_HUMAN	C1QC	26 kDa		unknown	0	0	0	0	0	0	0	16620	0
288	TRUE	Empty	Plastin-2 OS=Homo sapiens OX=9606 GN=LCP1 PE=1 SV=6	PLSL_HUMAN	LCP1	70 kDa	TRUE	unknown	8934.5	0	0	11493	0	0	0	16557	0
289	TRUE	Empty	Heat shock protein beta-1 OS=Homo sapiens OX=9606 GN=HSPB1 PE=1 SV=2	HSPB1_HUMAN	HSPB1	23 kDa		unknown	12883	12290	0	0	0	0	15207	16285	0
290	TRUE	Empty	Myosin-9 OS=Homo sapiens OX=9606 GN=MYH9 PE=1 SV=4	MYH9_HUMAN	MYH9	227 kDa	TRUE	unknown	0	0	0	0	0	0	0	16253	0
291	TRUE	Empty	Sulfhydryl oxidase 1 OS=Homo sapiens OX=9606 GN=QSOX1 PE=1 SV=3	QSOX1_HUMAN	QSOX1	83 kDa		unknown	15857	26545	18764	13354	21211	17943	0	16178	0
292	TRUE	Empty	Chloride intracellular channel protein 5 OS=Homo sapiens OX=9606 GN=CLIC5 PE=1 SV=3	CLIC5_HUMAN	CLIC5	47 kDa	TRUE	unknown	0	0	0	0	0	0	11185	16168	11634
293	TRUE	Empty	Interleukin-1 receptor antagonist protein OS=Homo sapiens OX=9606 GN=IL1RN PE=1 SV=1	IL1RA_HUMAN	IL1RN	20 kDa		unknown	0	0	0	0	19555	0	0	16162	0
294	TRUE	Empty	Alpha-2-HS-glycoprotein OS=Homo sapiens OX=9606 GN=AHSG PE=1 SV=2	FETUA_HUMAN	AHSG	39 kDa		unknown	28137	34671	35687	30694	34179	25167	0	16114	26416
295	TRUE	Empty	Calpain-2 catalytic subunit OS=Homo sapiens OX=9606 GN=CAPN2 PE=1 SV=6	CAN2_HUMAN	CAPN2	80 kDa		unknown	0	0	0	0	0	0	0	16083	0
296	TRUE	Empty	Antithrombin-III OS=Homo sapiens OX=9606 GN=SERPINC1 PE=1 SV=1	ANT3_HUMAN	SERPINC1	53 kDa		unknown	25834	23436	24556	24580	24262	25985	9016	16016	11812
297	TRUE	Empty	WD repeat-containing protein 1 OS=Homo sapiens OX=9606 GN=WDR1 PE=1 SV=4	WDR1_HUMAN	WDR1	66 kDa		unknown	0	0	0	0	0	0	0	16010	0
298	TRUE	Empty	Tripartite motif-containing protein 29 OS=Homo sapiens OX=9606 GN=TRIM29 PE=1 SV=2	TRI29_HUMAN	TRIM29	66 kDa		unknown	0	0	0	0	0	0	0	15986	0
299	TRUE	Empty	Protein kinase C and casein kinase substrate in neurons protein 3 OS=Homo sapiens OX=9606 GN=PACSIN3 PE=1 SV=2	PACN3_HUMAN	PACSIN3	48 kDa		unknown	0	0	0	0	0	0	0	15977	0
300	TRUE	Empty	Ammonium transporter Rh type C OS=Homo sapiens OX=9606 GN=RHCG PE=1 SV=1	RHCG_HUMAN	RHCG	53 kDa		unknown	0	0	0	0	0	0	0	15962	0
301	TRUE	Empty	ERO1-like protein alpha OS=Homo sapiens OX=9606 GN=ERO1A PE=1 SV=2	ERO1A_HUMAN	ERO1A	54 kDa	TRUE	unknown	0	0	0	0	0	0	0	15945	0
302	TRUE	Empty	Disintegrin and metalloproteinase domain-containing protein 12 OS=Homo sapiens OX=9606 GN=ADAM12 PE=1 SV=3	ADA12_HUMAN	ADAM12	100 kDa		unknown	0	0	0	0	0	0	0	15890	0
303	TRUE	Empty	Tryptophan--tRNA ligase, cytoplasmic OS=Homo sapiens OX=9606 GN=WARS PE=1 SV=2	SYWC_HUMAN	WARS	53 kDa		unknown	0	0	0	0	0	0	0	15888	0
304	TRUE	Empty	Guanine nucleotide-binding protein G(I)/G(S)/G(T) subunit beta-1 OS=Homo sapiens OX=9606 GN=GNB1 PE=1 SV=3	GBB1_HUMAN	GNB1	37 kDa	TRUE	unknown	0	0	0	0	0	0	16804	15827	0
305	TRUE	Empty	Charged multivesicular body protein 4b OS=Homo sapiens OX=9606 GN=CHMP4B PE=1 SV=1	CHM4B_HUMAN	CHMP4B	25 kDa		unknown	0	0	0	0	0	0	0	15816	13262
306	TRUE	Empty	Plastin-1 OS=Homo sapiens OX=9606 GN=PLS1 PE=1 SV=2	PLSI_HUMAN	PLS1	70 kDa	TRUE	unknown	0	0	0	0	0	0	0	15809	0
307	TRUE	Empty	Prominin-1 OS=Homo sapiens OX=9606 GN=PROM1 PE=1 SV=1	PROM1_HUMAN	PROM1	97 kDa		unknown	0	0	0	0	0	0	13029	15783	0
308	TRUE	Empty	Synaptic vesicle membrane protein VAT-1 homolog OS=Homo sapiens OX=9606 GN=VAT1 PE=1 SV=2	VAT1_HUMAN	VAT1	42 kDa		unknown	0	0	0	0	0	0	0	15779	0
309	TRUE	Empty	Cluster of cAMP-dependent protein kinase type II-alpha regulatory subunit OS=Homo sapiens OX=9606 GN=PRKAR2A PE=1 SV=2 (KAP2_HUMAN)	KAP2_HUMAN	PRKAR2A	46 kDa	TRUE	unknown	0	0	0	0	0	0	0	15772	0
309.1	TRUE	Empty	cAMP-dependent protein kinase type II-alpha regulatory subunit OS=Homo sapiens OX=9606 GN=PRKAR2A PE=1 SV=2	KAP2_HUMAN	PRKAR2A	46 kDa	TRUE	unknown	0	0	0	0	0	0	0	15772	0
310	TRUE	Empty	Cathepsin D OS=Homo sapiens OX=9606 GN=CTSD PE=1 SV=1	CATD_HUMAN	CTSD	45 kDa		unknown	0	0	0	0	0	0	10415	15707	0
311	TRUE	Empty	Folate receptor alpha OS=Homo sapiens OX=9606 GN=FOLR1 PE=1 SV=3	FOLR1_HUMAN	FOLR1	30 kDa		unknown	0	0	0	0	0	0	0	15701	16495
312	TRUE	Empty	Proteasome subunit alpha type-1 OS=Homo sapiens OX=9606 GN=PSMA1 PE=1 SV=1	PSA1_HUMAN	PSMA1	30 kDa		unknown	0	0	0	0	0	0	0	15695	0
313	TRUE	Empty	Transforming growth factor-beta-induced protein ig-h3 OS=Homo sapiens OX=9606 GN=TGFBI PE=1 SV=1	BGH3_HUMAN	TGFBI	75 kDa		unknown	7638.6	13484	11099	0	13121	5613.3	0	15646	0
314	TRUE	Empty	Cluster of 14-3-3 protein zeta/delta OS=Homo sapiens OX=9606 GN=YWHAZ PE=1 SV=1 (1433Z_HUMAN)	1433Z_HUMAN [4]	YWHAZ	28 kDa	TRUE	unknown	8833	0	0	0	8815.5	0	0	15642	12394
315	TRUE	Empty	Alpha-1-antichymotrypsin OS=Homo sapiens OX=9606 GN=SERPINA3 PE=1 SV=2	AACT_HUMAN	SERPINA3	48 kDa	TRUE	unknown	27430	31064	31930	33128	34880	31279	9413.6	15612	0
316	TRUE	Empty	Desmoplakin OS=Homo sapiens OX=9606 GN=DSP PE=1 SV=3	DESP_HUMAN	DSP	332 kDa		unknown	0	0	5750.3	12727	0	0	24225	15568	0
317	TRUE	Empty	Beta-Ala-His dipeptidase OS=Homo sapiens OX=9606 GN=CNDP1 PE=1 SV=4	CNDP1_HUMAN	CNDP1	57 kDa		unknown	0	0	0	0	0	0	0	15521	0
318	TRUE	Empty	Cluster of Tropomyosin alpha-3 chain OS=Homo sapiens OX=9606 GN=TPM3 PE=1 SV=2 (TPM3_HUMAN)	TPM3_HUMAN	TPM3	33 kDa	TRUE	unknown	0	0	0	0	0	0	0	15441	0
318.1	TRUE	Empty	Tropomyosin alpha-4 chain OS=Homo sapiens OX=9606 GN=TPM4 PE=1 SV=3	TPM4_HUMAN	TPM4	29 kDa	TRUE	unknown	0	0	0	0	0	0	0	15441	0
319	TRUE	Empty	Biotinidase OS=Homo sapiens OX=9606 GN=BTD PE=1 SV=2	BTD_HUMAN	BTD	61 kDa		unknown	0	0	0	0	0	0	0	15398	0
320	TRUE	Empty	T-complex protein 1 subunit gamma OS=Homo sapiens OX=9606 GN=CCT3 PE=1 SV=4	TCPG_HUMAN	CCT3	61 kDa		unknown	0	0	0	0	0	0	0	15382	0
321	TRUE	Empty	BPI fold-containing family B member 4 OS=Homo sapiens OX=9606 GN=BPIFB4 PE=2 SV=2	BPIB4_HUMAN	BPIFB4	65 kDa		unknown	0	0	0	0	0	0	0	15374	0
322	TRUE	Empty	Sushi domain-containing protein 2 OS=Homo sapiens OX=9606 GN=SUSD2 PE=1 SV=1	SUSD2_HUMAN	SUSD2	90 kDa		unknown	0	0	0	0	0	0	0	15208	11730
323	TRUE	Empty	Filamin-B OS=Homo sapiens OX=9606 GN=FLNB PE=1 SV=2	FLNB_HUMAN	FLNB	278 kDa	TRUE	unknown	0	0	0	0	0	0	0	15196	0
324	TRUE	Empty	F-actin-capping protein subunit alpha-1 OS=Homo sapiens OX=9606 GN=CAPZA1 PE=1 SV=3	CAZA1_HUMAN	CAPZA1	33 kDa	TRUE	unknown	0	0	0	0	0	0	0	15132	0
325	TRUE	Empty	Na(+)/H(+) exchange regulatory cofactor NHE-RF1 OS=Homo sapiens OX=9606 GN=SLC9A3R1 PE=1 SV=4	NHRF1_HUMAN	SLC9A3R1	39 kDa		unknown	0	0	0	0	0	0	0	15076	0
326	TRUE	Empty	Ras GTPase-activating-like protein IQGAP1 OS=Homo sapiens OX=9606 GN=IQGAP1 PE=1 SV=1	IQGA1_HUMAN	IQGAP1	189 kDa		unknown	0	0	0	0	0	0	0	15023	0
327	TRUE	Empty	Desmoglein-1 OS=Homo sapiens OX=9606 GN=DSG1 PE=1 SV=2	DSG1_HUMAN	DSG1	114 kDa	TRUE	unknown	0	0	17107	17007	11205	0	15404	15016	0
328	TRUE	Empty	Cluster of Guanine nucleotide-binding protein G(I)/G(S)/G(T) subunit beta-2 OS=Homo sapiens OX=9606 GN=GNB2 PE=1 SV=3 (GBB2_HUMAN)	GBB2_HUMAN	GNB2	37 kDa	TRUE	unknown	0	0	0	0	0	0	13836	14938	0
328.1	TRUE	Empty	Guanine nucleotide-binding protein G(I)/G(S)/G(T) subunit beta-2 OS=Homo sapiens OX=9606 GN=GNB2 PE=1 SV=3	GBB2_HUMAN	GNB2	37 kDa	TRUE	unknown	0	0	0	0	0	0	13836	14938	0
329	TRUE	Empty	Transketolase OS=Homo sapiens OX=9606 GN=TKT PE=1 SV=3	TKT_HUMAN	TKT	68 kDa		unknown	12630	0	0	7282.5	0	0	0	14917	0
330	TRUE	Empty	Epidermal growth factor receptor kinase substrate 8-like protein 1 OS=Homo sapiens OX=9606 GN=EPS8L1 PE=1 SV=3	ES8L1_HUMAN	EPS8L1	80 kDa		unknown	0	0	0	0	0	0	13937	14836	0
331	TRUE	Empty	Protein disulfide-isomerase A6 OS=Homo sapiens OX=9606 GN=PDIA6 PE=1 SV=1	PDIA6_HUMAN	PDIA6	48 kDa		unknown	0	0	0	0	0	0	0	14799	0
332	TRUE	Empty	Periostin OS=Homo sapiens OX=9606 GN=POSTN PE=1 SV=2	POSTN_HUMAN	POSTN	93 kDa		unknown	0	0	0	0	0	0	0	14782	0
333	TRUE	Empty	Tumor-associated calcium signal transducer 2 OS=Homo sapiens OX=9606 GN=TACSTD2 PE=1 SV=3	TACD2_HUMAN	TACSTD2	36 kDa		unknown	0	0	0	0	0	0	0	14731	0
334	TRUE	Empty	Collagen alpha-2(IV) chain OS=Homo sapiens OX=9606 GN=COL4A2 PE=1 SV=4	CO4A2_HUMAN	COL4A2	168 kDa		unknown	0	0	0	0	0	0	0	14722	0
335	TRUE	Empty	Cluster of Sodium/potassium-transporting ATPase subunit alpha-1 OS=Homo sapiens OX=9606 GN=ATP1A1 PE=1 SV=1 (AT1A1_HUMAN)	AT1A1_HUMAN	ATP1A1	113 kDa	TRUE	unknown	0	0	0	0	0	0	0	14701	0
335.1	TRUE	Empty	Sodium/potassium-transporting ATPase subunit alpha-1 OS=Homo sapiens OX=9606 GN=ATP1A1 PE=1 SV=1	AT1A1_HUMAN	ATP1A1	113 kDa	TRUE	unknown	0	0	0	0	0	0	0	14701	0
336	TRUE	Empty	Elongation factor 2 OS=Homo sapiens OX=9606 GN=EEF2 PE=1 SV=4	EF2_HUMAN	EEF2	95 kDa		unknown	0	0	0	0	0	0	0	14681	0
337	TRUE	Empty	Mucin-16 OS=Homo sapiens OX=9606 GN=MUC16 PE=1 SV=3	MUC16_HUMAN	MUC16	1519 kDa		unknown	0	0	0	0	0	0	0	14566	0
338	TRUE	Empty	Angiotensinogen OS=Homo sapiens OX=9606 GN=AGT PE=1 SV=1	ANGT_HUMAN	AGT	53 kDa		unknown	18885	19665	16074	18380	20790	19072	8486.5	14467	11197
369.3	TRUE	Empty	Guanine nucleotide-binding protein G(s) subunit alpha isoforms XLas OS=Homo sapiens OX=9606 GN=GNAS PE=1 SV=2	GNAS1_HUMAN	GNAS	111 kDa	TRUE	unknown	0	0	0	0	0	0	18083	14459	0
339	TRUE	Empty	Aminopeptidase N OS=Homo sapiens OX=9606 GN=ANPEP PE=1 SV=4	AMPN_HUMAN	ANPEP	110 kDa		unknown	0	0	0	0	0	0	6404.5	14344	0
340	TRUE	Empty	Dystroglycan OS=Homo sapiens OX=9606 GN=DAG1 PE=1 SV=2	DAG1_HUMAN	DAG1	97 kDa		unknown	0	24375	18447	0	22361	18169	0	14273	0
341	TRUE	Empty	Niban-like protein 1 OS=Homo sapiens OX=9606 GN=FAM129B PE=1 SV=3	NIBL1_HUMAN	FAM129B	84 kDa		unknown	0	0	0	0	0	0	0	14251	0
342	TRUE	Empty	Aldo-keto reductase family 1 member A1 OS=Homo sapiens OX=9606 GN=AKR1A1 PE=1 SV=3	AK1A1_HUMAN	AKR1A1	37 kDa		unknown	0	0	0	0	0	0	0	14189	0
343	TRUE	Empty	Macrophage-capping protein OS=Homo sapiens OX=9606 GN=CAPG PE=1 SV=2	CAPG_HUMAN	CAPG	38 kDa		unknown	0	0	0	0	0	0	0	14129	0
344	TRUE	Empty	Erythrocyte band 7 integral membrane protein OS=Homo sapiens OX=9606 GN=STOM PE=1 SV=3	STOM_HUMAN	STOM	32 kDa		unknown	0	0	0	0	0	0	10918	14100	15897
345	TRUE	Empty	Acid sphingomyelinase-like phosphodiesterase 3b OS=Homo sapiens OX=9606 GN=SMPDL3B PE=1 SV=2	ASM3B_HUMAN	SMPDL3B	51 kDa		unknown	0	0	0	0	0	0	0	14031	0
346	TRUE	Empty	Glycogen phosphorylase, liver form OS=Homo sapiens OX=9606 GN=PYGL PE=1 SV=4	PYGL_HUMAN	PYGL	97 kDa	TRUE	unknown	0	0	0	0	0	0	0	14020	0
347	TRUE	Empty	Protein disulfide-isomerase OS=Homo sapiens OX=9606 GN=P4HB PE=1 SV=3	PDIA1_HUMAN	P4HB	57 kDa		unknown	0	0	0	0	0	0	0	13997	0
348	TRUE	Empty	Cluster of Ras-related protein Ral-B OS=Homo sapiens OX=9606 GN=RALB PE=1 SV=1 (RALB_HUMAN)	RALB_HUMAN [2]	RALB	23 kDa	TRUE	unknown	0	0	0	0	0	0	16333	13997	0
349	TRUE	Empty	Cluster of Rab GDP dissociation inhibitor beta OS=Homo sapiens OX=9606 GN=GDI2 PE=1 SV=2 (GDIB_HUMAN)	GDIB_HUMAN	GDI2	51 kDa	TRUE	unknown	0	0	0	0	0	0	0	13994	0
349.1	TRUE	Empty	Rab GDP dissociation inhibitor beta OS=Homo sapiens OX=9606 GN=GDI2 PE=1 SV=2	GDIB_HUMAN	GDI2	51 kDa	TRUE	unknown	0	0	0	0	0	0	0	13994	0
350	TRUE	Empty	Peroxidasin homolog OS=Homo sapiens OX=9606 GN=PXDN PE=1 SV=2	PXDN_HUMAN	PXDN	165 kDa		unknown	0	0	0	0	0	0	0	13924	0
351	TRUE	Empty	Myosin-14 OS=Homo sapiens OX=9606 GN=MYH14 PE=1 SV=2	MYH14_HUMAN	MYH14	228 kDa	TRUE	unknown	0	0	0	0	0	0	0	13888	0
352	TRUE	Empty	Collagen alpha-1(XII) chain OS=Homo sapiens OX=9606 GN=COL12A1 PE=1 SV=2	COCA1_HUMAN	COL12A1	333 kDa		unknown	0	0	0	0	0	0	0	13860	0
353	TRUE	Empty	Complement C1s subcomponent OS=Homo sapiens OX=9606 GN=C1S PE=1 SV=1	C1S_HUMAN	C1S	77 kDa		unknown	0	0	0	0	0	0	0	13858	0
354	TRUE	Empty	Histidine-rich glycoprotein OS=Homo sapiens OX=9606 GN=HRG PE=1 SV=1	HRG_HUMAN	HRG	60 kDa		unknown	14430	16264	16725	12743	17683	11853	0	13845	7072.8
355	TRUE	Empty	Cluster of Proteasome subunit alpha type-7 OS=Homo sapiens OX=9606 GN=PSMA7 PE=1 SV=1 (PSA7_HUMAN)	PSA7_HUMAN	PSMA7	28 kDa	TRUE	unknown	0	0	0	0	0	0	0	13788	0
355.1	TRUE	Empty	Proteasome subunit alpha type-7 OS=Homo sapiens OX=9606 GN=PSMA7 PE=1 SV=1	PSA7_HUMAN	PSMA7	28 kDa	TRUE	unknown	0	0	0	0	0	0	0	13788	0
356	TRUE	Empty	Ras-related protein R-Ras2 OS=Homo sapiens OX=9606 GN=RRAS2 PE=1 SV=1	RRAS2_HUMAN	RRAS2	23 kDa	TRUE	unknown	0	0	0	0	0	0	0	13753	0
357	TRUE	Empty	Cluster of Envoplakin OS=Homo sapiens OX=9606 GN=EVPL PE=1 SV=3 (EVPL_HUMAN)	EVPL_HUMAN	EVPL	232 kDa	TRUE	unknown	0	0	0	0	0	0	0	13720	0
357.1	TRUE	Empty	Envoplakin OS=Homo sapiens OX=9606 GN=EVPL PE=1 SV=3	EVPL_HUMAN	EVPL	232 kDa	TRUE	unknown	0	0	0	0	0	0	0	13720	0
358	TRUE	Empty	Platelet-activating factor acetylhydrolase IB subunit alpha OS=Homo sapiens OX=9606 GN=PAFAH1B1 PE=1 SV=2	LIS1_HUMAN	PAFAH1B1	47 kDa		unknown	0	0	0	0	0	0	0	13719	0
348.1	TRUE	Empty	Ras-related protein Ral-A OS=Homo sapiens OX=9606 GN=RALA PE=1 SV=1	RALA_HUMAN	RALA	24 kDa	TRUE	unknown	0	0	0	0	0	0	16333	13673	0
359	TRUE	Empty	Aldehyde dehydrogenase family 3 member B1 OS=Homo sapiens OX=9606 GN=ALDH3B1 PE=1 SV=1	AL3B1_HUMAN	ALDH3B1	52 kDa		unknown	0	0	0	0	0	0	0	13621	0
360	TRUE	Empty	Intercellular adhesion molecule 1 OS=Homo sapiens OX=9606 GN=ICAM1 PE=1 SV=2	ICAM1_HUMAN	ICAM1	58 kDa		unknown	16131	14737	13124	20104	0	0	0	13587	17403
361	TRUE	Empty	Glutamine synthetase OS=Homo sapiens OX=9606 GN=GLUL PE=1 SV=4	GLNA_HUMAN	GLUL	42 kDa		unknown	0	0	0	0	0	0	0	13563	0
362	TRUE	Empty	Transitional endoplasmic reticulum ATPase OS=Homo sapiens OX=9606 GN=VCP PE=1 SV=4	TERA_HUMAN	VCP	89 kDa		unknown	0	0	0	0	0	0	0	13553	0
363	TRUE	Empty	Multivesicular body subunit 12A OS=Homo sapiens OX=9606 GN=MVB12A PE=1 SV=1	MB12A_HUMAN	MVB12A	29 kDa		unknown	0	0	0	0	0	0	0	13493	11762
364	TRUE	Empty	T-complex protein 1 subunit beta OS=Homo sapiens OX=9606 GN=CCT2 PE=1 SV=4	TCPB_HUMAN	CCT2	57 kDa		unknown	0	0	0	0	0	0	0	13461	0
365	TRUE	Empty	Unconventional myosin-Id OS=Homo sapiens OX=9606 GN=MYO1D PE=1 SV=2	MYO1D_HUMAN	MYO1D	116 kDa		unknown	0	0	0	0	0	0	0	13460	0
366	TRUE	Empty	Cluster of 60S acidic ribosomal protein P0 OS=Homo sapiens OX=9606 GN=RPLP0 PE=1 SV=1 (RLA0_HUMAN)	RLA0_HUMAN	RPLP0	34 kDa	TRUE	unknown	0	0	0	0	0	0	0	13411	0
366.1	TRUE	Empty	60S acidic ribosomal protein P0 OS=Homo sapiens OX=9606 GN=RPLP0 PE=1 SV=1	RLA0_HUMAN	RPLP0	34 kDa	TRUE	unknown	0	0	0	0	0	0	0	13411	0
367	TRUE	Empty	1-phosphatidylinositol 4,5-bisphosphate phosphodiesterase delta-1 OS=Homo sapiens OX=9606 GN=PLCD1 PE=1 SV=2	PLCD1_HUMAN	PLCD1	86 kDa		unknown	0	0	0	0	0	0	0	13334	0
368	TRUE	Empty	Cluster of Ras-related protein Rab-2A OS=Homo sapiens OX=9606 GN=RAB2A PE=1 SV=1 (RAB2A_HUMAN)	RAB2A_HUMAN	RAB2A	24 kDa	TRUE	unknown	0	0	0	0	0	0	0	13327	0
368.1	TRUE	Empty	Ras-related protein Rab-2A OS=Homo sapiens OX=9606 GN=RAB2A PE=1 SV=1	RAB2A_HUMAN	RAB2A	24 kDa	TRUE	unknown	0	0	0	0	0	0	0	13327	0
369	TRUE	Empty	Cluster of Guanine nucleotide-binding protein G(i) subunit alpha-2 OS=Homo sapiens OX=9606 GN=GNAI2 PE=1 SV=3 (GNAI2_HUMAN)	GNAI2_HUMAN [3]	GNAI2	40 kDa	TRUE	unknown	0	0	0	0	0	0	15680	13282	19044
378.1	TRUE	Empty	Junction plakoglobin OS=Homo sapiens OX=9606 GN=JUP PE=1 SV=3	PLAK_HUMAN	JUP	82 kDa	TRUE	unknown	7185.8	4352.1	11852	12689	0	0	26748	13235	0
370	TRUE	Empty	Proteasome subunit beta type-3 OS=Homo sapiens OX=9606 GN=PSMB3 PE=1 SV=2	PSB3_HUMAN	PSMB3	23 kDa		unknown	0	0	0	0	0	0	0	13145	0
371	TRUE	Empty	EH domain-containing protein 2 OS=Homo sapiens OX=9606 GN=EHD2 PE=1 SV=2	EHD2_HUMAN	EHD2	61 kDa	TRUE	unknown	0	0	0	0	0	0	0	12981	0
372	TRUE	Empty	Apolipoprotein B-100 OS=Homo sapiens OX=9606 GN=APOB PE=1 SV=2	APOB_HUMAN	APOB	516 kDa		unknown	0	0	0	0	0	0	0	12969	0
373	TRUE	Empty	Elongation factor 1-gamma OS=Homo sapiens OX=9606 GN=EEF1G PE=1 SV=3	EF1G_HUMAN	EEF1G	50 kDa		unknown	0	0	0	0	0	0	0	12920	0
374	TRUE	Empty	Arachidonate 12-lipoxygenase, 12S-type OS=Homo sapiens OX=9606 GN=ALOX12 PE=1 SV=4	LOX12_HUMAN	ALOX12	76 kDa		unknown	0	0	0	0	0	0	0	12889	0
375	TRUE	Empty	G-protein coupled receptor family C group 5 member C OS=Homo sapiens OX=9606 GN=GPRC5C PE=1 SV=2	GPC5C_HUMAN	GPRC5C	48 kDa		unknown	0	0	0	0	0	0	15615	12782	17842
376	TRUE	Empty	Spectrin alpha chain, non-erythrocytic 1 OS=Homo sapiens OX=9606 GN=SPTAN1 PE=1 SV=3	SPTN1_HUMAN	SPTAN1	285 kDa		unknown	0	0	0	0	0	0	0	12779	0
377	TRUE	Empty	Heat shock 70 kDa protein 4 OS=Homo sapiens OX=9606 GN=HSPA4 PE=1 SV=4	HSP74_HUMAN	HSPA4	94 kDa	TRUE	unknown	0	0	0	0	0	0	0	12764	0
378	TRUE	Empty	Cluster of Junction plakoglobin OS=Homo sapiens OX=9606 GN=JUP PE=1 SV=3 (PLAK_HUMAN)	PLAK_HUMAN	JUP	82 kDa	TRUE	unknown	7185.8	4352.1	11852	12689	0	0	26748	12759	0
379	TRUE	Empty	Secretoglobin family 3A member 2 OS=Homo sapiens OX=9606 GN=SCGB3A2 PE=1 SV=1	SG3A2_HUMAN	SCGB3A2	10 kDa		unknown	0	0	0	0	0	0	0	12676	0
380	TRUE	Empty	Protein-glutamine gamma-glutamyltransferase K OS=Homo sapiens OX=9606 GN=TGM1 PE=1 SV=4	TGM1_HUMAN	TGM1	90 kDa		unknown	0	0	0	0	0	0	10466	12665	0
381	TRUE	Empty	Cartilage oligomeric matrix protein OS=Homo sapiens OX=9606 GN=COMP PE=1 SV=2	COMP_HUMAN	COMP	83 kDa	TRUE	unknown	0	0	0	0	0	0	0	12661	0
382	TRUE	Empty	Protein/nucleic acid deglycase DJ-1 OS=Homo sapiens OX=9606 GN=PARK7 PE=1 SV=2	PARK7_HUMAN	PARK7	20 kDa		unknown	0	0	0	0	0	0	0	12656	0
383	TRUE	Empty	Heat shock protein 105 kDa OS=Homo sapiens OX=9606 GN=HSPH1 PE=1 SV=1	HS105_HUMAN	HSPH1	97 kDa	TRUE	unknown	0	0	0	0	0	0	0	12653	0
384	TRUE	Empty	Cullin-associated NEDD8-dissociated protein 1 OS=Homo sapiens OX=9606 GN=CAND1 PE=1 SV=2	CAND1_HUMAN	CAND1	136 kDa		unknown	0	0	0	0	0	0	0	12533	0
385	TRUE	Empty	Filamin-A OS=Homo sapiens OX=9606 GN=FLNA PE=1 SV=4	FLNA_HUMAN	FLNA	281 kDa	TRUE	unknown	0	0	0	0	0	0	0	12512	0
386	TRUE	Empty	Major vault protein OS=Homo sapiens OX=9606 GN=MVP PE=1 SV=4	MVP_HUMAN	MVP	99 kDa		unknown	0	0	0	0	0	0	0	12390	0
387	TRUE	Empty	Syntaxin-binding protein 2 OS=Homo sapiens OX=9606 GN=STXBP2 PE=1 SV=2	STXB2_HUMAN	STXBP2	66 kDa		unknown	0	0	0	0	0	0	0	12294	0
388	TRUE	Empty	Thyroxine-binding globulin OS=Homo sapiens OX=9606 GN=SERPINA7 PE=1 SV=2	THBG_HUMAN	SERPINA7	46 kDa	TRUE	unknown	18530	19454	23877	16547	18122	17503	0	12249	0
389	TRUE	Empty	Proteasome subunit alpha type-2 OS=Homo sapiens OX=9606 GN=PSMA2 PE=1 SV=2	PSA2_HUMAN	PSMA2	26 kDa		unknown	0	0	0	0	0	0	0	12235	0
390	TRUE	Empty	Coronin-1C OS=Homo sapiens OX=9606 GN=CORO1C PE=1 SV=1	COR1C_HUMAN	CORO1C	53 kDa		unknown	0	0	0	0	0	0	0	12234	0
348.2	TRUE	Empty	Ras-related protein Ral-B OS=Homo sapiens OX=9606 GN=RALB PE=1 SV=1	RALB_HUMAN	RALB	23 kDa	TRUE	unknown	0	0	0	0	0	0	0	12228	0
391	TRUE	Empty	Phosphoglucomutase-1 OS=Homo sapiens OX=9606 GN=PGM1 PE=1 SV=3	PGM1_HUMAN	PGM1	61 kDa		unknown	0	0	0	0	0	0	0	12201	0
392	TRUE	Empty	Collagen alpha-2(I) chain OS=Homo sapiens OX=9606 GN=COL1A2 PE=1 SV=7	CO1A2_HUMAN	COL1A2	129 kDa		unknown	4880.8	5913.3	10648	0	0	8041.7	0	12165	0
393	TRUE	Empty	Phosphatidylethanolamine-binding protein 1 OS=Homo sapiens OX=9606 GN=PEBP1 PE=1 SV=3	PEBP1_HUMAN	PEBP1	21 kDa		unknown	0	15795	0	0	21203	0	0	12145	0
394	TRUE	Empty	Periplakin OS=Homo sapiens OX=9606 GN=PPL PE=1 SV=4	PEPL_HUMAN	PPL	205 kDa		unknown	0	0	0	0	0	0	0	11980	0
395	TRUE	Empty	Ectonucleotide pyrophosphatase/phosphodiesterase family member 3 OS=Homo sapiens OX=9606 GN=ENPP3 PE=1 SV=2	ENPP3_HUMAN	ENPP3	100 kDa		unknown	0	0	0	0	0	0	0	11964	0
396	TRUE	Empty	Acyl-protein thioesterase 1 OS=Homo sapiens OX=9606 GN=LYPLA1 PE=1 SV=1	LYPA1_HUMAN	LYPLA1	25 kDa		unknown	0	0	0	0	0	0	0	11934	0
397	TRUE	Empty	Serpin B6 OS=Homo sapiens OX=9606 GN=SERPINB6 PE=1 SV=3	SPB6_HUMAN	SERPINB6	43 kDa		unknown	0	0	0	0	0	0	0	11765	0
398	TRUE	Empty	Charged multivesicular body protein 5 OS=Homo sapiens OX=9606 GN=CHMP5 PE=1 SV=1	CHMP5_HUMAN	CHMP5	25 kDa		unknown	0	0	0	0	0	0	0	11758	15187
399	TRUE	Empty	Alpha-1B-glycoprotein OS=Homo sapiens OX=9606 GN=A1BG PE=1 SV=4	A1BG_HUMAN	A1BG	54 kDa		unknown	26890	29853	32687	26299	30714	33649	18152	11755	0
400	TRUE	Empty	Collagen alpha-1(VI) chain OS=Homo sapiens OX=9606 GN=COL6A1 PE=1 SV=3	CO6A1_HUMAN	COL6A1	109 kDa		unknown	19046	18952	21299	9511.1	21287	18269	0	11710	0
401	TRUE	Empty	Brain acid soluble protein 1 OS=Homo sapiens OX=9606 GN=BASP1 PE=1 SV=2	BASP1_HUMAN	BASP1	23 kDa		unknown	0	0	0	0	0	0	0	11524	0
402	TRUE	Empty	Agrin OS=Homo sapiens OX=9606 GN=AGRN PE=1 SV=6	AGRIN_HUMAN	AGRN	217 kDa		unknown	0	0	0	0	0	0	4810.3	11470	0
403	TRUE	Empty	Ubiquitin-like modifier-activating enzyme 1 OS=Homo sapiens OX=9606 GN=UBA1 PE=1 SV=3	UBA1_HUMAN	UBA1	118 kDa		unknown	0	0	0	0	0	0	0	11396	0
404	TRUE	Empty	Vascular endothelial growth factor receptor 1 OS=Homo sapiens OX=9606 GN=FLT1 PE=1 SV=2	VGFR1_HUMAN	FLT1	151 kDa		unknown	25018	33375	28993	26595	29043	29351	0	11395	0
405	TRUE	Empty	Serine/threonine-protein phosphatase 2A 65 kDa regulatory subunit A alpha isoform OS=Homo sapiens OX=9606 GN=PPP2R1A PE=1 SV=4	2AAA_HUMAN	PPP2R1A	65 kDa	TRUE	unknown	0	0	0	0	0	0	0	11248	0
406	TRUE	Empty	Transgelin-2 OS=Homo sapiens OX=9606 GN=TAGLN2 PE=1 SV=3	TAGL2_HUMAN	TAGLN2	22 kDa	TRUE	unknown	0	0	0	0	0	0	0	11207	0
407	TRUE	Empty	Collagen alpha-3(VI) chain OS=Homo sapiens OX=9606 GN=COL6A3 PE=1 SV=5	CO6A3_HUMAN	COL6A3	344 kDa		unknown	14374	13088	8428.4	0	7385.2	12880	0	11200	0
408	TRUE	Empty	Proteasome subunit beta type-4 OS=Homo sapiens OX=9606 GN=PSMB4 PE=1 SV=4	PSB4_HUMAN	PSMB4	29 kDa		unknown	0	0	0	0	0	0	0	11198	0
409	TRUE	Empty	Vinculin OS=Homo sapiens OX=9606 GN=VCL PE=1 SV=4	VINC_HUMAN	VCL	124 kDa		unknown	0	0	0	0	0	0	0	11091	0
410	TRUE	Empty	2',3'-cyclic-nucleotide 3'-phosphodiesterase OS=Homo sapiens OX=9606 GN=CNP PE=1 SV=2	CN37_HUMAN	CNP	48 kDa		unknown	0	0	0	0	0	0	0	10635	0
411	TRUE	Empty	Cytoplasmic dynein 1 heavy chain 1 OS=Homo sapiens OX=9606 GN=DYNC1H1 PE=1 SV=5	DYHC1_HUMAN	DYNC1H1	532 kDa		unknown	0	0	0	0	0	0	0	10582	0
412	TRUE	Empty	Cluster of Serine/threonine-protein kinase 24 OS=Homo sapiens OX=9606 GN=STK24 PE=1 SV=1 (STK24_HUMAN)	STK24_HUMAN	STK24	49 kDa	TRUE	unknown	0	0	0	0	0	0	0	10428	0
412.1	TRUE	Empty	Serine/threonine-protein kinase 24 OS=Homo sapiens OX=9606 GN=STK24 PE=1 SV=1	STK24_HUMAN	STK24	49 kDa	TRUE	unknown	0	0	0	0	0	0	0	10428	0
413	TRUE	Empty	Filaggrin-2 OS=Homo sapiens OX=9606 GN=FLG2 PE=1 SV=1	FILA2_HUMAN	FLG2	248 kDa		unknown	0	0	7234.1	0	0	0	13054	10363	0
414	TRUE	Empty	Calpain small subunit 1 OS=Homo sapiens OX=9606 GN=CAPNS1 PE=1 SV=1	CPNS1_HUMAN	CAPNS1	28 kDa		unknown	0	0	0	0	0	0	0	10247	0
415	TRUE	Empty	Carboxypeptidase M OS=Homo sapiens OX=9606 GN=CPM PE=1 SV=2	CBPM_HUMAN	CPM	51 kDa		unknown	0	15841	0	0	13691	36421	0	10223	0
416	TRUE	Empty	Alcohol dehydrogenase class 4 mu/sigma chain OS=Homo sapiens OX=9606 GN=ADH7 PE=1 SV=2	ADH7_HUMAN	ADH7	41 kDa		unknown	0	0	0	0	0	0	0	10143	0
417	TRUE	Empty	Calpain-7 OS=Homo sapiens OX=9606 GN=CAPN7 PE=1 SV=1	CAN7_HUMAN	CAPN7	93 kDa		unknown	0	0	0	0	0	0	0	10128	0
418	TRUE	Empty	Proteasome subunit beta type-5 OS=Homo sapiens OX=9606 GN=PSMB5 PE=1 SV=3	PSB5_HUMAN	PSMB5	28 kDa		unknown	0	0	0	0	0	0	0	9875.7	0
419	TRUE	Empty	Beta-1,3-galactosyl-O-glycosyl-glycoprotein beta-1,6-N-acetylglucosaminyltransferase 3 OS=Homo sapiens OX=9606 GN=GCNT3 PE=2 SV=1	GCNT3_HUMAN	GCNT3	51 kDa		unknown	0	0	0	0	0	0	0	9848.9	0
420	TRUE	Empty	Copine-1 OS=Homo sapiens OX=9606 GN=CPNE1 PE=1 SV=1	CPNE1_HUMAN	CPNE1	59 kDa		unknown	0	0	0	0	0	0	0	9837.8	0
421	TRUE	Empty	Epiplakin OS=Homo sapiens OX=9606 GN=EPPK1 PE=1 SV=3	EPIPL_HUMAN	EPPK1	556 kDa	TRUE	unknown	0	0	0	0	0	0	0	9707.7	0
440.1	TRUE	Empty	Guanine nucleotide-binding protein G(q) subunit alpha OS=Homo sapiens OX=9606 GN=GNAQ PE=1 SV=4	GNAQ_HUMAN	GNAQ	42 kDa	TRUE	unknown	0	0	0	0	0	0	0	9649	0
422	TRUE	Empty	Cluster of Leukocyte elastase inhibitor OS=Homo sapiens OX=9606 GN=SERPINB1 PE=1 SV=1 (ILEU_HUMAN)	ILEU_HUMAN [2]	SERPINB1	43 kDa	TRUE	unknown	18597	20302	0	20833	13405	0	17668	9529.1	0
423	TRUE	Empty	BPI fold-containing family B member 6 OS=Homo sapiens OX=9606 GN=BPIFB6 PE=1 SV=1	BPIB6_HUMAN	BPIFB6	50 kDa		unknown	0	0	0	0	0	0	0	9435.6	0
424	TRUE	Empty	Syntenin-2 OS=Homo sapiens OX=9606 GN=SDCBP2 PE=1 SV=2	SDCB2_HUMAN	SDCBP2	32 kDa		unknown	0	0	0	0	0	0	0	9369.8	0
425	TRUE	Empty	Complement component C8 alpha chain OS=Homo sapiens OX=9606 GN=C8A PE=1 SV=2	CO8A_HUMAN	C8A	65 kDa		unknown	0	9514.9	0	0	0	0	0	9366.4	0
426	TRUE	Empty	Laminin subunit gamma-1 OS=Homo sapiens OX=9606 GN=LAMC1 PE=1 SV=3	LAMC1_HUMAN	LAMC1	178 kDa		unknown	0	0	0	0	0	0	0	9337.1	0
427	TRUE	Empty	Vitamin D-binding protein OS=Homo sapiens OX=9606 GN=GC PE=1 SV=2	VTDB_HUMAN	GC	53 kDa		unknown	25149	23337	23373	27034	23331	23560	5553.8	9179.3	10740
428	TRUE	Empty	Keratin-associated protein 9-9 OS=Homo sapiens OX=9606 GN=KRTAP9-9 PE=2 SV=1	KRA99_HUMAN	KRTAP9-9	16 kDa		unknown	0	0	0	0	0	0	0	9112.4	0
429	TRUE	Empty	N-acetylmuramoyl-L-alanine amidase OS=Homo sapiens OX=9606 GN=PGLYRP2 PE=1 SV=1	PGRP2_HUMAN	PGLYRP2	62 kDa		unknown	9844.8	12052	11075	18976	12921	15061	0	8908.8	0
430	TRUE	Empty	Ubiquitin carboxyl-terminal hydrolase 5 OS=Homo sapiens OX=9606 GN=USP5 PE=1 SV=2	UBP5_HUMAN	USP5	96 kDa		unknown	0	0	0	0	0	0	0	8645.8	0
431	TRUE	Empty	Actin-related protein 2/3 complex subunit 2 OS=Homo sapiens OX=9606 GN=ARPC2 PE=1 SV=1	ARPC2_HUMAN	ARPC2	34 kDa		unknown	0	0	0	0	0	0	0	8430.2	0
432	TRUE	Empty	Chloride intracellular channel protein 6 OS=Homo sapiens OX=9606 GN=CLIC6 PE=2 SV=3	CLIC6_HUMAN	CLIC6	73 kDa	TRUE	unknown	0	0	0	0	0	0	0	8371.2	0
433	TRUE	Empty	Chloride intracellular channel protein 4 OS=Homo sapiens OX=9606 GN=CLIC4 PE=1 SV=4	CLIC4_HUMAN	CLIC4	29 kDa		unknown	0	0	0	0	0	0	0	8298	0
434	TRUE	Empty	Prenylcysteine oxidase 1 OS=Homo sapiens OX=9606 GN=PCYOX1 PE=1 SV=3	PCYOX_HUMAN	PCYOX1	57 kDa		unknown	0	0	0	0	0	0	0	8253.5	0
435	TRUE	Empty	ATP-dependent 6-phosphofructokinase, platelet type OS=Homo sapiens OX=9606 GN=PFKP PE=1 SV=2	PFKAP_HUMAN	PFKP	86 kDa	TRUE	unknown	0	0	0	0	0	0	0	8166.3	0
436	TRUE	Empty	Sorbitol dehydrogenase OS=Homo sapiens OX=9606 GN=SORD PE=1 SV=4	DHSO_HUMAN	SORD	38 kDa		unknown	0	0	0	0	0	0	0	8057.2	0
437	TRUE	Empty	Charged multivesicular body protein 4c OS=Homo sapiens OX=9606 GN=CHMP4C PE=1 SV=1	CHM4C_HUMAN	CHMP4C	26 kDa		unknown	0	0	0	0	0	0	0	8052.4	0
422.1	TRUE	Empty	Serpin B3 OS=Homo sapiens OX=9606 GN=SERPINB3 PE=1 SV=2	SPB3_HUMAN	SERPINB3	45 kDa	TRUE	unknown	10336	19229	0	15304	10602	0	19012	8039.3	0
438	TRUE	Empty	Cluster of Tyrosine-protein kinase Blk OS=Homo sapiens OX=9606 GN=BLK PE=1 SV=3 (BLK_HUMAN)	BLK_HUMAN	BLK	58 kDa	TRUE	unknown	0	0	0	0	0	0	0	7943.5	0
438.1	TRUE	Empty	Tyrosine-protein kinase Yes OS=Homo sapiens OX=9606 GN=YES1 PE=1 SV=3	YES_HUMAN	YES1	61 kDa	TRUE	unknown	0	0	0	0	0	0	0	7943.5	0
439	TRUE	Empty	Fatty acid synthase OS=Homo sapiens OX=9606 GN=FASN PE=1 SV=3	FAS_HUMAN	FASN	273 kDa		unknown	0	0	0	0	0	0	0	7846.6	0
440	TRUE	Empty	Cluster of Guanine nucleotide-binding protein G(q) subunit alpha OS=Homo sapiens OX=9606 GN=GNAQ PE=1 SV=4 (GNAQ_HUMAN)	GNAQ_HUMAN	GNAQ	42 kDa	TRUE	unknown	0	0	0	0	0	0	0	7753.4	0
441	TRUE	Empty	Apolipoprotein L1 OS=Homo sapiens OX=9606 GN=APOL1 PE=1 SV=5	APOL1_HUMAN	APOL1	44 kDa		unknown	0	0	0	0	0	0	0	7726.2	0
442	TRUE	Empty	Prolow-density lipoprotein receptor-related protein 1 OS=Homo sapiens OX=9606 GN=LRP1 PE=1 SV=2	LRP1_HUMAN-DECOY		?		unknown	0	0	0	0	0	0	0	7671.4	0
443	TRUE	Empty	Tenascin OS=Homo sapiens OX=9606 GN=TNC PE=1 SV=3	TENA_HUMAN	TNC	241 kDa		unknown	0	0	0	0	0	0	0	7668.6	0
444	TRUE	Empty	Glucose-6-phosphate isomerase OS=Homo sapiens OX=9606 GN=GPI PE=1 SV=4	G6PI_HUMAN	GPI	63 kDa		unknown	8474.2	0	0	0	0	0	0	7664.5	0
445	TRUE	Empty	Clusterin-associated protein 1 OS=Homo sapiens OX=9606 GN=CLUAP1 PE=1 SV=4	CLUA1_HUMAN-DECOY		?		unknown	0	0	0	0	0	0	0	7657.3	0
446	TRUE	Empty	Protein LEG1 homolog OS=Homo sapiens OX=9606 GN=LEG1 PE=1 SV=2	LEG1H_HUMAN	LEG1	38 kDa		unknown	7995.4	7853	5409.2	7397.1	7330.2	0	0	7566.8	0
447	TRUE	Empty	Mucin-4 OS=Homo sapiens OX=9606 GN=MUC4 PE=1 SV=4	MUC4_HUMAN	MUC4	232 kDa		unknown	0	0	0	0	0	0	0	7556.8	0
448	TRUE	Empty	Hornerin OS=Homo sapiens OX=9606 GN=HRNR PE=1 SV=2	HORN_HUMAN	HRNR	282 kDa		unknown	12486	9147.8	6503.7	8173.9	16878	11928	12744	7464.6	10366
449	TRUE	Empty	Unconventional myosin-Ib OS=Homo sapiens OX=9606 GN=MYO1B PE=1 SV=3	MYO1B_HUMAN	MYO1B	132 kDa	TRUE	unknown	0	0	0	0	0	0	0	7241.9	0
450	TRUE	Empty	Cluster of Glypican-4 OS=Homo sapiens OX=9606 GN=GPC4 PE=1 SV=4 (GPC4_HUMAN)	GPC4_HUMAN	GPC4	62 kDa	TRUE	unknown	0	0	0	0	0	0	0	7069.4	0
450.1	TRUE	Empty	Glypican-4 OS=Homo sapiens OX=9606 GN=GPC4 PE=1 SV=4	GPC4_HUMAN	GPC4	62 kDa	TRUE	unknown	0	0	0	0	0	0	0	7069.4	0
451	TRUE	Empty	Laminin subunit alpha-2 OS=Homo sapiens OX=9606 GN=LAMA2 PE=1 SV=4	LAMA2_HUMAN-DECOY		?		unknown	0	0	0	0	0	0	0	6924.3	0
452	TRUE	Empty	Filaggrin OS=Homo sapiens OX=9606 GN=FLG PE=1 SV=3	FILA_HUMAN	FLG	435 kDa		unknown	3767.1	4908.1	4838.4	0	5592.5	4411	18170	6607.8	0
453	TRUE	Empty	T-complex protein 1 subunit delta OS=Homo sapiens OX=9606 GN=CCT4 PE=1 SV=4	TCPD_HUMAN	CCT4	58 kDa		unknown	0	0	0	0	0	0	0	6568	0
454	TRUE	Empty	Myristoylated alanine-rich C-kinase substrate OS=Homo sapiens OX=9606 GN=MARCKS PE=1 SV=4	MARCS_HUMAN	MARCKS	32 kDa		unknown	0	0	0	0	0	0	0	6529.5	0
455	TRUE	Empty	Nicotinamide phosphoribosyltransferase OS=Homo sapiens OX=9606 GN=NAMPT PE=1 SV=1	NAMPT_HUMAN	NAMPT	56 kDa		unknown	0	0	0	0	0	0	0	6517	0
456	TRUE	Empty	Mucin-19 OS=Homo sapiens OX=9606 GN=MUC19 PE=1 SV=3	MUC19_HUMAN	MUC19	805 kDa		unknown	0	0	0	0	0	0	0	6492.7	0
457	TRUE	Empty	Tripeptidyl-peptidase 1 OS=Homo sapiens OX=9606 GN=TPP1 PE=1 SV=2	TPP1_HUMAN	TPP1	61 kDa		unknown	0	0	0	0	0	0	0	6283.1	0
458	TRUE	Empty	Excitatory amino acid transporter 3 OS=Homo sapiens OX=9606 GN=SLC1A1 PE=1 SV=2	EAA3_HUMAN	SLC1A1	57 kDa		unknown	0	0	0	0	0	0	0	6260.1	0
459	TRUE	Empty	Pre-B-cell leukemia transcription factor-interacting protein 1 OS=Homo sapiens OX=9606 GN=PBXIP1 PE=1 SV=1	PBIP1_HUMAN	PBXIP1	81 kDa		unknown	0	0	0	0	0	0	0	6204.4	0
460	TRUE	Empty	Importin subunit beta-1 OS=Homo sapiens OX=9606 GN=KPNB1 PE=1 SV=2	IMB1_HUMAN	KPNB1	97 kDa		unknown	0	0	0	0	0	0	0	6099.2	0
461	TRUE	Empty	Multiple epidermal growth factor-like domains protein 6 OS=Homo sapiens OX=9606 GN=MEGF6 PE=1 SV=4	MEGF6_HUMAN	MEGF6	161 kDa		unknown	0	0	0	0	0	7972.1	0	5910.3	0
462	TRUE	Empty	Golgin subfamily A member 3 OS=Homo sapiens OX=9606 GN=GOLGA3 PE=1 SV=2	GOGA3_HUMAN-DECOY		?		unknown	0	0	0	0	0	0	0	5768.7	0
463	TRUE	Empty	Fibrillin-3 OS=Homo sapiens OX=9606 GN=FBN3 PE=2 SV=3	FBN3_HUMAN-DECOY		?		unknown	0	11346	0	0	0	0	0	5589.4	0
464	TRUE	Empty	Adenylyl cyclase-associated protein 1 OS=Homo sapiens OX=9606 GN=CAP1 PE=1 SV=5	CAP1_HUMAN	CAP1	52 kDa		unknown	0	0	0	0	0	0	0	5574.5	0
465	TRUE	Empty	Adhesion G-protein coupled receptor F1 OS=Homo sapiens OX=9606 GN=ADGRF1 PE=1 SV=2	AGRF1_HUMAN	ADGRF1	101 kDa		unknown	0	0	0	0	0	0	0	5483.9	0
466	TRUE	Empty	MAP kinase-activating death domain protein OS=Homo sapiens OX=9606 GN=MADD PE=1 SV=2	MADD_HUMAN	MADD	183 kDa		unknown	0	0	0	0	0	0	0	5447.6	0
467	TRUE	Empty	Ryanodine receptor 1 OS=Homo sapiens OX=9606 GN=RYR1 PE=1 SV=3	RYR1_HUMAN-DECOY		?	TRUE	unknown	0	0	0	0	0	0	0	5067.2	0
468	TRUE	Empty	Chloride intracellular channel protein 3 OS=Homo sapiens OX=9606 GN=CLIC3 PE=1 SV=2	CLIC3_HUMAN	CLIC3	27 kDa		unknown	0	0	0	0	0	0	0	5007.8	0
469	TRUE	Empty	T-complex protein 1 subunit zeta OS=Homo sapiens OX=9606 GN=CCT6A PE=1 SV=3	TCPZ_HUMAN	CCT6A	58 kDa		unknown	0	0	0	0	0	0	0	4903.6	0
470	TRUE	Empty	NF-kappa-B-activating protein OS=Homo sapiens OX=9606 GN=NKAP PE=1 SV=1	NKAP_HUMAN-DECOY		?	TRUE	unknown	0	0	0	0	0	0	0	4815.3	0
471	TRUE	Empty	Suprabasin OS=Homo sapiens OX=9606 GN=SBSN PE=1 SV=2	SBSN_HUMAN	SBSN	61 kDa		unknown	0	9493.4	0	0	0	0	9166.5	4665.2	0
472	TRUE	Empty	FERM and PDZ domain-containing protein 1 OS=Homo sapiens OX=9606 GN=FRMPD1 PE=1 SV=1	FRPD1_HUMAN-DECOY		?		unknown	0	0	0	0	0	0	0	4657.4	0
473	TRUE	Empty	Sex hormone-binding globulin OS=Homo sapiens OX=9606 GN=SHBG PE=1 SV=2	SHBG_HUMAN	SHBG	44 kDa	TRUE	unknown	10778	10819	9297.4	12079	9328.3	11893	0	4582.4	0
474	TRUE	Empty	Cytidine and dCMP deaminase domain-containing protein 1 OS=Homo sapiens OX=9606 GN=CDADC1 PE=2 SV=1	CDAC1_HUMAN	CDADC1	58 kDa		unknown	0	0	0	0	0	0	0	4515.3	0
475	TRUE	Empty	Catenin alpha-1 OS=Homo sapiens OX=9606 GN=CTNNA1 PE=1 SV=1	CTNA1_HUMAN	CTNNA1	100 kDa	TRUE	unknown	0	0	0	0	0	0	0	4478.6	0
476	TRUE	Empty	Laminin subunit beta-3 OS=Homo sapiens OX=9606 GN=LAMB3 PE=1 SV=1	LAMB3_HUMAN	LAMB3	130 kDa		unknown	0	0	0	0	0	0	0	4412.1	0
477	TRUE	Empty	Transcription factor SOX-1 OS=Homo sapiens OX=9606 GN=SOX1 PE=1 SV=2	SOX1_HUMAN	SOX1	39 kDa	TRUE	unknown	0	0	0	0	0	0	0	4214.5	0
478	TRUE	Empty	Talin-1 OS=Homo sapiens OX=9606 GN=TLN1 PE=1 SV=3	TLN1_HUMAN	TLN1	270 kDa		unknown	0	0	0	0	0	0	0	4207.6	0
479	TRUE	Empty	Titin OS=Homo sapiens OX=9606 GN=TTN PE=1 SV=4	TITIN_HUMAN	TTN	3816 kDa		unknown	0	0	0	0	0	0	9497.4	3942	0
480	TRUE	Empty	Protein AHNAK2 OS=Homo sapiens OX=9606 GN=AHNAK2 PE=1 SV=2	AHNK2_HUMAN-DECOY		?		unknown	0	0	0	0	0	0	0	3880.2	0
481	TRUE	Empty	AT-rich interactive domain-containing protein 1B OS=Homo sapiens OX=9606 GN=ARID1B PE=1 SV=2	ARI1B_HUMAN	ARID1B	236 kDa		unknown	0	6011.2	0	3455.1	2327.7	1497.7	0	3532.3	0
482	TRUE	Empty	Fibrillin-2 OS=Homo sapiens OX=9606 GN=FBN2 PE=1 SV=3	FBN2_HUMAN-DECOY		?		unknown	0	0	0	0	0	8743.5	0	3095.1	0
483	TRUE	Empty	Low-density lipoprotein receptor OS=Homo sapiens OX=9606 GN=LDLR PE=1 SV=1	LDLR_HUMAN-DECOY		?		unknown	0	0	0	0	0	0	0	2862.7	0
484	TRUE	Empty	Low-density lipoprotein receptor-related protein 8 OS=Homo sapiens OX=9606 GN=LRP8 PE=1 SV=4	LRP8_HUMAN-DECOY		?		unknown	0	0	0	0	0	0	0	2831.2	0
485	TRUE	Empty	Nuclear factor 1 C-type OS=Homo sapiens OX=9606 GN=NFIC PE=1 SV=2	NFIC_HUMAN-DECOY		?		unknown	0	0	0	0	0	0	0	2652.6	0
486	TRUE	Empty	Protein Jade-1 OS=Homo sapiens OX=9606 GN=JADE1 PE=1 SV=1	JADE1_HUMAN-DECOY		?		unknown	0	0	0	0	0	0	0	2002.4	0
487	TRUE	Empty	Sortilin-related receptor OS=Homo sapiens OX=9606 GN=SORL1 PE=1 SV=2	SORL_HUMAN	SORL1	248 kDa		unknown	0	0	0	0	0	0	0	1970.5	0
488	TRUE	Empty	Stabilin-1 OS=Homo sapiens OX=9606 GN=STAB1 PE=1 SV=3	STAB1_HUMAN	STAB1	275 kDa		unknown	0	0	0	0	0	0	0	1960.2	0
51.1	TRUE	Empty	Keratin, type II cytoskeletal 72 OS=Homo sapiens OX=9606 GN=KRT72 PE=1 SV=2	K2C72_HUMAN	KRT72	56 kDa	TRUE	unknown	0	0	0	0	51990	0	0	0	0
555	TRUE	Empty	Alpha-1-acid glycoprotein 1 OS=Homo sapiens OX=9606 GN=ORM1 PE=1 SV=1	A1AG1_HUMAN	ORM1	24 kDa	TRUE	unknown	45337	47973	43508	47963	45533	44368	14257	0	0
655	TRUE	Empty	Immunoglobulin kappa variable 4-1 OS=Homo sapiens OX=9606 GN=IGKV4-1 PE=1 SV=1	KV401_HUMAN	IGKV4-1	13 kDa		unknown	36598	41328	29885	32421	42979	24982	0	0	0
561	TRUE	Empty	Immunoglobulin kappa variable 3-11 OS=Homo sapiens OX=9606 GN=IGKV3-11 PE=1 SV=1	KV311_HUMAN (+1)	IGKV3-11	13 kDa	TRUE	unknown	42112	38221	24862	37038	42132	23356	0	0	0
585	TRUE	Empty	Alpha-1-acid glycoprotein 2 OS=Homo sapiens OX=9606 GN=ORM2 PE=1 SV=2	A1AG2_HUMAN	ORM2	24 kDa	TRUE	unknown	38254	43436	45849	39361	40171	38956	15617	0	0
498.1	TRUE	Empty	Immunoglobulin kappa variable 2-28 OS=Homo sapiens OX=9606 GN=IGKV2-28 PE=3 SV=1	KV228_HUMAN	IGKV2-28	13 kDa	TRUE	unknown	44109	46801	0	31522	39493	0	0	0	0
498.2	TRUE	Empty	Immunoglobulin kappa variable 2-40 OS=Homo sapiens OX=9606 GN=IGKV2-40 PE=3 SV=2	KV240_HUMAN	IGKV2-40	13 kDa	TRUE	unknown	0	34312	0	0	38634	0	0	0	0
538.1	TRUE	Empty	Pregnancy-specific beta-1-glycoprotein 6 OS=Homo sapiens OX=9606 GN=PSG6 PE=2 SV=1	PSG6_HUMAN	PSG6	49 kDa	TRUE	unknown	0	37010	0	0	33421	42520	0	0	0
509	TRUE	Empty	Superoxide dismutase [Cu-Zn] OS=Homo sapiens OX=9606 GN=SOD1 PE=1 SV=2	SODC_HUMAN	SOD1	16 kDa		unknown	22763	0	20361	18352	32928	19845	0	0	0
682	TRUE	Empty	Carbonic anhydrase 1 OS=Homo sapiens OX=9606 GN=CA1 PE=1 SV=2	CAH1_HUMAN	CA1	29 kDa		unknown	0	27818	0	0	31183	0	0	0	0
161.4	TRUE	Empty	Immunoglobulin heavy variable 3-7 OS=Homo sapiens OX=9606 GN=IGHV3-7 PE=1 SV=2	HV307_HUMAN	IGHV3-7	13 kDa	TRUE	unknown	30269	0	28178	29871	30925	0	0	0	0
498	TRUE	Empty	Cluster of Immunoglobulin kappa variable 2-28 OS=Homo sapiens OX=9606 GN=IGKV2-28 PE=3 SV=1 (KV228_HUMAN)	KV228_HUMAN [4]	IGKV2-28	13 kDa	TRUE	unknown	31006	35832	0	27426	29980	44491	0	0	0
638	TRUE	Empty	Prostaglandin-H2 D-isomerase OS=Homo sapiens OX=9606 GN=PTGDS PE=1 SV=1	PTGDS_HUMAN	PTGDS	21 kDa		unknown	24963	31489	28360	25815	28780	31633	12002	0	0
639	TRUE	Empty	Prolactin OS=Homo sapiens OX=9606 GN=PRL PE=1 SV=1	PRL_HUMAN	PRL	26 kDa		unknown	32018	28294	0	31198	28335	23900	0	0	0
661	TRUE	Empty	Glycodelin OS=Homo sapiens OX=9606 GN=PAEP PE=1 SV=2	PAEP_HUMAN	PAEP	21 kDa		unknown	0	0	0	0	27778	0	0	0	0
634	TRUE	Empty	SPARC OS=Homo sapiens OX=9606 GN=SPARC PE=1 SV=1	SPRC_HUMAN	SPARC	35 kDa		unknown	0	21946	0	0	27048	19068	0	0	0
541	TRUE	Empty	Retinol-binding protein 4 OS=Homo sapiens OX=9606 GN=RBP4 PE=1 SV=3	RET4_HUMAN	RBP4	23 kDa		unknown	13735	23516	24952	14657	26084	20721	4847.2	0	0
627	TRUE	Empty	Vesicular integral-membrane protein VIP36 OS=Homo sapiens OX=9606 GN=LMAN2 PE=1 SV=1	LMAN2_HUMAN	LMAN2	40 kDa		unknown	21218	25136	16800	24147	25654	19324	0	0	0
676	TRUE	Empty	Corticosteroid-binding globulin OS=Homo sapiens OX=9606 GN=SERPINA6 PE=1 SV=1	CBG_HUMAN	SERPINA6	45 kDa	TRUE	unknown	16923	25727	24904	27130	24040	22181	7139.6	0	0
674	TRUE	Empty	Cystatin-C OS=Homo sapiens OX=9606 GN=CST3 PE=1 SV=1	CYTC_HUMAN	CST3	16 kDa		unknown	9457.6	19418	23775	11858	23650	25166	0	0	0
538	TRUE	Empty	Cluster of Pregnancy-specific beta-1-glycoprotein 1 OS=Homo sapiens OX=9606 GN=PSG1 PE=1 SV=1 (PSG1_HUMAN)	PSG1_HUMAN [3]	PSG1	47 kDa	TRUE	unknown	0	28497	27326	0	23484	29416	0	0	0
592	TRUE	Empty	Complement C1r subcomponent-like protein OS=Homo sapiens OX=9606 GN=C1RL PE=1 SV=2	C1RL_HUMAN	C1RL	53 kDa		unknown	22934	0	23054	0	23228	19917	0	0	0
538.3	TRUE	Empty	Pregnancy-specific beta-1-glycoprotein 1 OS=Homo sapiens OX=9606 GN=PSG1 PE=1 SV=1	PSG1_HUMAN	PSG1	47 kDa	TRUE	unknown	0	28885	29927	0	23128	29590	0	0	0
499	TRUE	Empty	Prolactin-inducible protein OS=Homo sapiens OX=9606 GN=PIP PE=1 SV=1	PIP_HUMAN	PIP	17 kDa		unknown	22043	22206	16870	25837	23032	16491	0	0	0
527	TRUE	Empty	Apolipoprotein A-IV OS=Homo sapiens OX=9606 GN=APOA4 PE=1 SV=3	APOA4_HUMAN	APOA4	45 kDa		unknown	31124	40539	32745	36006	21889	0	0	0	35013
554	TRUE	Empty	Afamin OS=Homo sapiens OX=9606 GN=AFM PE=1 SV=1	AFAM_HUMAN	AFM	69 kDa		unknown	23988	22917	24735	20011	21707	30406	0	0	0
520	TRUE	Empty	sp|Q8NFD5|ARI1B_HUMAN-DECOY AT-rich interactive domain-containing protein 1B OS=Homo...	ARI1B_HUMAN-DECOY		?		unknown	0	0	0	0	21114	10642	0	0	0
651	TRUE	Empty	Insulin-like growth factor-binding protein 7 OS=Homo sapiens OX=9606 GN=IGFBP7 PE=1 SV=1	IBP7_HUMAN	IGFBP7	29 kDa		unknown	21191	17927	16705	21168	20903	15830	0	0	0
628	TRUE	Empty	Transcobalamin-1 OS=Homo sapiens OX=9606 GN=TCN1 PE=1 SV=2	TCO1_HUMAN	TCN1	48 kDa		unknown	14874	41665	20892	28793	20657	26043	0	0	0
161.5	TRUE	Empty	Immunoglobulin heavy variable 3-66 OS=Homo sapiens OX=9606 GN=IGHV3-66 PE=3 SV=1	HV366_HUMAN	IGHV3-66	13 kDa	TRUE	unknown	0	29937	0	30555	20396	0	0	0	0
648	TRUE	Empty	Lipocalin-1 OS=Homo sapiens OX=9606 GN=LCN1 PE=1 SV=1	LCN1_HUMAN	LCN1	19 kDa		unknown	16494	28160	21633	24524	20200	29062	18646	0	0
534	TRUE	Empty	Cluster of Immunoglobulin lambda variable 1-47 OS=Homo sapiens OX=9606 GN=IGLV1-47 PE=1 SV=2 (LV147_HUMAN)	LV147_HUMAN	IGLV1-47	12 kDa	TRUE	unknown	31251	29637	27313	31661	20166	27553	0	0	0
534.1	TRUE	Empty	Immunoglobulin lambda variable 1-47 OS=Homo sapiens OX=9606 GN=IGLV1-47 PE=1 SV=2	LV147_HUMAN	IGLV1-47	12 kDa	TRUE	unknown	31252	29637	27313	31661	20166	27553	0	0	0
600	TRUE	Empty	Ribonuclease pancreatic OS=Homo sapiens OX=9606 GN=RNASE1 PE=1 SV=4	RNAS1_HUMAN	RNASE1	18 kDa		unknown	13661	16689	13436	18360	20091	21272	0	0	0
126.2	TRUE	Empty	Haptoglobin-related protein OS=Homo sapiens OX=9606 GN=HPR PE=2 SV=2	HPTR_HUMAN	HPR	39 kDa	TRUE	unknown	0	0	0	0	19941	0	0	0	0
673	TRUE	Empty	Cysteine-rich secretory protein 3 OS=Homo sapiens OX=9606 GN=CRISP3 PE=1 SV=1	CRIS3_HUMAN	CRISP3	28 kDa		unknown	26838	23012	0	19283	19899	12833	0	0	0
614	TRUE	Empty	Kallikrein-1 OS=Homo sapiens OX=9606 GN=KLK1 PE=1 SV=2	KLK1_HUMAN	KLK1	29 kDa		unknown	0	0	0	0	19884	0	0	0	0
656	TRUE	Empty	Immunoglobulin kappa variable 3-15 OS=Homo sapiens OX=9606 GN=IGKV3-15 PE=1 SV=2	KV315_HUMAN	IGKV3-15	12 kDa		unknown	20589	15448	16933	25921	19693	15204	0	0	0
643	TRUE	Empty	Neutrophil gelatinase-associated lipocalin OS=Homo sapiens OX=9606 GN=LCN2 PE=1 SV=2	NGAL_HUMAN	LCN2	23 kDa		unknown	17986	13580	0	16479	18528	0	0	0	0
645	TRUE	Empty	NPC intracellular cholesterol transporter 2 OS=Homo sapiens OX=9606 GN=NPC2 PE=1 SV=1	NPC2_HUMAN	NPC2	17 kDa		unknown	17474	13836	13663	17153	17867	20331	0	0	0
422.2	TRUE	Empty	Leukocyte elastase inhibitor OS=Homo sapiens OX=9606 GN=SERPINB1 PE=1 SV=1	ILEU_HUMAN	SERPINB1	43 kDa	TRUE	unknown	33314	24006	0	30297	17751	0	15259	0	0
658	TRUE	Empty	Immunoglobulin kappa variable 1D-33 OS=Homo sapiens OX=9606 GN=IGKV1D-33 PE=1 SV=2	KVD33_HUMAN	IGKV1D-33	13 kDa	TRUE	unknown	15427	22367	0	17769	17345	0	0	0	0
625	TRUE	Empty	Cluster of Alpha-amylase 1 OS=Homo sapiens OX=9606 GN=AMY1A PE=1 SV=2 (AMY1_HUMAN)	AMY1_HUMAN	AMY1A	58 kDa	TRUE	unknown	13528	15698	0	14868	16924	17261	0	0	0
625.1	TRUE	Empty	Alpha-amylase 1 OS=Homo sapiens OX=9606 GN=AMY1A PE=1 SV=2	AMY1_HUMAN	AMY1A	58 kDa	TRUE	unknown	13528	15698	0	14868	16924	17261	0	0	0
505	TRUE	Empty	Antileukoproteinase OS=Homo sapiens OX=9606 GN=SLPI PE=1 SV=2	SLPI_HUMAN	SLPI	14 kDa		unknown	15662	16196	16808	17151	16453	14478	0	0	0
653	TRUE	Empty	Immunoglobulin superfamily containing leucine-rich repeat protein OS=Homo sapiens OX=9606 GN=ISLR PE=2 SV=1	ISLR_HUMAN	ISLR	46 kDa		unknown	0	0	0	0	15971	0	0	0	0
540	TRUE	Empty	Insulin-like growth factor-binding protein 2 OS=Homo sapiens OX=9606 GN=IGFBP2 PE=1 SV=2	IBP2_HUMAN	IGFBP2	35 kDa		unknown	0	16699	8743.3	0	15762	0	0	0	0
535	TRUE	Empty	Immunoglobulin heavy variable 4-4 OS=Homo sapiens OX=9606 GN=IGHV4-4 PE=3 SV=2	HV404_HUMAN (+8)	IGHV4-4	13 kDa		unknown	0	18443	12534	17575	15561	14580	0	0	0
548	TRUE	Empty	Collagen alpha-1(XVIII) chain OS=Homo sapiens OX=9606 GN=COL18A1 PE=1 SV=5	COIA1_HUMAN	COL18A1	178 kDa		unknown	0	8201.3	0	7995.3	14724	10071	0	0	0
596	TRUE	Empty	Hyaluronan-binding protein 2 OS=Homo sapiens OX=9606 GN=HABP2 PE=1 SV=1	HABP2_HUMAN	HABP2	63 kDa		unknown	0	15928	12200	0	14376	10982	0	0	0
620	TRUE	Empty	Cluster of Immunoglobulin kappa variable 1-6 OS=Homo sapiens OX=9606 GN=IGKV1-6 PE=3 SV=1 (KV106_HUMAN)	KV106_HUMAN [3]	IGKV1-6	13 kDa	TRUE	unknown	16014	17779	18015	17872	14175	15009	0	0	0
519	TRUE	Empty	Kallistatin OS=Homo sapiens OX=9606 GN=SERPINA4 PE=1 SV=3	KAIN_HUMAN	SERPINA4	49 kDa		unknown	17528	16915	18480	17492	13987	16641	0	0	0
494	TRUE	Empty	EGF-containing fibulin-like extracellular matrix protein 1 OS=Homo sapiens OX=9606 GN=EFEMP1 PE=1 SV=2	FBLN3_HUMAN	EFEMP1	55 kDa		unknown	13440	13091	15425	12143	13922	12171	0	0	0
593	TRUE	Empty	Pappalysin-2 OS=Homo sapiens OX=9606 GN=PAPPA2 PE=1 SV=4	PAPP2_HUMAN	PAPPA2	199 kDa		unknown	21623	16007	9795.1	14899	13641	11341	0	0	0
523	TRUE	Empty	Cluster of Immunoglobulin lambda variable 3-21 OS=Homo sapiens OX=9606 GN=IGLV3-21 PE=1 SV=2 (LV321_HUMAN)	LV321_HUMAN	IGLV3-21	12 kDa	TRUE	unknown	14274	0	0	11752	13326	0	0	0	0
523.1	TRUE	Empty	Immunoglobulin lambda variable 3-21 OS=Homo sapiens OX=9606 GN=IGLV3-21 PE=1 SV=2	LV321_HUMAN	IGLV3-21	12 kDa	TRUE	unknown	14274	0	0	11752	13326	0	0	0	0
678	TRUE	Empty	Complement factor I OS=Homo sapiens OX=9606 GN=CFI PE=1 SV=2	CFAI_HUMAN	CFI	66 kDa		unknown	15696	11130	12101	14396	12688	12229	0	0	0
663	TRUE	Empty	Follistatin-related protein 3 OS=Homo sapiens OX=9606 GN=FSTL3 PE=1 SV=1	FSTL3_HUMAN	FSTL3	28 kDa		unknown	21148	15759	21116	21347	12616	19630	0	0	0
649	TRUE	Empty	Leucine-rich alpha-2-glycoprotein OS=Homo sapiens OX=9606 GN=LRG1 PE=1 SV=2	A2GL_HUMAN	LRG1	38 kDa		unknown	0	0	0	5519.2	12152	19044	0	0	0
687	TRUE	Empty	Acid-sensing ion channel 4 OS=Homo sapiens OX=9606 GN=ASIC4 PE=1 SV=2	ASIC4_HUMAN	ASIC4	70 kDa		unknown	0	0	0	0	11682	0	0	0	0
620.3	TRUE	Empty	Immunoglobulin kappa variable 1-6 OS=Homo sapiens OX=9606 GN=IGKV1-6 PE=3 SV=1	KV106_HUMAN	IGKV1-6	13 kDa	TRUE	unknown	0	13050	16073	14052	11539	12605	0	0	0
532	TRUE	Empty	Fetuin-B OS=Homo sapiens OX=9606 GN=FETUB PE=1 SV=2	FETUB_HUMAN	FETUB	42 kDa		unknown	13347	0	18674	14399	10697	18444	0	0	0
553	TRUE	Empty	Nidogen-1 OS=Homo sapiens OX=9606 GN=NID1 PE=1 SV=3	NID1_HUMAN	NID1	136 kDa		unknown	10874	10314	8901.9	10708	10640	9996.9	0	0	0
496	TRUE	Empty	Insulin-like growth factor-binding protein complex acid labile subunit OS=Homo sapiens OX=9606 GN=IGFALS PE=1 SV=1	ALS_HUMAN	IGFALS	66 kDa		unknown	16224	18610	13127	0	9513.2	16084	0	0	0
586	TRUE	Empty	Hemicentin-2 OS=Homo sapiens OX=9606 GN=HMCN2 PE=2 SV=3	HMCN2_HUMAN	HMCN2	542 kDa		unknown	0	0	0	0	9298.6	0	0	0	0
491	TRUE	Empty	Low-density lipoprotein receptor-related protein 1B OS=Homo sapiens OX=9606 GN=LRP1B PE=1 SV=2	LRP1B_HUMAN-DECOY		?		unknown	0	0	1560.1	6851.2	9227.3	0	0	0	0
562	TRUE	Empty	ATP-binding cassette sub-family A member 7 OS=Homo sapiens OX=9606 GN=ABCA7 PE=1 SV=3	ABCA7_HUMAN	ABCA7	234 kDa		unknown	0	0	0	0	9085.9	0	0	0	0
601	TRUE	Empty	Insulin-like growth factor-binding protein 3 OS=Homo sapiens OX=9606 GN=IGFBP3 PE=1 SV=2	IBP3_HUMAN	IGFBP3	32 kDa		unknown	0	11306	0	14734	8951.3	0	0	0	0
680	TRUE	Empty	Chitinase-3-like protein 1 OS=Homo sapiens OX=9606 GN=CHI3L1 PE=1 SV=2	CH3L1_HUMAN	CHI3L1	43 kDa		unknown	0	10303	0	0	8009.4	0	0	0	0
566	TRUE	Empty	Transcription elongation factor SPT5 OS=Homo sapiens OX=9606 GN=SUPT5H PE=1 SV=1	SPT5H_HUMAN-DECOY		?		unknown	0	0	0	0	7945.7	0	0	0	0
537	TRUE	Empty	Fibrillin-3 OS=Homo sapiens OX=9606 GN=FBN3 PE=2 SV=3	FBN3_HUMAN	FBN3	300 kDa		unknown	0	0	0	5051.7	6859	0	4426.9	0	0
591	TRUE	Empty	Otoferlin OS=Homo sapiens OX=9606 GN=OTOF PE=1 SV=3	OTOF_HUMAN-DECOY		?		unknown	0	0	0	0	6483.1	0	0	0	0
508	TRUE	Empty	Serine/threonine-protein phosphatase 1 regulatory subunit 10 OS=Homo sapiens OX=9606 GN=PPP1R10 PE=1 SV=1	PP1RA_HUMAN-DECOY		?		unknown	0	0	0	0	6276.3	0	0	0	0
560	TRUE	Empty	Neurogenic locus notch homolog protein 2 OS=Homo sapiens OX=9606 GN=NOTCH2 PE=1 SV=3	NOTC2_HUMAN	NOTCH2	265 kDa	TRUE	unknown	1375.6	0	0	0	5803.7	0	0	0	0
633	TRUE	Empty	Serine/threonine-protein phosphatase 6 regulatory subunit 1 OS=Homo sapiens OX=9606 GN=PPP6R1 PE=1 SV=5	PP6R1_HUMAN-DECOY		?		unknown	0	0	0	0	5742.9	0	0	0	0
492	TRUE	Empty	Low-density lipoprotein receptor-related protein 1B OS=Homo sapiens OX=9606 GN=LRP1B PE=1 SV=2	LRP1B_HUMAN	LRP1B	515 kDa		unknown	0	0	0	2247.1	5722.8	0	7383.1	0	0
611	TRUE	Empty	Dapper homolog 2 OS=Homo sapiens OX=9606 GN=DACT2 PE=2 SV=1	DACT2_HUMAN-DECOY		?		unknown	0	0	0	0	5065.2	0	0	0	0
501	TRUE	Empty	Histone acetyltransferase KAT6B OS=Homo sapiens OX=9606 GN=KAT6B PE=1 SV=3	KAT6B_HUMAN-DECOY		?	TRUE	unknown	3531	0	0	0	4901.7	0	0	0	0
489	TRUE	Empty	Prolow-density lipoprotein receptor-related protein 1 OS=Homo sapiens OX=9606 GN=LRP1 PE=1 SV=2	LRP1_HUMAN	LRP1	505 kDa		unknown	0	5784.6	0	0	4800	0	11158	0	3894.1
503	TRUE	Empty	sp|Q86UU0|BCL9L_HUMAN-DECOY B-cell CLL/lymphoma 9-like protein OS=Homo sapiens OX=9606...	BCL9L_HUMAN-DECOY		?		unknown	0	0	0	0	4486.7	0	0	0	0
510	TRUE	Empty	Fibrillin-1 OS=Homo sapiens OX=9606 GN=FBN1 PE=1 SV=4	FBN1_HUMAN-DECOY		?		unknown	0	0	0	0	1587.4	0	0	0	0
623	TRUE	Empty	Collagen alpha-1(III) chain OS=Homo sapiens OX=9606 GN=COL3A1 PE=1 SV=4	CO3A1_HUMAN	COL3A1	139 kDa		unknown	0	25748	14537	8841.7	0	11832	0	0	7284.8
610	TRUE	Empty	Alpha-fetoprotein OS=Homo sapiens OX=9606 GN=AFP PE=1 SV=1	FETA_HUMAN	AFP	69 kDa		unknown	12685	24627	0	0	0	0	0	0	0
613	TRUE	Empty	Gastrokine-1 OS=Homo sapiens OX=9606 GN=GKN1 PE=2 SV=3	GKN1_HUMAN	GKN1	22 kDa		unknown	0	20599	0	0	0	0	0	0	0
579	TRUE	Empty	sp|O00470|MEIS1_HUMAN-DECOY Homeobox protein Meis1 OS=Homo sapiens OX=9606 GN=MEIS1...	MEIS1_HUMAN-DECOY		?		unknown	0	18048	0	14772	0	0	0	0	0
575	TRUE	Empty	Plasma serine protease inhibitor OS=Homo sapiens OX=9606 GN=SERPINA5 PE=1 SV=3	IPSP_HUMAN	SERPINA5	46 kDa		unknown	16320	16123	0	0	0	0	0	0	0
564	TRUE	Empty	Cluster of Complement factor H-related protein 1 OS=Homo sapiens OX=9606 GN=CFHR1 PE=1 SV=2 (FHR1_HUMAN)	FHR1_HUMAN	CFHR1	38 kDa	TRUE	unknown	11940	16055	16596	10500	0	12733	0	0	0
564.1	TRUE	Empty	Complement factor H-related protein 1 OS=Homo sapiens OX=9606 GN=CFHR1 PE=1 SV=2	FHR1_HUMAN	CFHR1	38 kDa	TRUE	unknown	11940	16055	16596	10500	0	12733	0	0	0
652	TRUE	Empty	Insulin-like growth factor-binding protein 5 OS=Homo sapiens OX=9606 GN=IGFBP5 PE=1 SV=1	IBP5_HUMAN	IGFBP5	31 kDa		unknown	0	15602	0	0	0	0	0	0	0
681	TRUE	Empty	Cartilage acidic protein 1 OS=Homo sapiens OX=9606 GN=CRTAC1 PE=1 SV=2	CRAC1_HUMAN	CRTAC1	71 kDa		unknown	0	14192	0	0	0	0	0	0	0
544	TRUE	Empty	Calcineurin-binding protein cabin-1 OS=Homo sapiens OX=9606 GN=CABIN1 PE=1 SV=1	CABIN_HUMAN	CABIN1	246 kDa		unknown	0	13971	0	0	0	0	0	0	0
666	TRUE	Empty	Ectonucleotide pyrophosphatase/phosphodiesterase family member 2 OS=Homo sapiens OX=9606 GN=ENPP2 PE=1 SV=3	ENPP2_HUMAN	ENPP2	99 kDa		unknown	0	12624	0	0	0	0	0	0	0
583	TRUE	Empty	A-kinase anchor protein 13 OS=Homo sapiens OX=9606 GN=AKAP13 PE=1 SV=2	AKP13_HUMAN-DECOY		?	TRUE	unknown	0	12210	0	0	0	0	0	0	0
618	TRUE	Empty	Neurexin-3 OS=Homo sapiens OX=9606 GN=NRXN3 PE=1 SV=4	NRX3A_HUMAN	NRXN3	181 kDa		unknown	0	11735	0	0	0	0	0	0	0
640	TRUE	Empty	Procollagen C-endopeptidase enhancer 1 OS=Homo sapiens OX=9606 GN=PCOLCE PE=1 SV=2	PCOC1_HUMAN	PCOLCE	48 kDa		unknown	0	11297	0	0	0	0	0	0	0
502	TRUE	Empty	Titin OS=Homo sapiens OX=9606 GN=TTN PE=1 SV=4	TITIN_HUMAN-DECOY		?		unknown	0	7068	0	0	0	0	0	0	0
608	TRUE	Empty	Condensin-2 complex subunit D3 OS=Homo sapiens OX=9606 GN=NCAPD3 PE=1 SV=2	CNDD3_HUMAN-DECOY		?		unknown	0	6420.5	0	0	0	0	0	0	0
573	TRUE	Empty	Dynein heavy chain 5, axonemal OS=Homo sapiens OX=9606 GN=DNAH5 PE=1 SV=3	DYH5_HUMAN-DECOY		?		unknown	0	5338.5	0	0	0	0	0	0	0
588	TRUE	Empty	Zinc finger protein 281 OS=Homo sapiens OX=9606 GN=ZNF281 PE=1 SV=1	ZN281_HUMAN	ZNF281	97 kDa		unknown	0	4822.7	0	0	0	0	0	0	0
665	TRUE	Empty	Endosialin OS=Homo sapiens OX=9606 GN=CD248 PE=1 SV=1	CD248_HUMAN	CD248	81 kDa		unknown	0	4702.1	0	0	0	0	0	0	0
594	TRUE	Empty	E3 ubiquitin-protein ligase UBR5 OS=Homo sapiens OX=9606 GN=UBR5 PE=1 SV=2	UBR5_HUMAN	UBR5	309 kDa		unknown	0	4495.7	0	0	0	0	0	0	0
581	TRUE	Empty	Adhesion G protein-coupled receptor F4 OS=Homo sapiens OX=9606 GN=ADGRF4 PE=2 SV=3	AGRF4_HUMAN	ADGRF4	78 kDa		unknown	0	4122.6	0	0	0	0	0	0	0
650	TRUE	Empty	Kinesin-like protein KIF26A OS=Homo sapiens OX=9606 GN=KIF26A PE=1 SV=3	KI26A_HUMAN	KIF26A	195 kDa		unknown	0	4085.9	0	0	0	0	0	0	0
521	TRUE	Empty	AT-rich interactive domain-containing protein 1A OS=Homo sapiens OX=9606 GN=ARID1A PE=1 SV=3	ARI1A_HUMAN	ARID1A	242 kDa		unknown	0	3999.3	0	14662	0	0	0	0	0
524	TRUE	Empty	Charged multivesicular body protein 3 OS=Homo sapiens OX=9606 GN=CHMP3 PE=1 SV=3	CHMP3_HUMAN	CHMP3	25 kDa		unknown	0	3729.9	0	0	0	0	0	0	0
626	TRUE	Empty	sp|Q9UBT2|SAE2_HUMAN-DECOY SUMO-activating enzyme subunit 2 OS=Homo sapiens OX=9606...	SAE2_HUMAN-DECOY		?		unknown	0	3218.6	0	0	0	0	0	0	0
490	TRUE	Empty	Low-density lipoprotein receptor-related protein 2 OS=Homo sapiens OX=9606 GN=LRP2 PE=1 SV=3	LRP2_HUMAN	LRP2	522 kDa		unknown	0	3170.9	0	0	0	0	0	0	0
43.2	TRUE	Empty	Hemoglobin subunit gamma-1 OS=Homo sapiens OX=9606 GN=HBG1 PE=1 SV=2	HBG1_HUMAN (+1)	HBG1	16 kDa	TRUE	unknown	36244	0	0	44587	0	0	17279	0	0
51.8	TRUE	Empty	Keratin, type II cytoskeletal 6C OS=Homo sapiens OX=9606 GN=KRT6C PE=1 SV=3	K2C6C_HUMAN	KRT6C	60 kDa	TRUE	unknown	0	0	0	0	0	0	55548	0	0
51.9	TRUE	Empty	Keratin, type II cytoskeletal 3 OS=Homo sapiens OX=9606 GN=KRT3 PE=1 SV=3	K2C3_HUMAN	KRT3	64 kDa	TRUE	unknown	0	0	0	0	0	0	69593	0	0
51.11	TRUE	Empty	Keratin, type II cytoskeletal 1b OS=Homo sapiens OX=9606 GN=KRT77 PE=2 SV=3	K2C1B_HUMAN	KRT77	62 kDa	TRUE	unknown	0	0	50003	62302	0	0	52009	0	0
51.12	TRUE	Empty	Keratin, type II cytoskeletal 74 OS=Homo sapiens OX=9606 GN=KRT74 PE=1 SV=2	K2C74_HUMAN	KRT74	58 kDa	TRUE	unknown	0	0	0	0	0	0	79881	0	0
51.13	TRUE	Empty	Keratin, type II cuticular Hb4 OS=Homo sapiens OX=9606 GN=KRT84 PE=2 SV=2	KRT84_HUMAN	KRT84	65 kDa	TRUE	unknown	0	0	0	0	0	39515	78488	0	0
58.4	TRUE	Empty	POTE ankyrin domain family member F OS=Homo sapiens OX=9606 GN=POTEF PE=1 SV=2	POTEF_HUMAN	POTEF	121 kDa	TRUE	unknown	0	0	0	0	0	0	32933	0	0
122.2	TRUE	Empty	Heat shock 70 kDa protein 1-like OS=Homo sapiens OX=9606 GN=HSPA1L PE=1 SV=2	HS71L_HUMAN	HSPA1L	70 kDa	TRUE	unknown	0	0	0	0	0	0	0	0	22733
123.4	TRUE	Empty	Tubulin beta-2A chain OS=Homo sapiens OX=9606 GN=TUBB2A PE=1 SV=1	TBB2A_HUMAN (+1)	TUBB2A	50 kDa	TRUE	unknown	0	0	0	0	0	0	12605	0	0
134.8	TRUE	Empty	Keratin, type I cytoskeletal 15 OS=Homo sapiens OX=9606 GN=KRT15 PE=1 SV=3	K1C15_HUMAN	KRT15	49 kDa	TRUE	unknown	0	0	0	0	0	0	75662	0	36520
134.9	TRUE	Empty	Keratin, type I cuticular Ha1 OS=Homo sapiens OX=9606 GN=KRT31 PE=1 SV=3	K1H1_HUMAN	KRT31	47 kDa	TRUE	unknown	0	0	7651.1	0	0	0	32865	0	0
134.1	TRUE	Empty	Keratin, type I cuticular Ha6 OS=Homo sapiens OX=9606 GN=KRT36 PE=2 SV=1	KRT36_HUMAN	KRT36	52 kDa	TRUE	unknown	0	0	0	0	0	0	26948	0	0
161.6	TRUE	Empty	Immunoglobulin heavy variable 3-30-3 OS=Homo sapiens OX=9606 GN=IGHV3-30-3 PE=3 SV=1	HVC33_HUMAN	IGHV3-30-3	13 kDa	TRUE	unknown	24731	0	0	0	0	0	0	0	0
161.7	TRUE	Empty	Immunoglobulin heavy variable 3-9 OS=Homo sapiens OX=9606 GN=IGHV3-9 PE=1 SV=2	HV309_HUMAN	IGHV3-9	13 kDa	TRUE	unknown	0	0	0	26053	0	0	0	0	0
493	TRUE	Empty	Protein SON OS=Homo sapiens OX=9606 GN=SON PE=1 SV=4	SON_HUMAN	SON	264 kDa		unknown	0	0	0	7059.1	0	0	0	0	0
495	TRUE	Empty	Heterogeneous nuclear ribonucleoprotein M OS=Homo sapiens OX=9606 GN=HNRNPM PE=1 SV=3	HNRPM_HUMAN-DECOY		?		unknown	0	0	0	0	0	0	8314.4	0	0
497	TRUE	Empty	Collagen alpha-1(I) chain OS=Homo sapiens OX=9606 GN=COL1A1 PE=1 SV=5	CO1A1_HUMAN	COL1A1	139 kDa		unknown	0	0	8932	0	0	0	0	0	3011.7
498.3	TRUE	Empty	Immunoglobulin kappa variable 2-30 OS=Homo sapiens OX=9606 GN=IGKV2-30 PE=3 SV=2	KV230_HUMAN (+1)	IGKV2-30	13 kDa	TRUE	unknown	32958	0	0	0	0	49237	0	0	0
500	TRUE	Empty	Fibrillin-1 OS=Homo sapiens OX=9606 GN=FBN1 PE=1 SV=4	FBN1_HUMAN	FBN1	312 kDa		unknown	0	0	0	0	0	23208	0	0	0
504	TRUE	Empty	Retrotransposon Gag-like protein 9 OS=Homo sapiens OX=9606 GN=RTL9 PE=1 SV=1	RTL9_HUMAN	RTL9	144 kDa		unknown	0	0	0	0	0	6774.4	11147	0	0
506	TRUE	Empty	Protein SON OS=Homo sapiens OX=9606 GN=SON PE=1 SV=4	SON_HUMAN-DECOY		?		unknown	8200.2	0	0	0	0	0	10759	0	0
507	TRUE	Empty	Laminin subunit alpha-2 OS=Homo sapiens OX=9606 GN=LAMA2 PE=1 SV=4	LAMA2_HUMAN	LAMA2	344 kDa		unknown	0	0	0	0	0	4082.6	0	0	0
511	TRUE	Empty	Multiple epidermal growth factor-like domains protein 6 OS=Homo sapiens OX=9606 GN=MEGF6 PE=1 SV=4	MEGF6_HUMAN-DECOY		?		unknown	0	0	0	4013.7	0	0	0	0	0
512	TRUE	Empty	Tyrosine-protein phosphatase non-receptor type 13 OS=Homo sapiens OX=9606 GN=PTPN13 PE=1 SV=2	PTN13_HUMAN	PTPN13	277 kDa		unknown	0	0	0	0	0	0	14910	0	0
513	TRUE	Empty	Mesothelin OS=Homo sapiens OX=9606 GN=MSLN PE=1 SV=2	MSLN_HUMAN	MSLN	69 kDa		unknown	0	0	0	0	0	14637	0	0	0
514	TRUE	Empty	Syntaxin-3 OS=Homo sapiens OX=9606 GN=STX3 PE=1 SV=3	STX3_HUMAN	STX3	33 kDa		unknown	0	0	0	0	0	0	6604.5	0	0
515	TRUE	Empty	Bromodomain and WD repeat-containing protein 1 OS=Homo sapiens OX=9606 GN=BRWD1 PE=1 SV=4	BRWD1_HUMAN-DECOY		?		unknown	0	0	0	3389.7	0	0	4296.9	0	0
516	TRUE	Empty	Cluster of Myeloperoxidase OS=Homo sapiens OX=9606 GN=MPO PE=1 SV=1 (PERM_HUMAN)	PERM_HUMAN	MPO	84 kDa	TRUE	unknown	15154	0	0	16292	0	0	15393	0	0
516.1	TRUE	Empty	Myeloperoxidase OS=Homo sapiens OX=9606 GN=MPO PE=1 SV=1	PERM_HUMAN	MPO	84 kDa	TRUE	unknown	15154	0	0	16292	0	0	15393	0	0
517	TRUE	Empty	Retrotransposon Gag-like protein 9 OS=Homo sapiens OX=9606 GN=RTL9 PE=1 SV=1	RTL9_HUMAN-DECOY		?		unknown	0	0	0	0	0	0	5310.3	0	0
518	TRUE	Empty	Filaggrin OS=Homo sapiens OX=9606 GN=FLG PE=1 SV=3	FILA_HUMAN-DECOY		?		unknown	0	0	0	0	0	5611.2	0	0	0
522	TRUE	Empty	Beta-2-microglobulin OS=Homo sapiens OX=9606 GN=B2M PE=1 SV=1	B2MG_HUMAN	B2M	14 kDa		unknown	0	0	0	0	0	17295	0	0	0
525	TRUE	Empty	Cluster of Phosphatidylinositol 4-kinase alpha OS=Homo sapiens OX=9606 GN=PI4KA PE=1 SV=4 (PI4KA_HUMAN)	PI4KA_HUMAN	PI4KA	237 kDa	TRUE	unknown	0	0	0	9708.2	0	0	0	0	0
525.1	TRUE	Empty	Phosphatidylinositol 4-kinase alpha OS=Homo sapiens OX=9606 GN=PI4KA PE=1 SV=4	PI4KA_HUMAN	PI4KA	237 kDa	TRUE	unknown	0	0	0	9708.2	0	0	0	0	0
526	TRUE	Empty	Low-density lipoprotein receptor-related protein 2 OS=Homo sapiens OX=9606 GN=LRP2 PE=1 SV=3	LRP2_HUMAN-DECOY		?		unknown	0	0	0	0	0	0	5623.6	0	0
528	TRUE	Empty	A disintegrin and metalloproteinase with thrombospondin motifs 16 OS=Homo sapiens OX=9606 GN=ADAMTS16 PE=2 SV=3	ATS16_HUMAN	ADAMTS16	136 kDa		unknown	0	0	0	0	0	0	5359.1	0	0
529	TRUE	Empty	Heterogeneous nuclear ribonucleoprotein H3 OS=Homo sapiens OX=9606 GN=HNRNPH3 PE=1 SV=2	HNRH3_HUMAN-DECOY		?		unknown	0	0	0	0	0	0	11143	0	0
530	TRUE	Empty	Protein Red OS=Homo sapiens OX=9606 GN=IK PE=1 SV=3	RED_HUMAN-DECOY		?		unknown	0	0	1205.3	0	0	0	0	0	0
531	TRUE	Empty	Caspase-14 OS=Homo sapiens OX=9606 GN=CASP14 PE=1 SV=2	CASPE_HUMAN	CASP14	28 kDa		unknown	0	0	0	0	0	0	15199	0	0
533	TRUE	Empty	Osteopontin OS=Homo sapiens OX=9606 GN=SPP1 PE=1 SV=1	OSTP_HUMAN	SPP1	35 kDa		unknown	0	0	10669	0	0	0	0	0	0
536	TRUE	Empty	Midasin OS=Homo sapiens OX=9606 GN=MDN1 PE=1 SV=2	MDN1_HUMAN	MDN1	633 kDa		unknown	0	0	0	0	0	3178.4	0	0	0
538.2	TRUE	Empty	Putative pregnancy-specific beta-1-glycoprotein 7 OS=Homo sapiens OX=9606 GN=PSG7 PE=5 SV=3	PSG7_HUMAN	PSG7	47 kDa	TRUE	unknown	0	0	29466	0	0	0	0	0	0
539	TRUE	Empty	Protein S100-A8 OS=Homo sapiens OX=9606 GN=S100A8 PE=1 SV=1	S10A8_HUMAN	S100A8	11 kDa		unknown	0	0	0	0	0	0	45206	0	0
542	TRUE	Empty	SCO-spondin OS=Homo sapiens OX=9606 GN=SSPO PE=2 SV=2	SSPO_HUMAN-DECOY		?		unknown	0	0	0	0	0	0	2895.4	0	0
543	TRUE	Empty	Midasin OS=Homo sapiens OX=9606 GN=MDN1 PE=1 SV=2	MDN1_HUMAN-DECOY		?		unknown	0	0	0	0	0	0	0	0	10888
545	TRUE	Empty	Alpha-2-macroglobulin-like protein 1 OS=Homo sapiens OX=9606 GN=A2ML1 PE=1 SV=3	A2ML1_HUMAN	A2ML1	161 kDa		unknown	10141	0	0	13654	0	0	12748	0	0
546	TRUE	Empty	Glycogen phosphorylase, muscle form OS=Homo sapiens OX=9606 GN=PYGM PE=1 SV=6	PYGM_HUMAN	PYGM	97 kDa	TRUE	unknown	0	0	0	0	0	0	12595	0	0
547	TRUE	Empty	Nebulin OS=Homo sapiens OX=9606 GN=NEB PE=1 SV=5	NEBU_HUMAN-DECOY		?		unknown	0	0	0	0	0	7636.8	0	0	0
549	TRUE	Empty	Insulin receptor substrate 1 OS=Homo sapiens OX=9606 GN=IRS1 PE=1 SV=1	IRS1_HUMAN-DECOY		?		unknown	0	0	9084.5	0	0	0	0	0	0
550	TRUE	Empty	Mucin-19 OS=Homo sapiens OX=9606 GN=MUC19 PE=1 SV=3	MUC19_HUMAN-DECOY		?		unknown	0	0	0	0	0	0	12509	0	0
551	TRUE	Empty	SPARC-like protein 1 OS=Homo sapiens OX=9606 GN=SPARCL1 PE=1 SV=2	SPRL1_HUMAN	SPARCL1	75 kDa		unknown	0	0	18383	0	0	0	0	0	0
552	TRUE	Empty	Junction-mediating and -regulatory protein OS=Homo sapiens OX=9606 GN=JMY PE=1 SV=2	JMY_HUMAN	JMY	111 kDa		unknown	6855.1	0	0	0	0	0	0	0	0
556	TRUE	Empty	Microtubule-actin cross-linking factor 1, isoforms 1/2/3/5 OS=Homo sapiens OX=9606 GN=MACF1 PE=1 SV=4	MACF1_HUMAN	MACF1	838 kDa	TRUE	unknown	0	0	0	0	0	27930	0	0	0
557	TRUE	Empty	Histone-lysine N-methyltransferase 2A OS=Homo sapiens OX=9606 GN=KMT2A PE=1 SV=5	KMT2A_HUMAN-DECOY		?	TRUE	unknown	0	0	0	0	0	0	10728	0	0
558	TRUE	Empty	Cathepsin B OS=Homo sapiens OX=9606 GN=CTSB PE=1 SV=3	CATB_HUMAN	CTSB	38 kDa		unknown	0	0	0	8060.5	0	0	0	0	0
559	TRUE	Empty	Sickle tail protein homolog OS=Homo sapiens OX=9606 GN=KIAA1217 PE=1 SV=2	SKT_HUMAN-DECOY		?		unknown	4349.7	0	0	0	0	0	0	0	0
563	TRUE	Empty	Ankyrin-3 OS=Homo sapiens OX=9606 GN=ANK3 PE=1 SV=3	ANK3_HUMAN	ANK3	480 kDa	TRUE	unknown	3461.1	0	0	0	0	0	0	0	0
565	TRUE	Empty	A-kinase anchor protein 8-like OS=Homo sapiens OX=9606 GN=AKAP8L PE=1 SV=4	AKP8L_HUMAN-DECOY		?		unknown	0	0	0	1871.6	0	0	0	0	0
567	TRUE	Empty	Cluster of Keratin, type II cuticular Hb5 OS=Homo sapiens OX=9606 GN=KRT85 PE=1 SV=1 (KRT85_HUMAN)	KRT85_HUMAN	KRT85	56 kDa	TRUE	unknown	0	0	0	0	0	0	20637	0	0
567.1	TRUE	Empty	Keratin, type II cuticular Hb5 OS=Homo sapiens OX=9606 GN=KRT85 PE=1 SV=1	KRT85_HUMAN	KRT85	56 kDa	TRUE	unknown	0	0	0	0	0	0	26530	0	0
568	TRUE	Empty	Histone-lysine N-methyltransferase EHMT1 OS=Homo sapiens OX=9606 GN=EHMT1 PE=1 SV=4	EHMT1_HUMAN-DECOY		?		unknown	0	0	3751.6	0	0	0	0	0	0
569	TRUE	Empty	Proto-oncogene tyrosine-protein kinase receptor Ret OS=Homo sapiens OX=9606 GN=RET PE=1 SV=3	RET_HUMAN-DECOY		?		unknown	0	0	0	0	0	7996.7	0	0	0
570	TRUE	Empty	Hemicentin-1 OS=Homo sapiens OX=9606 GN=HMCN1 PE=1 SV=2	HMCN1_HUMAN	HMCN1	613 kDa		unknown	11055	0	0	0	0	0	0	0	0
571	TRUE	Empty	Keratin, type II cytoskeletal 80 OS=Homo sapiens OX=9606 GN=KRT80 PE=1 SV=2	K2C80_HUMAN	KRT80	51 kDa	TRUE	unknown	0	0	0	0	0	0	12865	0	0
572	TRUE	Empty	Roundabout homolog 1 OS=Homo sapiens OX=9606 GN=ROBO1 PE=1 SV=1	ROBO1_HUMAN	ROBO1	181 kDa		unknown	0	0	0	0	0	4659.5	0	0	0
574	TRUE	Empty	Cluster of Pregnancy-specific beta-1-glycoprotein 11 OS=Homo sapiens OX=9606 GN=PSG11 PE=2 SV=3 (PSG11_HUMAN)	PSG11_HUMAN	PSG11	37 kDa	TRUE	unknown	0	0	0	0	0	28904	0	0	0
574.1	TRUE	Empty	Pregnancy-specific beta-1-glycoprotein 11 OS=Homo sapiens OX=9606 GN=PSG11 PE=2 SV=3	PSG11_HUMAN	PSG11	37 kDa	TRUE	unknown	0	0	0	0	0	39450	0	0	0
576	TRUE	Empty	Atrial natriuretic peptide-converting enzyme OS=Homo sapiens OX=9606 GN=CORIN PE=1 SV=2	CORIN_HUMAN	CORIN	116 kDa		unknown	0	0	0	0	0	0	7977.8	0	0
577	TRUE	Empty	A-kinase anchor protein 13 OS=Homo sapiens OX=9606 GN=AKAP13 PE=1 SV=2	AKP13_HUMAN	AKAP13	308 kDa		unknown	3000.3	0	0	0	0	0	0	0	0
578	TRUE	Empty	Activating transcription factor 7-interacting protein 2 OS=Homo sapiens OX=9606 GN=ATF7IP2 PE=1 SV=2	MCAF2_HUMAN	ATF7IP2	76 kDa		unknown	0	0	0	0	0	0	10936	0	0
580	TRUE	Empty	Golgin subfamily B member 1 OS=Homo sapiens OX=9606 GN=GOLGB1 PE=1 SV=2	GOGB1_HUMAN	GOLGB1	376 kDa		unknown	77294	0	0	0	0	41820	0	0	0
582	TRUE	Empty	Vasorin OS=Homo sapiens OX=9606 GN=VASN PE=1 SV=1	VASN_HUMAN	VASN	72 kDa		unknown	0	0	0	0	0	6475.8	0	0	0
584	TRUE	Empty	Collagen alpha-2(VI) chain OS=Homo sapiens OX=9606 GN=COL6A2 PE=1 SV=4	CO6A2_HUMAN	COL6A2	109 kDa		unknown	0	0	5219.2	0	0	0	0	0	0
587	TRUE	Empty	Nuclear receptor coactivator 2 OS=Homo sapiens OX=9606 GN=NCOA2 PE=1 SV=2	NCOA2_HUMAN	NCOA2	159 kDa		unknown	0	0	0	0	0	0	6274.2	0	0
589	TRUE	Empty	Dynein heavy chain 5, axonemal OS=Homo sapiens OX=9606 GN=DNAH5 PE=1 SV=3	DYH5_HUMAN	DNAH5	529 kDa	TRUE	unknown	0	0	0	0	0	0	13734	0	0
590	TRUE	Empty	Double zinc ribbon and ankyrin repeat-containing protein 1 OS=Homo sapiens OX=9606 GN=DZANK1 PE=1 SV=3	DZAN1_HUMAN	DZANK1	82 kDa		unknown	0	0	0	4731.6	0	0	0	0	0
595	TRUE	Empty	Biorientation of chromosomes in cell division protein 1-like 1 OS=Homo sapiens OX=9606 GN=BOD1L1 PE=1 SV=2	BD1L1_HUMAN	BOD1L1	330 kDa		unknown	0	0	0	0	0	9146.6	0	0	0
597	TRUE	Empty	Zinc finger protein 541 OS=Homo sapiens OX=9606 GN=ZNF541 PE=1 SV=3	ZN541_HUMAN-DECOY		?		unknown	0	0	0	0	0	0	7756.3	0	0
598	TRUE	Empty	Transcription factor SOX-4 OS=Homo sapiens OX=9606 GN=SOX4 PE=1 SV=1	SOX4_HUMAN-DECOY		?		unknown	22286	0	0	0	0	0	0	0	0
599	TRUE	Empty	Potassium voltage-gated channel subfamily A member 4 OS=Homo sapiens OX=9606 GN=KCNA4 PE=1 SV=2	KCNA4_HUMAN	KCNA4	73 kDa	TRUE	unknown	0	0	0	4006.4	0	0	0	0	0
602	TRUE	Empty	Phosphatidylethanolamine-binding protein 4 OS=Homo sapiens OX=9606 GN=PEBP4 PE=1 SV=3	PEBP4_HUMAN	PEBP4	26 kDa		unknown	0	0	0	0	0	17550	0	0	0
603	TRUE	Empty	Metallothionein-1L OS=Homo sapiens OX=9606 GN=MT1L PE=2 SV=1	MT1L_HUMAN	MT1L	6 kDa		unknown	0	0	0	0	0	0	0	0	15950
604	TRUE	Empty	Cytoplasmic dynein 1 heavy chain 1 OS=Homo sapiens OX=9606 GN=DYNC1H1 PE=1 SV=5	DYHC1_HUMAN-DECOY		?		unknown	11003	0	0	0	0	0	0	0	0
605	TRUE	Empty	Desmocollin-3 OS=Homo sapiens OX=9606 GN=DSC3 PE=1 SV=3	DSC3_HUMAN	DSC3	100 kDa		unknown	0	0	0	0	0	0	23418	0	0
606	TRUE	Empty	Azurocidin OS=Homo sapiens OX=9606 GN=AZU1 PE=1 SV=3	CAP7_HUMAN	AZU1	27 kDa		unknown	17221	0	0	15291	0	0	0	0	0
607	TRUE	Empty	Pro-cathepsin H OS=Homo sapiens OX=9606 GN=CTSH PE=1 SV=4	CATH_HUMAN	CTSH	37 kDa		unknown	14278	0	0	0	0	0	0	0	0
609	TRUE	Empty	Prostate stem cell antigen OS=Homo sapiens OX=9606 GN=PSCA PE=1 SV=2	PSCA_HUMAN	PSCA	12 kDa		unknown	0	0	0	0	0	0	21926	0	0
612	TRUE	Empty	GON-4-like protein OS=Homo sapiens OX=9606 GN=GON4L PE=1 SV=1	GON4L_HUMAN-DECOY		?	TRUE	unknown	0	0	0	0	0	0	2945.9	0	0
615	TRUE	Empty	U1 small nuclear ribonucleoprotein 70 kDa OS=Homo sapiens OX=9606 GN=SNRNP70 PE=1 SV=2	RU17_HUMAN-DECOY		?		unknown	0	0	0	0	0	0	0	0	7582.3
616	TRUE	Empty	Purine nucleoside phosphorylase OS=Homo sapiens OX=9606 GN=PNP PE=1 SV=2	PNPH_HUMAN	PNP	32 kDa		unknown	0	0	0	0	0	0	6699.5	0	0
617	TRUE	Empty	Cluster of Neutrophil defensin 3 OS=Homo sapiens OX=9606 GN=DEFA3 PE=1 SV=1 (DEF3_HUMAN)	DEF3_HUMAN	DEFA3	10 kDa	TRUE	unknown	23569	0	0	20214	0	0	0	0	0
617.1	TRUE	Empty	Neutrophil defensin 3 OS=Homo sapiens OX=9606 GN=DEFA3 PE=1 SV=1	DEF3_HUMAN	DEFA3	10 kDa	TRUE	unknown	23569	0	0	20214	0	0	0	0	0
619	TRUE	Empty	Immunoglobulin lambda variable 1-40 OS=Homo sapiens OX=9606 GN=IGLV1-40 PE=1 SV=2	LV140_HUMAN	IGLV1-40	12 kDa		unknown	0	0	0	14694	0	0	0	0	0
620.1	TRUE	Empty	Immunoglobulin kappa variable 1D-39 OS=Homo sapiens OX=9606 GN=IGKV1D-39 PE=3 SV=2	KVD39_HUMAN	IGKV1D-39	13 kDa	TRUE	unknown	0	0	0	19883	0	0	0	0	0
620.2	TRUE	Empty	Immunoglobulin kappa variable 1D-12 OS=Homo sapiens OX=9606 GN=IGKV1D-12 PE=1 SV=2	KVD12_HUMAN	IGKV1D-12	13 kDa	TRUE	unknown	20097	0	0	0	0	0	0	0	0
621	TRUE	Empty	Cluster of Immunoglobulin heavy variable 1-46 OS=Homo sapiens OX=9606 GN=IGHV1-46 PE=1 SV=2 (HV146_HUMAN)	HV146_HUMAN [2]	IGHV1-46	13 kDa	TRUE	unknown	36750	0	0	0	0	0	0	0	0
621.1	TRUE	Empty	Immunoglobulin heavy variable 1-69 OS=Homo sapiens OX=9606 GN=IGHV1-69 PE=1 SV=2	HV169_HUMAN (+1)	IGHV1-69	13 kDa	TRUE	unknown	36750	0	0	0	0	0	0	0	0
622	TRUE	Empty	Cyclic AMP-responsive element-binding protein 5 OS=Homo sapiens OX=9606 GN=CREB5 PE=1 SV=3	CREB5_HUMAN-DECOY		?		unknown	0	0	0	12866	0	0	0	0	0
624	TRUE	Empty	Chromodomain-helicase-DNA-binding protein 6 OS=Homo sapiens OX=9606 GN=CHD6 PE=1 SV=4	CHD6_HUMAN	CHD6	305 kDa	TRUE	unknown	4930.8	0	0	0	0	0	0	0	0
629	TRUE	Empty	Tetranectin OS=Homo sapiens OX=9606 GN=CLEC3B PE=1 SV=3	TETN_HUMAN	CLEC3B	23 kDa		unknown	0	0	14310	5730.2	0	13292	0	0	0
630	TRUE	Empty	Teneurin-2 OS=Homo sapiens OX=9606 GN=TENM2 PE=1 SV=3	TEN2_HUMAN	TENM2	308 kDa		unknown	0	0	0	4106.7	0	0	0	0	0
631	TRUE	Empty	Spermatogenesis-associated protein 31E1 OS=Homo sapiens OX=9606 GN=SPATA31E1 PE=2 SV=2	S31E1_HUMAN	SPATA31E1	157 kDa		unknown	0	0	0	0	0	9665.7	0	0	0
632	TRUE	Empty	Signal recognition particle subunit SRP68 OS=Homo sapiens OX=9606 GN=SRP68 PE=1 SV=2	SRP68_HUMAN	SRP68	71 kDa		unknown	0	0	0	0	0	0	10538	0	0
635	TRUE	Empty	Rho GDP-dissociation inhibitor 2 OS=Homo sapiens OX=9606 GN=ARHGDIB PE=1 SV=3	GDIR2_HUMAN	ARHGDIB	23 kDa		unknown	15844	0	0	15364	0	0	0	0	0
636	TRUE	Empty	Putative zinc finger and SCAN domain-containing protein 5C OS=Homo sapiens OX=9606 GN=ZSCAN5C PE=5 SV=1	ZSA5C_HUMAN-DECOY		?		unknown	2137.6	0	0	0	0	0	0	0	0
637	TRUE	Empty	Protein phosphatase 1 regulatory subunit 12B OS=Homo sapiens OX=9606 GN=PPP1R12B PE=1 SV=2	MYPT2_HUMAN-DECOY		?	TRUE	unknown	3641.1	0	0	0	0	0	0	0	0
641	TRUE	Empty	Peptidoglycan recognition protein 1 OS=Homo sapiens OX=9606 GN=PGLYRP1 PE=1 SV=1	PGRP1_HUMAN	PGLYRP1	22 kDa		unknown	12051	0	0	10761	0	14907	0	0	0
642	TRUE	Empty	Peptidase inhibitor 16 OS=Homo sapiens OX=9606 GN=PI16 PE=1 SV=1	PI16_HUMAN	PI16	49 kDa		unknown	0	0	37111	0	0	13284	0	0	0
644	TRUE	Empty	Neutrophil elastase OS=Homo sapiens OX=9606 GN=ELANE PE=1 SV=1	ELNE_HUMAN	ELANE	29 kDa		unknown	18457	0	0	17057	0	0	0	0	0
646	TRUE	Empty	Myeloblastin OS=Homo sapiens OX=9606 GN=PRTN3 PE=1 SV=3	PRTN3_HUMAN	PRTN3	28 kDa		unknown	32083	0	0	19928	0	0	0	0	0
647	TRUE	Empty	Myelin expression factor 2 OS=Homo sapiens OX=9606 GN=MYEF2 PE=1 SV=3	MYEF2_HUMAN	MYEF2	64 kDa		unknown	0	0	0	19878	0	0	0	0	0
654	TRUE	Empty	Immunoglobulin lambda variable 1-51 OS=Homo sapiens OX=9606 GN=IGLV1-51 PE=1 SV=2	LV151_HUMAN	IGLV1-51	12 kDa		unknown	0	0	15067	0	0	0	0	0	0
657	TRUE	Empty	Immunoglobulin kappa variable 2-24 OS=Homo sapiens OX=9606 GN=IGKV2-24 PE=3 SV=1	KV224_HUMAN	IGKV2-24	13 kDa		unknown	0	0	0	29380	0	0	0	0	0
659	TRUE	Empty	Immunoglobulin kappa variable 1-16 OS=Homo sapiens OX=9606 GN=IGKV1-16 PE=1 SV=2	KV116_HUMAN	IGKV1-16	13 kDa	TRUE	unknown	14686	0	0	0	0	0	0	0	0
660	TRUE	Empty	Histidine ammonia-lyase OS=Homo sapiens OX=9606 GN=HAL PE=1 SV=1	HUTH_HUMAN	HAL	73 kDa		unknown	0	0	0	0	0	0	19966	0	0
662	TRUE	Empty	Gamma-glutamylcyclotransferase OS=Homo sapiens OX=9606 GN=GGCT PE=1 SV=1	GGCT_HUMAN	GGCT	21 kDa		unknown	0	0	0	0	0	0	7862.5	0	0
664	TRUE	Empty	Extracellular superoxide dismutase [Cu-Zn] OS=Homo sapiens OX=9606 GN=SOD3 PE=1 SV=2	SODE_HUMAN	SOD3	26 kDa		unknown	0	0	0	0	0	11130	0	0	0
667	TRUE	Empty	Ecto-NOX disulfide-thiol exchanger 2 OS=Homo sapiens OX=9606 GN=ENOX2 PE=1 SV=2	ENOX2_HUMAN	ENOX2	70 kDa		unknown	0	0	14741	0	0	0	0	0	0
668	TRUE	Empty	Ecto-NOX disulfide-thiol exchanger 1 OS=Homo sapiens OX=9606 GN=ENOX1 PE=1 SV=1	ENOX1_HUMAN	ENOX1	73 kDa		unknown	21964	0	0	0	0	0	0	0	0
669	TRUE	Empty	Disintegrin and metalloproteinase domain-containing protein 17 OS=Homo sapiens OX=9606 GN=ADAM17 PE=1 SV=1	ADA17_HUMAN-DECOY		?		unknown	0	0	0	0	0	5287.7	0	0	0
670	TRUE	Empty	Dickkopf-related protein 3 OS=Homo sapiens OX=9606 GN=DKK3 PE=1 SV=2	DKK3_HUMAN	DKK3	38 kDa		unknown	0	0	8021.8	0	0	0	0	0	0
671	TRUE	Empty	Desmocollin-1 OS=Homo sapiens OX=9606 GN=DSC1 PE=1 SV=2	DSC1_HUMAN	DSC1	100 kDa		unknown	0	0	0	0	0	0	7776	0	0
672	TRUE	Empty	Dermcidin OS=Homo sapiens OX=9606 GN=DCD PE=1 SV=2	DCD_HUMAN	DCD	11 kDa		unknown	0	0	0	0	0	0	33018	0	0
675	TRUE	Empty	Cystatin-A OS=Homo sapiens OX=9606 GN=CSTA PE=1 SV=1	CYTA_HUMAN	CSTA	11 kDa		unknown	0	0	0	0	0	0	20947	0	0
677	TRUE	Empty	Corneodesmosin OS=Homo sapiens OX=9606 GN=CDSN PE=1 SV=3	CDSN_HUMAN	CDSN	52 kDa		unknown	0	0	0	0	0	0	15309	0	0
679	TRUE	Empty	Chorionic somatomammotropin hormone 1 OS=Homo sapiens OX=9606 GN=CSH1 PE=1 SV=1	CSH1_HUMAN (+1)	CSH1	25 kDa	TRUE	unknown	0	0	0	16673	0	0	0	0	0
683	TRUE	Empty	Calmodulin-like protein 5 OS=Homo sapiens OX=9606 GN=CALML5 PE=1 SV=2	CALL5_HUMAN	CALML5	16 kDa		unknown	0	0	0	0	0	0	13801	0	0
684	TRUE	Empty	Cadherin-1 OS=Homo sapiens OX=9606 GN=CDH1 PE=1 SV=3	CADH1_HUMAN	CDH1	97 kDa		unknown	0	0	3887.1	5910.7	0	0	0	0	0
685	TRUE	Empty	CLIP-associating protein 2 OS=Homo sapiens OX=9606 GN=CLASP2 PE=1 SV=3	CLAP2_HUMAN	CLASP2	141 kDa	TRUE	unknown	0	0	0	0	0	9578.4	0	0	0
686	TRUE	Empty	Arginase-1 OS=Homo sapiens OX=9606 GN=ARG1 PE=1 SV=2	ARGI1_HUMAN	ARG1	35 kDa		unknown	0	0	0	0	0	0	13111	0	0
END OF FILE
